# Supplementary material for: A formal [4 + 2] annulation of diamines and prop-2-ynyl sulfonium salts for the synthesis of tetrahydroquinoxalines
Source: Royal Society of Chemistry journal article supplement (doi:10.1039/d2ob01590k), 2022-01-01

## Supporting Information

### A formal [4+2] annulation of diamines and prop-2-ynyl sulfonium salts: for the synthesis of tetrahydroquinoxalines

Fei Xia,<sup>\*a</sup> Yu-Qian Lu,<sup>a</sup> Peng Sun,<sup>a</sup> Qiu-Yan Guo,<sup>a</sup> Qiao-Li Shi,<sup>a</sup> Jun-Zhe Zhang,<sup>a</sup> and  
Chong Qiu<sup>\*a</sup>

<sup>a</sup> Artemisinin Research Center, and Institute of Chinese Materia Medica, China

Academy of Chinese Medical Sciences, Beijing 100700, China. Fax: (+86)

10-6255-4449 E-mail: fxia@icmm.ac.cn

#### Table of Contents

|                                                                                   |    |
|-----------------------------------------------------------------------------------|----|
| Part I Experimental part .....                                                    | 1  |
| 1. General information .....                                                      | 2  |
| 2. General The Preparation of Substrates.....                                     | 2  |
| 2.1 The substrates investigated.....                                              | 2  |
| 2.2 The preparation of diamines.....                                              | 3  |
| 2.3 The preparation of prop-2-ynyl sulfonium salts.....                           | 3  |
| 3. General procedure for the preparation of tetrahydroquinoxalines <b>3</b> ..... | 3  |
| 4. Procedure for the preparation of gram-scale reaction of <b>3aa</b> .....       | 4  |
| 5. Synthetic transformation.....                                                  | 4  |
| 6. Characterization data of compounds .....                                       | 5  |
| 7. X-Ray crystallographic data of <b>3af</b> .....                                | 16 |
| 8. References .....                                                               | 17 |
| Part II NMR spectra.....                                                          | 18 |

## Part I Experimental part

### 1. General information

Unless otherwise indicated, commercial reagents and solvents were used as received without further purification. Anhydrous THF and toluene were distilled from sodium and benzophenone. Anhydrous  $\text{CH}_2\text{Cl}_2$  was distilled from  $\text{CaH}_2$ . Column chromatography was performed on silica gel 200~300 mesh. All  $^1\text{H}$  NMR ( 500 and 600MHz),  $^{13}\text{C}$  NMR (100 and 125 MHz) spectra were recorded in  $\text{CDCl}_3$ , with tetramethylsilane as an internal standard and reported in parts per million (ppm,  $\delta$ ).  $^1\text{H}$  NMR Spectroscopy splitting patterns were designated as singlet (s), doublet (d), triplet (t), quartet (q). Splitting patterns that could not be interpreted or easily visualized were designated as multiplet (m).

### 2. The Preparation of Substrates.

#### 2.1. The substrates investigated

*o*-phenyldiamine derivatives:

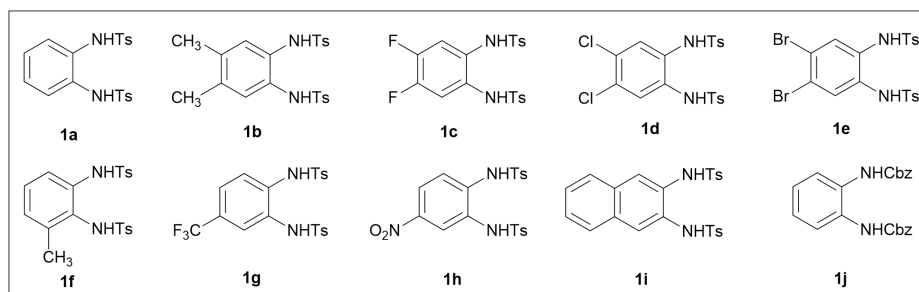

Prop-2-ynyl sulfonium salts:

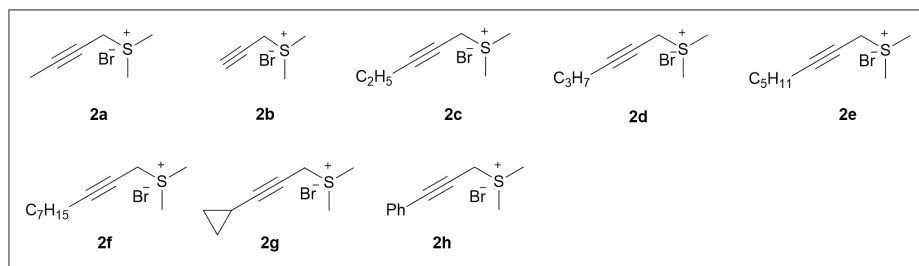

*o*-phenyldiamine derivatives **1a-1j**<sup>[1-2]</sup> and prop-2-ynyl sulfonium salts **2a-2b**,<sup>[3]</sup> **2g-2h**<sup>[4-5]</sup> are known compounds. Prop-2-ynyl sulfonium salts **2c-2f** were prepared according to the reported literature procedures.

## 2.2. The preparation of diamines

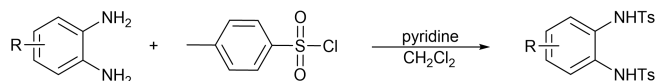

The *o*-phenylenediamines (5.0 mmol, 1 equiv) was dissolved in CH<sub>2</sub>Cl<sub>2</sub> (15 mL), then to this mixture was added a solution of 4-toluene sulfonyl chloride (2.09 g, 2.2 equiv) and pyridine (1.2 mL, 3 equiv) in CH<sub>2</sub>Cl<sub>2</sub> (20 mL). The mixture was heated at reflux overnight. The organic layer is washed three times successively by dilute hydrochloric acid, saturated NaHCO<sub>3</sub> and saturated NaCl. The organic layer was dried over Na<sub>2</sub>SO<sub>4</sub>, filtered, concentrated under reduced pressure and the residue was purified by chromatography on silica gel ( petroleum ether/ethylacetate, typically 4/1) to give the desired product **1a-1i**.

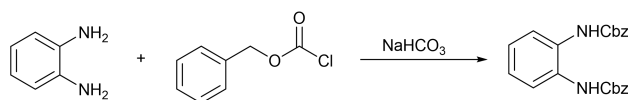

The *o*-phenylenediamine (0.54g, 5.0 mmol, 1 equiv), NaHCO<sub>3</sub> (0.84 g, 10 mmol, 2 equiv) and ethyl acetate/water (30mL/15mL) was added in a 100ml reaction flask. The mixture was stirred for 10 minutes, benzyl chloroformate (1.70 g, 10 mmol, 2 equiv) was added, After stirring for overnight, the organic layer was washed with saturated NaCl and dried over anhydrous Na<sub>2</sub>SO<sub>4</sub>. Then it was filtered and concentrated under reduced pressure. Purification by chromatography on silica gel (petroleum ether/EtOAc = 5/1) gave the desired product **1j** (1.5g, 80%yield).

## 2.3. The preparation of prop-2-ynyl sulfonium salts

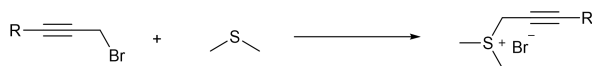

1-Bromoprop-2-yne (10 mmol, 1.0 equiv) is added in a 25ml reaction flask, then dimethyl sulfide (2.2g, 3.0equiv) and acetone (1mL) was added to this reaction flask. The mixture was stirred at room temperature for 24 h. The mixture was filtered by filling funnel to give the desired product **2a-2h**.

### 3. General procedure for the preparation of tetrahydroquinoxalines **3**.

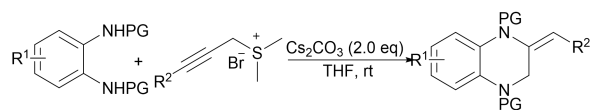

To an oven-dried 25 mL Schlenk tube equipped with a stir bar was charged with protected *o*-phenyldiamines **1** (0.2 mmol), 3-alkyl- or 3-aryl-substituted prop-2-ynyl sulfonium salts **2** (0.3 mmol) and anhydrous Cs<sub>2</sub>CO<sub>3</sub> (130.4 mg, 0.40 mmol). To this mixture was added freshly distilled THF (2 mL). After stirring for overnight, the reaction mixture was concentrated and the residue was purified by chromatography on silica gel (petroleum ether/ethylacetate, typically 4/1) to give the desired product **3**.

### 4 Procedure for the preparation of gram-scale reaction of **3aa**

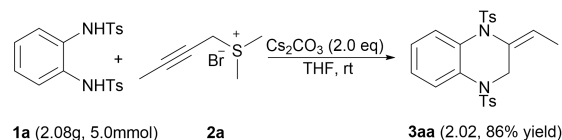

To an oven-dried 100 mL Schlenk tube equipped with a stir bar was charged with sulfonyl protected *o*-phenyldiamine **1a** (5 mmol, 2.08g), but-2-ynyl sulfonium salt **2a** (7.5 mmol, 1.46g) and anhydrous Cs<sub>2</sub>CO<sub>3</sub> (3.26 g, 10 mmol). To this mixture was added freshly distilled THF (40 mL). After stirring for overnight, the reaction mixture was concentrated and the residue was purified by chromatography on silica gel (petroleum ether/ethylacetate = 4/1) to give the desired product **3aa** (2.02g, 86%yield).

### 5. Synthetic transformation

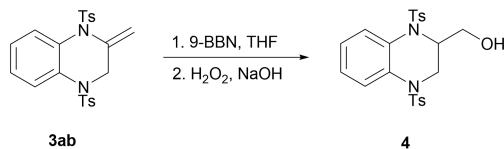

To a solution of **3ab** (90.8 mg, 0.20 mmol) in 2 mL THF was added 9-BBN (0.6 mL, 0.3 mmol, 0.5 mol/L in THF) dropwise at 0°C. The mixture was stirred at room temperature until the complete consumption of **3ab**. Then NaOH (30 mg) and 0.1 mL H<sub>2</sub>O<sub>2</sub> was added and quenched with Na<sub>2</sub>S<sub>2</sub>O<sub>3</sub> after 1h. The mixture was extracted with CH<sub>2</sub>Cl<sub>2</sub>. The organic layer was washed with brine, dried over MgSO<sub>4</sub>, filtered and

concentrated and purified by chromatography on silica gel (petroleum ether/ethyl acetate = 2/1) to afford the desired product **4**.

## 6. Characterization data

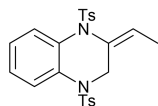

**3aa**

(*E*)-2-ethylidene-1,4-ditosyl-1,2,3,4-tetrahydroquinoxaline **3aa**, white solid, mp 123-124 °C, 88.9 mg, 95% yield;  $R_f = 0.4$  (petroleum ether / EtOAc = 4:1);  $^1\text{H NMR}$  (500 MHz,  $\text{CDCl}_3$ )  $\delta$  7.79-7.77 (m, 1H), 7.70-7.68 (m, 1H), 7.34 (d,  $J = 8.5$  Hz, 2H), 7.28 (d,  $J = 8.0$  Hz, 2H), 7.20-7.15 (m, 4H), 7.12 (d,  $J = 8.0$  Hz, 2H), 5.89 (q,  $J = 14.5$  Hz,  $J = 7.0$  Hz, 1H), 3.82 (s, 2H), 2.40 (s, 3H), 2.35 (s, 3H), 1.73 (d,  $J = 7.5$  Hz, 3H);  $^{13}\text{C NMR}$  (125 MHz,  $\text{CDCl}_3$ )  $\delta$  144.6, 144.1, 135.5, 134.6, 129.8, 129.5, 129.4, 127.6, 127.1, 126.7, 125.8, 125.6, 125.1, 122.8, 42.6, 21.6, 21.5, 13.4; HRMS (ESI) calcd for  $\text{C}_{24}\text{H}_{25}\text{N}_2\text{O}_4\text{S}_2[\text{M}+\text{H}]^+$ : 469.1250, found 469.1246.

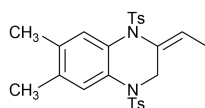

**3ba**

(*E*)-2-ethylidene-6,7-dimethyl-1,4-ditosyl-1,2,3,4-tetrahydroquinoxaline **3ba**, white solid, mp 118-119°C, 89.3 mg, 90% yield;  $R_f = 0.5$  (petroleum ether / EtOAc = 4:1);  $^1\text{H NMR}$  (500 MHz,  $\text{CDCl}_3$ )  $\delta$  7.54 (s, 2H), 7.46 (s, 2H), 7.35 (d,  $J = 8.0$  Hz, 2H), 7.28 (d,  $J = 8.5$  Hz, 2H), 7.19 (d,  $J = 8.0$  Hz, 2H), 7.12 (d,  $J = 8.5$  Hz, 2H), 5.84 (q,  $J = 14.5$  Hz,  $J = 7.0$  Hz, 1H), 3.76 (s, 2H), 2.40 (s, 3H), 2.35 (s, 3H), 2.26 (s, 3H), 2.24 (s, 3H), 1.68 (d,  $J = 7.5$  Hz, 3H);  $^{13}\text{C NMR}$  (125 MHz,  $\text{CDCl}_3$ )  $\delta$  144.4, 143.9, 135.6, 134.8, 134.5, 133.8, 129.7, 129.3, 127.6, 127.1, 127.0, 126.3, 126.2, 123.5, 42.7, 21.6, 21.5, 19.6, 19.5, 13.4; HRMS (ESI) calcd for  $\text{C}_{26}\text{H}_{29}\text{N}_2\text{O}_4\text{S}_2[\text{M}+\text{H}]^+$ : 497.1563, found 497.1555.

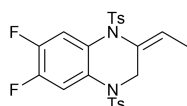

### 3ca

(*E*)-2-ethylidene-6,7-difluoro-1,4-ditosyl-1,2,3,4-tetrahydroquinoxaline **3ca**, white solid, mp 133-134°C; 87.7 mg, 87% yield;  $R_f = 0.5$  (petroleum ether / EtOAc = 4:1);  $^1\text{H}$  NMR (600 MHz,  $\text{CDCl}_3$ )  $\delta$  7.74 (s, 1H), 7.67 (s, 1H), 7.35 (d,  $J = 5.4$  Hz, 2H), 7.28 (d,  $J = 8.4$  Hz, 2H), 7.23 (d,  $J = 6.6$  Hz, 2H), 7.16 (d,  $J = 7.8$  Hz, 2H), 5.90 (d,  $J = 9.6$  Hz, 1H), 3.70 (s, 2H), 2.42 (s, 3H), 2.37 (s, 3H), 1.73 (d,  $J = 4.8$  Hz, 3H);  $^{13}\text{C}$  NMR (150 MHz,  $\text{CDCl}_3$ )  $\delta$  148.1 (d,  $J = 13.5$  Hz), 147.8 (d,  $J = 13.5$  Hz), 146.5 (d,  $J = 13.5$  Hz), 146.2 (d,  $J = 13.5$  Hz), 145.1, 144.6, 134.8, 134.0, 130.0, 129.6, 127.9, 127.6, 127.1, 125.3, 114.0 (d,  $J = 22.5$  Hz), 111.8 (d,  $J = 22.5$  Hz), 41.5, 21.6, 13.5;  $^{19}\text{F}$  NMR (565 MHz,  $\text{CDCl}_3$ )  $\delta$  -138.2--138.3(m, 2F); HRMS (ESI) calcd for  $\text{C}_{24}\text{H}_{23}\text{F}_2\text{N}_2\text{O}_4\text{S}_2[\text{M}+\text{H}]^+$ : 505.1062, found 505.1054.

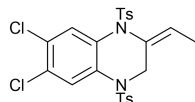

### 3da

(*E*)-2-ethylidene-6,7-dichloro-1,4-ditosyl-1,2,3,4-tetrahydroquinoxaline **3da**, white solid, mp 135-136°C; 91.4 mg, 85%;  $R_f = 0.5$  (petroleum ether / EtOAc = 4:1);  $^1\text{H}$  NMR (600 MHz,  $\text{CDCl}_3$ )  $\delta$  7.95 (s, 1H), 7.90 (s, 1H), 7.37 (d,  $J = 4.8$  Hz, 2H), 7.31 (d,  $J = 4.8$  Hz, 2H), 7.24 (d,  $J = 5.4$  Hz, 2H), 7.17 (d,  $J = 5.4$  Hz, 2H), 5.91 (d,  $J = 4.2$  Hz, 1H), 3.72 (s, 2H), 2.42 (s, 3H), 2.38 (s, 3H), 1.73 (d,  $J = 8.4$  Hz, 3H);  $^{13}\text{C}$  NMR (150 MHz,  $\text{CDCl}_3$ )  $\delta$  145.1, 144.7, 134.8, 134.0, 130.0, 129.6, 129.2, 128.4, 128.3, 128.1, 127.7, 127.1, 126.2, 125.3, 123.7, 41.6, 21.7, 21.6, 13.5; HRMS (ESI) calcd for  $\text{C}_{24}\text{H}_{23}\text{Cl}_2\text{N}_2\text{O}_4\text{S}_2[\text{M}+\text{H}]^+$ : 537.0471, found 537.0466.

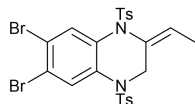

### 3ea

(*E*)-2-ethylidene-6,7-dibromo-1,4-ditosyl-1,2,3,4-tetrahydroquinoxaline **3ea**, white solid, mp 161-162 °C; 110.6 mg, 88% yield;  $R_f = 0.4$  (petroleum ether / EtOAc = 4:1);  $^1\text{H}$  NMR (500 MHz,  $\text{CDCl}_3$ )  $\delta$  8.09 (s, 1H), 8.05 (s, 1H), 7.37 ( $J = 8.5$  Hz, 2H), 7.31 (d,  $J = 8.5$  Hz, 2H), 7.24 (d,  $J = 8.5$  Hz, 2H), 7.17 (d,  $J = 8.5$  Hz, 2H), 5.91 (q,  $J = 14.5$  Hz,  $J = 6.0$  Hz, 1H), 3.72 (s, 2H), 2.43 (s, 3H), 2.38 (s, 3H), 1.73 (d,  $J = 7.5$  Hz,

3H);  $^{13}\text{C}$  NMR (125 MHz,  $\text{CDCl}_3$ )  $\delta$  145.2, 144.8, 134.8, 134.1, 130.0, 129.7, 129.2, 128.9, 127.7, 126.7, 125.3, 121.0, 120.1, 41.6, 21.7, 21.6, 13.6; HRMS (ESI) calcd for  $\text{C}_{24}\text{H}_{22}\text{Br}_2\text{N}_2\text{O}_4\text{S}_2[\text{M}+\text{H}]^+$ : 624.9461, found 624.9452.

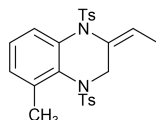

### 3fa

(*E*)-2-ethylidene-5-methyl-1,4-ditosyl-1,2,3,4-tetrahydroquinoxaline **3fa**, white solid, r.r >20:1 on the crude reaction mixture, mp 121-122 °C; 86.1 mg, 89%;  $R_f$  = 0.5 (petroleum ether / EtOAc = 4:1);  $^1\text{H}$  NMR (500 MHz,  $\text{CDCl}_3$ )  $\delta$  7.70 (d,  $J$  = 8.5 Hz, 2H), 7.64 (d,  $J$  = 8.5 Hz, 2H), 7.32-7.28 (m, 4H), 7.21 (d,  $J$  = 7.0 Hz, 1H), 7.07-7.01 (m, 2H), 5.96-5.90 (q,  $J$  = 17.0 Hz,  $J$  = 9.5 Hz, 1H), 4.66 (d,  $J$  = 14.5 Hz, 1H), 3.93 (d,  $J$  = 14.5 Hz, 1H), 2.47 (s, 3H), 2.45 (s, 3H), 2.39 (s, 3H), 1.64 (d,  $J$  = 7.5 Hz, 3H);  $^{13}\text{C}$  NMR (125 MHz,  $\text{CDCl}_3$ )  $\delta$  148.2, 145.1, 144.1, 143.8, 142.4, 141.4, 138.2, 133.2, 131.3, 130.9, 129.7, 129.5, 129.4, 129.0, 126.1, 125.4, 124.9, 66.1, 21.6, 21.5, 16.6, 13.1; HRMS (ESI) calcd for  $\text{C}_{25}\text{H}_{27}\text{N}_2\text{O}_4\text{S}_2[\text{M}+\text{H}]^+$ : 483.1407, found 483.1408.

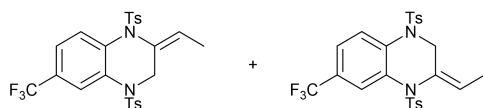

### 3ga

### 3ga\*

(*E*)-2-ethylidene-1,4-ditosyl-6-(trifluoromethyl)-1,2,3,4-tetrahydroquinoxaline **3ga**, and (*E*)-2-ethylidene-1,4-ditosyl-7-(trifluoromethyl)-1,2,3,4-tetrahydroquinoxaline **3ga\***. A mixture of two isomers, r.r = 4:1 on the crude reaction mixture; white solid, mp 146-148 °C; 89.2 mg, 83%.  $R_f$  = 0.5 (petroleum ether / EtOAc = 4:1);  $^1\text{H}$  NMR (500 MHz,  $\text{CDCl}_3$ )  $\delta$  8.07 (s, 1H), 7.84 (d,  $J$  = 9.0 Hz, 1H), 7.38-7.32 (m, 5H), 7.22 (d,  $J$  = 8.0 Hz, 2H), 7.17 (d,  $J$  = 8.0 Hz, 2H), 5.98-5.93 (m, 1H), 3.87 (s, 2H), 2.42 (s, 3H), 2.37 (s, 3H), 1.74 (d,  $J$  = 7.0 Hz, 3H);  $^{13}\text{C}$  NMR (125 MHz,  $\text{CDCl}_3$ )  $\delta$  145.0, 144.7, 135.1, 134.3, 132.2, 130.0, 129.7, 129.6, 129.0, 127.8, 127.7, 127.6, 127.2, 127.1, 125.8, 122.8 (d,  $J$  = 3.75 Hz), 122.4, 122.3 (d,  $J$  = 3.75 Hz), 42.4, 41.7, 21.7, 21.6, 13.5;  $^{19}\text{F}$  NMR (565 MHz,  $\text{CDCl}_3$ )  $\delta$  -62.3, -62.4; HRMS (ESI) calcd for  $\text{C}_{25}\text{H}_{24}\text{F}_3\text{N}_2\text{O}_4\text{S}_2[\text{M}+\text{H}]^+$ : 537.1130, found 537.1130.

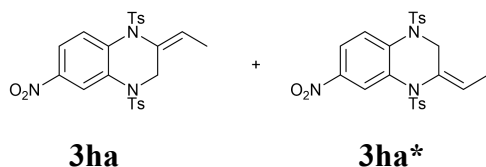

(*E*)-2-ethylidene-6-nitro-1,4-ditosyl-1,2,3,4-tetrahydroquinoxaline **3ha** and (*E*)-2-ethylidene-7-nitro-1,4-ditosyl-1,2,3,4-tetrahydroquinoxaline **3ha\***. A mixture of two isomers, r.r = 10:1 on the crude reaction mixture; white solid, mp 149-151 °C; 82.3 mg, 80%.  $R_f = 0.5$  (petroleum ether / EtOAc = 4:1);  $^1\text{H NMR}$  (500 MHz,  $\text{CDCl}_3$ )  $\delta$  8.66 (d,  $J = 8.0$  Hz, 1H), 7.97 (q,  $J = 9.0$  Hz,  $J = 2.5$  Hz, 1H), 7.90 (d,  $J = 9.5$  Hz, 1H), 7.42 (d,  $J = 8.5$  Hz, 2H), 7.37 (d,  $J = 8.5$  Hz, 2H), 7.25 (d,  $J = 9.0$  Hz, 2H), 7.19 (d,  $J = 8.0$  Hz, 2H), 5.98 (q,  $J = 14.5$  Hz,  $J = 7.5$  Hz, 1H), 3.92 (s, 2H), 2.43 (s, 3H), 2.38 (s, 3H), 1.77 (d,  $J = 7.5$  Hz, 3H);  $^{13}\text{C NMR}$  (125 MHz,  $\text{CDCl}_3$ )  $\delta$  145.3, 145.1, 143.6, 134.8, 134.7, 134.1, 130.1, 129.9, 128.7, 128.6, 127.8, 127.1, 125.3, 121.7, 121.1, 120.4, 42.4, 21.7, 21.6, 13.6; HRMS (ESI) calcd for  $\text{C}_{24}\text{H}_{24}\text{N}_3\text{O}_6\text{S}_2[\text{M}+\text{H}]^+$ : 514.1107, found 514.1107.

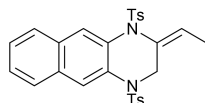

(*E*)-2-ethylidene-1,4-ditosyl-1,2,3,4-tetrahydrobenzo[*g*]quinoxaline **3ia**, white solid, mp 167-168 °C; 86.1 mg, 83% yield;  $R_f = 0.3$  (petroleum ether / EtOAc = 4:1);  $^1\text{H NMR}$  (500 MHz,  $\text{CDCl}_3$ )  $\delta$  8.17 (s, 1H), 8.04 (s, 1H), 7.84-7.81 (m, 1H), 7.76-7.74 (m, 1H), 7.50-7.44 (m, 2H), 7.40-7.37 (m, 4H), 7.18 (d,  $J = 10.0$  Hz, 2H), 7.13 (d,  $J = 10.0$  Hz, 2H), 5.98 (q,  $J = 18.5$  Hz,  $J = 9.0$  Hz, 1H), 4.05 (s, 2H), 2.40 (s, 3H), 2.34 (s, 3H), 1.75 (d,  $J = 9.0$  Hz, 3H);  $^{13}\text{C NMR}$  (125 MHz,  $\text{CDCl}_3$ )  $\delta$  144.5, 144.2, 135.7, 135.2, 131.2, 130.5, 129.9, 129.6, 128.7, 128.5, 127.8, 127.5, 127.1, 126.4, 126.3, 126.0, 123.9, 119.9, 43.9, 21.6, 21.5, 13.4; HRMS (ESI) calcd for  $\text{C}_{28}\text{H}_{26}\text{N}_2\text{O}_4\text{S}_2\text{Na}[\text{M}+\text{Na}]^+$ : 541.1226, found 541.1221.

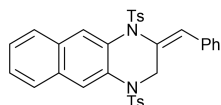

**3ih**



(*E*)-2-benzylidene-1,4-ditosyl-1,2,3,4-tetrahydrobenzo[*g*]quinoxaline **3ig**, white solid, mp 156-157 °C; 91.7 mg, 79%;  $R_f = 0.5$  (petroleum ether / EtOAc = 4:1);  $^1\text{H}$  NMR (500 MHz,  $\text{CDCl}_3$ )  $\delta$  8.21 (s, 1H), 8.07 (s, 1H), 7.87-7.85 (m, 1H), 7.78-7.76 (m, 1H), 7.49-7.41 (m, 6H), 7.38-7.34 (m, 1H), 7.24-7.20 (m, 4H), 7.15 (d,  $J = 7.5$  Hz, 2H), 7.06 (d,  $J = 8.0$  Hz, 2H), 6.96 (s, 1H), 4.31 (s, 2H), 2.42 (s, 3H), 2.34 (s, 3H);  $^{13}\text{C}$  NMR (125 MHz,  $\text{CDCl}_3$ )  $\delta$  144.8, 144.1, 135.5, 135.2, 134.2, 131.3, 130.5, 130.4, 130.0, 129.6, 129.1, 128.8, 128.5, 128.4, 128.4, 128.3, 127.9, 127.8, 127.6, 127.2, 126.5, 126.1, 124.1, 119.9, 44.7, 21.7, 21.6; HRMS (ESI) calcd for  $\text{C}_{33}\text{H}_{29}\text{N}_2\text{O}_4\text{S}_2[\text{M}+\text{H}]^+$ : 581.15697, found 581.1569.

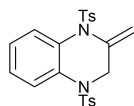

### **3ab**

2-methylene-1,4-ditosyl-1,2,3,4-tetrahydroquinoline **3ab**, white solid, mp 110-111 °C; 80.1 mg, 88% yield;  $R_f = 0.4$  (petroleum ether / EtOAc = 4:1);  $^1\text{H}$  NMR (500 MHz,  $\text{CDCl}_3$ )  $\delta$  7.83 (q,  $J = 7.5$  Hz,  $J = 2.0$  Hz, 1H), 7.67 (q,  $J = 7.5$  Hz,  $J = 2.0$  Hz, 1H), 7.37 (d,  $J = 8.0$  Hz, 2H), 7.32 (d,  $J = 8.0$  Hz, 2H), 7.21 - 7.18 (m, 3H), 7.17-7.14 (m, 3H), 5.33 (s, 1H), 4.95 (s, 1H), 3.78 (s, 2H), 2.39 (s, 3H), 2.36 (s, 3H);  $^{13}\text{C}$  NMR (125 MHz,  $\text{CDCl}_3$ )  $\delta$  144.8, 144.2, 135.4, 134.4, 134.3, 129.8, 129.7, 129.6, 129.5, 127.6, 127.3, 125.7, 125.4, 125.2, 123.4, 112.7, 48.0, 21.6, 21.5; HRMS (ESI) calcd for  $\text{C}_{23}\text{H}_{23}\text{N}_2\text{O}_4\text{S}_2[\text{M}+\text{H}]^+$ : 455.1094, found 455.1086.

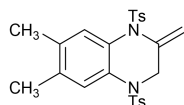

### **3bb**

6,7-dimethyl-2-methylene-1,4-ditosyl-1,2,3,4-tetrahydroquinoline **3bb**, white solid, mp 109-110 °C; 83.9 mg, 87% yield;  $R_f = 0.4$  (petroleum ether / EtOAc = 4:1);  $^1\text{H}$  NMR (500 MHz,  $\text{CDCl}_3$ )  $\delta$  7.59 (s, 1H), 7.34 (s, 1H), 7.38 (d,  $J = 8.0$  Hz, 2H), 7.32 (d,  $J = 8.5$  Hz, 2H), 7.20 (d,  $J = 8.0$  Hz, 2H), 7.15 (d,  $J = 8.0$  Hz, 2H), 5.26 (s, 1H), 4.87 (s, 1H), 3.70 (s, 2H), 2.39 (s, 3H), 2.36 (s, 3H), 2.27 (s, 3H), 2.25 (s, 3H);  $^{13}\text{C}$  NMR (125 MHz,  $\text{CDCl}_3$ )  $\delta$  144.6, 144.0, 135.6, 134.6, 134.5, 134.4, 134.2, 129.7, 129.5, 127.6, 127.4, 127.3, 126.9, 125.7, 124.1, 112.3, 48.1, 21.6, 19.6; HRMS (ESI) calcd

for  $C_{25}H_{27}N_2O_4S_2[M+H]^+$ : 483.1407, found 483.1404.

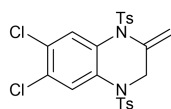

### 3db

6,7-dichloro-2-methylene-1,4-ditosyl-1,2,3,4-tetrahydroquinoxaline **3db**, white solid, mp 110-111°C; 88.6 mg, 85% yield;  $R_f = 0.4$  (petroleum ether / EtOAc = 4:1);  $^1H$  NMR (500 MHz,  $CDCl_3$ )  $\delta$  8.03 (s, 1H), 7.89 (s, 1H), 7.39 (d,  $J = 8.0$  Hz, 2H), 7.33 (d,  $J = 8.0$  Hz, 2H), 7.24 (d,  $J = 8.0$  Hz, 2H), 7.19 (d,  $J = 8.0$  Hz, 2H), 5.34 (s, 1H), 5.00 (s, 1H), 3.63 (s, 2H), 2.42 (s, 3H), 2.38 (s, 3H);  $^{13}C$  NMR (125 MHz,  $CDCl_3$ )  $\delta$  145.4, 144.8, 134.7, 133.7, 132.5, 130.0, 129.8, 129.1, 129.0, 128.5, 128.0, 127.7, 127.4, 125.6, 124.6, 115.0, 47.0, 21.7, 21.6; HRMS (ESI) calcd for  $C_{23}H_{21}Cl_2N_2O_4S_2[M+H]^+$ : 523.0314, found 523.0314.

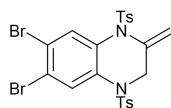

### 3eb

6,7-dibromo-2-methylene-1,4-ditosyl-1,2,3,4-tetrahydroquinoxaline, white solid, mp 114-115 °C; 104.8 mg, 86%.  $R_f = 0.4$  (petroleum ether / EtOAc = 4:1);  $^1H$  NMR (500 MHz,  $CDCl_3$ )  $\delta$  8.16 (s, 1H), 8.03 (s, 1H), 7.40 (d,  $J = 8.5$  Hz, 2H), 7.33 (d,  $J = 8.0$  Hz, 2H), 7.24 (d,  $J = 8.0$  Hz, 2H), 7.19 (d,  $J = 8.0$  Hz, 2H), 5.34 (s, 1H), 4.99 (s, 1H), 3.63 (s, 2H), 2.42 (s, 3H), 2.38 (s, 3H);  $^{13}C$  NMR (125 MHz,  $CDCl_3$ )  $\delta$  145.4, 144.9, 134.7, 133.7, 132.4, 130.0, 129.8, 129.1, 128.6, 127.7, 127.5, 120.8, 120.7, 115.0, 47.0, 21.7, 21.6; HRMS (ESI) calcd for  $C_{23}H_{21}Br_2N_2O_4S_2[M+H]^+$ : 610.9304, found 610.9287.

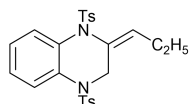

### 3ac

(*E*)-2-propylidene-1,4-ditosyl-1,2,3,4-tetrahydroquinoxaline **3ac**, white solid, mp 116-117 °C; 88.9 mg, 92% yield;  $R_f = 0.5$  (petroleum ether / EtOAc = 4:1);  $^1H$  NMR (500 MHz,  $CDCl_3$ )  $\delta$  7.79-7.77 (m, 1H), 7.70-7.68 (m, 1H), 7.36 (d,  $J = 8.0$  Hz, 2H), 7.31 (d,  $J = 8.0$  Hz, 2H), 7.20 (d,  $J = 8.0$  Hz, 2H), 7.16-7.12 (m, 4H), 5.87 (t,  $J = 16.0$

Hz,  $J = 8.0$  Hz, 1H), 3.84 (s, 2H), 2.40 (s, 3H), 2.35 (s, 3H), 2.14-2.08 (m, 2H), 1.05 (t,  $J = 15.0$  Hz,  $J = 7.5$  Hz, 3H);  $^{13}\text{C}$  NMR (125 MHz,  $\text{CDCl}_3$ )  $\delta$  144.6, 144.1, 135.5, 134.7, 133.4, 129.8, 129.7, 129.5, 129.4, 127.7, 127.1, 125.9, 125.7, 125.0, 122.5, 43.0, 21.6, 21.5, 21.2, 13.7; HRMS (ESI) calcd for  $\text{C}_{25}\text{H}_{27}\text{N}_2\text{O}_4\text{S}_2[\text{M}+\text{H}]^+$ : 483.1407, found 483.1400.

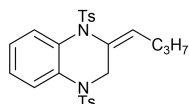

### 3ad

(*E*)-2-butylidene-1,4-ditosyl-1,2,3,4-tetrahydroquinoxaline **3ad**, white solid, mp 121-122 °C; 88.5 mg, 89% yield;  $R_f = 0.6$  (petroleum ether / EtOAc = 4:1);  $^1\text{H}$  NMR (500 MHz,  $\text{CDCl}_3$ )  $\delta$  7.78-7.77 (m, 1H), 7.69-7.67 (m, 1H), 7.35 (d,  $J = 8.0$  Hz, 2H), 7.31 (d,  $J = 8.0$  Hz, 2H), 7.19 (d,  $J = 8.0$  Hz, 2H), 7.16-7.12 (m, 4H), 5.87 (t,  $J = 15.5$  Hz,  $J = 7.5$  Hz, 1H), 3.87 (s, 2H), 2.40 (s, 3H), 2.35 (s, 3H), 2.06 (q,  $J = 15.0$  Hz,  $J = 7.5$  Hz, 2H), 1.50-1.43 (m, 2H), 0.99 (t,  $J = 15.0$  Hz,  $J = 7.5$  Hz, 3H);  $^{13}\text{C}$  NMR (125 MHz,  $\text{CDCl}_3$ )  $\delta$  144.6, 144.1, 135.5, 134.8, 132.0, 129.8, 129.7, 129.5, 127.6, 127.1, 126.2, 125.8, 124.9, 122.4, 43.1, 29.9, 22.5, 21.6, 21.5, 13.8; HRMS (ESI) calcd for  $\text{C}_{26}\text{H}_{29}\text{N}_2\text{O}_4\text{S}_2[\text{M}+\text{H}]^+$ : 497.1563, found 497.1558.

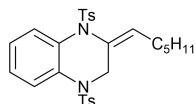

### 3ae

(*E*)-2-hexylidene-1,4-ditosyl-1,2,3,4-tetrahydroquinoxaline **3ae**, white solid, mp 144-145 °C; 94.6 mg, 90% yield;  $R_f = 0.6$  (petroleum ether / EtOAc = 4:1);  $^1\text{H}$  NMR (500 MHz,  $\text{CDCl}_3$ )  $\delta$  7.78-7.76 (m, 1H), 7.69-7.67 (m, 1H), 7.35 (d,  $J = 8.5$  Hz, 2H), 7.31 (d,  $J = 8.0$  Hz, 2H), 7.19 (d,  $J = 8.0$  Hz, 2H), 7.16-7.12 (m, 4H), 5.87 (t,  $J = 15.5$  Hz,  $J = 7.5$  Hz, 1H), 3.86 (s, 2H), 2.40 (s, 3H), 2.35 (s, 3H), 2.07 (q,  $J = 15.0$  Hz,  $J = 7.5$  Hz, 2H), 1.44-1.41 (m, 2H), 1.37-1.33 (m, 4H), 0.94 (t,  $J = 13.0$  Hz,  $J = 6.5$  Hz, 3H);  $^{13}\text{C}$  NMR (125 MHz,  $\text{CDCl}_3$ )  $\delta$  144.6, 144.1, 135.5, 134.8, 132.2, 129.8, 129.7, 129.5, 127.6, 127.1, 126.0, 125.9, 124.9, 122.4, 43.1, 31.4, 28.8, 27.8, 22.5, 21.6, 21.5, 14.1; HRMS (ESI) calcd for  $\text{C}_{28}\text{H}_{33}\text{N}_2\text{O}_4\text{S}_2[\text{M}+\text{H}]^+$ : 525.1876, found 525.1873.

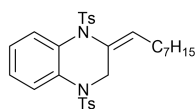

### 3af

(*E*)-2-octylidene-1,4-ditosyl-1,2,3,4-tetrahydroquinoxaline **3af**, white solid, mp 126-127 °C; 100.7 mg, 91% yield;  $R_f = 0.6$  (petroleum ether / EtOAc = 4:1);  $^1\text{H NMR}$  (500 MHz,  $\text{CDCl}_3$ )  $\delta$  7.78-7.76 (m, 1H), 7.69-7.67 (m, 1H), 7.35 (d,  $J = 8.0$  Hz, 2H), 7.31 (d,  $J = 8.5$  Hz, 2H), 7.19 (d,  $J = 8.0$  Hz, 2H), 7.16-7.12 (m, 4H), 5.87 (t,  $J = 15.5$  Hz,  $J = 7.5$  Hz, 1H), 3.86 (s, 2H), 2.40 (s, 3H), 2.35 (s, 3H), 2.09-2.04 (m, 2H), 1.43-1.40 (m, 2H), 1.34-1.31 (m, 8H), 0.91 (t,  $J = 13.5$  Hz,  $J = 6.5$  Hz, 3H);  $^{13}\text{C NMR}$  (125 MHz,  $\text{CDCl}_3$ )  $\delta$  144.6, 144.1, 135.5, 134.8, 132.2, 129.8, 129.7, 129.5, 127.6, 127.1, 126.0, 125.9, 124.9, 122.4, 43.1, 31.8, 29.2, 29.1, 27.9, 22.7, 21.6, 21.5, 14.1; HRMS (ESI) calcd for  $\text{C}_{30}\text{H}_{37}\text{N}_2\text{O}_4\text{S}_2[\text{M}+\text{H}]^+$ : 553.2189, found 553.2181.

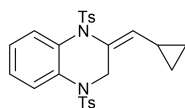

### 3ag

3-cyclopropylidene-1,4-ditosyl-1,2,3,4-tetrahydroquinoxaline **3ag**, white solid, mp 126-127 °C; 84.9 mg, 88% yield;  $R_f = 0.5$  (petroleum ether / EtOAc = 4:1);  $^1\text{H NMR}$  (500 MHz,  $\text{CDCl}_3$ )  $\delta$  7.81-7.77 (m, 2H), 7.34 (d,  $J = 8.0$  Hz, 2H), 7.30 (d,  $J = 8.5$  Hz, 2H), 7.20-7.15 (m, 4H), 7.08 (d,  $J = 8.0$  Hz, 2H), 5.17 (d,  $J = 10.5$  Hz, 1H), 3.84 (s, 2H), 2.40 (s, 3H), 2.33 (s, 3H), 1.54-1.51 (m, 1H), 0.97-0.93 (m, 2H), 0.53-0.50 (m, 2H);  $^{13}\text{C NMR}$  (125 MHz,  $\text{CDCl}_3$ )  $\delta$  144.6, 144.0, 137.0, 135.1, 134.4, 129.7, 129.4, 129.3, 128.7, 127.7, 127.4, 125.5, 125.3, 125.2, 123.4, 123.1, 42.5, 21.6, 21.5, 10.3, 7.7; HRMS (ESI) calcd for  $\text{C}_{26}\text{H}_{27}\text{N}_2\text{O}_4\text{S}_2[\text{M}+\text{H}]^+$ : 495.1407, found 495.1401.

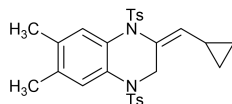

### 3bg

(*E*)-2-(cyclopropylmethylene)-6,7-dimethyl-1,4-ditosyl-1,2,3,4-tetrahydroquinoxaline **3bg**, white solid, mp 151-152 °C; 90.8, 87% yield;  $R_f = 0.5$  (petroleum ether / EtOAc = 4:1);  $^1\text{H NMR}$  (500 MHz,  $\text{CDCl}_3$ )  $\delta$  7.56 (d,  $J = 11.5$  Hz, 2H), 7.35 (d,  $J = 8.5$  Hz, 2H), 7.29 (d,  $J = 8.5$  Hz, 2H), 7.20 (d,  $J = 8.0$  Hz, 2H), 7.09 (d,  $J = 8.0$  Hz, 2H), 5.12

(d,  $J = 5.5$  Hz, 1H), 3.76 (s, 2H), 2.40 (s, 3H), 2.34 (s, 3H), 2.27 (s, 3H), 2.25 (s, 3H), 1.52-1.47 (m, 1H), 0.95-0.91 (m, 2H), 0.50-0.47 (m, 2H) ;  $^{13}\text{C}$  NMR (125 MHz,  $\text{CDCl}_3$ )  $\delta$  144.4, 143.8, 136.8, 135.2, 134.4, 134.1, 133.9, 129.7, 129.2, 127.8, 127.4, 126.9, 126.1, 125.8, 124.0, 123.4, 42.5, 21.6, 19.6, 10.3, 7.7; HRMS (ESI) calcd for  $\text{C}_{28}\text{H}_{31}\text{N}_2\text{O}_4\text{S}_2[\text{M}+\text{H}]^+$ : 523.1704, found 523.1704.

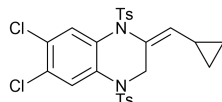

### 3dg

(*E*)-6,7-dichloro-2-(cyclopropylmethylene)-1,4-ditosyl-1,2,3,4-tetrahydroquinoxaline **3dg**, white solid, mp 163-164 °C; 94.3 mg, 84% yield;  $R_f = 0.5$  (petroleum ether / EtOAc = 4:1);  $^1\text{H}$  NMR (500 MHz,  $\text{CDCl}_3$ )  $\delta$  8.00 (d,  $J = 4.0$  Hz, 2H), 7.42-7.37 (m, 4H), 7.28 (d,  $J = 4.5$  Hz, 2H), 7.17 (d,  $J = 8.0$  Hz, 2H), 5.22 (d,  $J = 11.0$  Hz, 1H), 3.78 (s, 2H), 2.45 (s, 3H), 2.39 (s, 3H), 1.58-1.53 (m, 1H), 1.01-0.99 (m, 2H), 0.57-0.56 (m, 2H) ;  $^{13}\text{C}$  NMR (125 MHz,  $\text{CDCl}_3$ )  $\delta$  145.2, 144.6, 138.2, 134.6, 133.9, 130.0, 129.6, 128.5, 128.3, 127.8, 127.5, 126.0, 124.1, 121.9, 41.8, 21.7, 21.6, 10.5, 7.8; HRMS (ESI) calcd for  $\text{C}_{26}\text{H}_{25}\text{Cl}_2\text{N}_2\text{O}_4\text{S}_2[\text{M}+\text{H}]^+$ : 563.0627, found 563.0615.

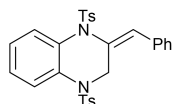

### 3ah

(*E*)-2-benzylidene-1,4-ditosyl-1,2,3,4-tetrahydroquinoxaline **3ah**, white solid, mp 158-159 °C; 90.3 mg, 85% yield.  $R_f = 0.5$  (petroleum ether / EtOAc = 4:1);  $^1\text{H}$  NMR (500 MHz,  $\text{CDCl}_3$ )  $\delta$  7.83 (q,  $J = 7.5$  Hz,  $J = 2.0$  Hz, 1H), 7.73 (q,  $J = 7.5$  Hz,  $J = 2.5$  Hz, 1H), 7.44-7.41 (m, 4H), 7.36 (t,  $J = 15.0$  Hz,  $J = 7.5$  Hz, 1H), 7.25-7.24 (m, 2H), 7.22-7.19 (m, 2H), 7.12 (d,  $J = 7.0$  Hz, 2H), 7.06-7.02 (m, 4H), 6.87 (s, 1H), 4.09 (s, 2H), 2.44 (s, 3H), 2.35 (s, 3H);  $^{13}\text{C}$  NMR (125 MHz,  $\text{CDCl}_3$ )  $\delta$  144.9, 143.9, 135.2, 134.6, 134.1, 130.9, 129.9, 129.5, 129.3, 129.2, 128.8, 128.4, 127.8, 127.1, 127.0, 125.9, 125.7, 125.1, 122.9, 43.1, 21.7, 21.6; HRMS (ESI) calcd for  $\text{C}_{29}\text{H}_{27}\text{N}_2\text{O}_4\text{S}_2[\text{M}+\text{H}]^+$ : 531.1407, found 531.1401.

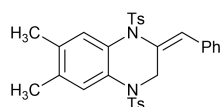

### 3bh

(*E*)-2-benzylidene-6,7-dimethyl-1,4-ditosyl-1,2,3,4-tetrahydroquinoxaline **3bh**, white solid, mp 162-163 °C; 93.6 mg, 84% yield;  $R_f = 0.5$  (petroleum ether / EtOAc = 4:1);  $^1\text{H NMR}$  (500 MHz,  $\text{CDCl}_3$ )  $\delta$  7.59 (s, 1H), 7.49 (s, 1H), 7.43-7.40 (m, 4H), 7.37-7.35 (m, 1H), 7.26-7.24 (m, 2H), 7.08 (d,  $J = 7.0$  Hz, 2H), 7.04 (s, 4H), 6.82 (s, 1H), 4.02 (s, 2H), 2.44 (s, 3H), 2.35 (s, 3H), 2.30 (s, 3H), 2.26 (s, 3H);  $^{13}\text{C NMR}$  (125 MHz,  $\text{CDCl}_3$ )  $\delta$  144.8, 143.7, 135.2, 134.7, 134.6, 134.2, 133.8, 130.6, 129.9, 129.4, 129.2, 128.7, 128.3, 127.8, 127.4, 127.1, 126.9, 126.6, 126.3, 43.0, 21.7, 21.6, 19.7, 19.6; HRMS (ESI) calcd for  $\text{C}_{31}\text{H}_{31}\text{N}_2\text{O}_4\text{S}_2[\text{M}+\text{H}]^+$ : 559.1725, found 559.1724.

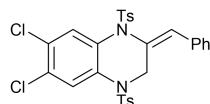

### 3dh

(*E*)-2-benzylidene-6,7-dichloro-1,4-ditosyl-1,2,3,4-tetrahydroquinoxaline **3dh**, white solid, mp 180-181 °C; 96.9 mg, 81% yield;  $R_f = 0.5$  (petroleum ether / EtOAc = 4:1);  $^1\text{H NMR}$  (500 MHz,  $\text{CDCl}_3$ )  $\delta$  8.01 (s, 1H), 7.97 (s, 1H), 7.47-7.39 (m, 5H), 7.30 (d,  $J = 8.0$  Hz, 2H), 7.09 (d,  $J = 7.0$  Hz, 2H), 7.04 (d,  $J = 8.0$  Hz, 2H), 7.00 (d,  $J = 8.0$  Hz, 2H), 6.87 (s, 1H), 3.94 (s, 2H), 2.47 (s, 3H), 2.37 (s, 3H);  $^{13}\text{C NMR}$  (125 MHz,  $\text{CDCl}_3$ )  $\delta$  145.5, 144.5, 134.3, 133.9, 133.6, 132.4, 130.1, 129.7, 129.3, 129.2, 128.9, 128.8, 128.6, 128.0, 127.9, 127.7, 127.1, 126.2, 125.0, 124.0, 41.6, 21.8, 21.7; HRMS (ESI) calcd for  $\text{C}_{29}\text{H}_{25}\text{Cl}_2\text{N}_2\text{O}_4\text{S}_2[\text{M}+\text{H}]^+$ : 599.0633, found 599.0629.

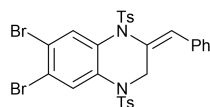

### 3eh

(*E*)-2-benzylidene-6,7-dibromo-1,4-ditosyl-1,2,3,4-tetrahydroquinoxaline **3eh**, white solid, mp 174-175 °C; 109.5 mg, 80% yield;  $R_f = 0.5$  (petroleum ether / EtOAc = 4:1);  $^1\text{H NMR}$  (500 MHz,  $\text{CDCl}_3$ )  $\delta$  8.14 (s, 1H), 8.11 (s, 1H), 7.46-7.40 (m, 5H), 7.30 (d,  $J = 8.5$  Hz, 2H), 7.08 (d,  $J = 7.5$  Hz, 2H), 7.04 (d,  $J = 8.0$  Hz, 2H), 7.00 (d,  $J = 8.5$  Hz, 2H), 6.87 (s, 1H), 3.94 (s, 2H), 2.47 (s, 3H), 2.37 (s, 3H);  $^{13}\text{C NMR}$  (125 MHz,  $\text{CDCl}_3$ )

$\delta$  145.5, 144.5, 134.3, 133.9, 133.6, 132.3, 130.1, 129.7, 129.2, 128.9, 128.8, 128.5, 128.3, 127.9, 127.1, 126.9, 125.0, 121.0, 120.2, 41.6, 21.8, 21.6; HRMS (ESI) calcd for  $C_{29}H_{25}Br_2N_2O_4S_2[M+H]^+$ : 686.9622, found 686.9622.

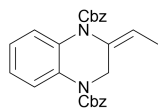

### 3ja

dibenzyl (*E*)-2-ethylidene-2,3-dihydroquinoxaline-1,4-dicarboxylate, oil, 48.9 mg, 57% yield;  $R_f$  = 0.6 (petroleum ether / EtOAc = 5:1);  $^1H$  NMR (500 MHz,  $CDCl_3$ )  $\delta$  7.40-7.31 (m, 12H), 7.14-7.07 (m, 2H), 5.76-5.71 (m, 1H), 5.25 (s, 2H), 5.20 (s, 2H), 4.61 (s, 2H), 1.69 (d,  $J$  = 7.5 Hz, 2H);  $^{13}C$  NMR (125 MHz,  $CDCl_3$ )  $\delta$  154.0, 153.5, 136.1, 135.9, 132.9, 128.6, 128.5, 128.3, 128.2, 128.1, 128.0, 127.8, 125.4, 124.7, 124.5, 68.0, 67.8, 48.1, 12.9; HRMS (ESI) calcd for  $C_{26}H_{24}N_2O_4Na[M+Na]^+$ : 451.1633, found 451.1634.

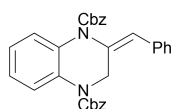

### 3jh

dibenzyl (*E*)-2-benzylidene-2,3-dihydroquinoxaline-1,4-dicarboxylate, oil, 49.7 mg, 51% yield;  $R_f$  = 0.6 (petroleum ether / EtOAc = 5:1);  $^1H$  NMR (600 MHz,  $CDCl_3$ )  $\delta$  7.48-7.46 (m, 1H), 7.36-7.31 (m, 12H), 7.27-7.25 (m, 2H), 7.20 (d,  $J$  = 7.8 Hz, 2H), 7.14-7.12 (m, 2H), 6.78 (s, 1H), 5.26 (s, 2H), 5.24 (s, 2H), 4.87 (s, 2H);  $^{13}C$  NMR (150 MHz,  $CDCl_3$ )  $\delta$  153.4, 135.9, 134.9, 132.7, 128.7, 128.6, 128.5, 128.3, 128.2, 128.1, 127.9, 125.6, 124.7, 68.0; HRMS (ESI) calcd for  $C_{31}H_{27}N_2O_4[M+H]^+$ : 491.1971, found 491.1968.

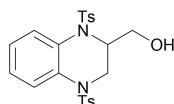

### 4

1,4-ditosyl-1,2,3,4-tetrahydroquinoxalin-2-yl)methanol **4**, oil; 57.7 mg, 61% yield;  $R_f$  = 0.4 (petroleum ether / EtOAc = 3:1);  $^1H$  NMR (600 MHz,  $CDCl_3$ )  $\delta$  7.73 (d,  $J$  = 7.8 Hz, 2H), 7.56 (d,  $J$  = 7.8 Hz, 1H), 7.42-7.38 (m, 4H), 7.17 (d,  $J$  = 7.8 Hz, 2H), 7.00-6.98 (m, 1H), 6.71-6.69 (m, 1H), 6.53 (d,  $J$  = 7.8 Hz, 1H), 4.14-4.11 (m, 1H),

3.53 (m,1H), 3.25-3.22 (m, 1H), 3.14-3.11 (m,1H), 3.05-3.01 (m, 1H), 2.50 (s, 3H), 2.41 (s, 3H);  $^{13}\text{C}$  NMR (100 MHz,  $\text{CDCl}_3$ )  $\delta$  145.5, 144.0, 136.4, 136.2, 135.9, 130.2, 129.8, 127.9, 127.1, 117.9, 115.2, 58.9, 48.3, 43.2, 21.8, 21.6; HRMS (ESI) calcd for  $\text{C}_{23}\text{H}_{24}\text{N}_2\text{O}_5\text{S}_2[\text{M}+\text{Na}]^+$ : 495.1024, found 495.0816.

## 7. X-Ray crystallographic data of 3af.

The relative configuration 3af was determined by X-ray single crystal diffraction analysis. CCDC 2208884 (3af) contain the supplementary crystallographic data for this paper. X-Ray Crystallography Data for 3af (CCDC 2208884): A colorless crystal suitable for X-ray crystallography was obtained from a petroleum ether/dichloromethane solution at room temperature under air.

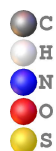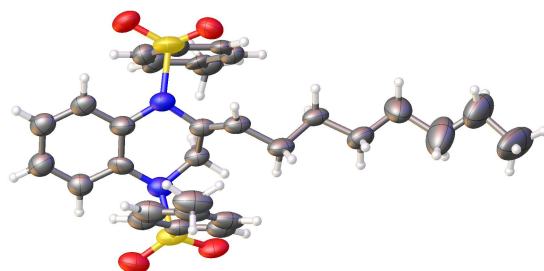

**3af**

Bond precision: = 0.0000 Å

Wavelength=1.54184

Cell: a=9.8087(3) b=10.6541(4) c=14.2276(4)

alpha=75.029(3) beta=87.646(2) gamma=77.962(3)

Temperature: 100 K

|             | Calculated | Reported   |
|-------------|------------|------------|
| Volume      | 1404.64(8) | 1404.64(8) |
| Space group | P -1       | P -1       |
| Hall group  | -P 1       | -P 1       |



|                                                               |                                                                              |                                                                                  |
|---------------------------------------------------------------|------------------------------------------------------------------------------|----------------------------------------------------------------------------------|
| Moiety formula                                                | C <sub>30</sub> H <sub>36</sub> N <sub>2</sub> O <sub>4</sub> S <sub>2</sub> | 1(C <sub>30</sub> H <sub>36</sub> N <sub>2</sub> O <sub>4</sub> S <sub>2</sub> ) |
| Sum formula                                                   | C <sub>30</sub> H <sub>36</sub> N <sub>2</sub> O <sub>4</sub> S <sub>2</sub> | C <sub>30</sub> H <sub>36</sub> N <sub>2</sub> O <sub>4</sub> S <sub>2</sub>     |
| Mr                                                            | 552.73                                                                       | 552.73                                                                           |
| Dx,g cm-3                                                     | 1.307                                                                        | 1.307                                                                            |
| Z                                                             | 2                                                                            | 2                                                                                |
| Mu (mm-1)                                                     | 2.025                                                                        | 2.025                                                                            |
| F000                                                          | 588.0                                                                        | 588.0                                                                            |
| F000'                                                         | 590.87                                                                       |                                                                                  |
| h,k,lmax                                                      | 12,13,17                                                                     | 12,13,17                                                                         |
| Nref                                                          | 5737                                                                         | 5635                                                                             |
| Tmin,Tmax                                                     | 0.747,0.904                                                                  | 0.699,1.000                                                                      |
| Tmin'                                                         | 0.567                                                                        |                                                                                  |
| Correction method= # Reported T Limits: Tmin=0.699 Tmax=1.000 |                                                                              |                                                                                  |
| AbsCorr = MULTI-SCAN                                          |                                                                              |                                                                                  |
| Data completeness= 0.982                                      | Theta(max)= 74.503                                                           |                                                                                  |
| R(reflections) = 0.0734( 4916)                                | wR2(reflections)= 0.1943( 5635)                                              |                                                                                  |
| S = 1.105                                                     | Npar= 620                                                                    |                                                                                  |

## 8. References

- [1] D. Wang, H. Yu, S. Sun, and F. Zhong, *Org. Lett.*, **2020**, *22*, 2425-2430.
- [2] Z. Wu, K. Wen, J. Zhang and W. Zhang, *Org. Lett.*, **2017**, *19*, 2813-2816.
- [3] B. Deng, C. B. Rao, R. Zhang, J. Li, Y. Liang, Y. Zhao, M. Gao and D. W. Dong, *Adv. Synth. Catal.*, **2019**, *19*, 4549-4557.
- [4] Y.-M. Zhou, Y. Chen, Y. Huang, *Org. Lett.*, **2020**, *22*, 5941-5946.
- [5] Y.-M. Zhou, N, Li, W. Cai, Y. Huang, *Org. Lett.*, **2021**, *23*, 8755-8760.

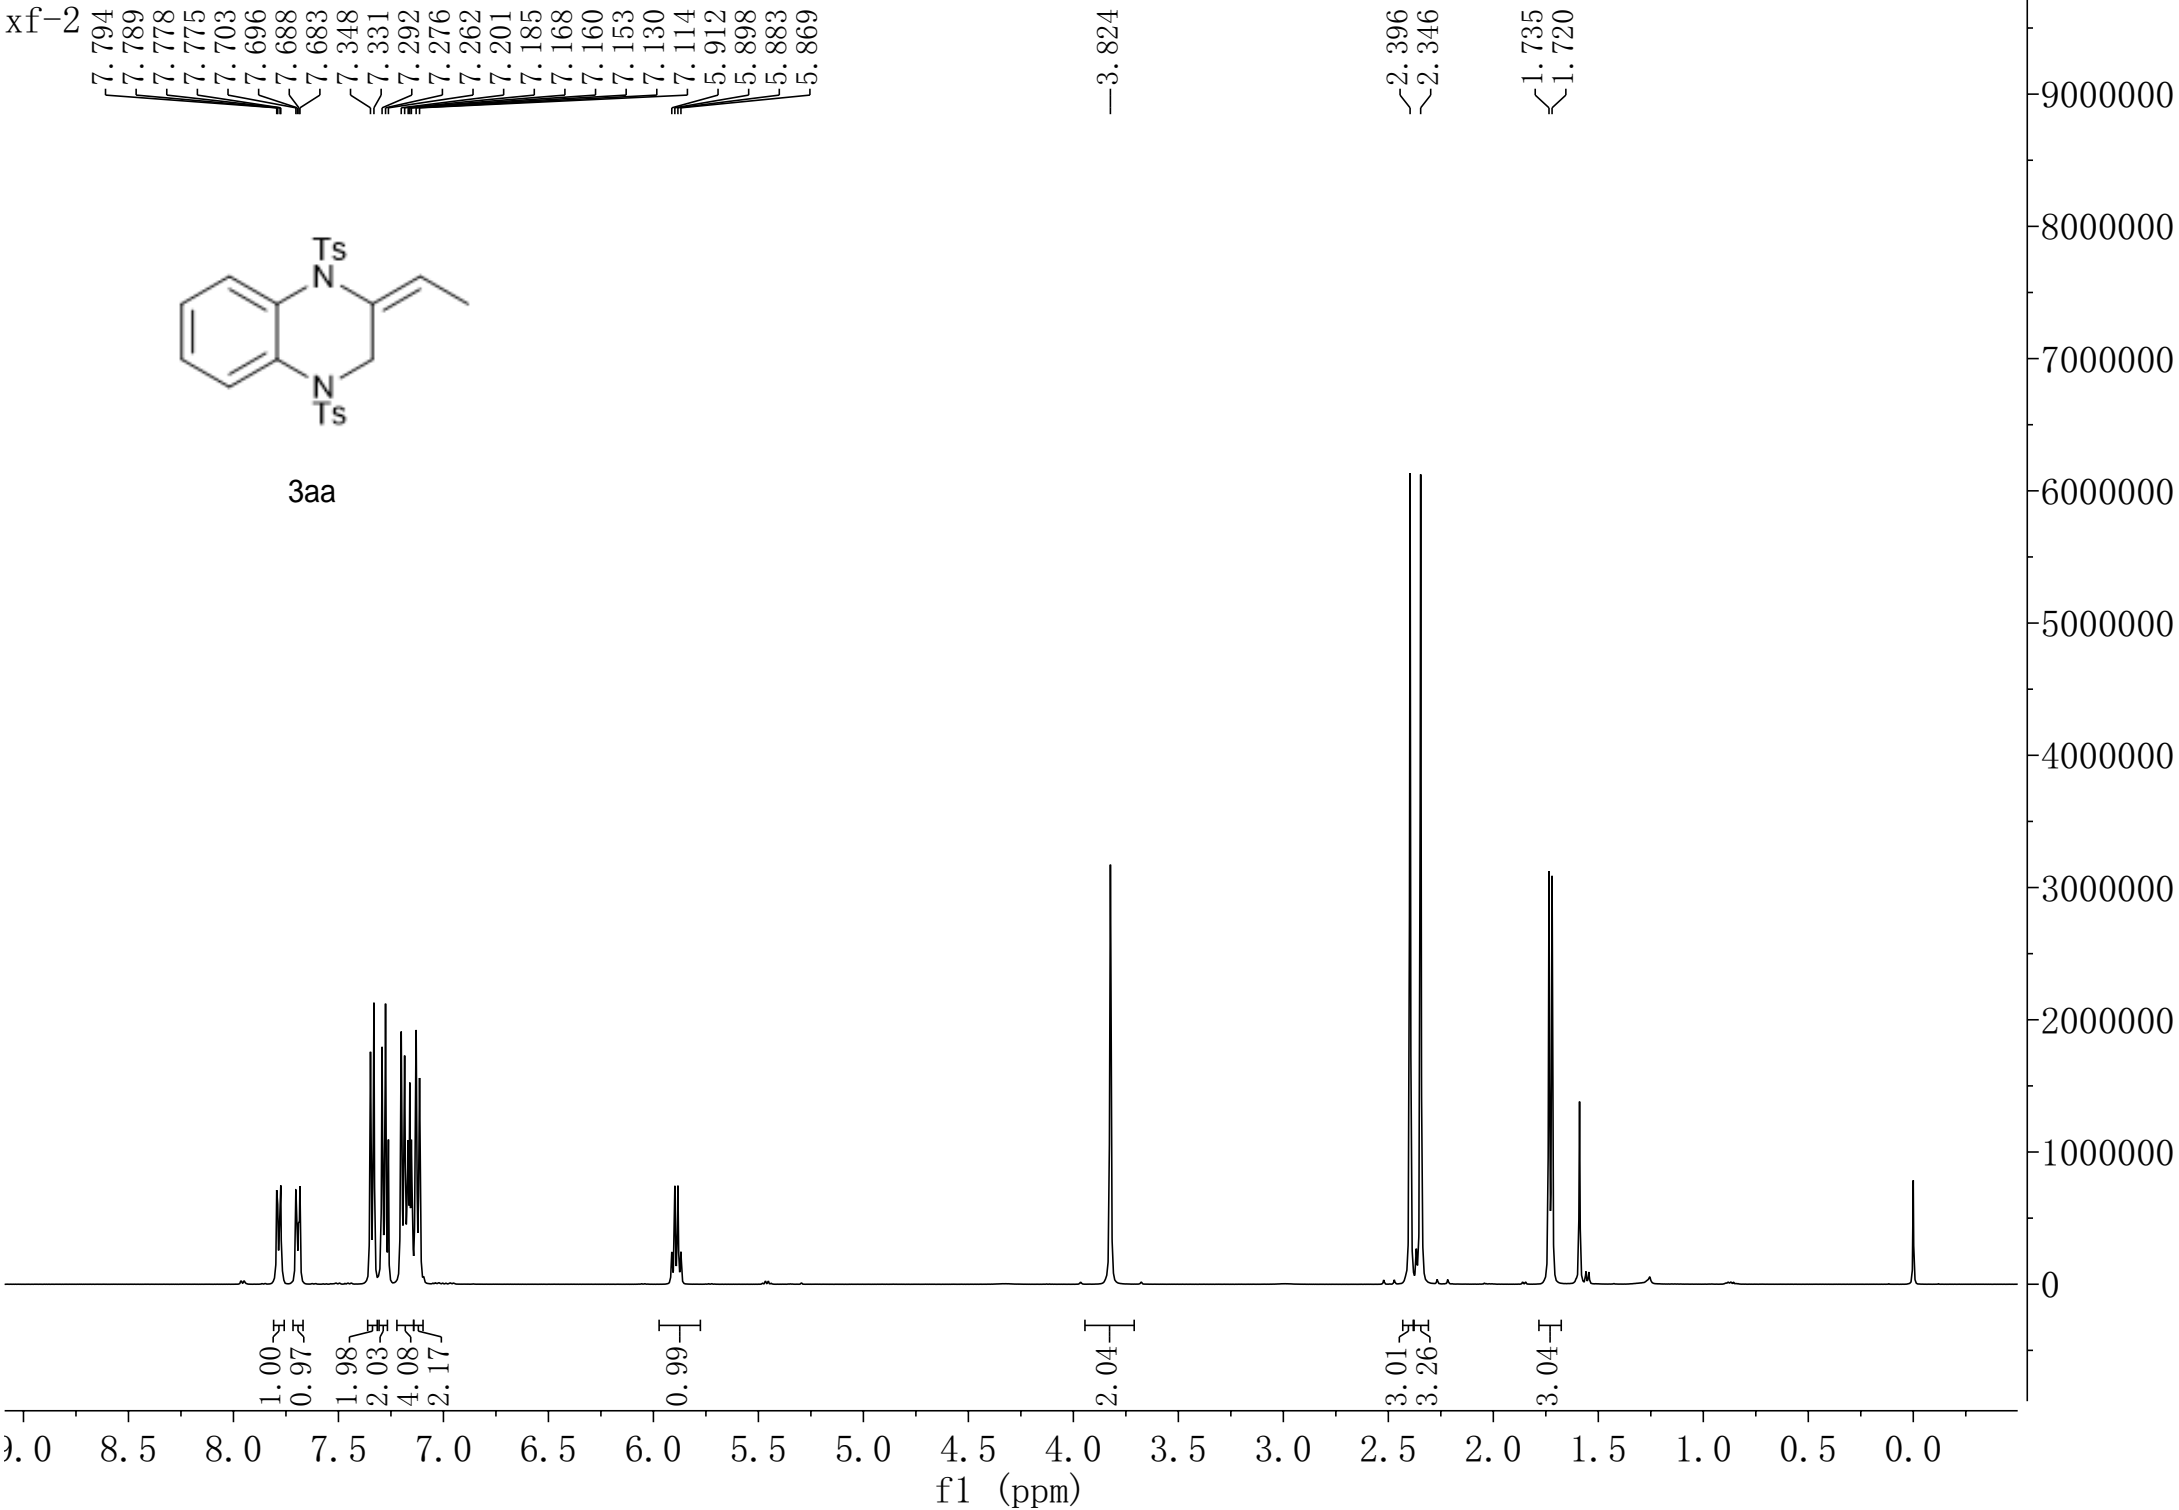

xf-2

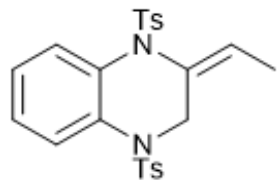

3aa

144.6  
144.1  
135.5  
134.6  
129.8  
129.5  
129.4  
127.6  
127.1  
126.7  
125.8  
125.6  
125.1  
122.8

42.6

21.6  
21.5

13.4

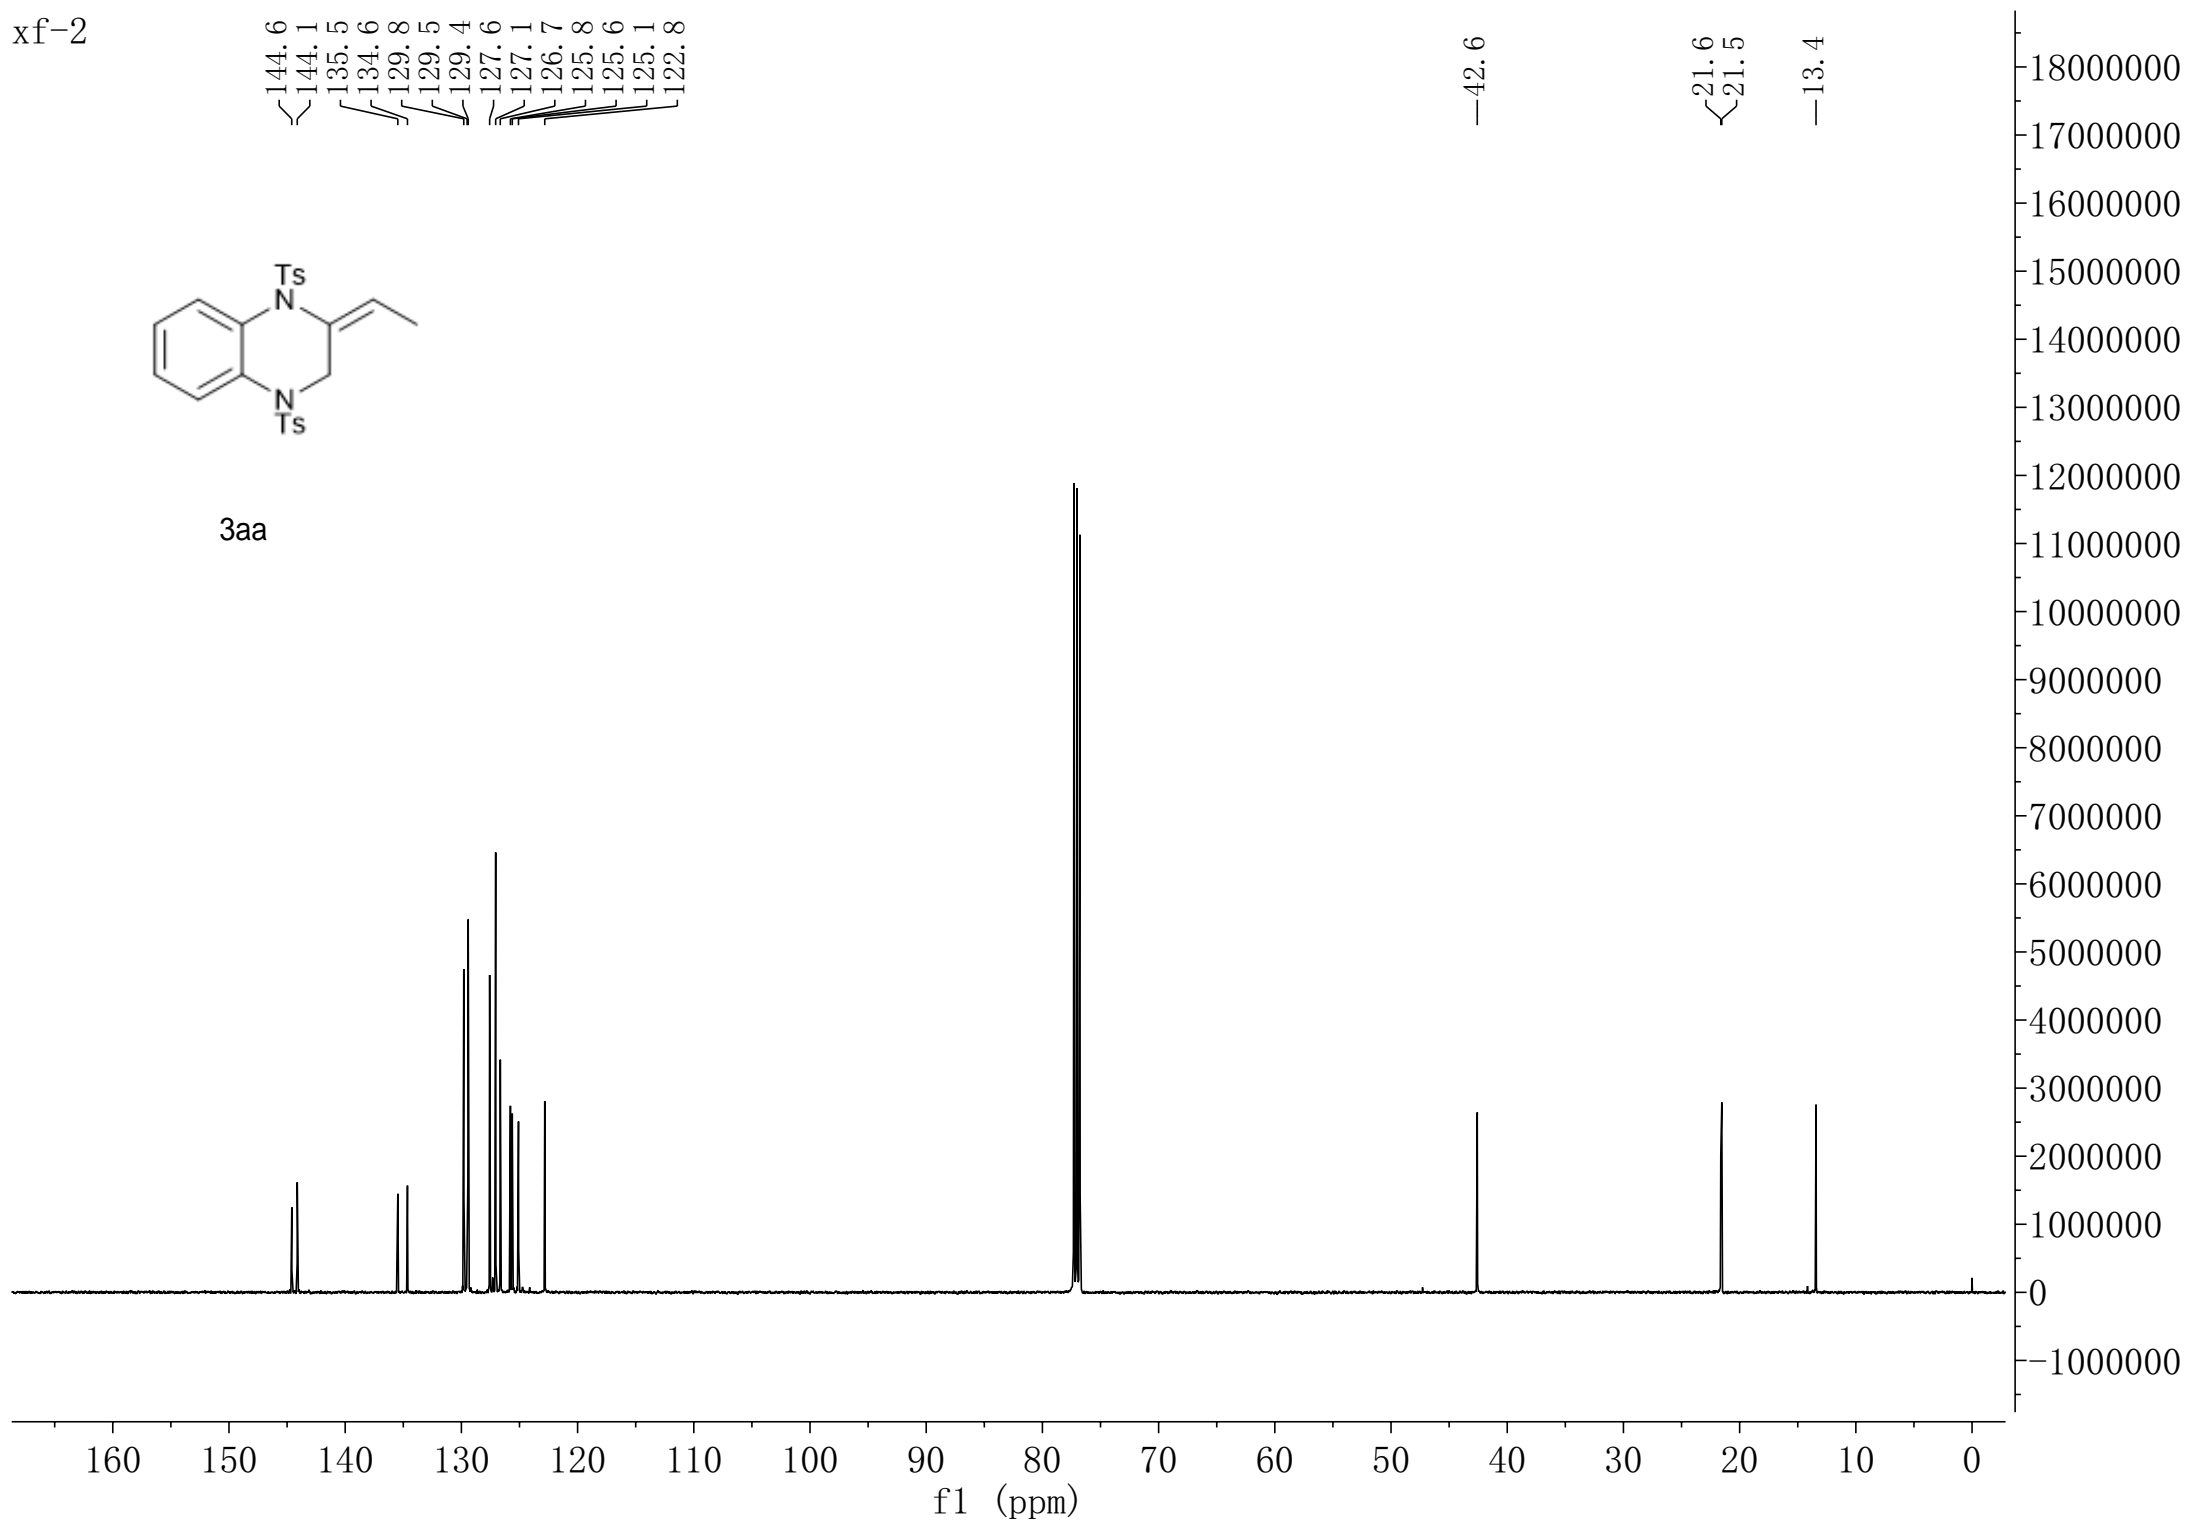

xf-5

7.543  
7.460  
7.358  
7.342  
7.295  
7.278  
7.262  
7.201  
7.185  
7.133  
7.116

5.858  
5.844  
5.829  
5.815

-3.761

2.396  
2.348  
2.262  
2.235

1.691  
1.676

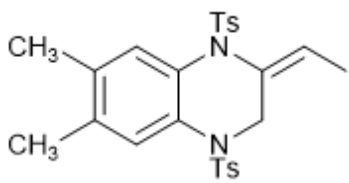

3ba

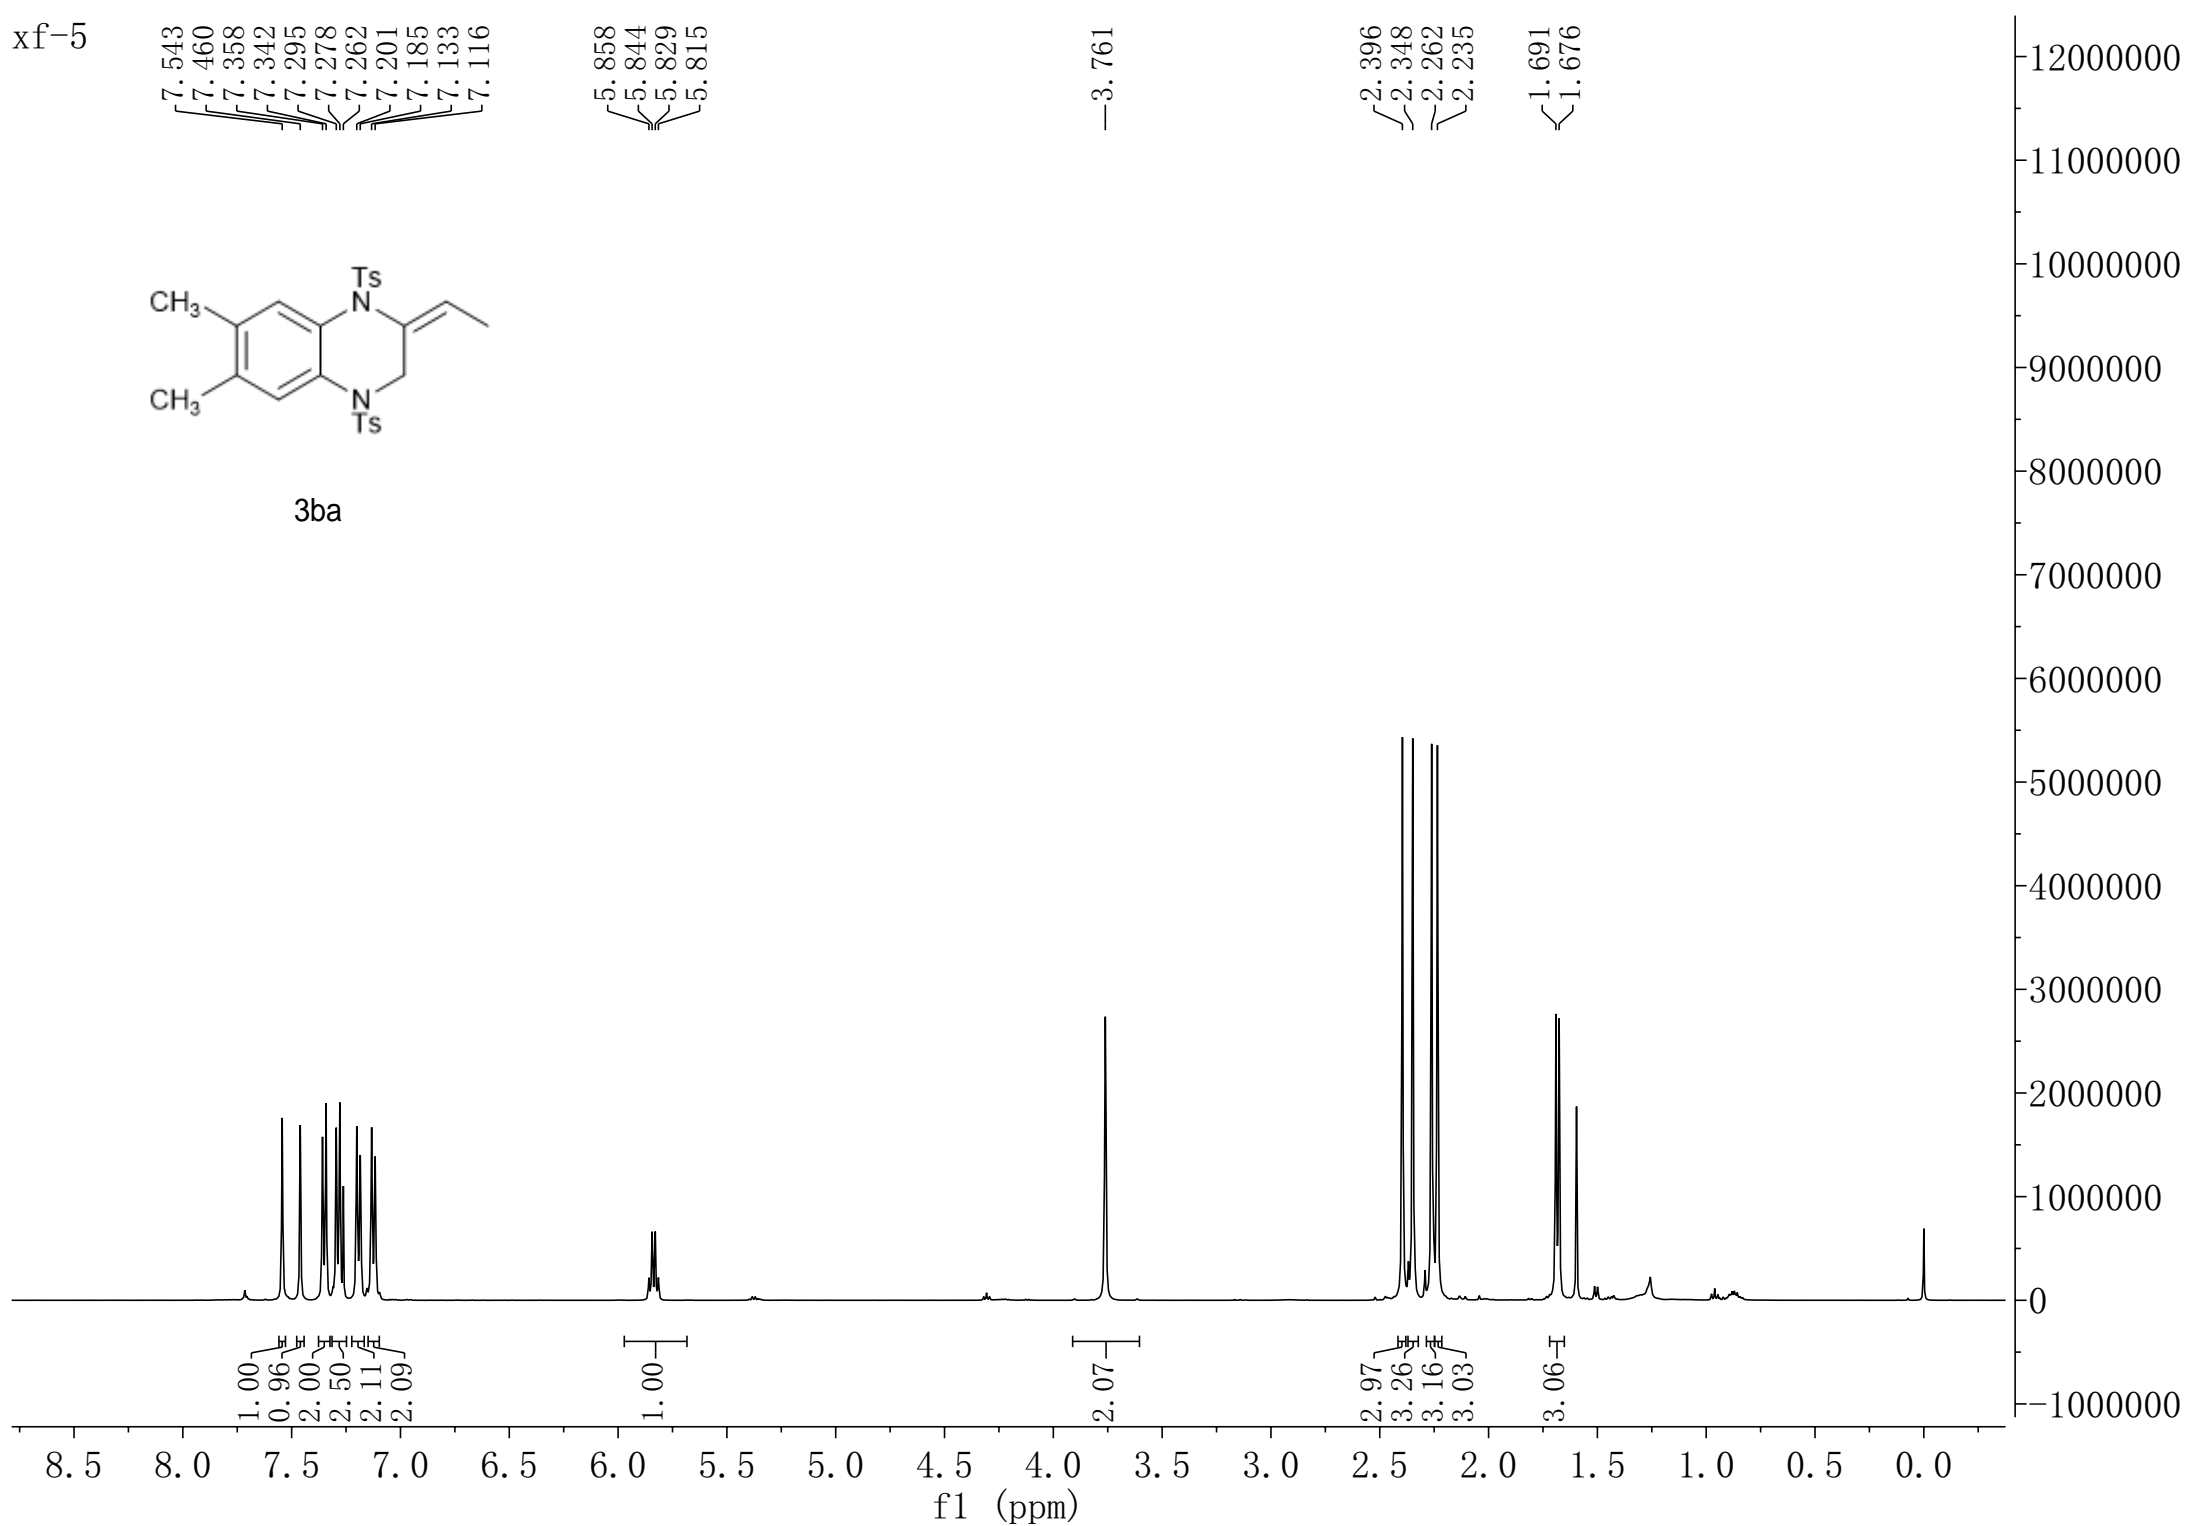

xf-5

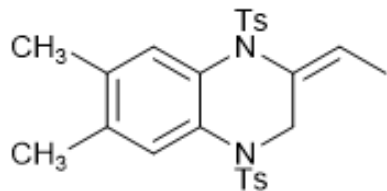

3ba

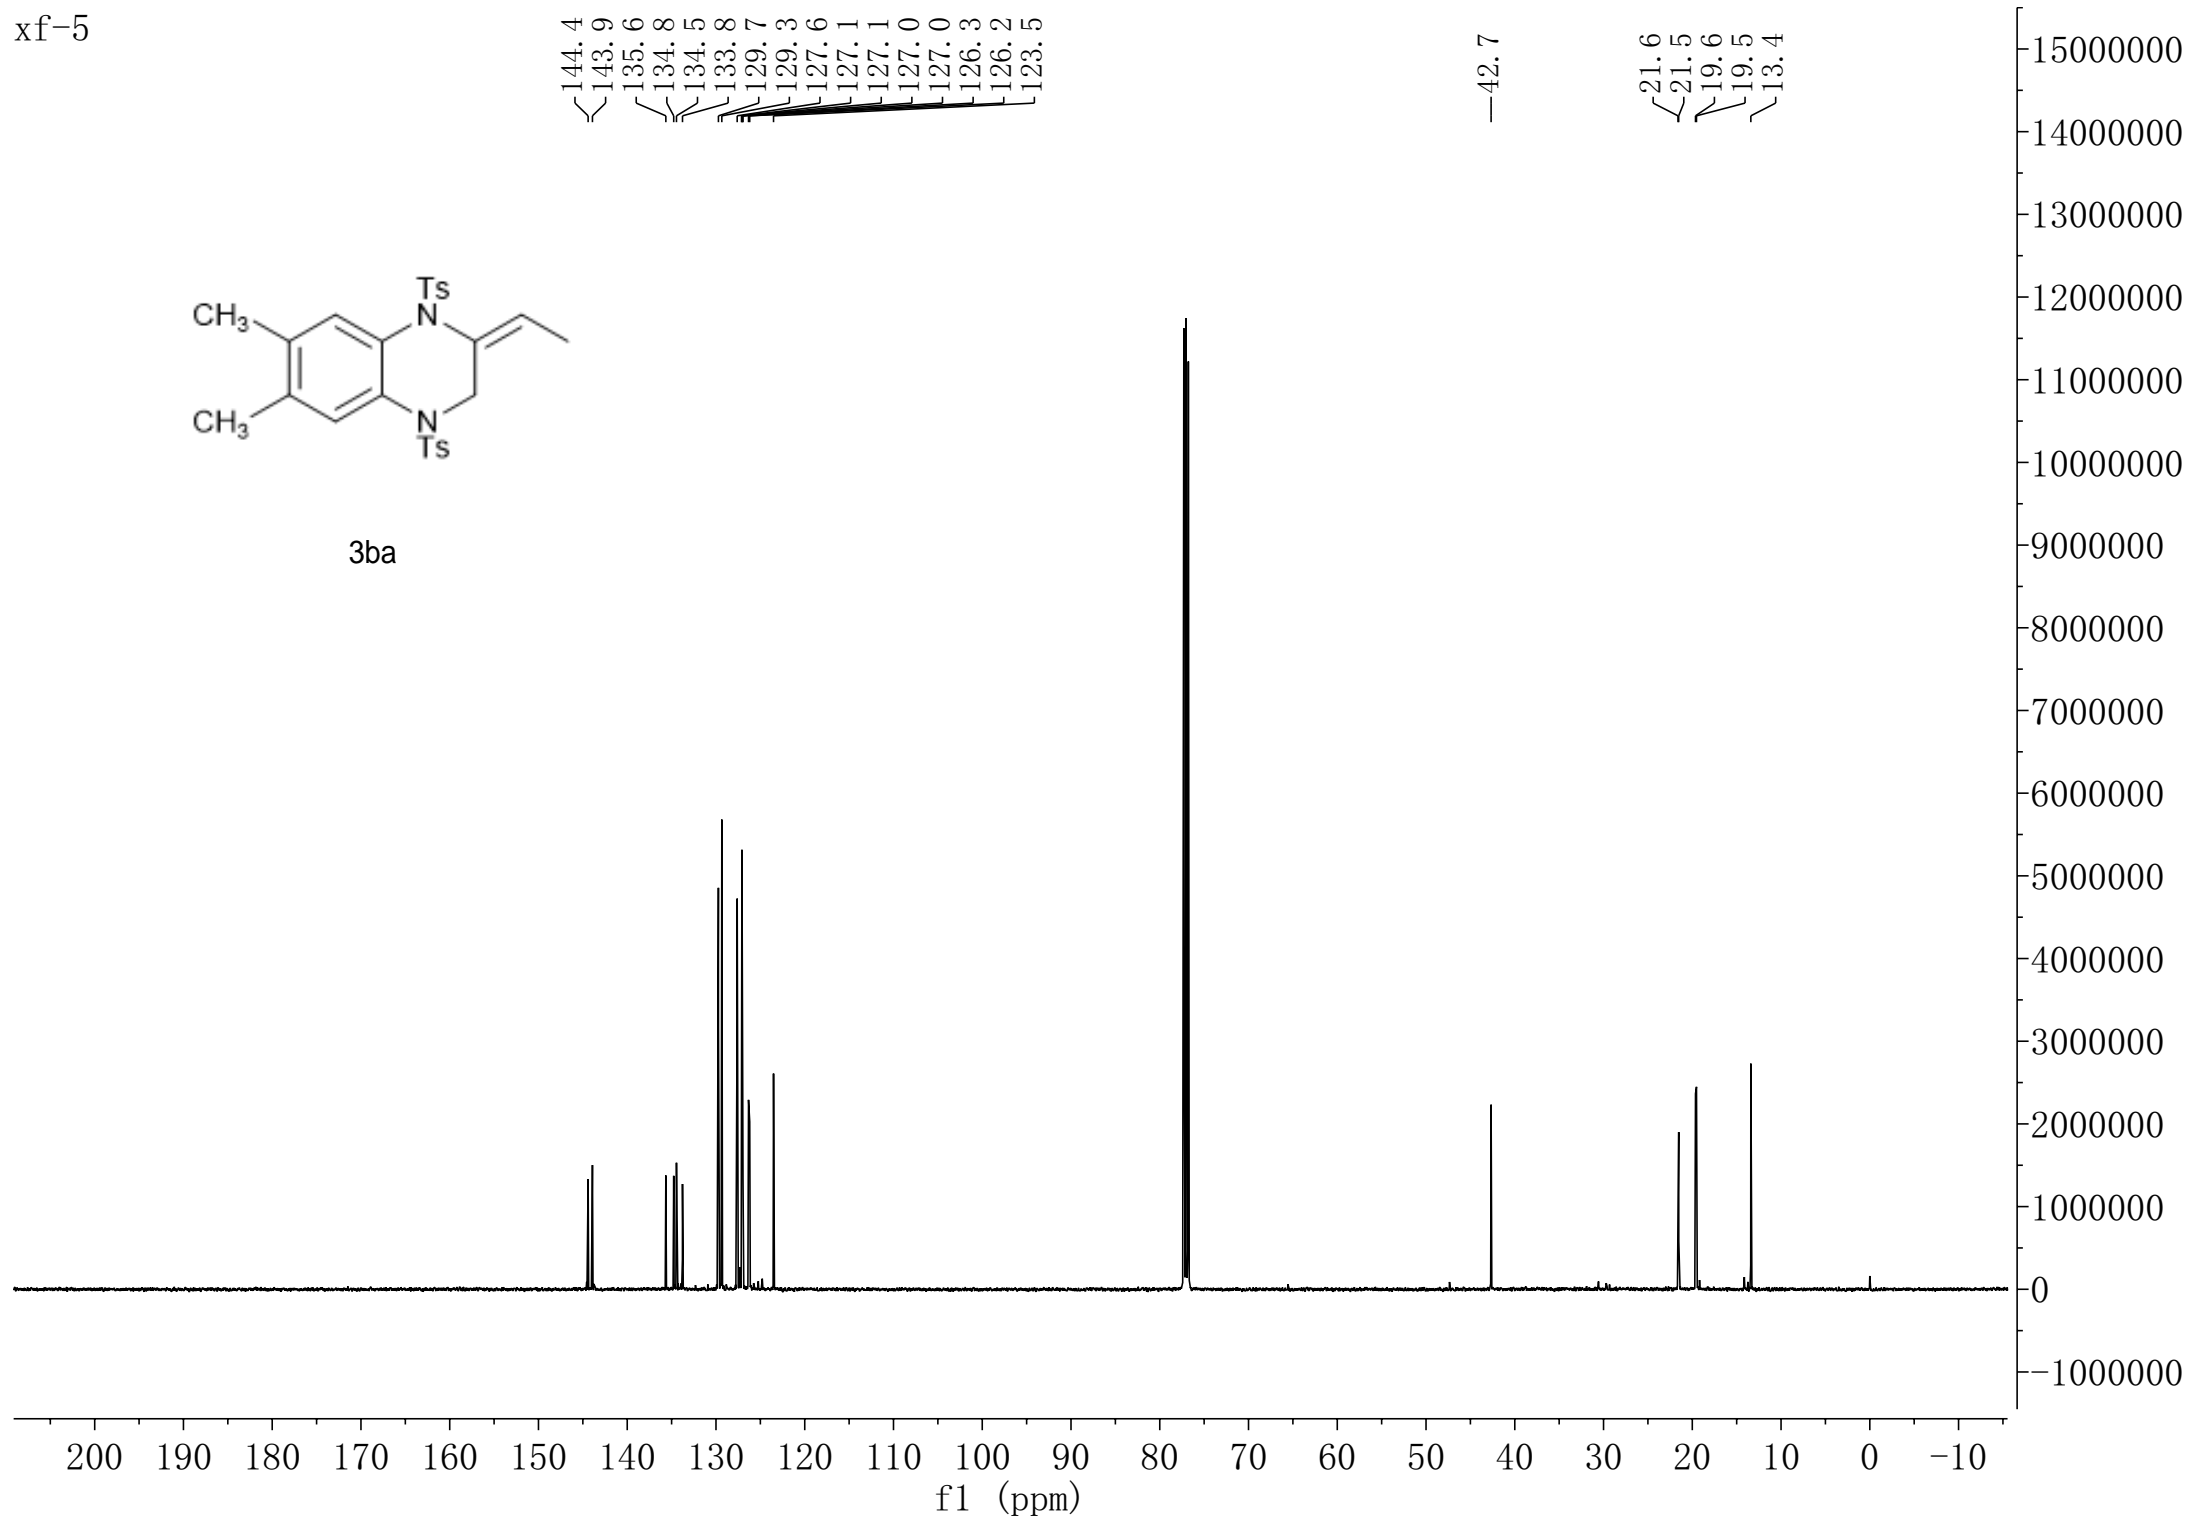

xf-18

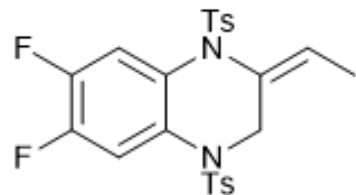

3ca

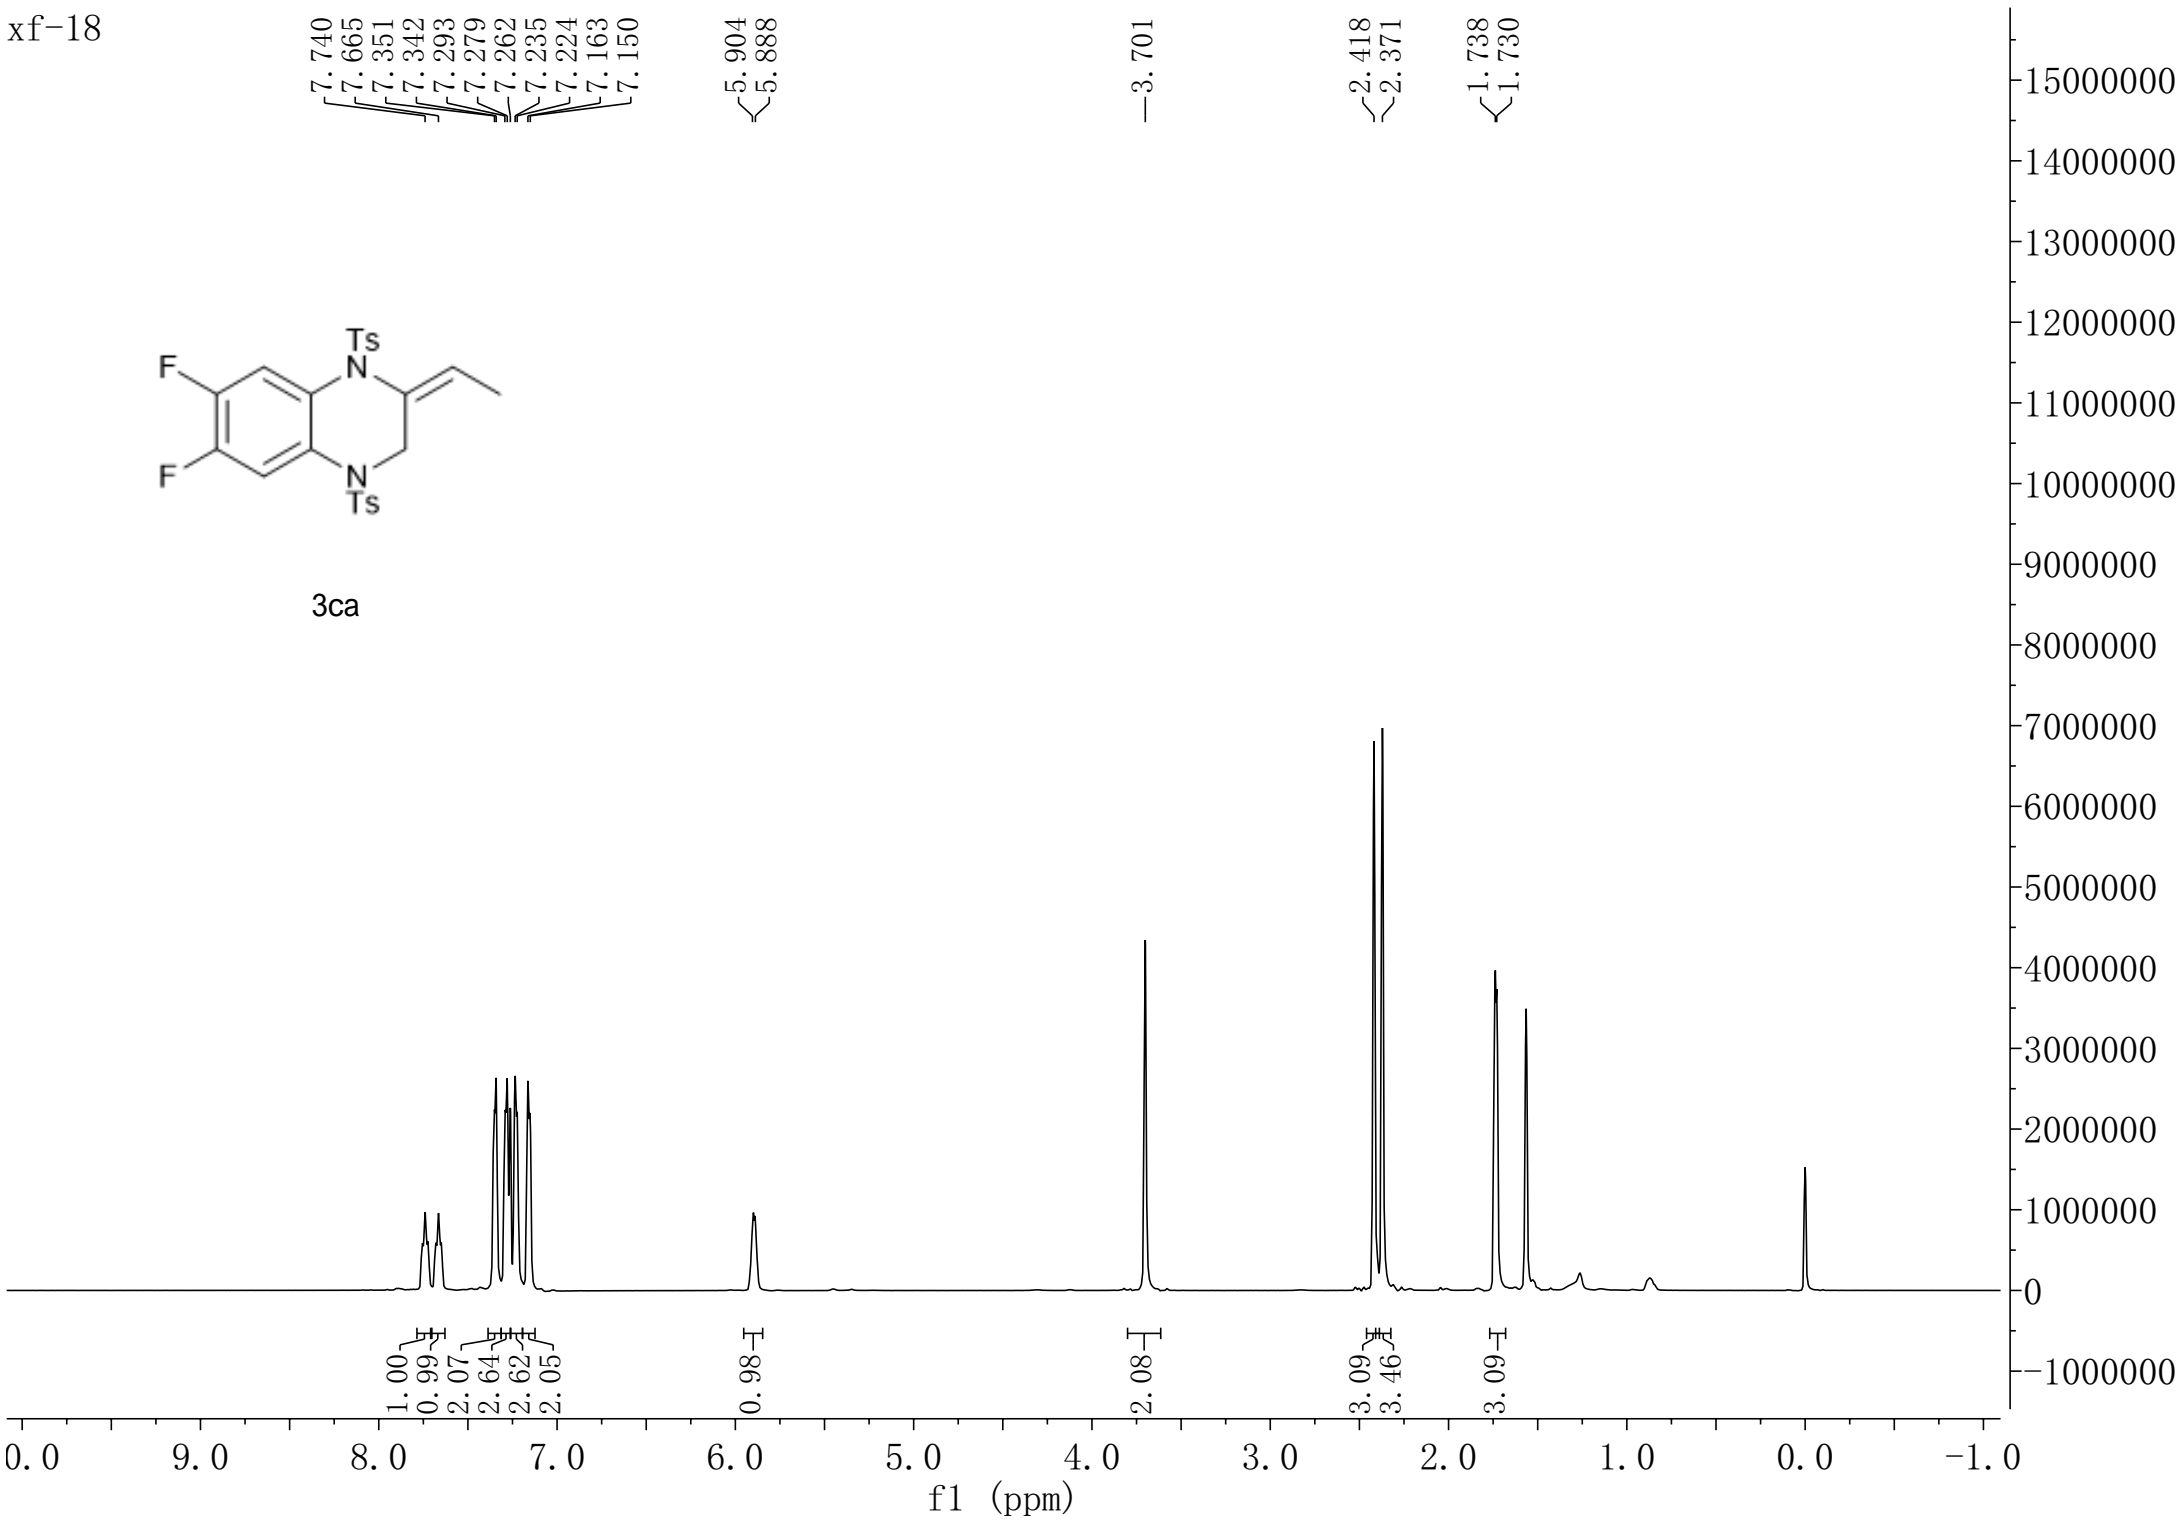

xf-18

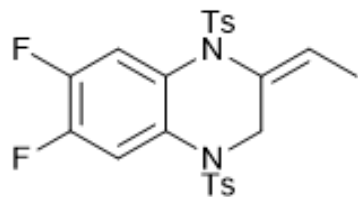

3ca

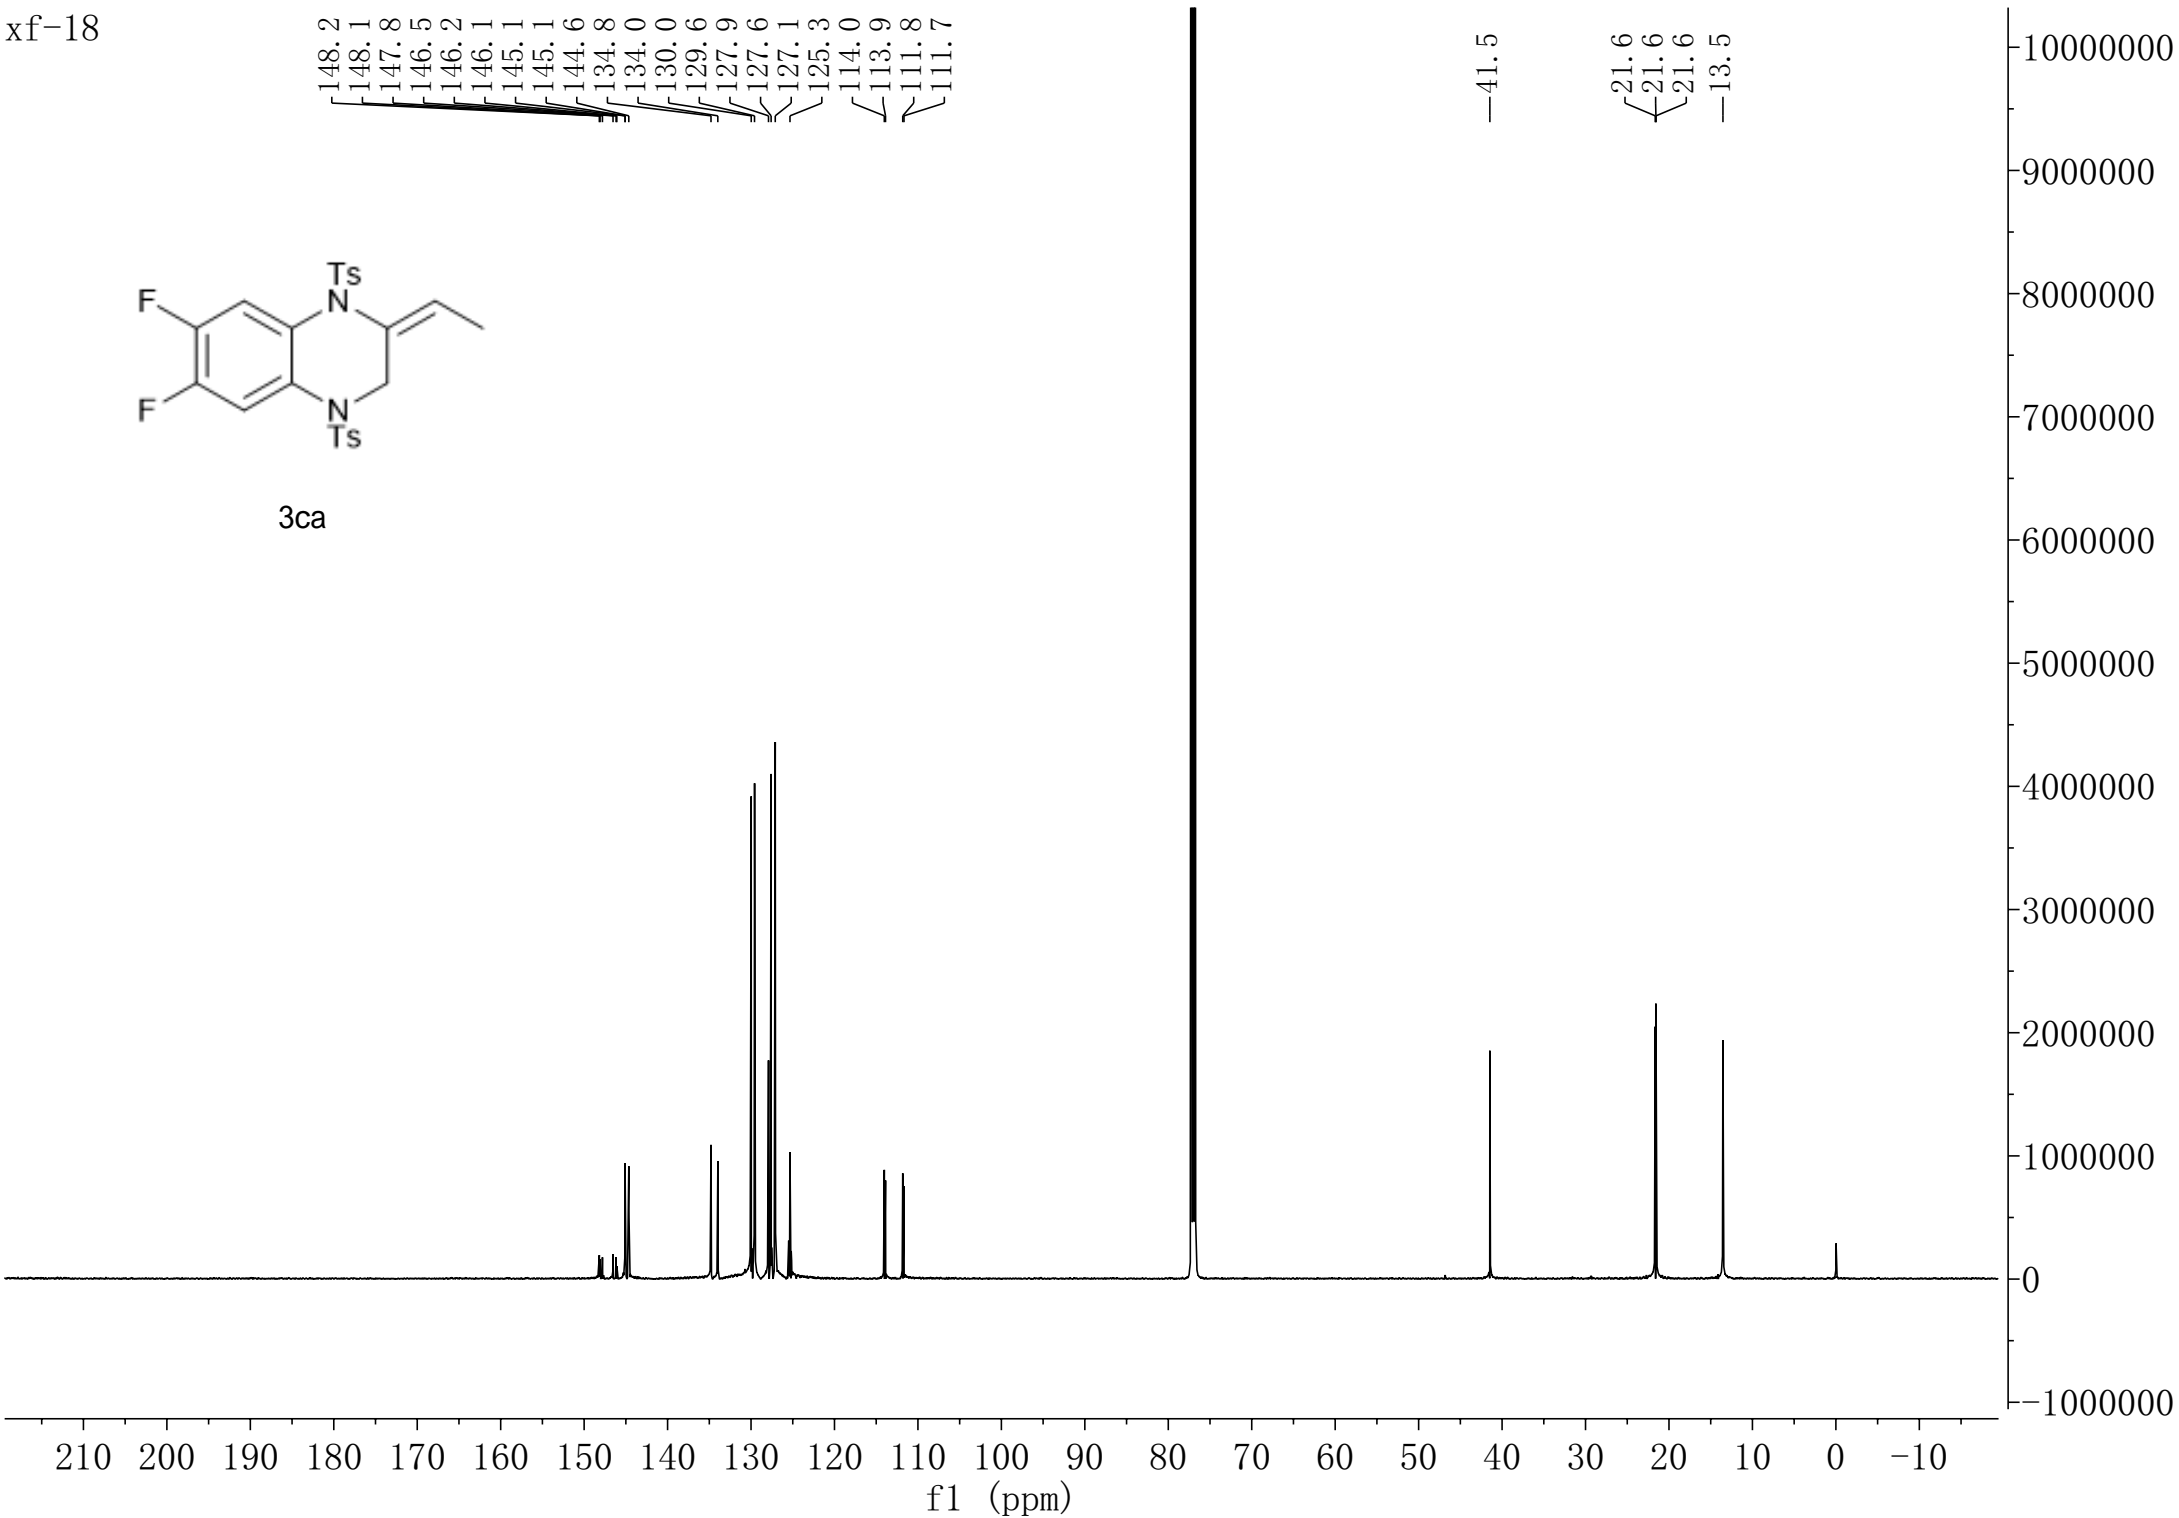

xf-18

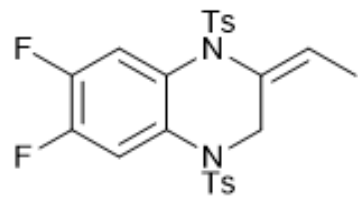

3ca

138.20  
138.33

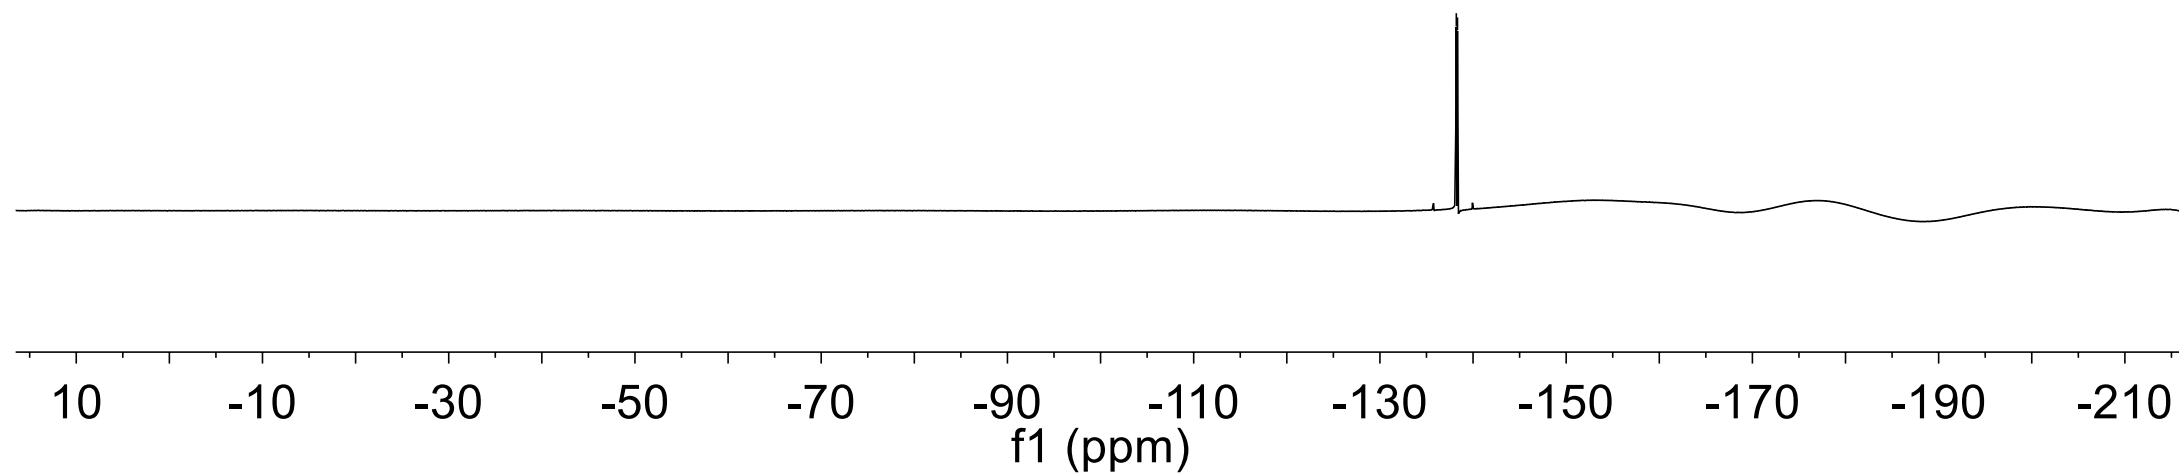



xf-19

7.952  
7.902  
7.370  
7.362  
7.312  
7.304  
7.263  
7.240  
7.231  
7.173  
7.165

5.915  
5.908

3.719

2.424  
2.377

1.739  
1.725  
1.568

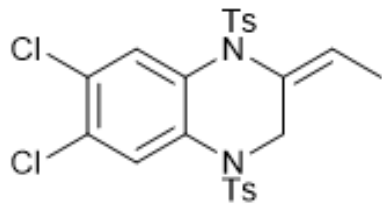

3da

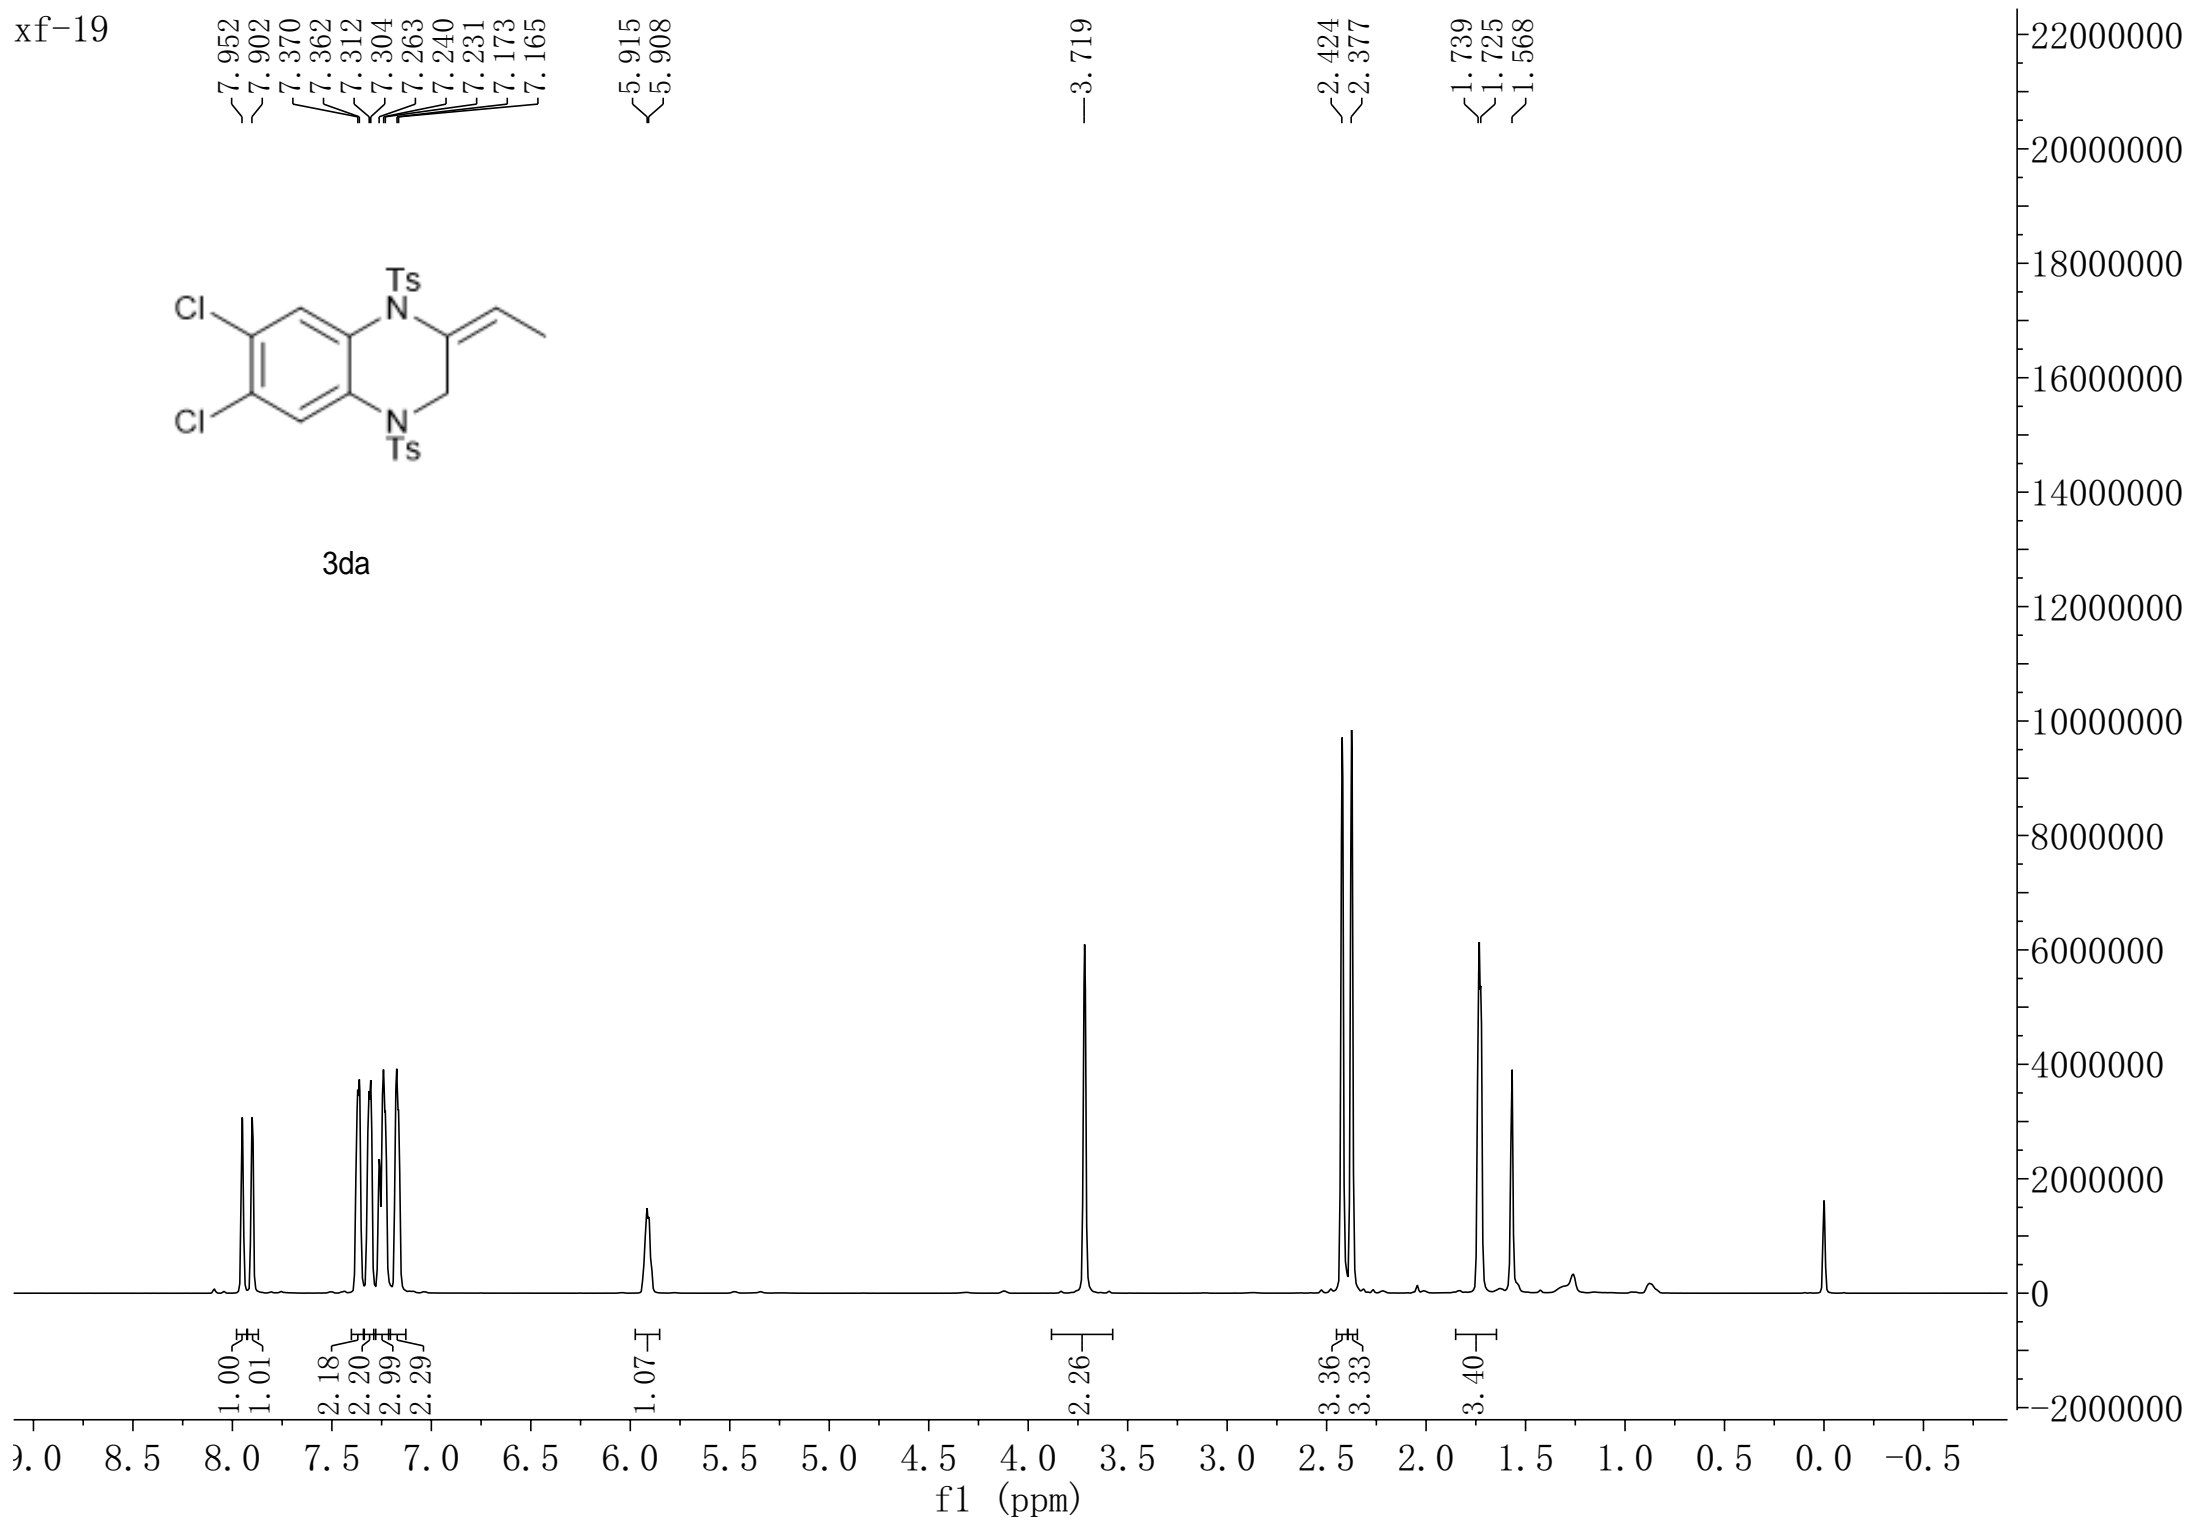

xf-19

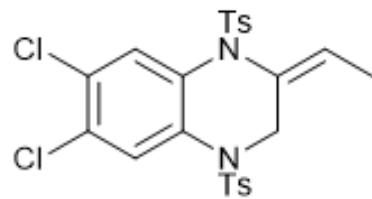

3da

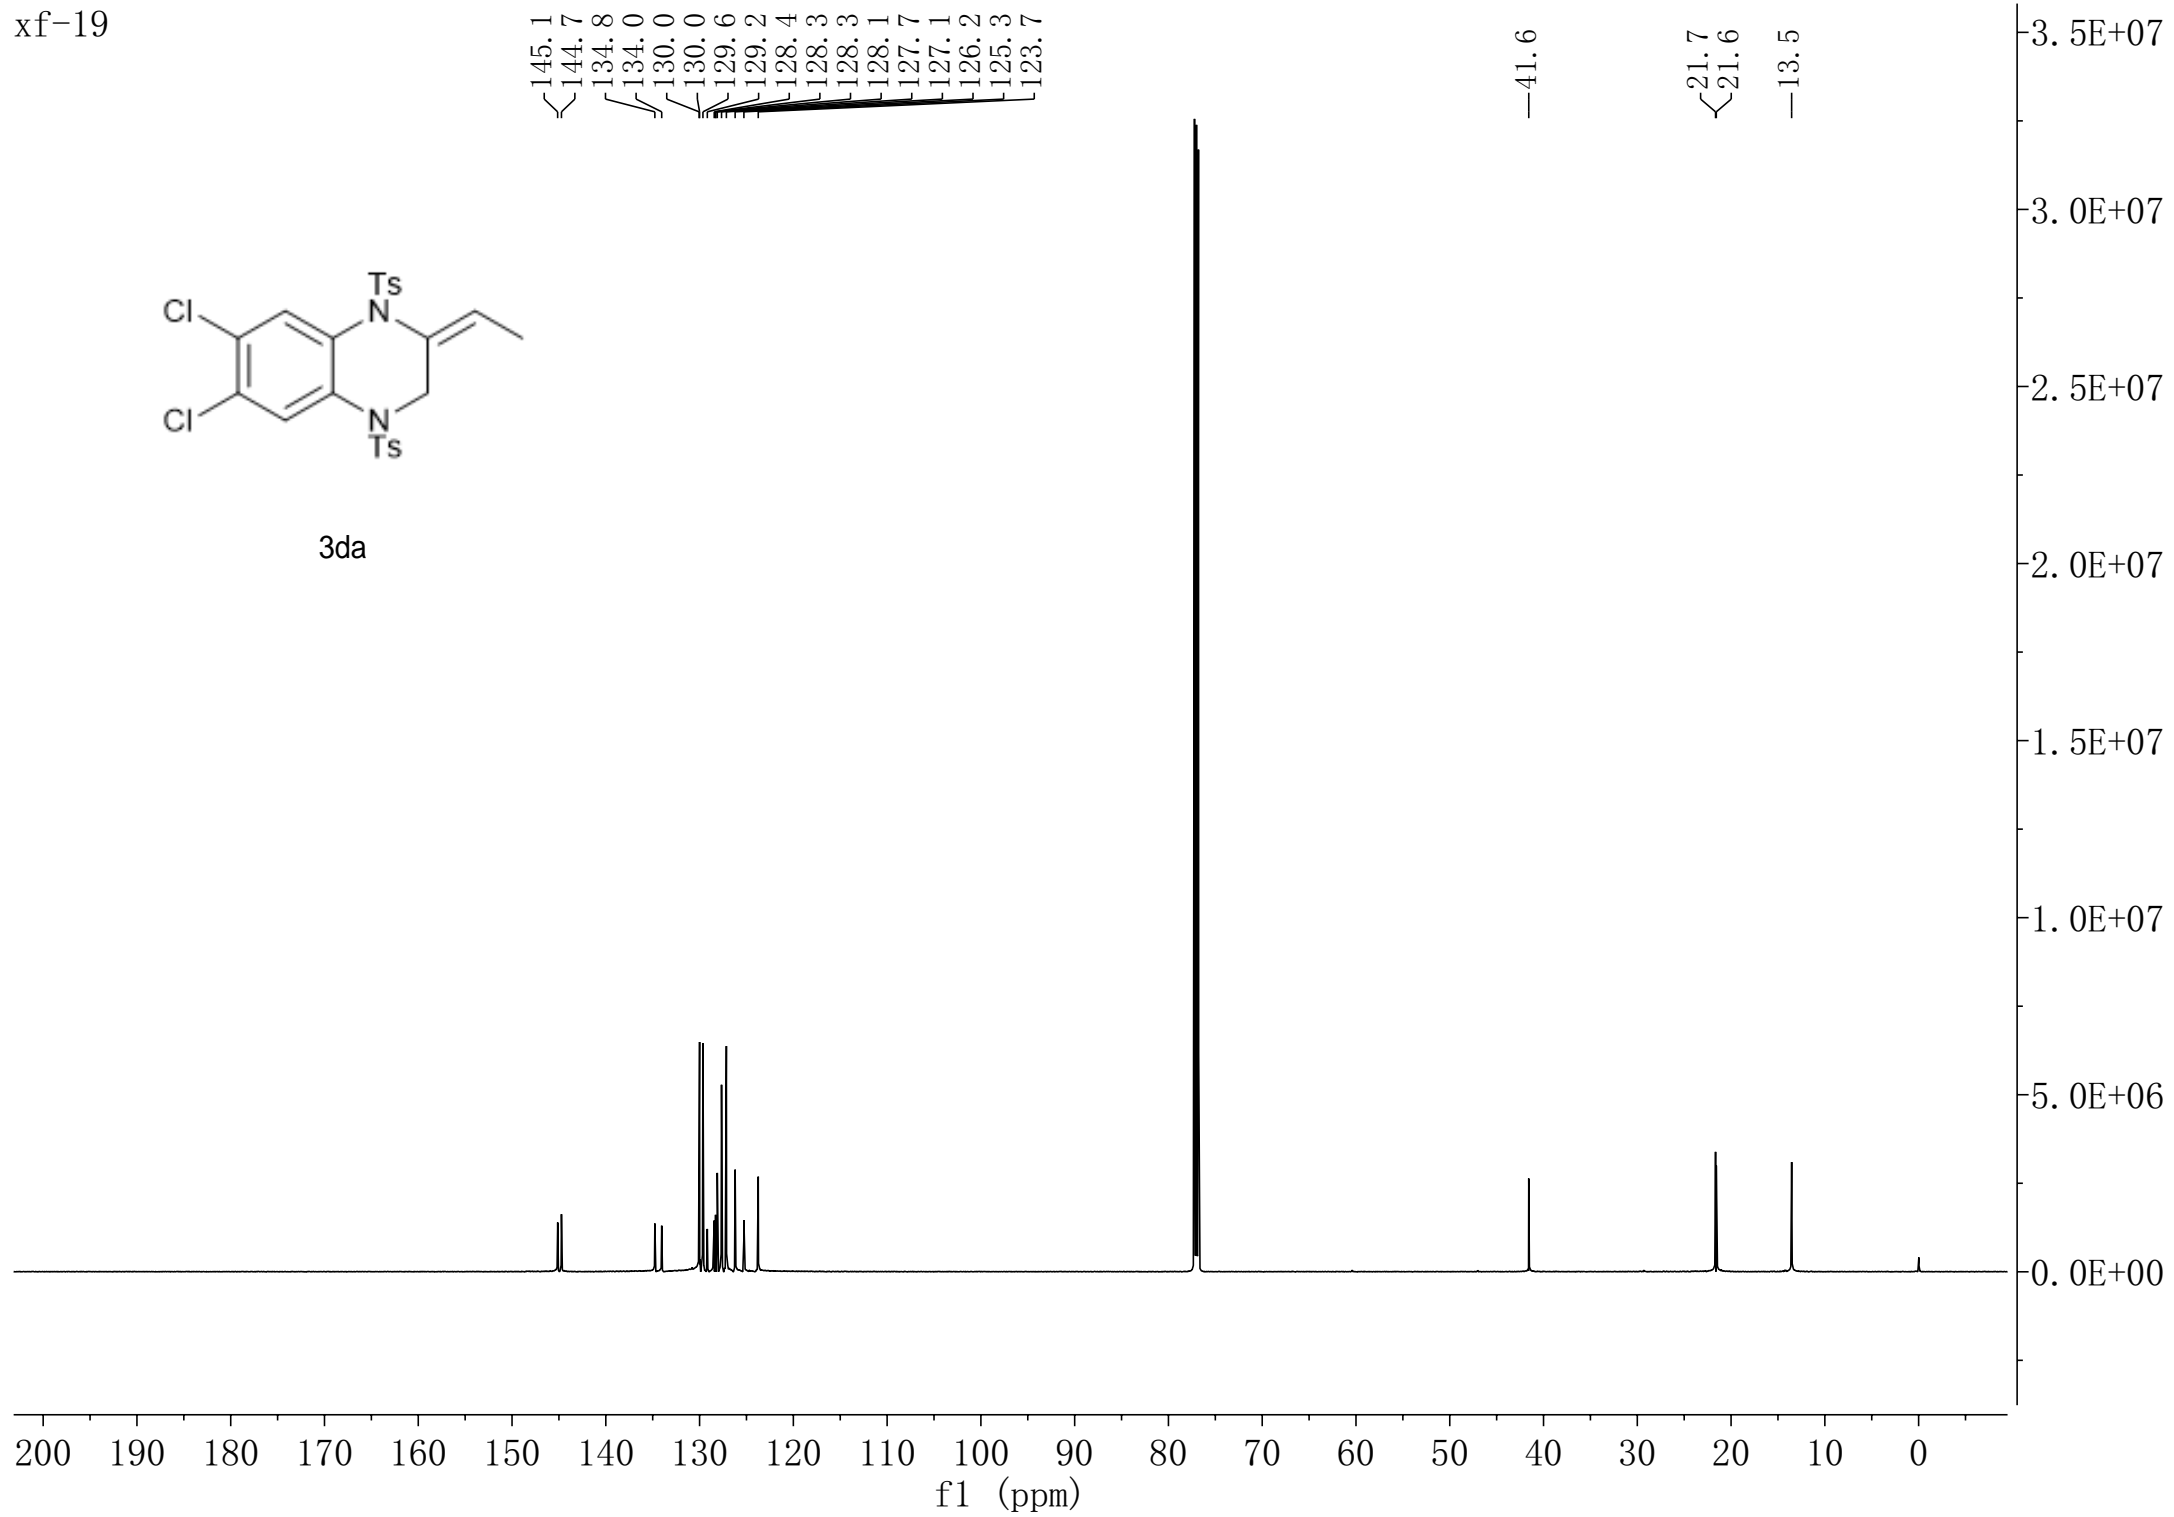

xf-17

8.085  
8.045  
7.382  
7.365  
7.324  
7.307  
7.250  
7.233  
7.185  
7.168

5.936  
5.922  
5.907  
5.892

-3.714

1.737  
1.722

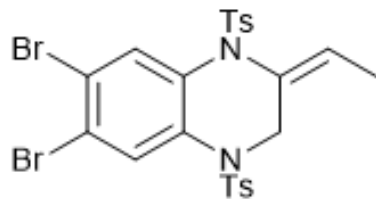

3ea

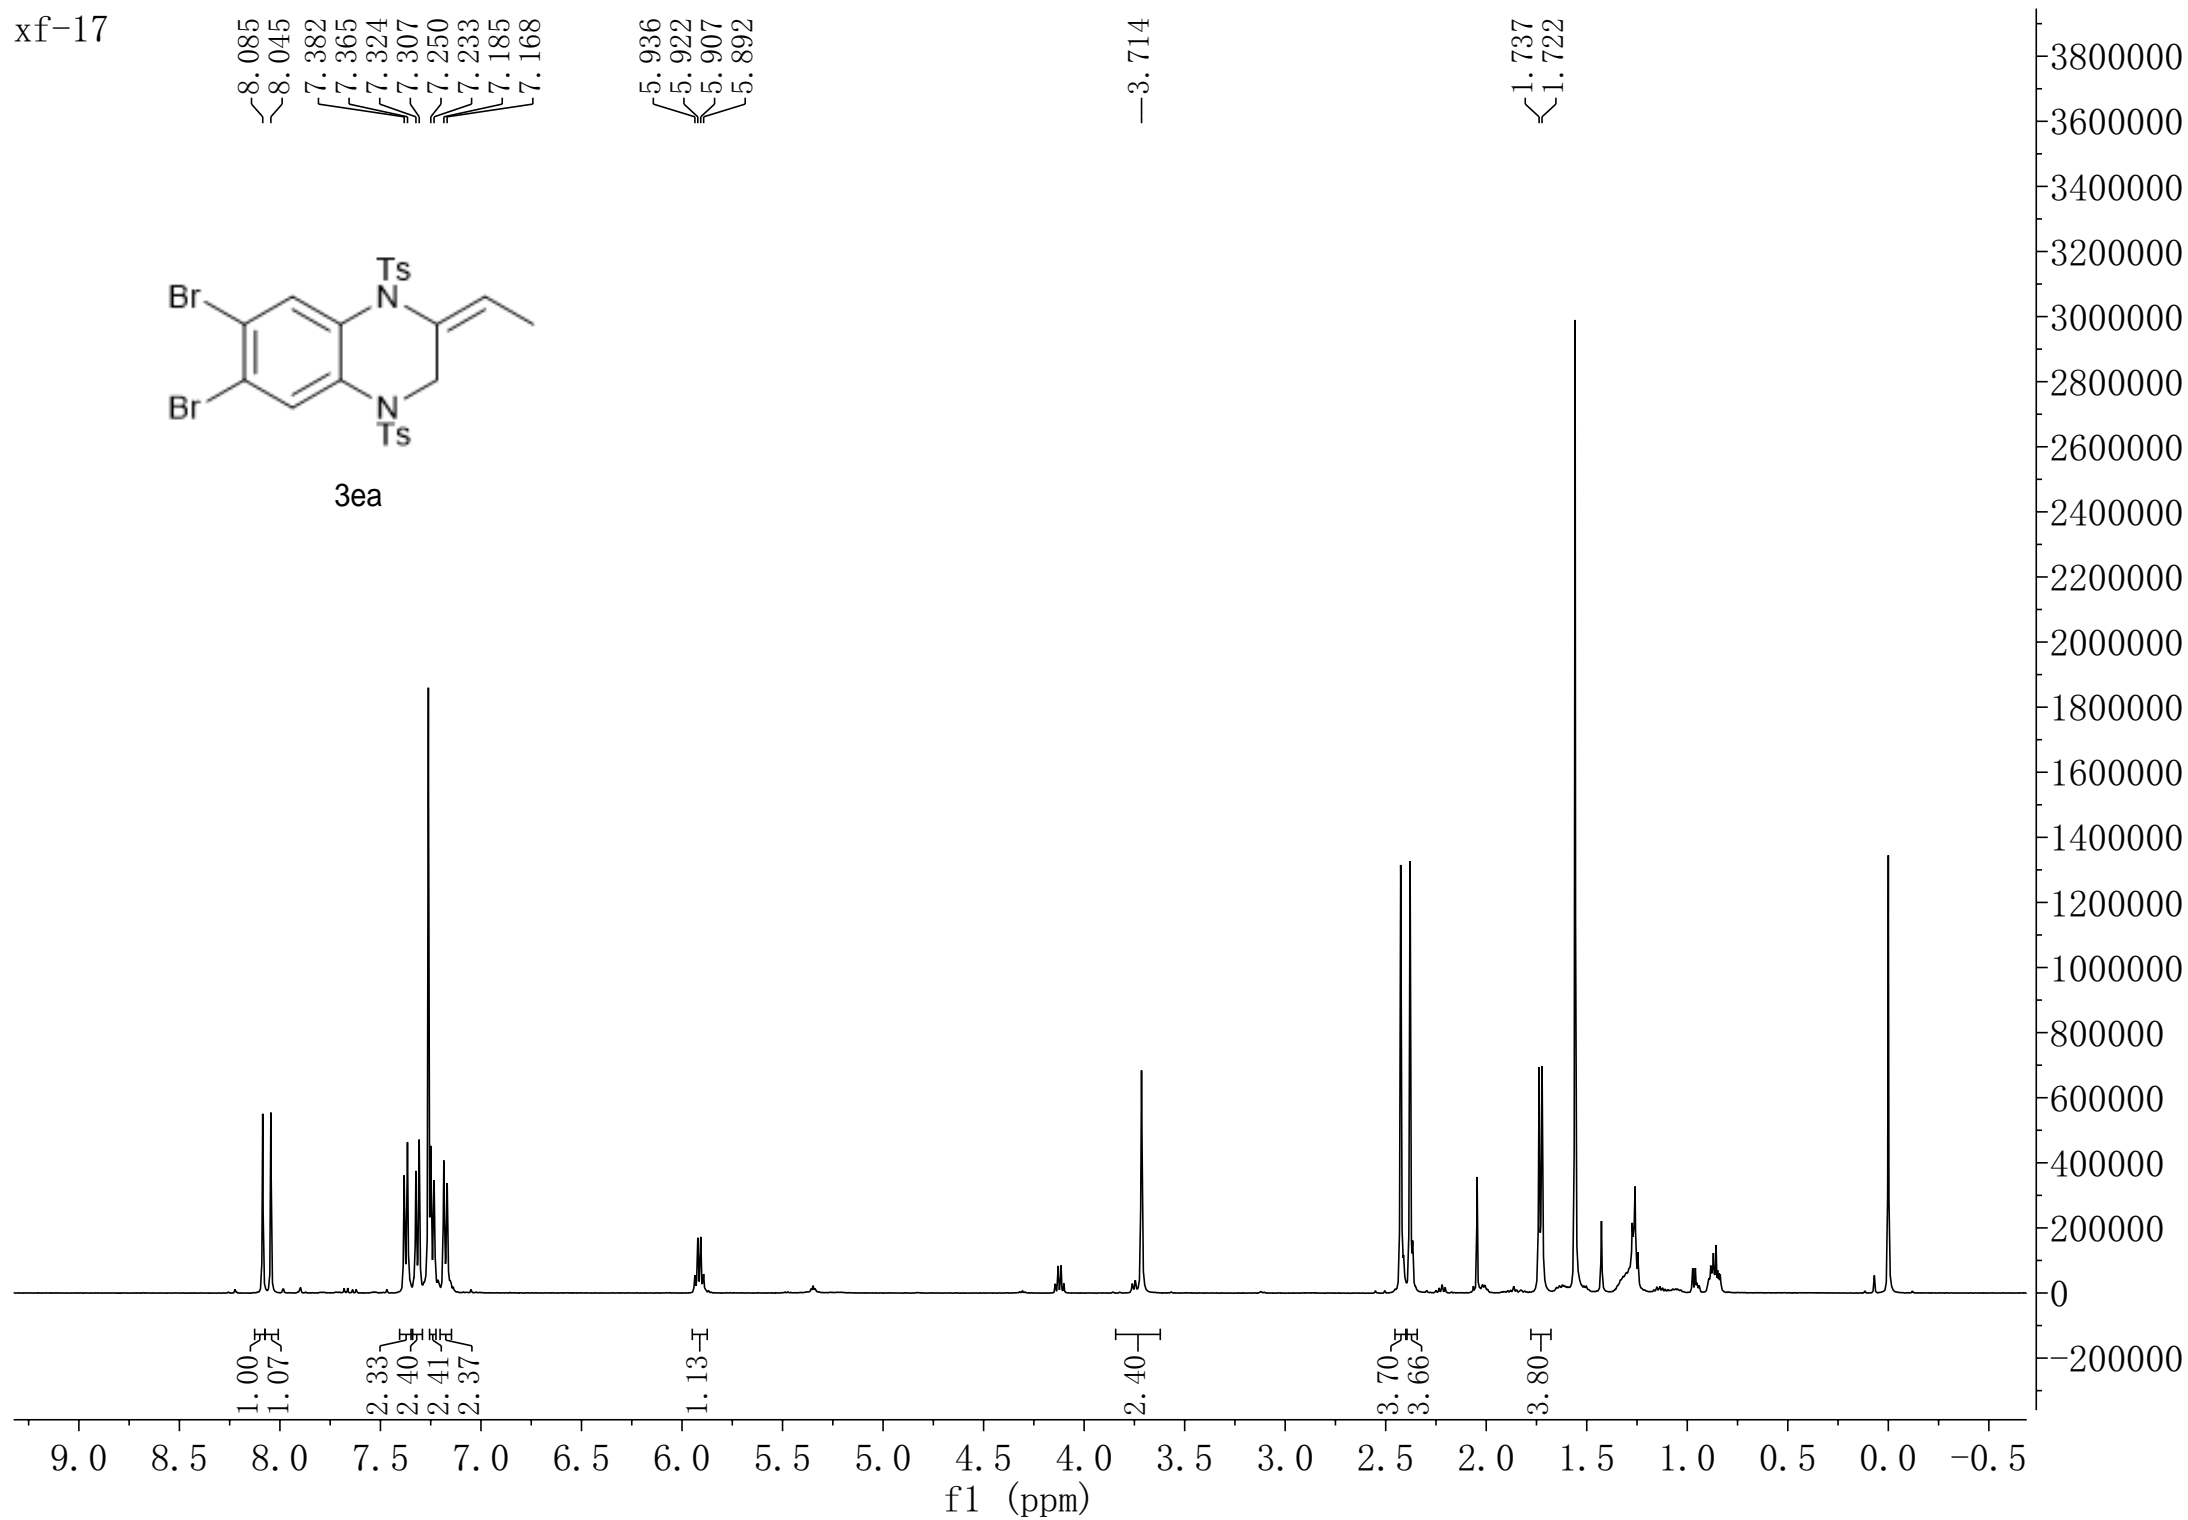

xf-17

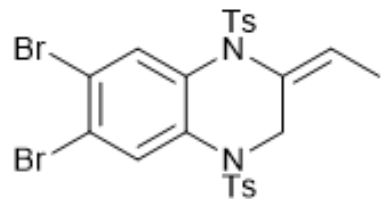

3ea

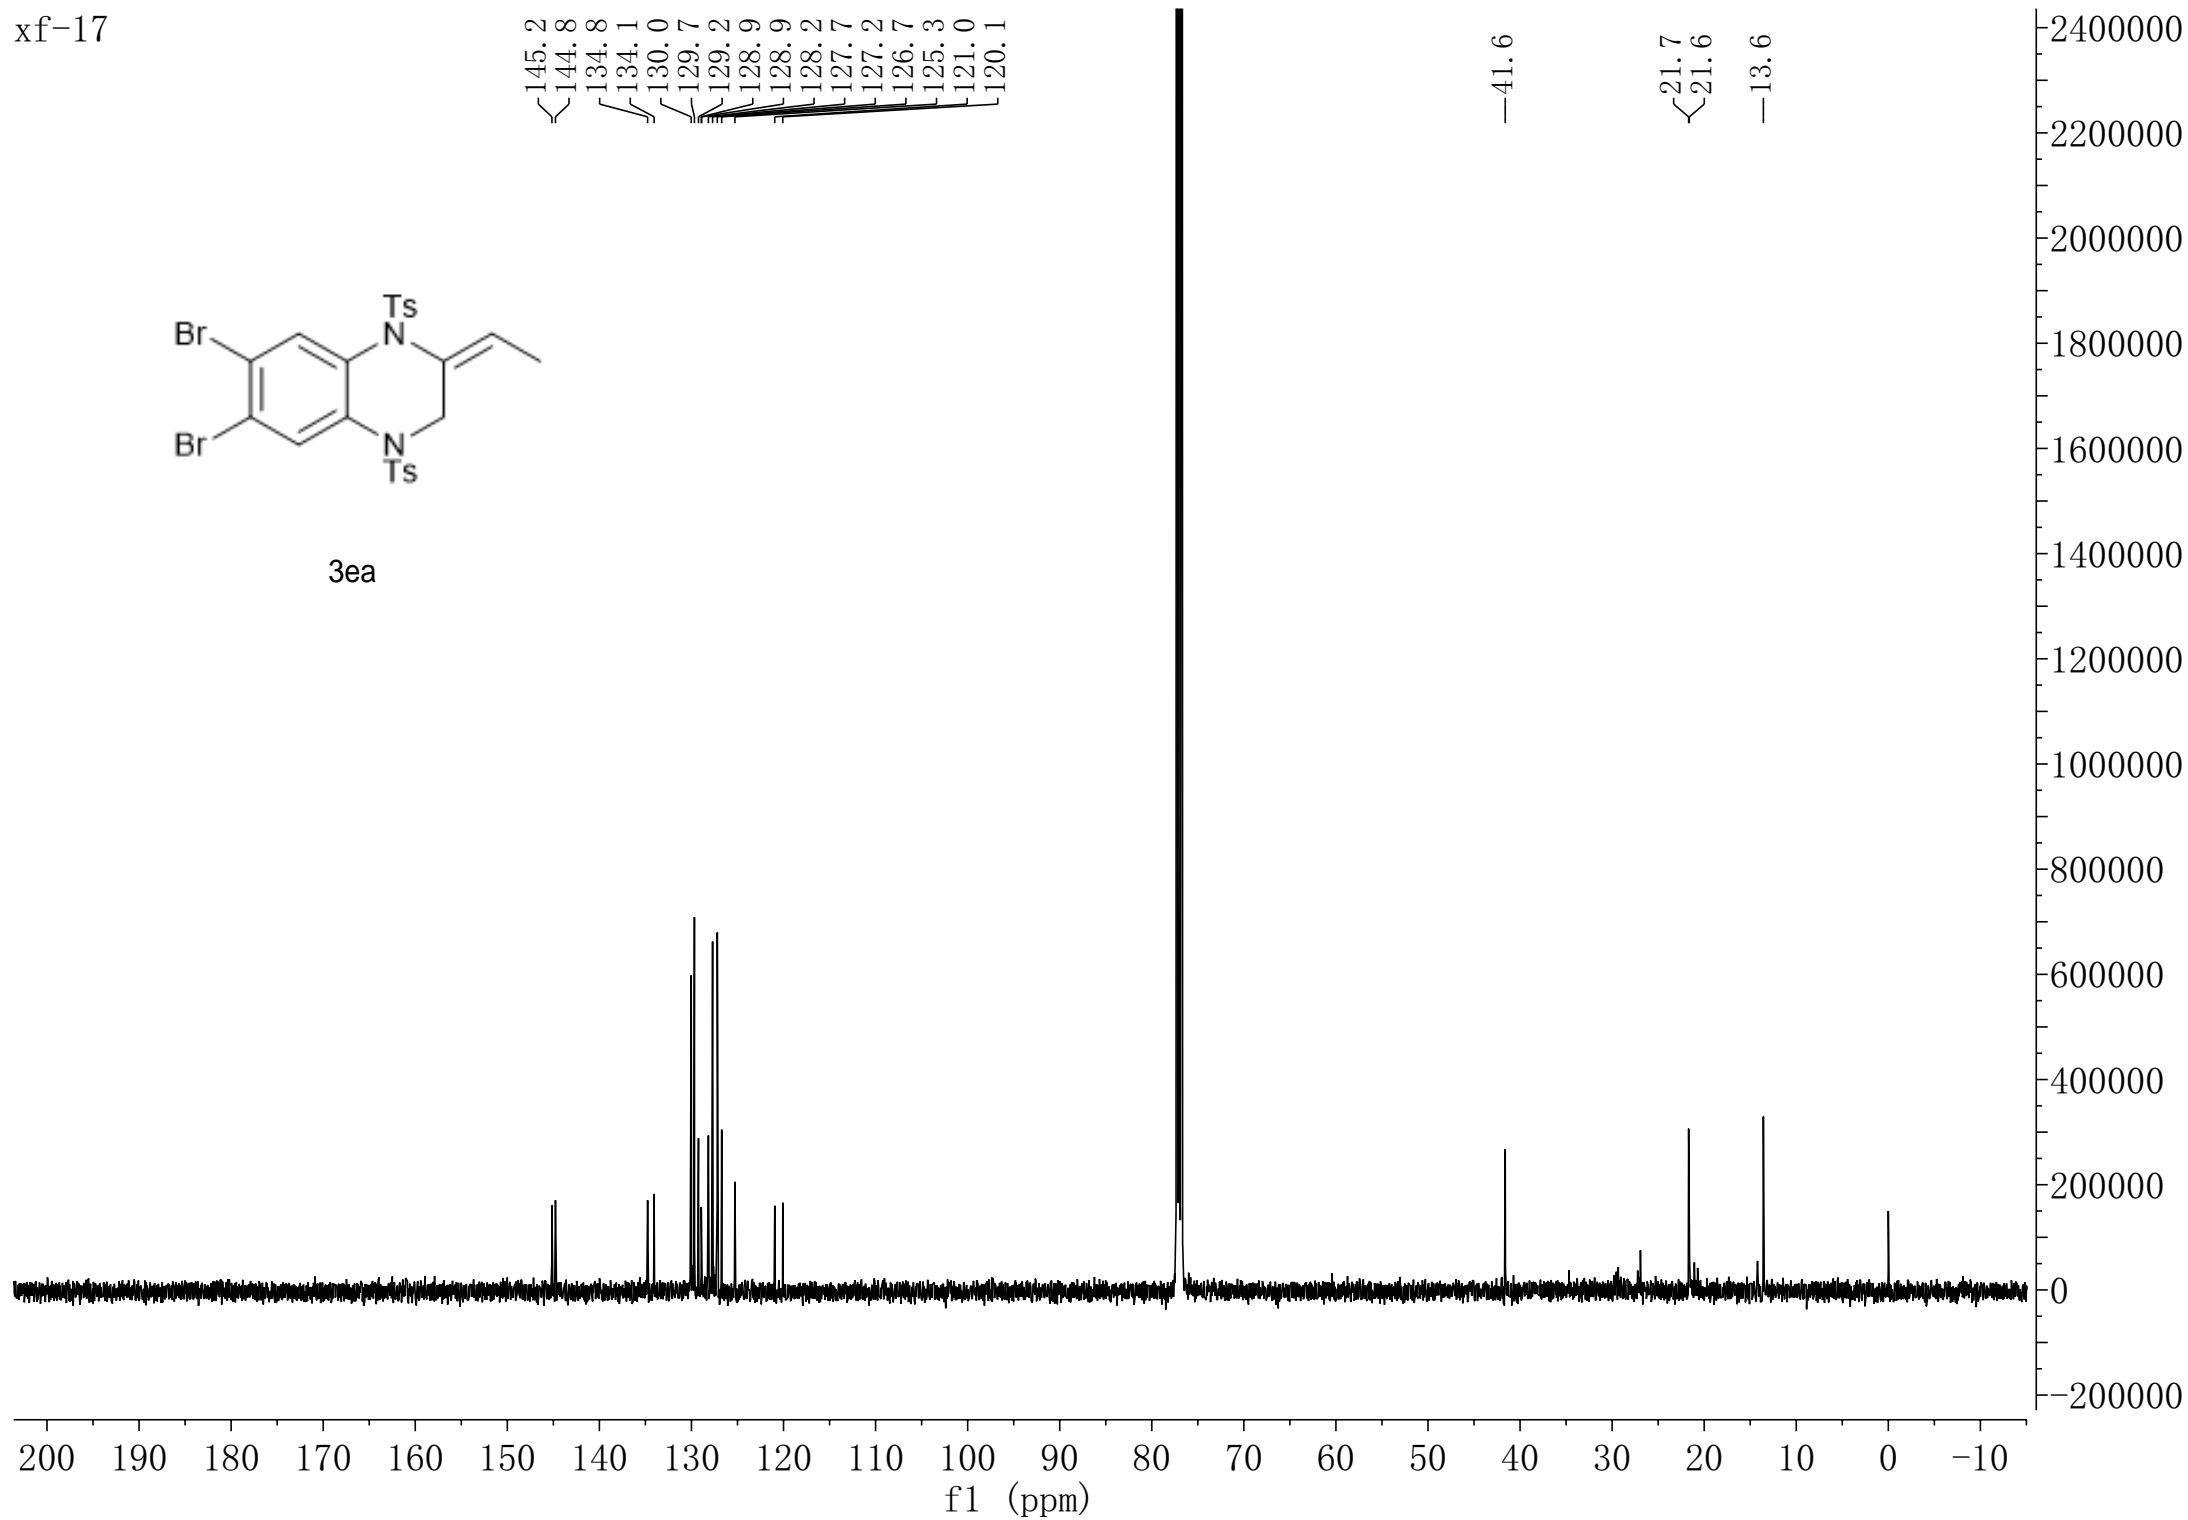

xf-7

7.705  
7.689  
7.647  
7.631  
7.318  
7.302  
7.295  
7.278  
7.259  
7.220  
7.205  
7.072  
7.056  
7.040  
7.022  
7.007  
5.941  
5.936  
5.932  
5.927  
5.922  
5.917

4.672  
4.643

3.945  
3.915

2.467  
2.445  
2.388

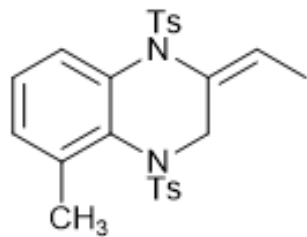

3fa r.r >20:1 on the crude reaction mixture

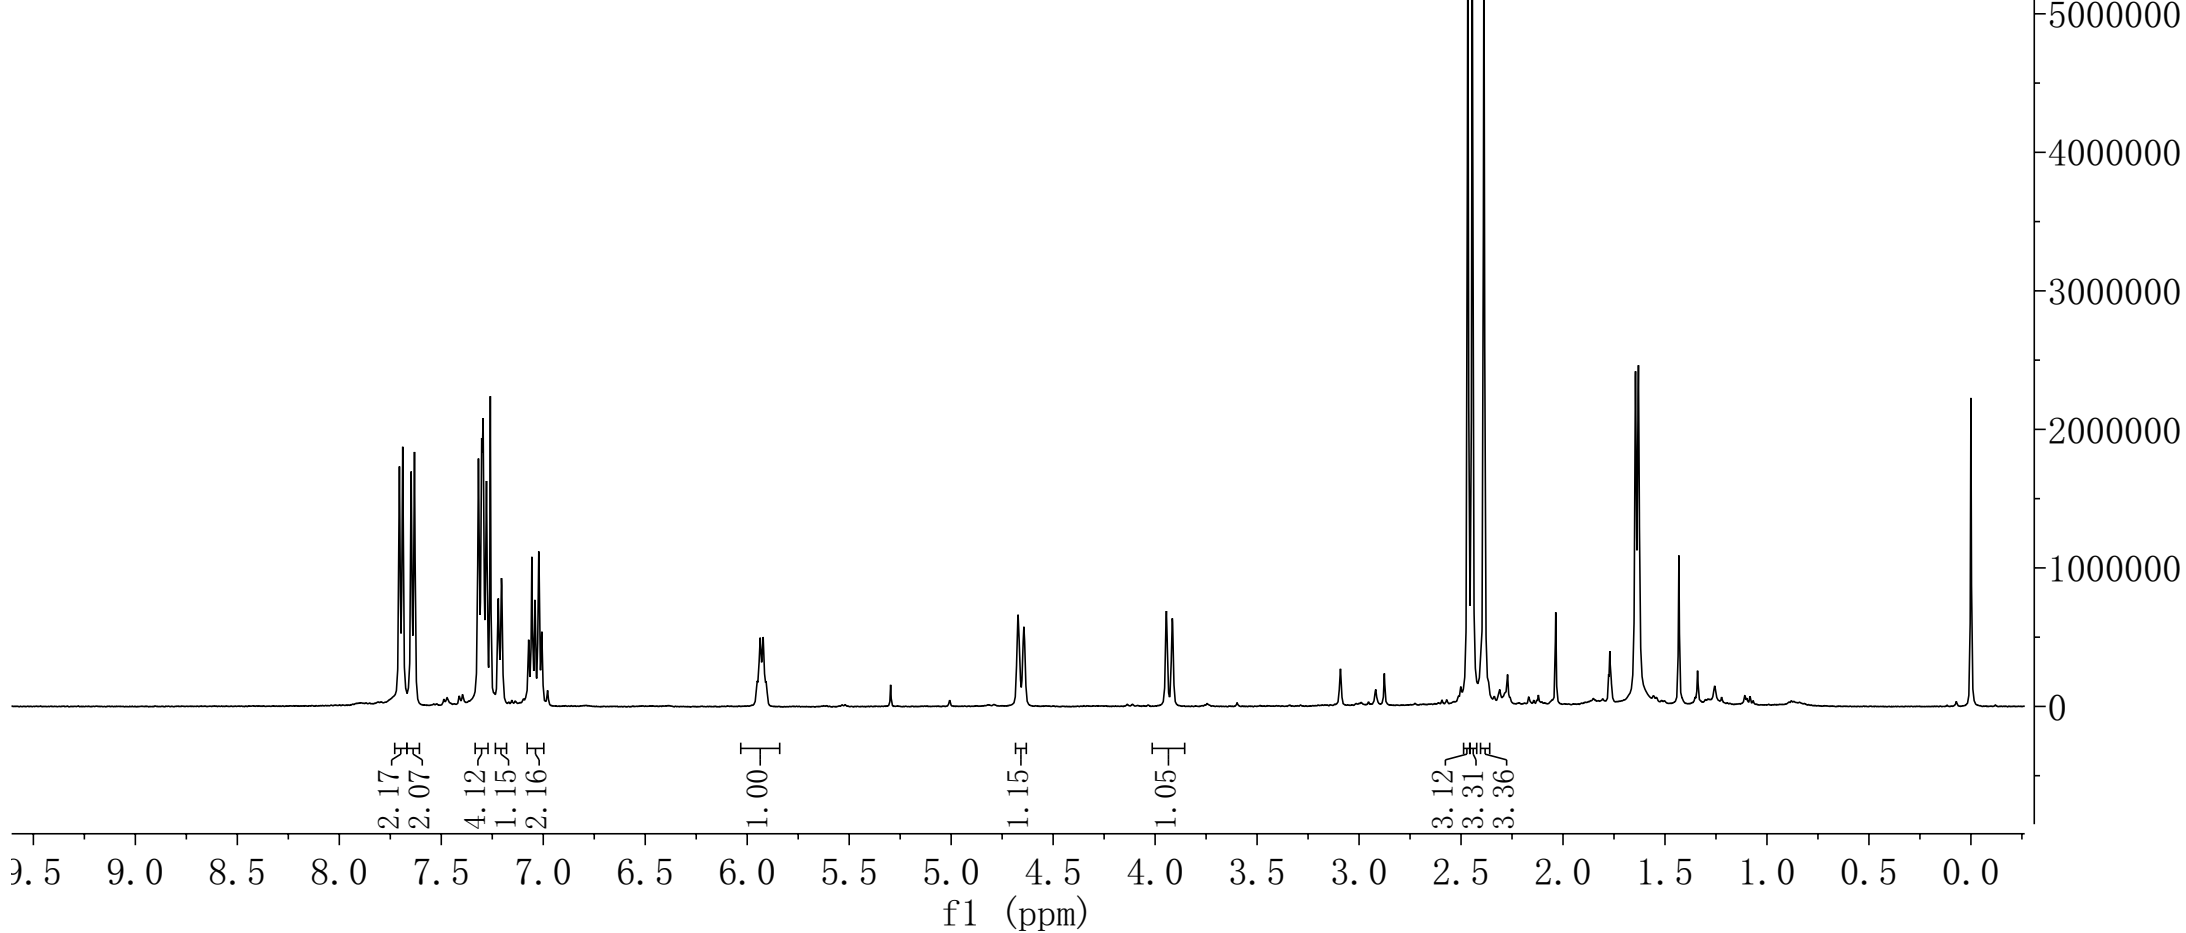

xf-7

7.706  
7.689  
7.648  
7.631  
7.318  
7.302  
7.295  
7.279  
7.219  
7.205  
7.072  
7.056  
7.041  
7.022  
7.008  
5.957  
5.938  
5.923  
5.904

4.672  
4.643

3.944  
3.915

2.467  
2.445  
2.388

1.645  
1.630

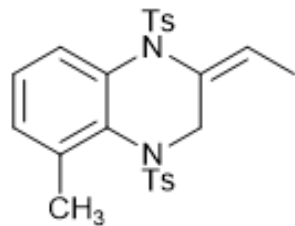

3fa

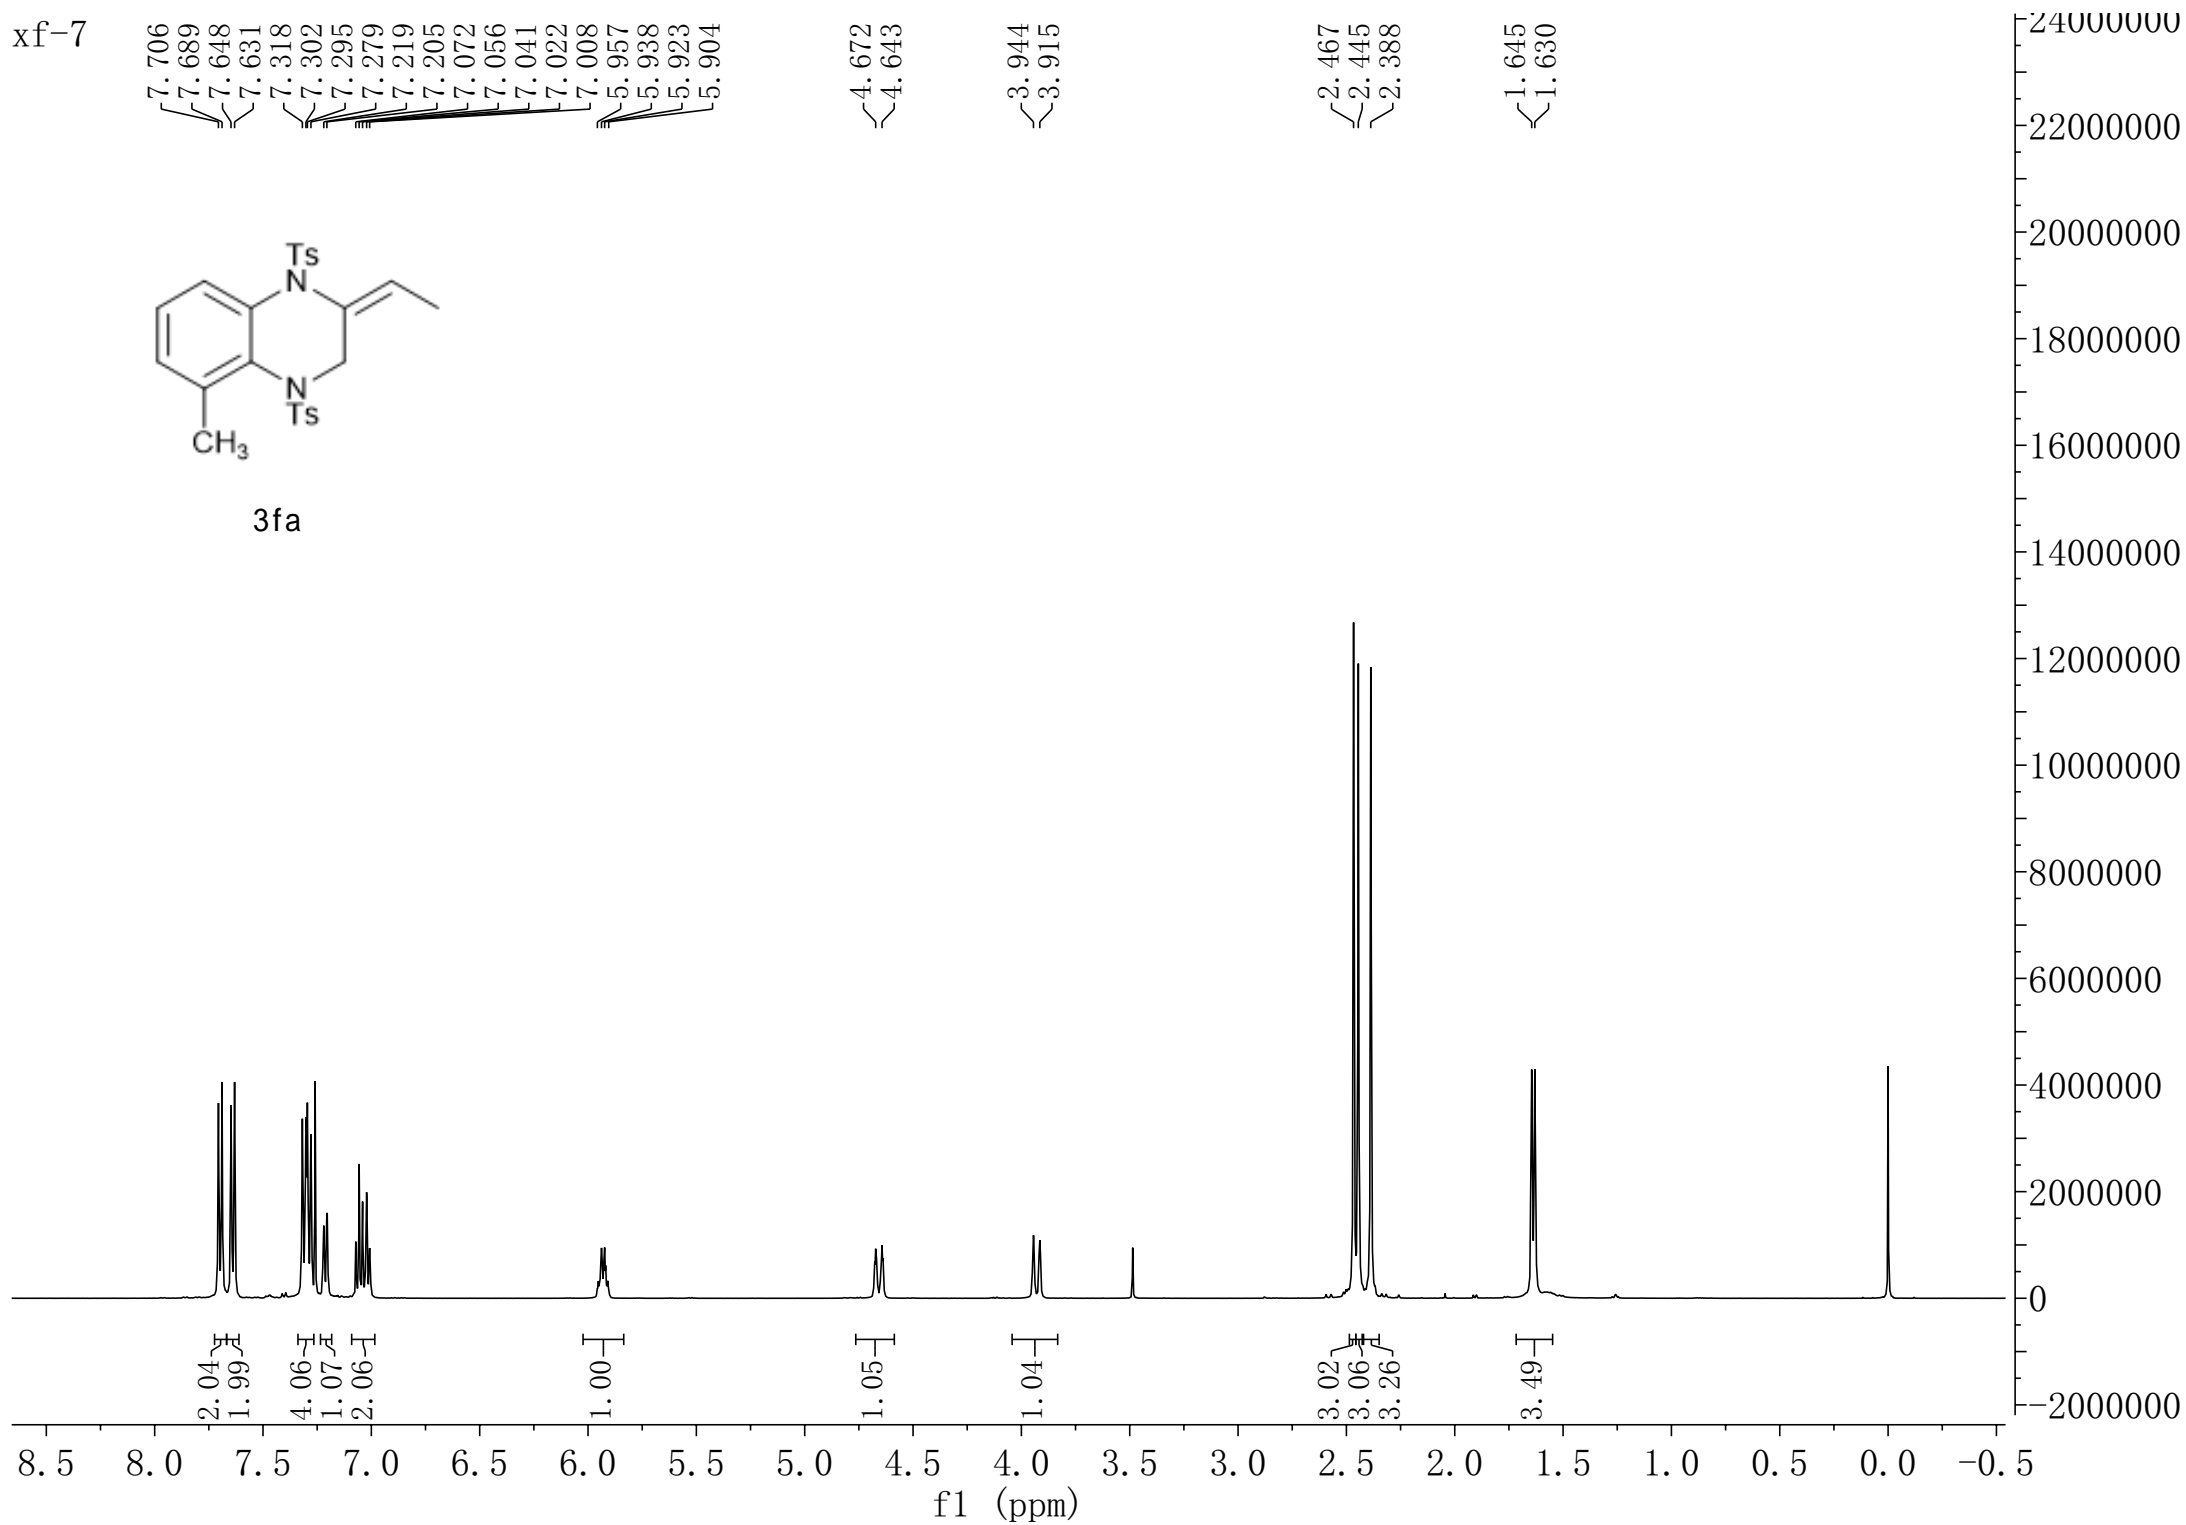

xf-7

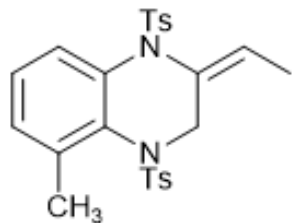

3fa

148.2  
145.1  
144.1  
143.8  
142.4  
141.4  
138.2  
133.2  
131.3  
130.9  
129.7  
129.5  
129.4  
129.0  
126.1  
125.4  
124.9

66.1

21.6  
21.5  
16.6  
13.1

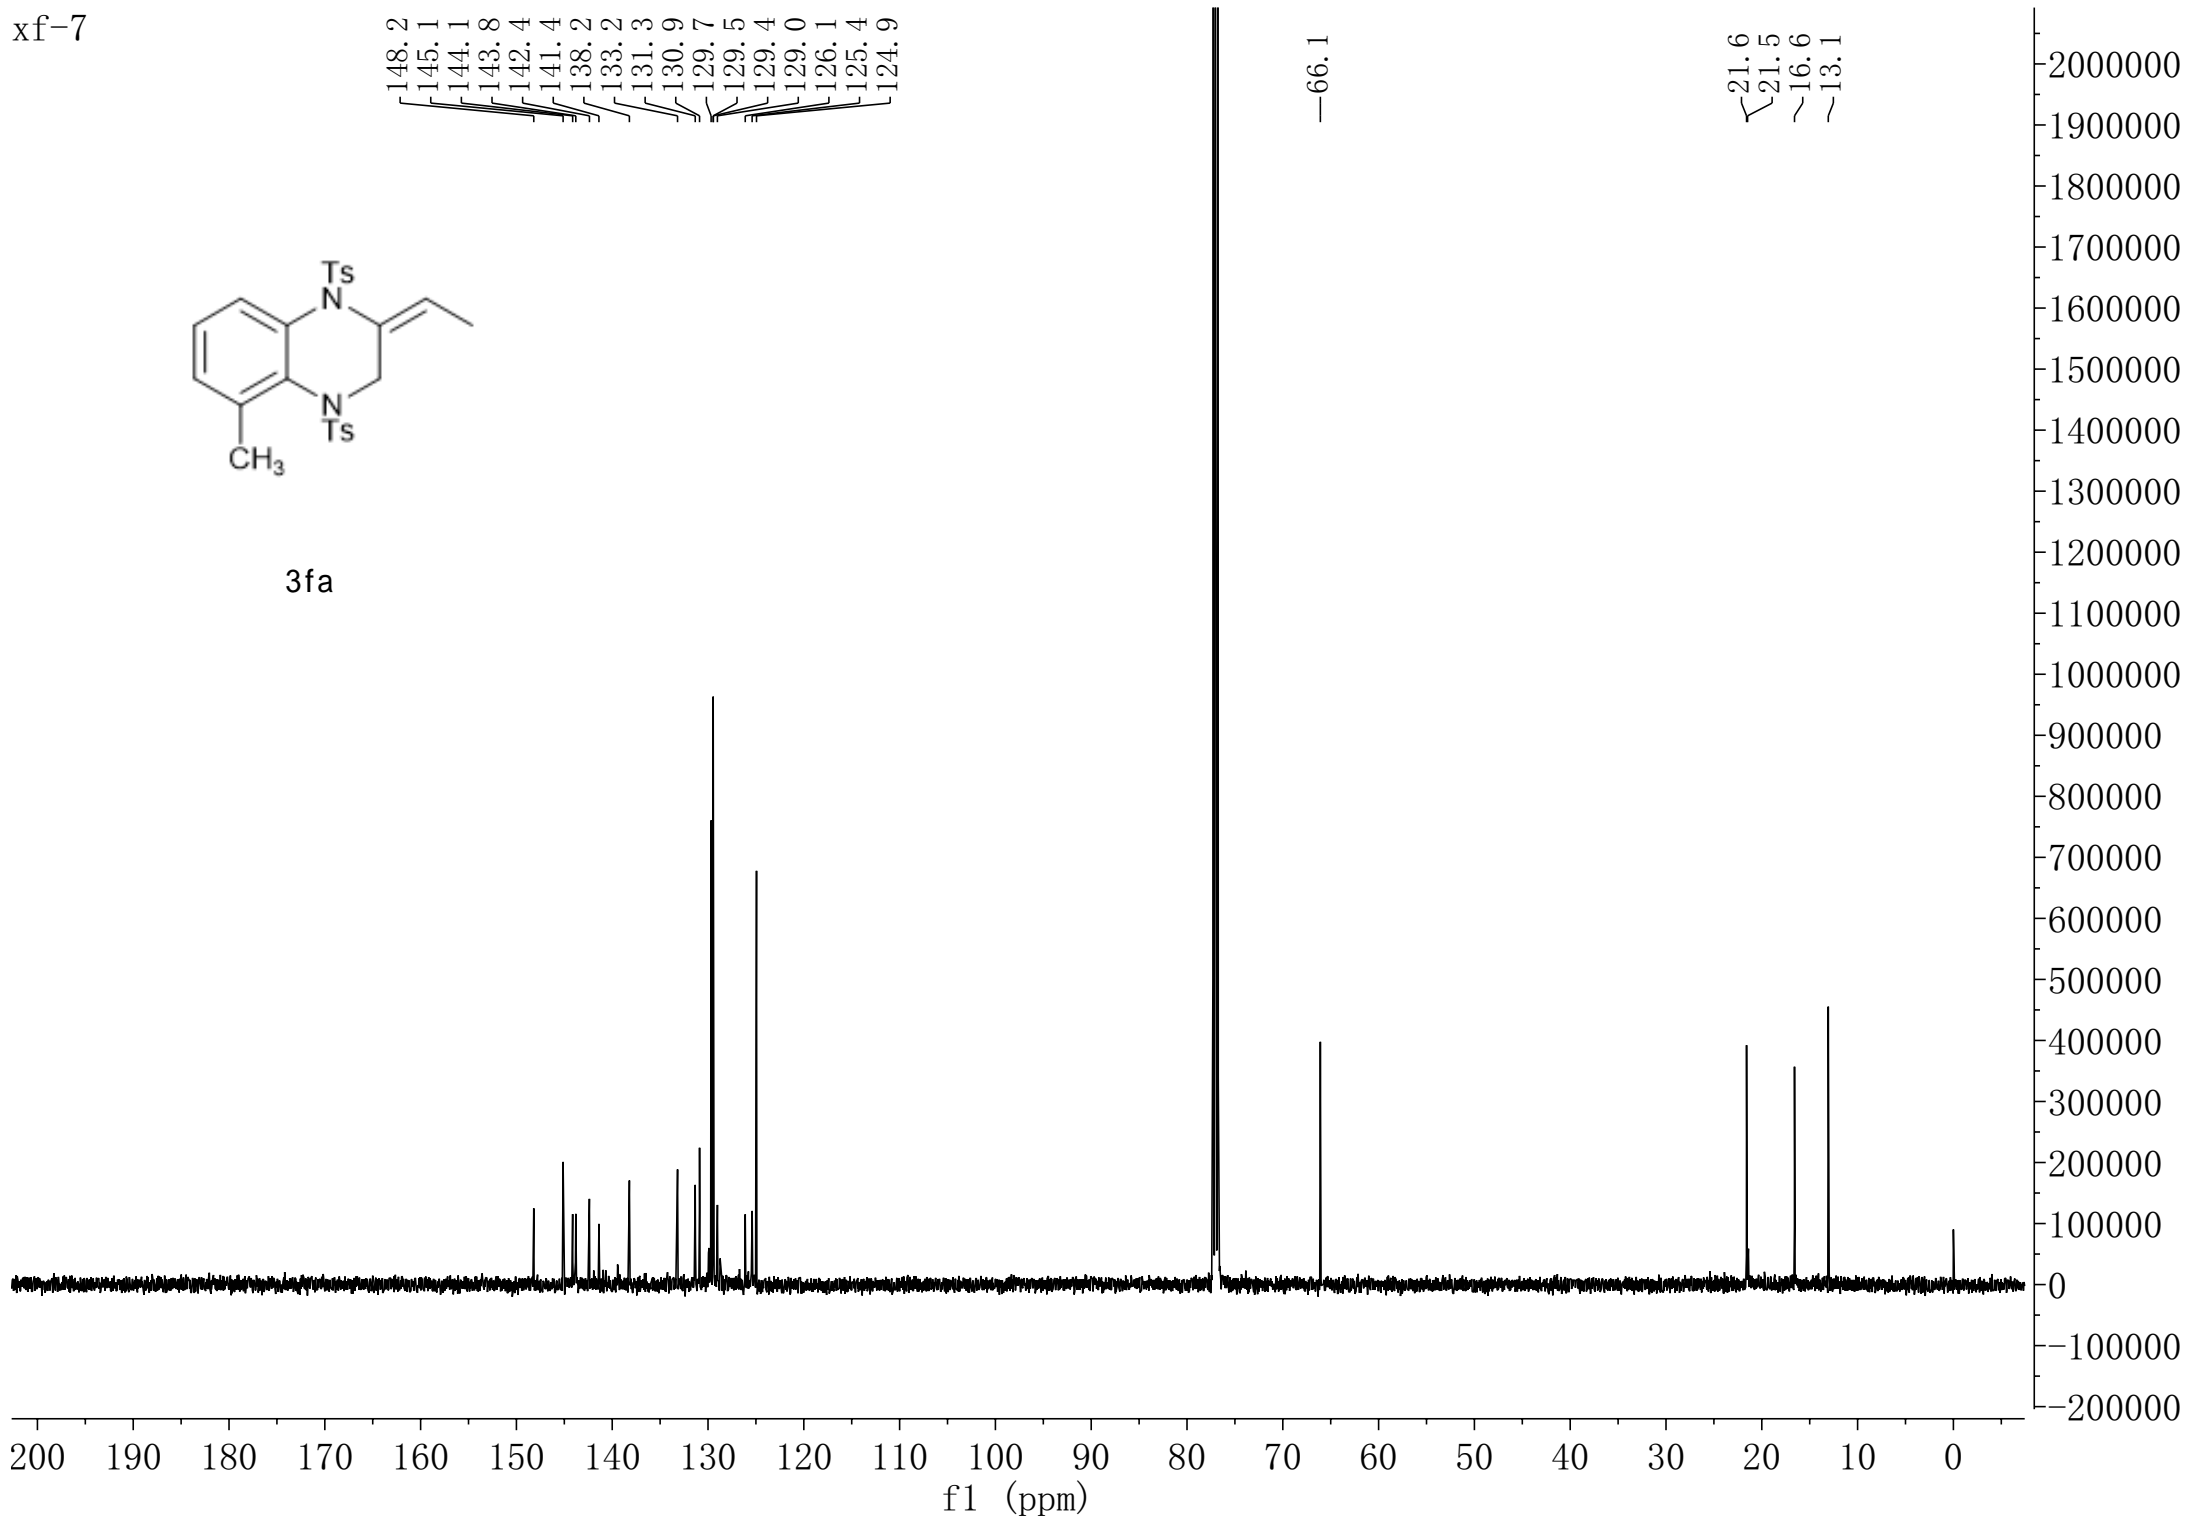

xf-39

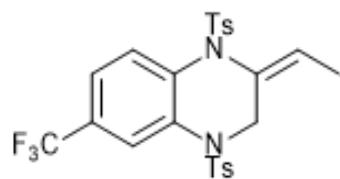

3ga

+

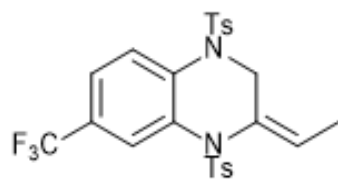

3ga\*

5.972  
5.960  
5.948  
5.936

3.868  
3.777

r.r = 4:1 on the crude reaction mixture

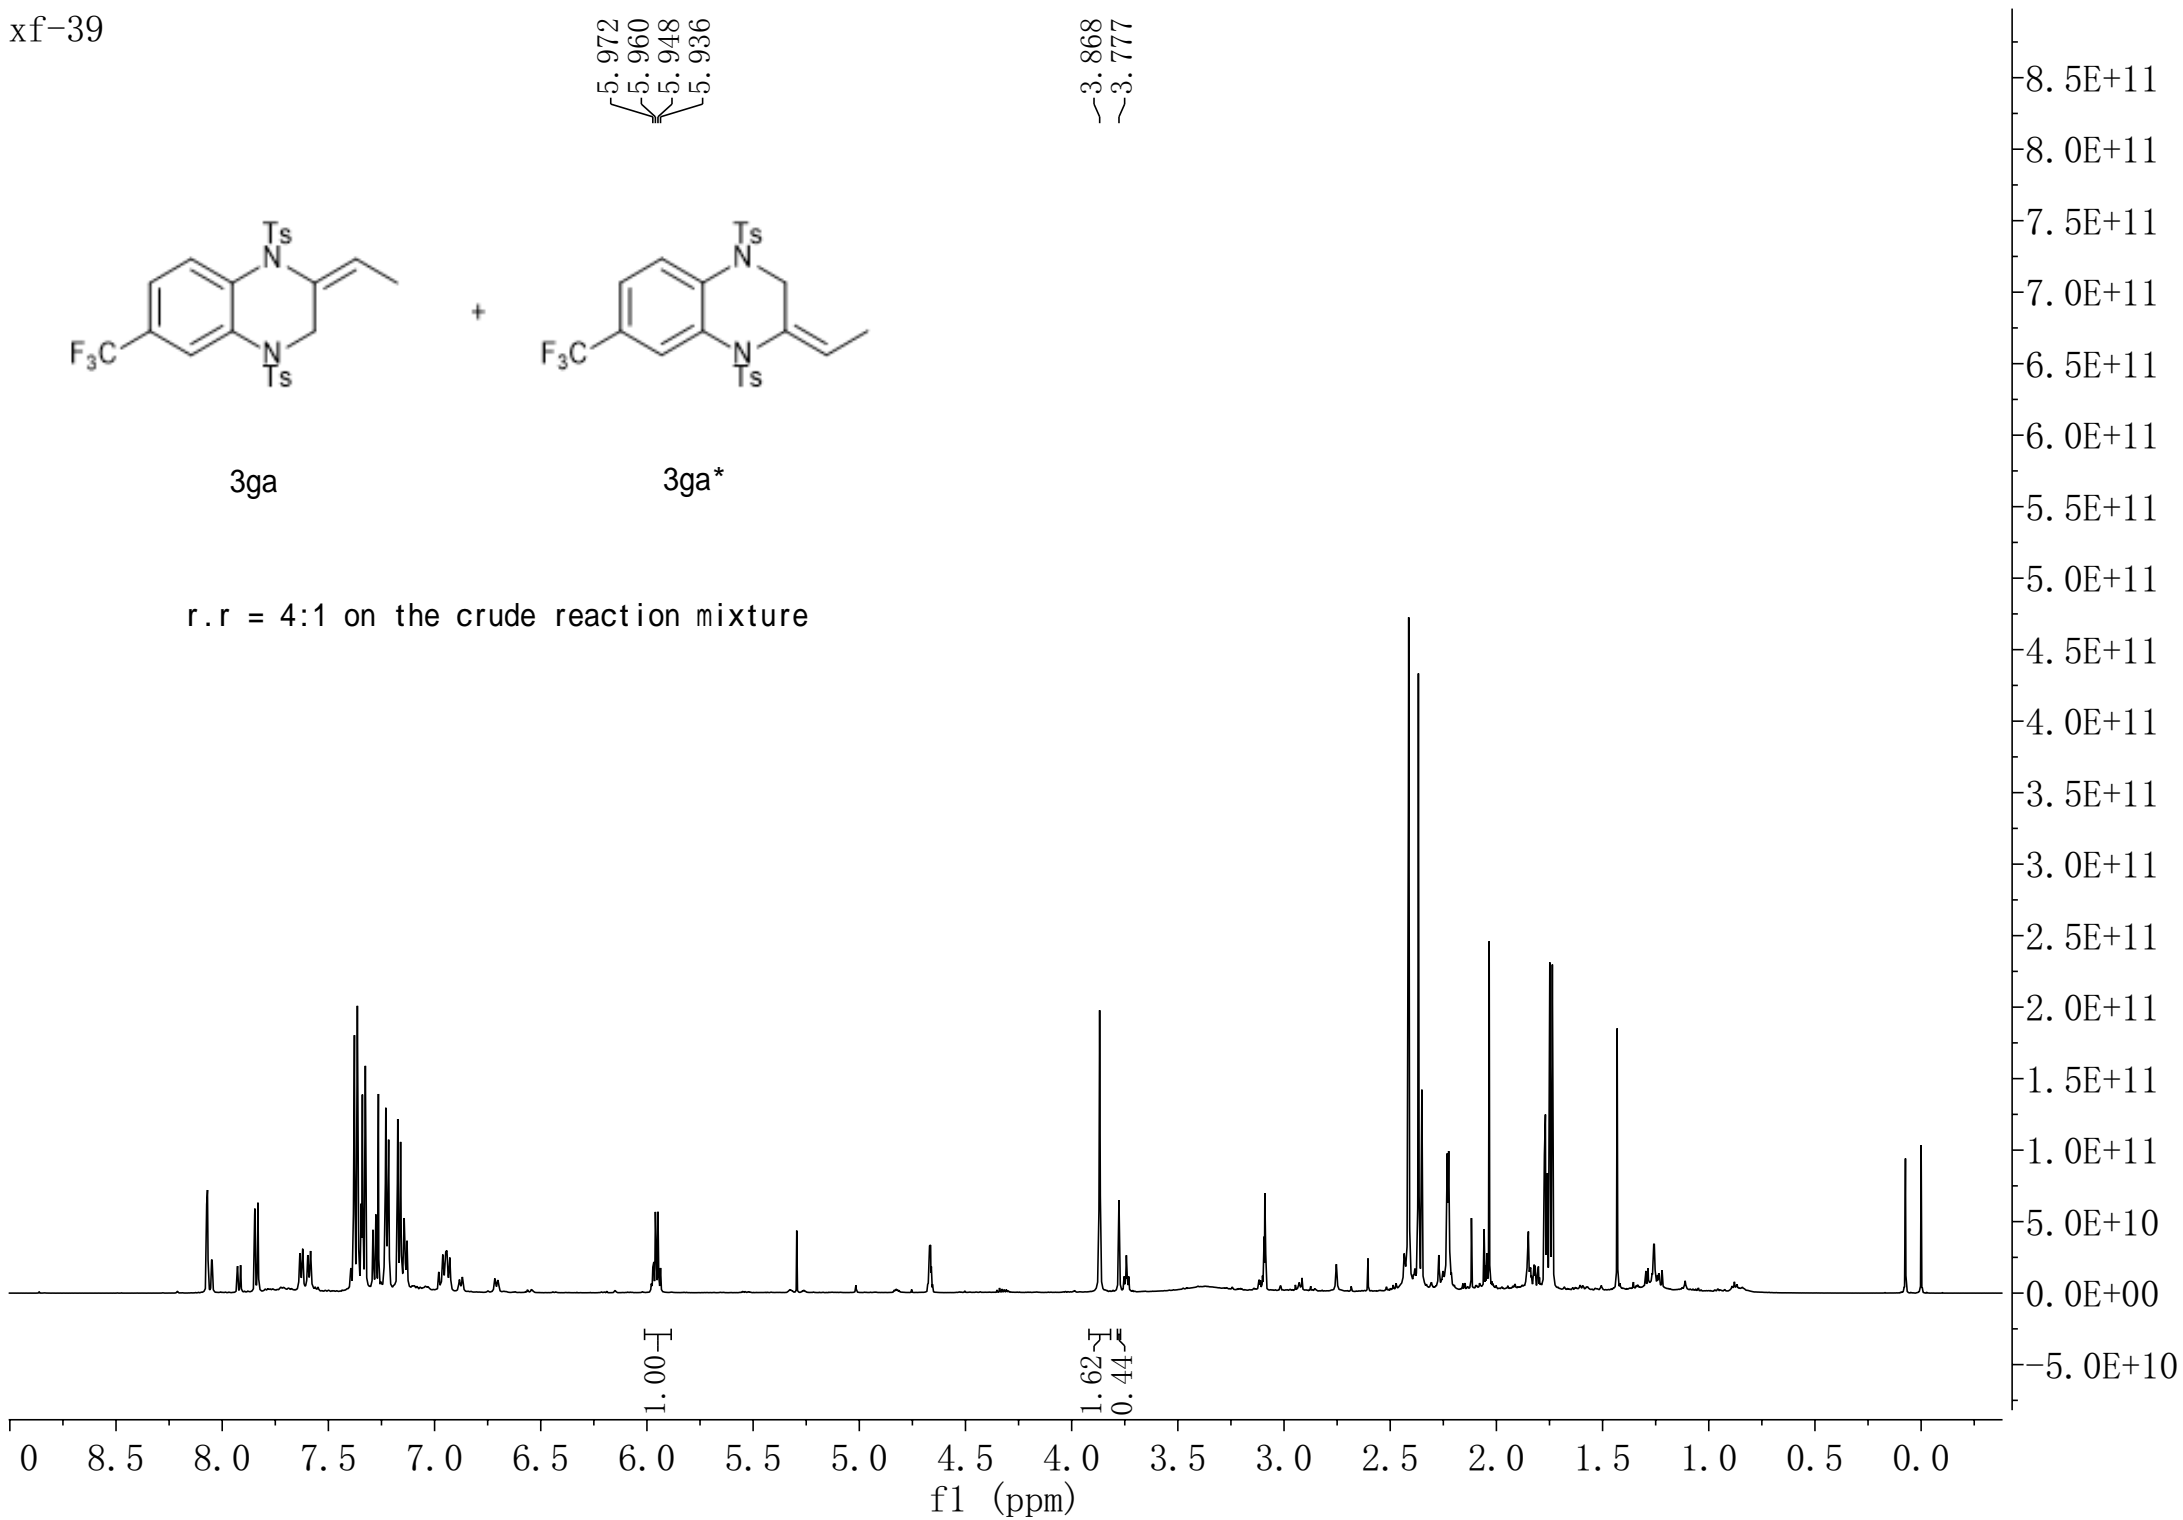



xf-39

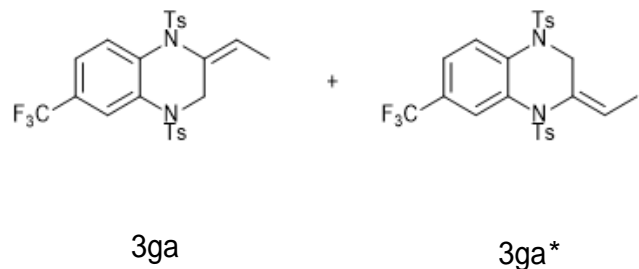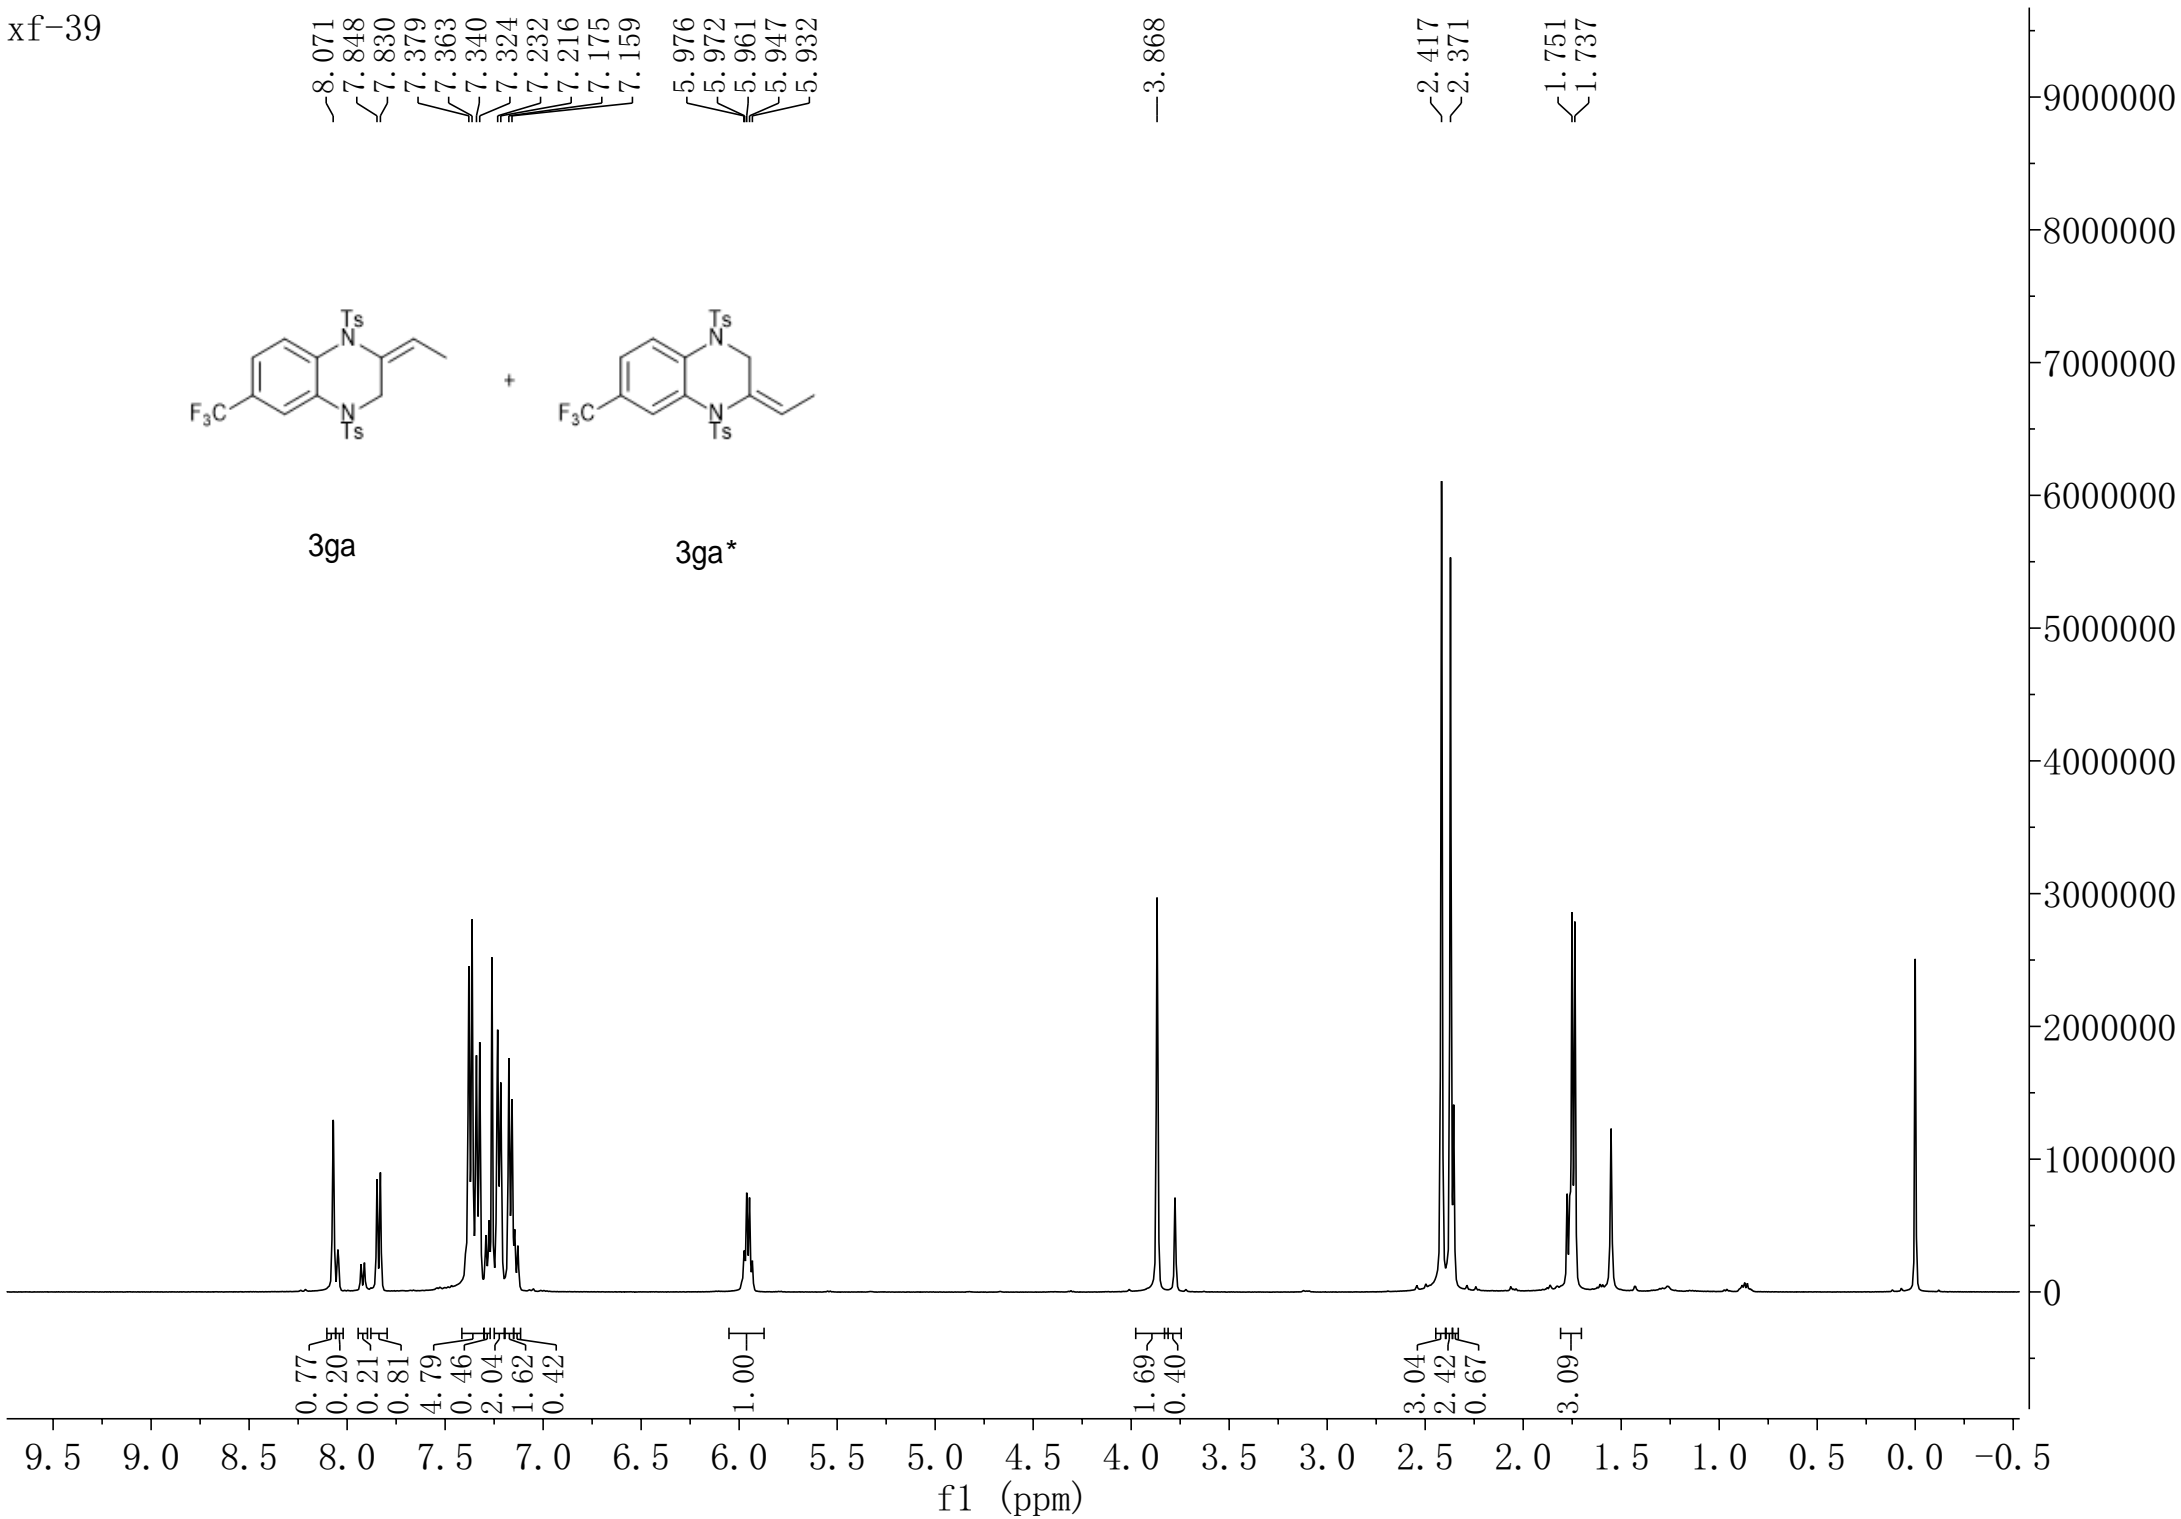

xf-39

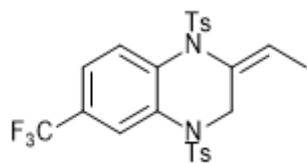

3ga

+

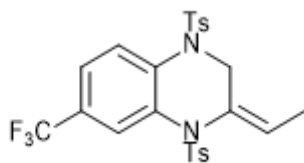

3ga\*

145.0  
144.7  
135.1  
134.3  
132.2  
130.0  
130.0  
129.7  
129.6  
129.0  
127.8  
127.7  
127.6  
127.2  
127.1  
125.8  
122.8  
122.8  
122.4  
122.3  
122.3

42.4  
41.7

21.7  
21.6

13.5

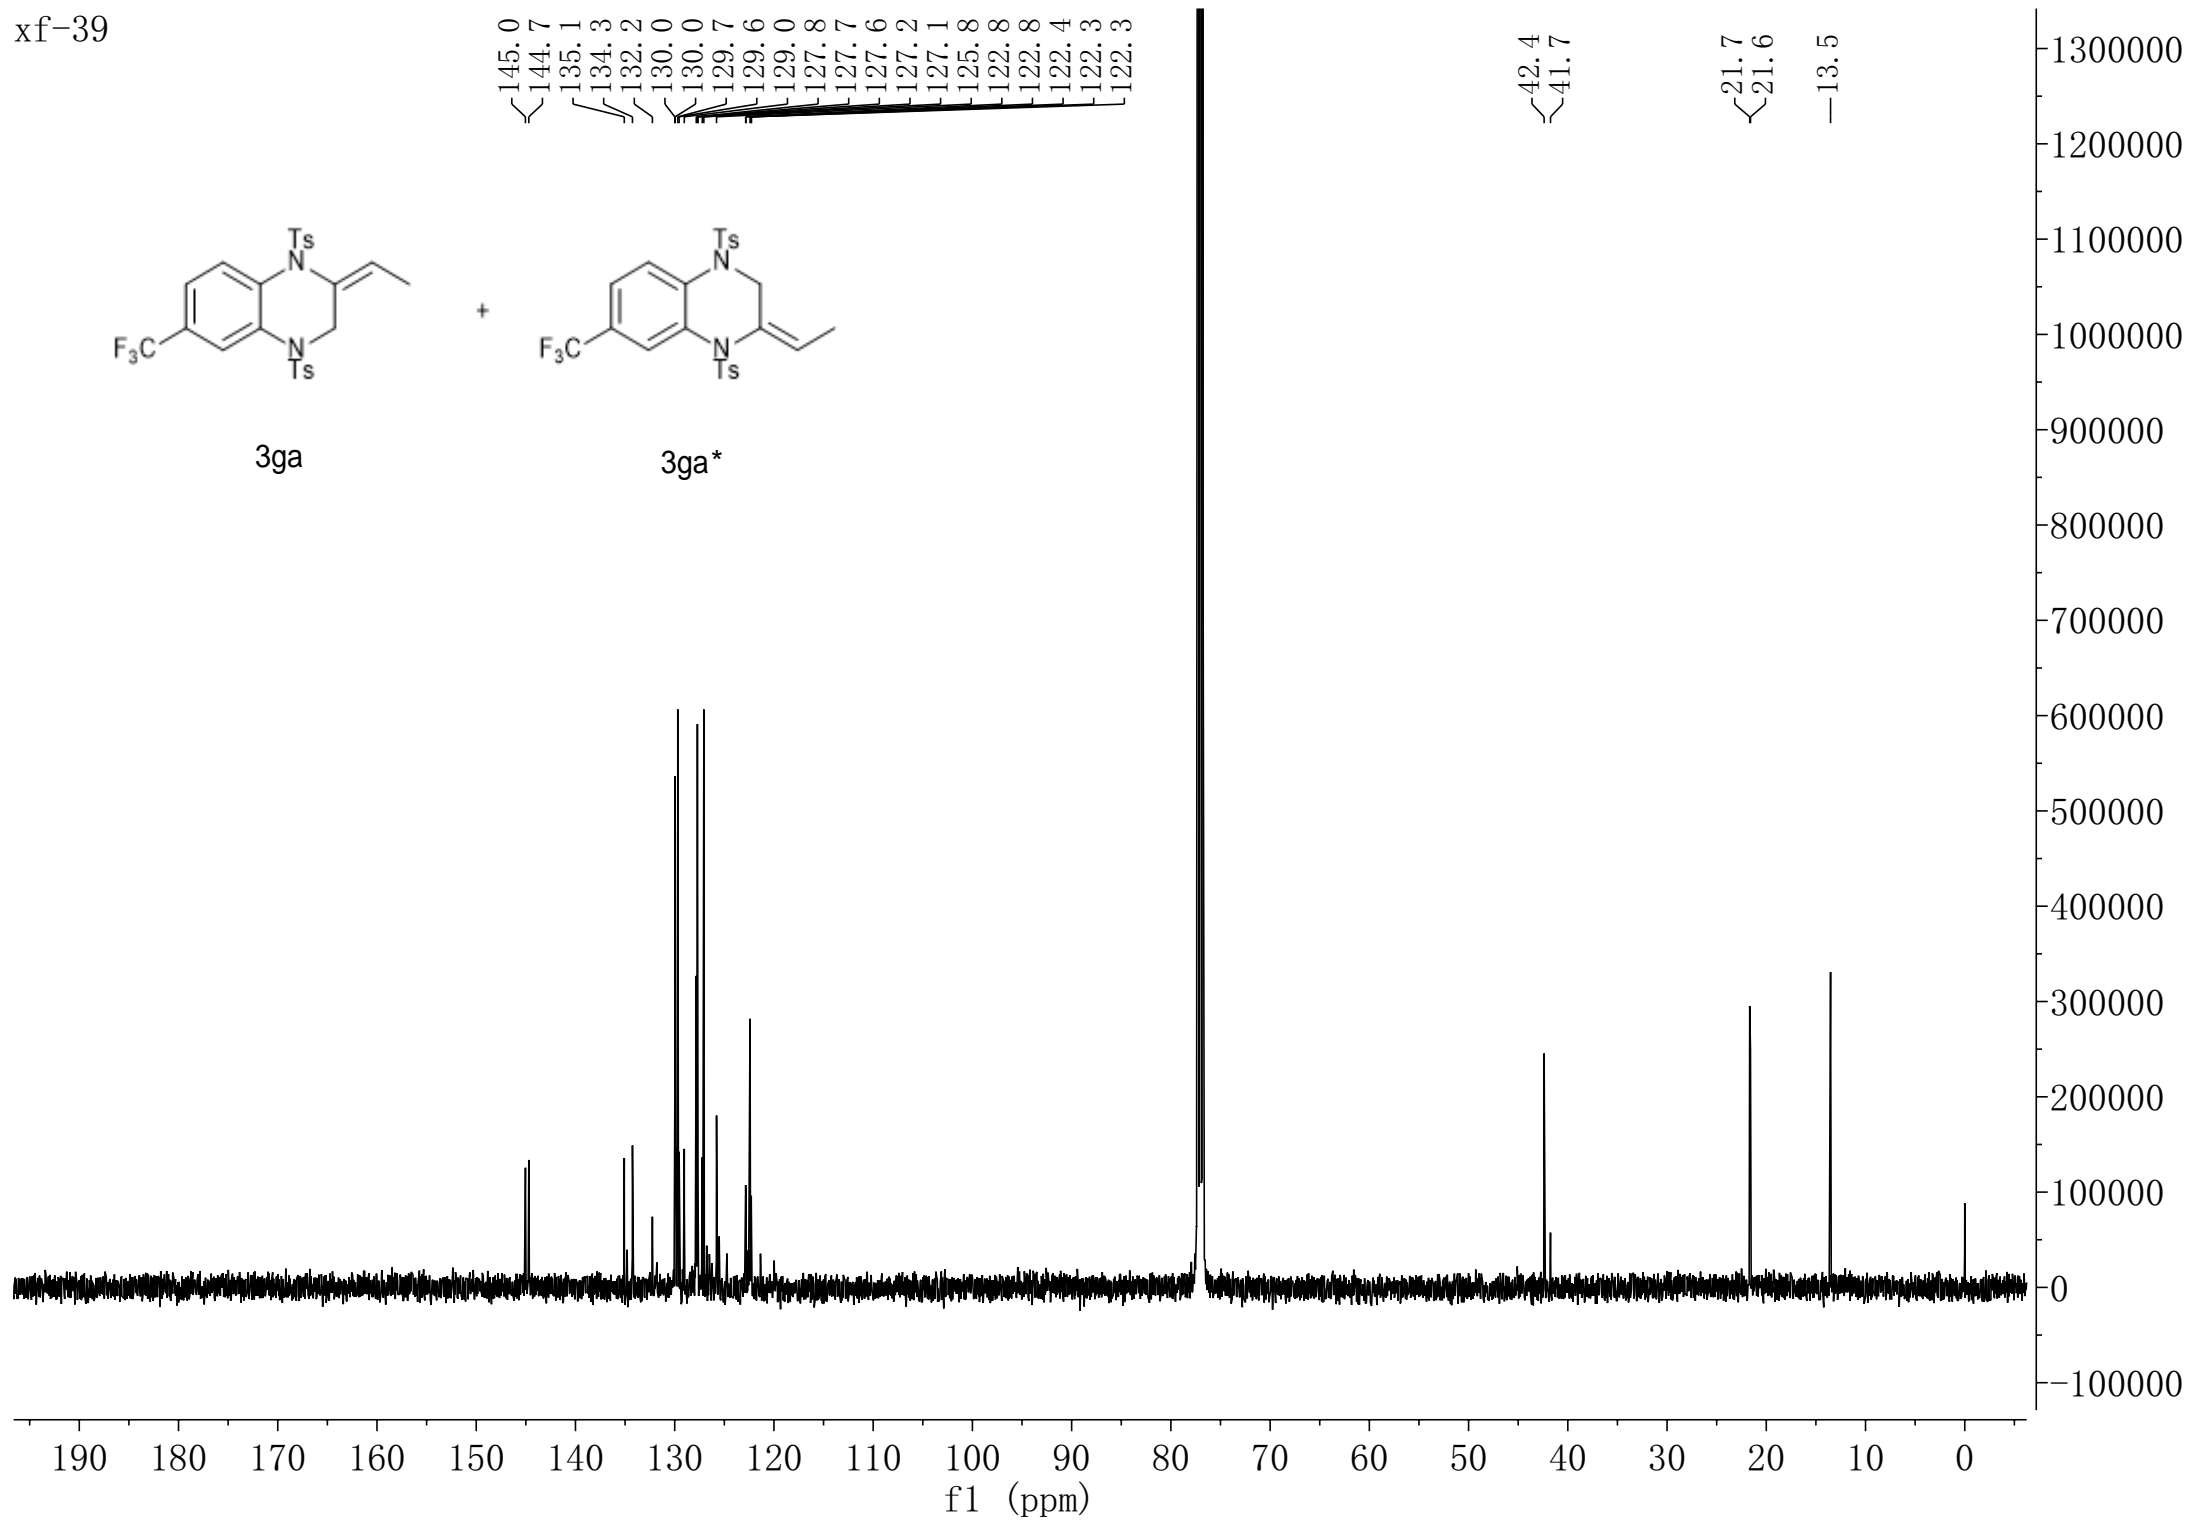

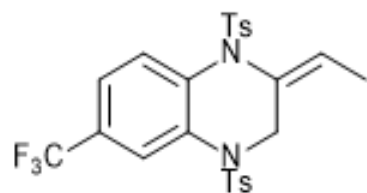

3ga

+

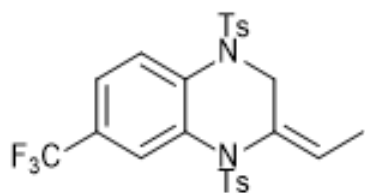

3ga\*

-62.29  
-62.44

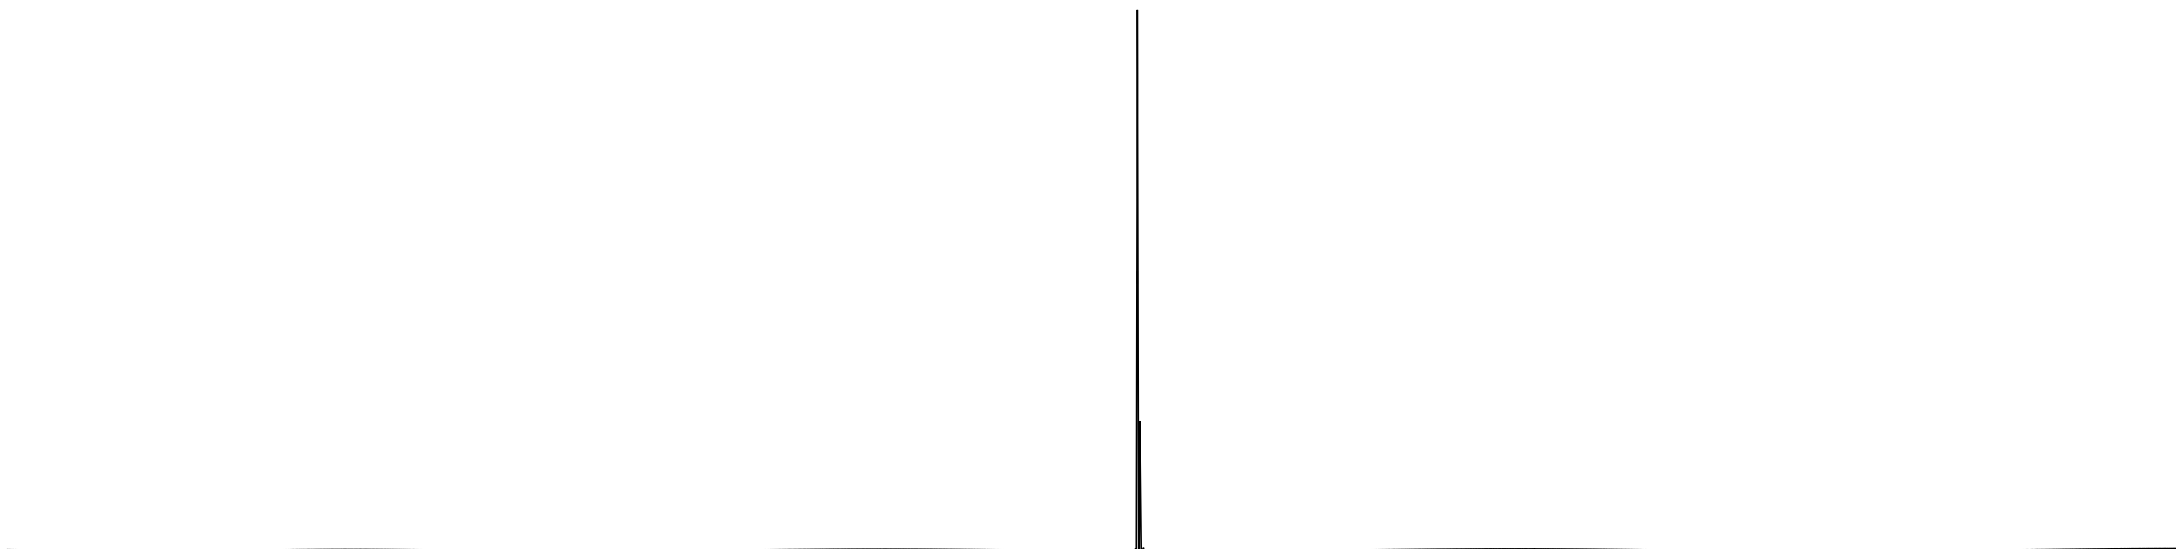

5

-5

-15

-25

-35

-45

-55

-65

-75

-85

-95

-105

-115

-120

f1 (ppm)

xf-40

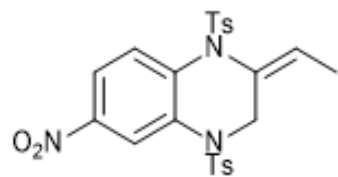

3ha

+

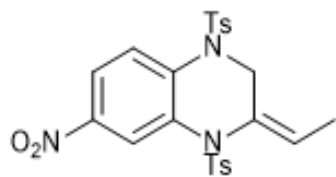

3ha\*

6.008  
5.996  
5.984  
5.971

3.920  
3.798

3ha:3ha\*(r.r)= 10:1 on the crude reaction mixture

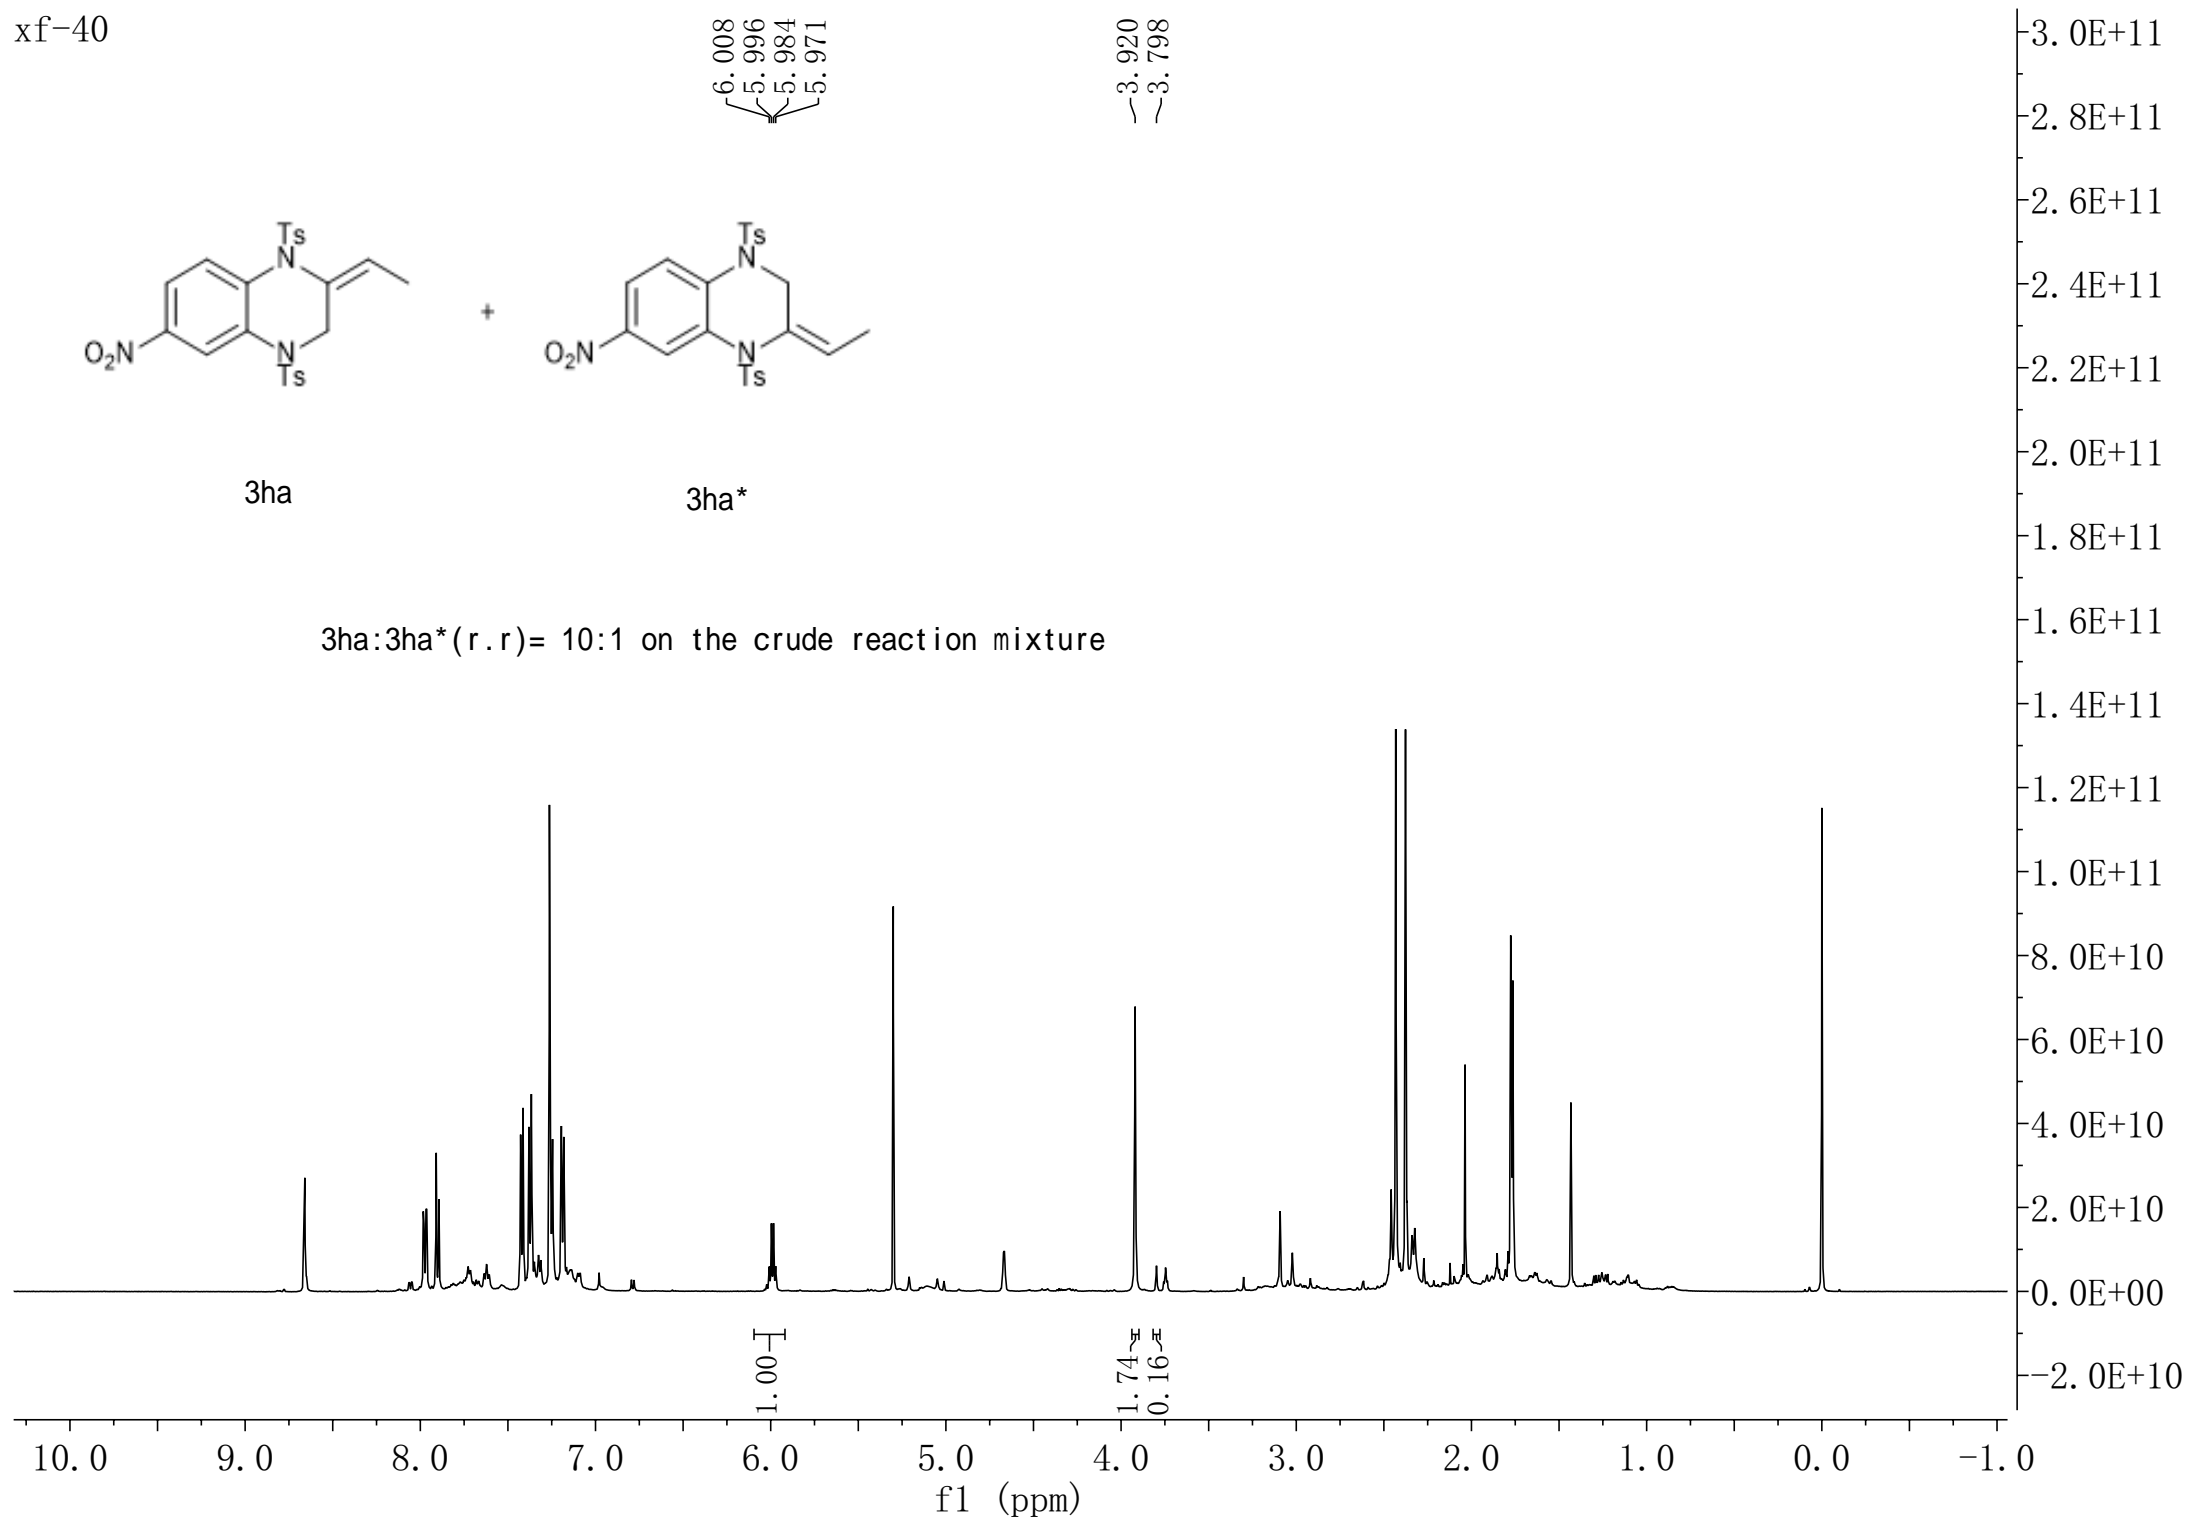

XF-40

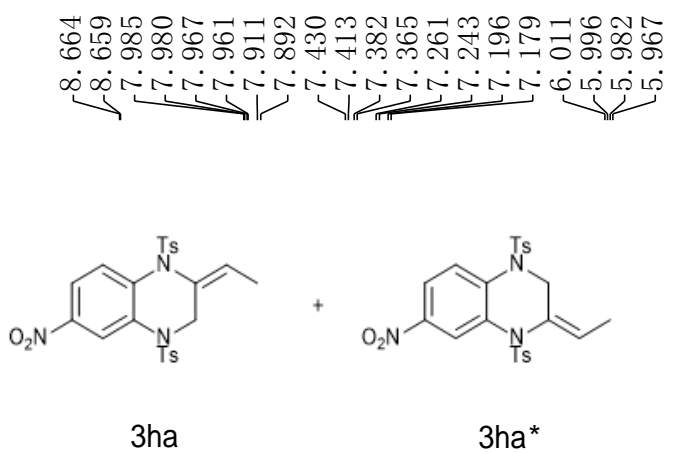

3.922  
3.799  
2.433  
2.377  
1.777  
1.762

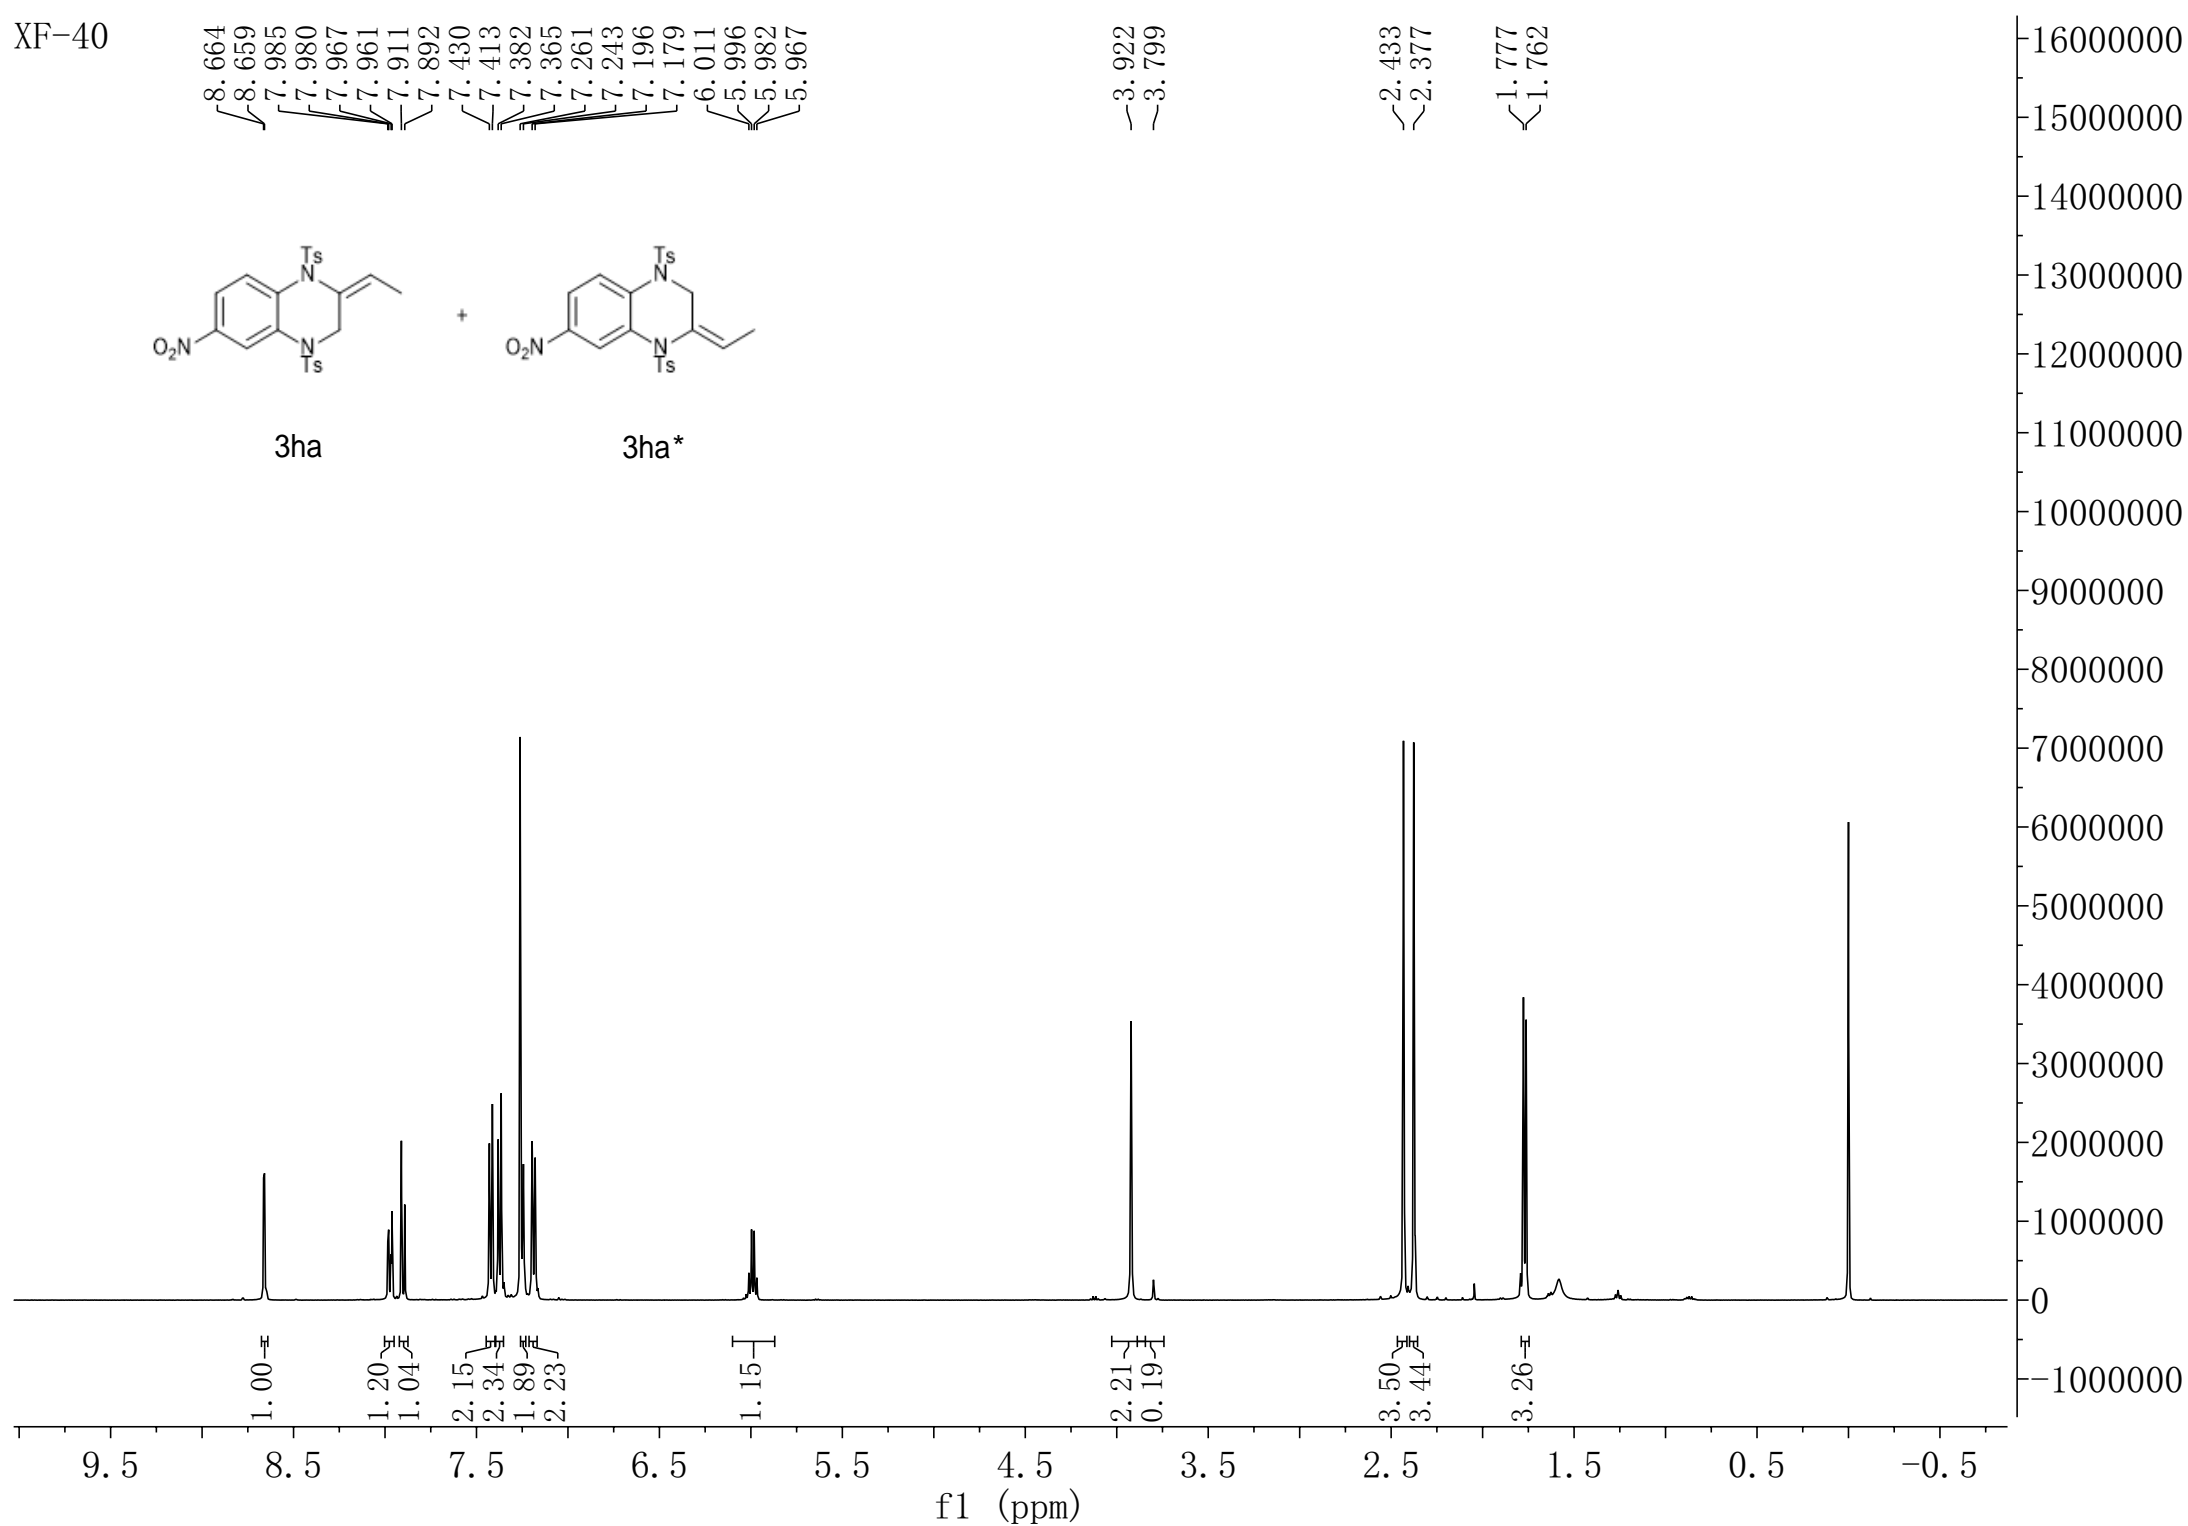

xf-40

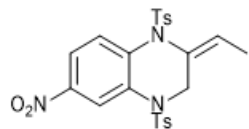

3ha

+

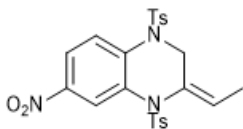

3ha\*

145.3  
145.1  
143.6  
134.8  
134.7  
134.1  
130.1  
129.9  
128.7  
128.6  
127.8  
127.1  
125.3  
121.7  
121.1  
120.4

42.4

21.7  
21.6

13.6

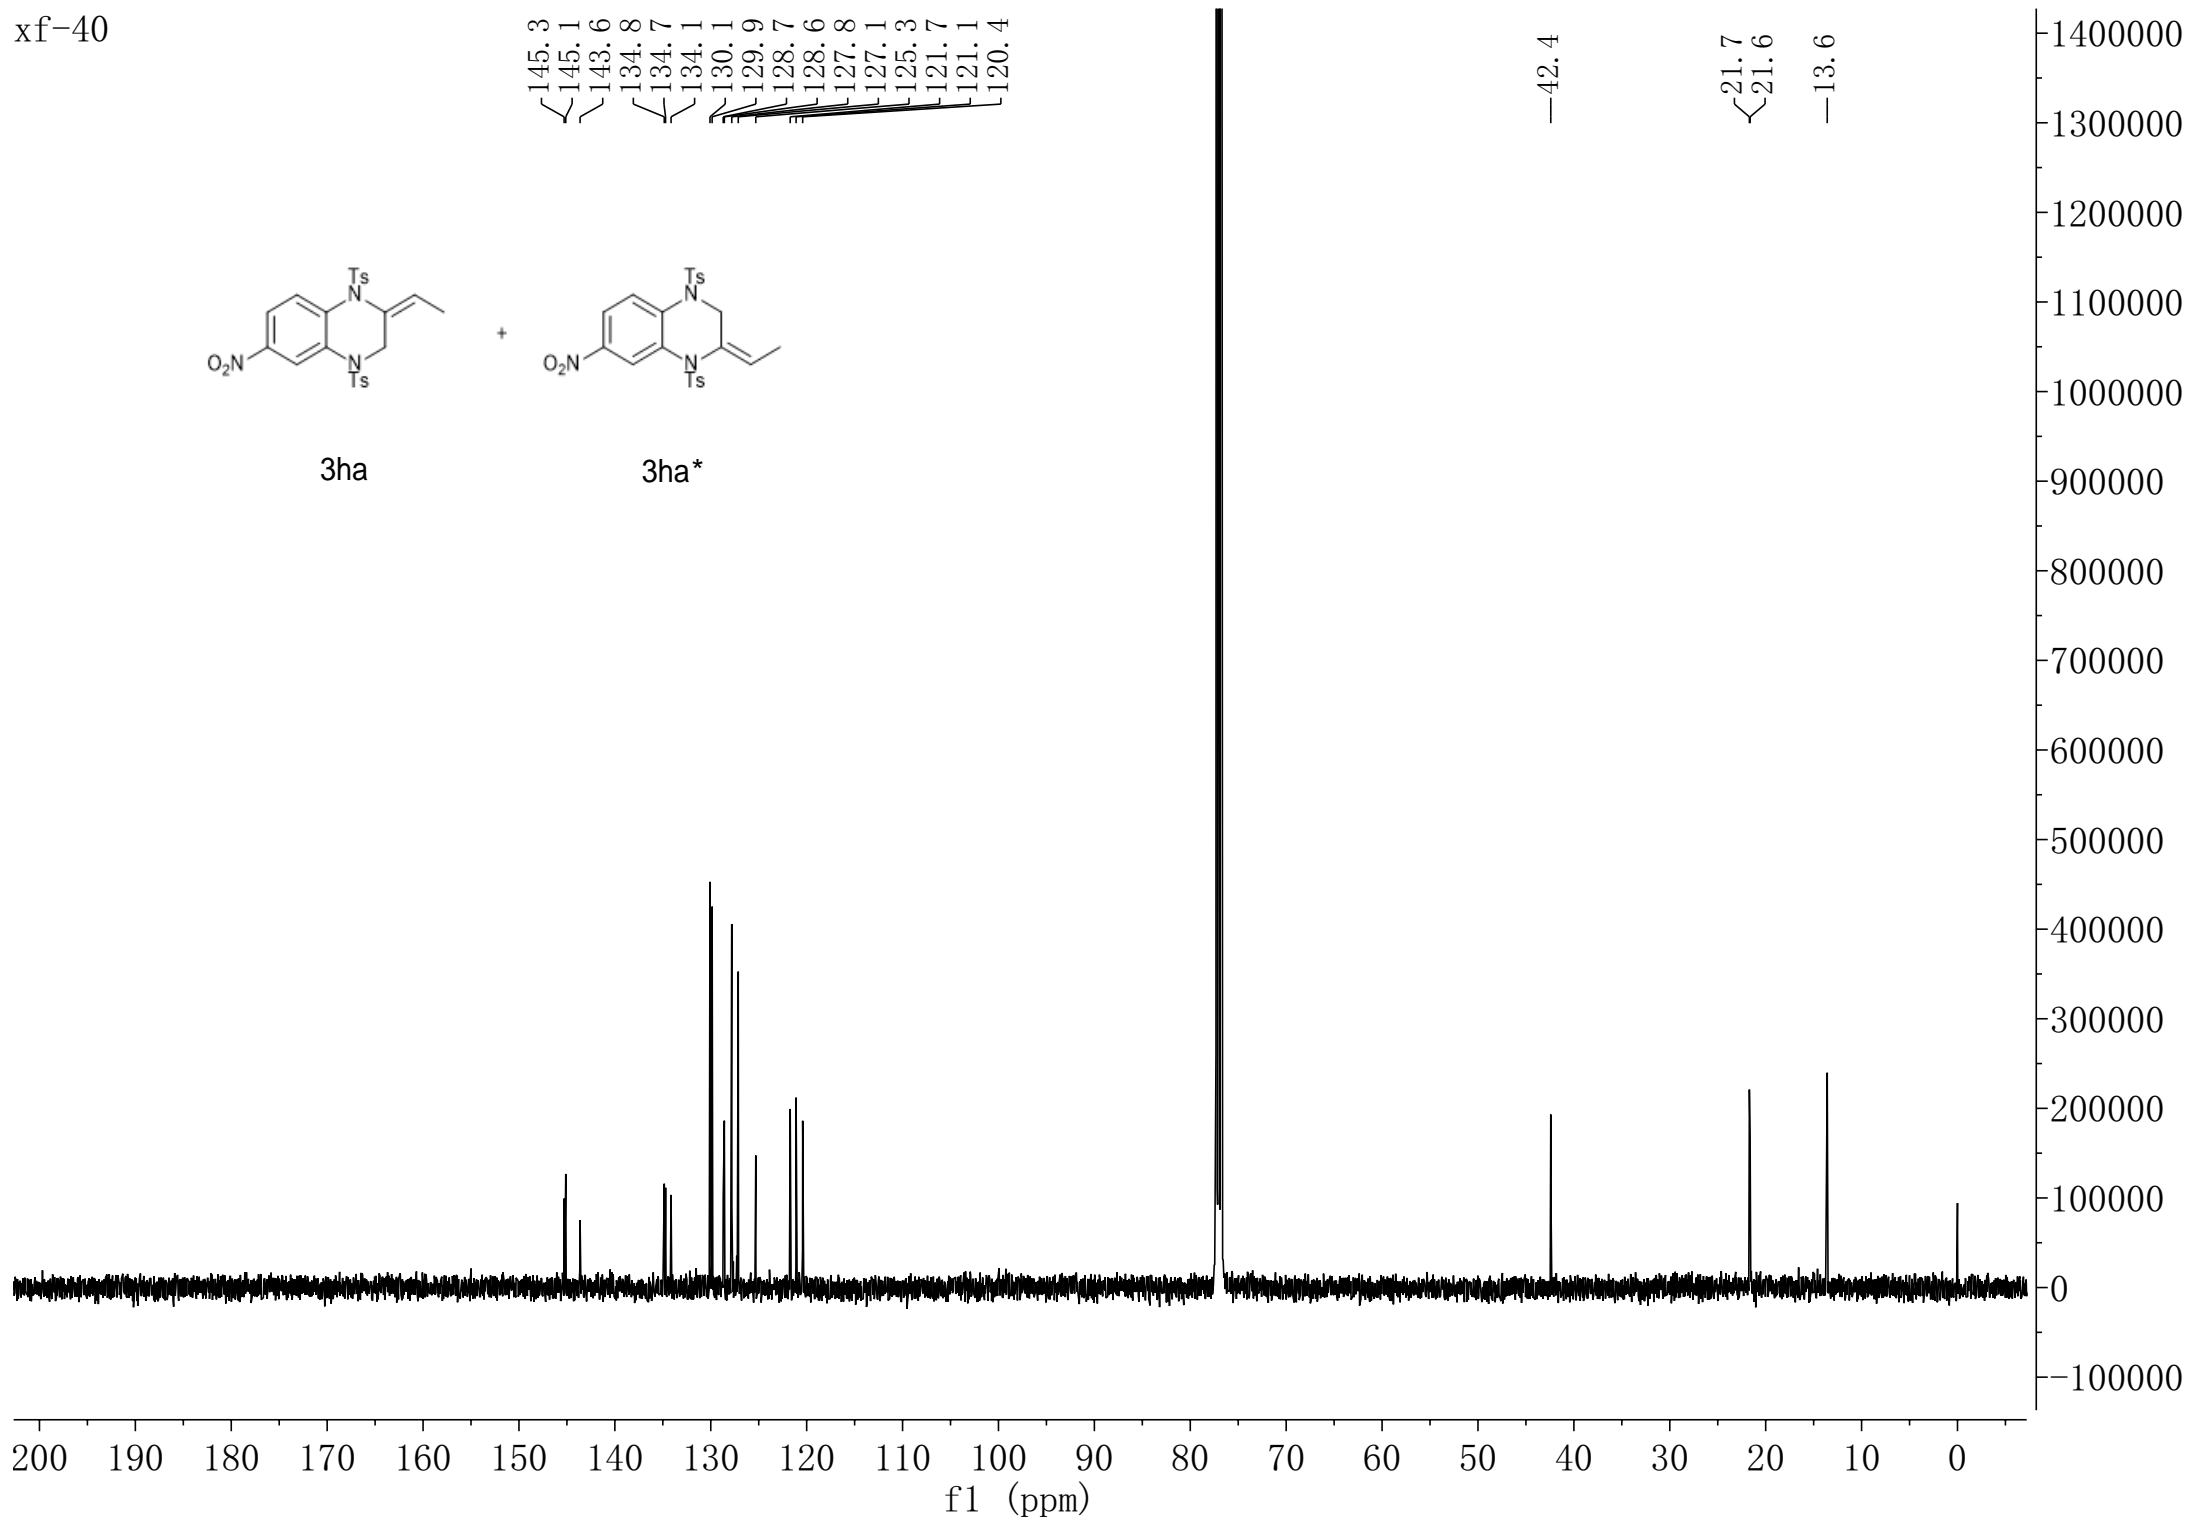

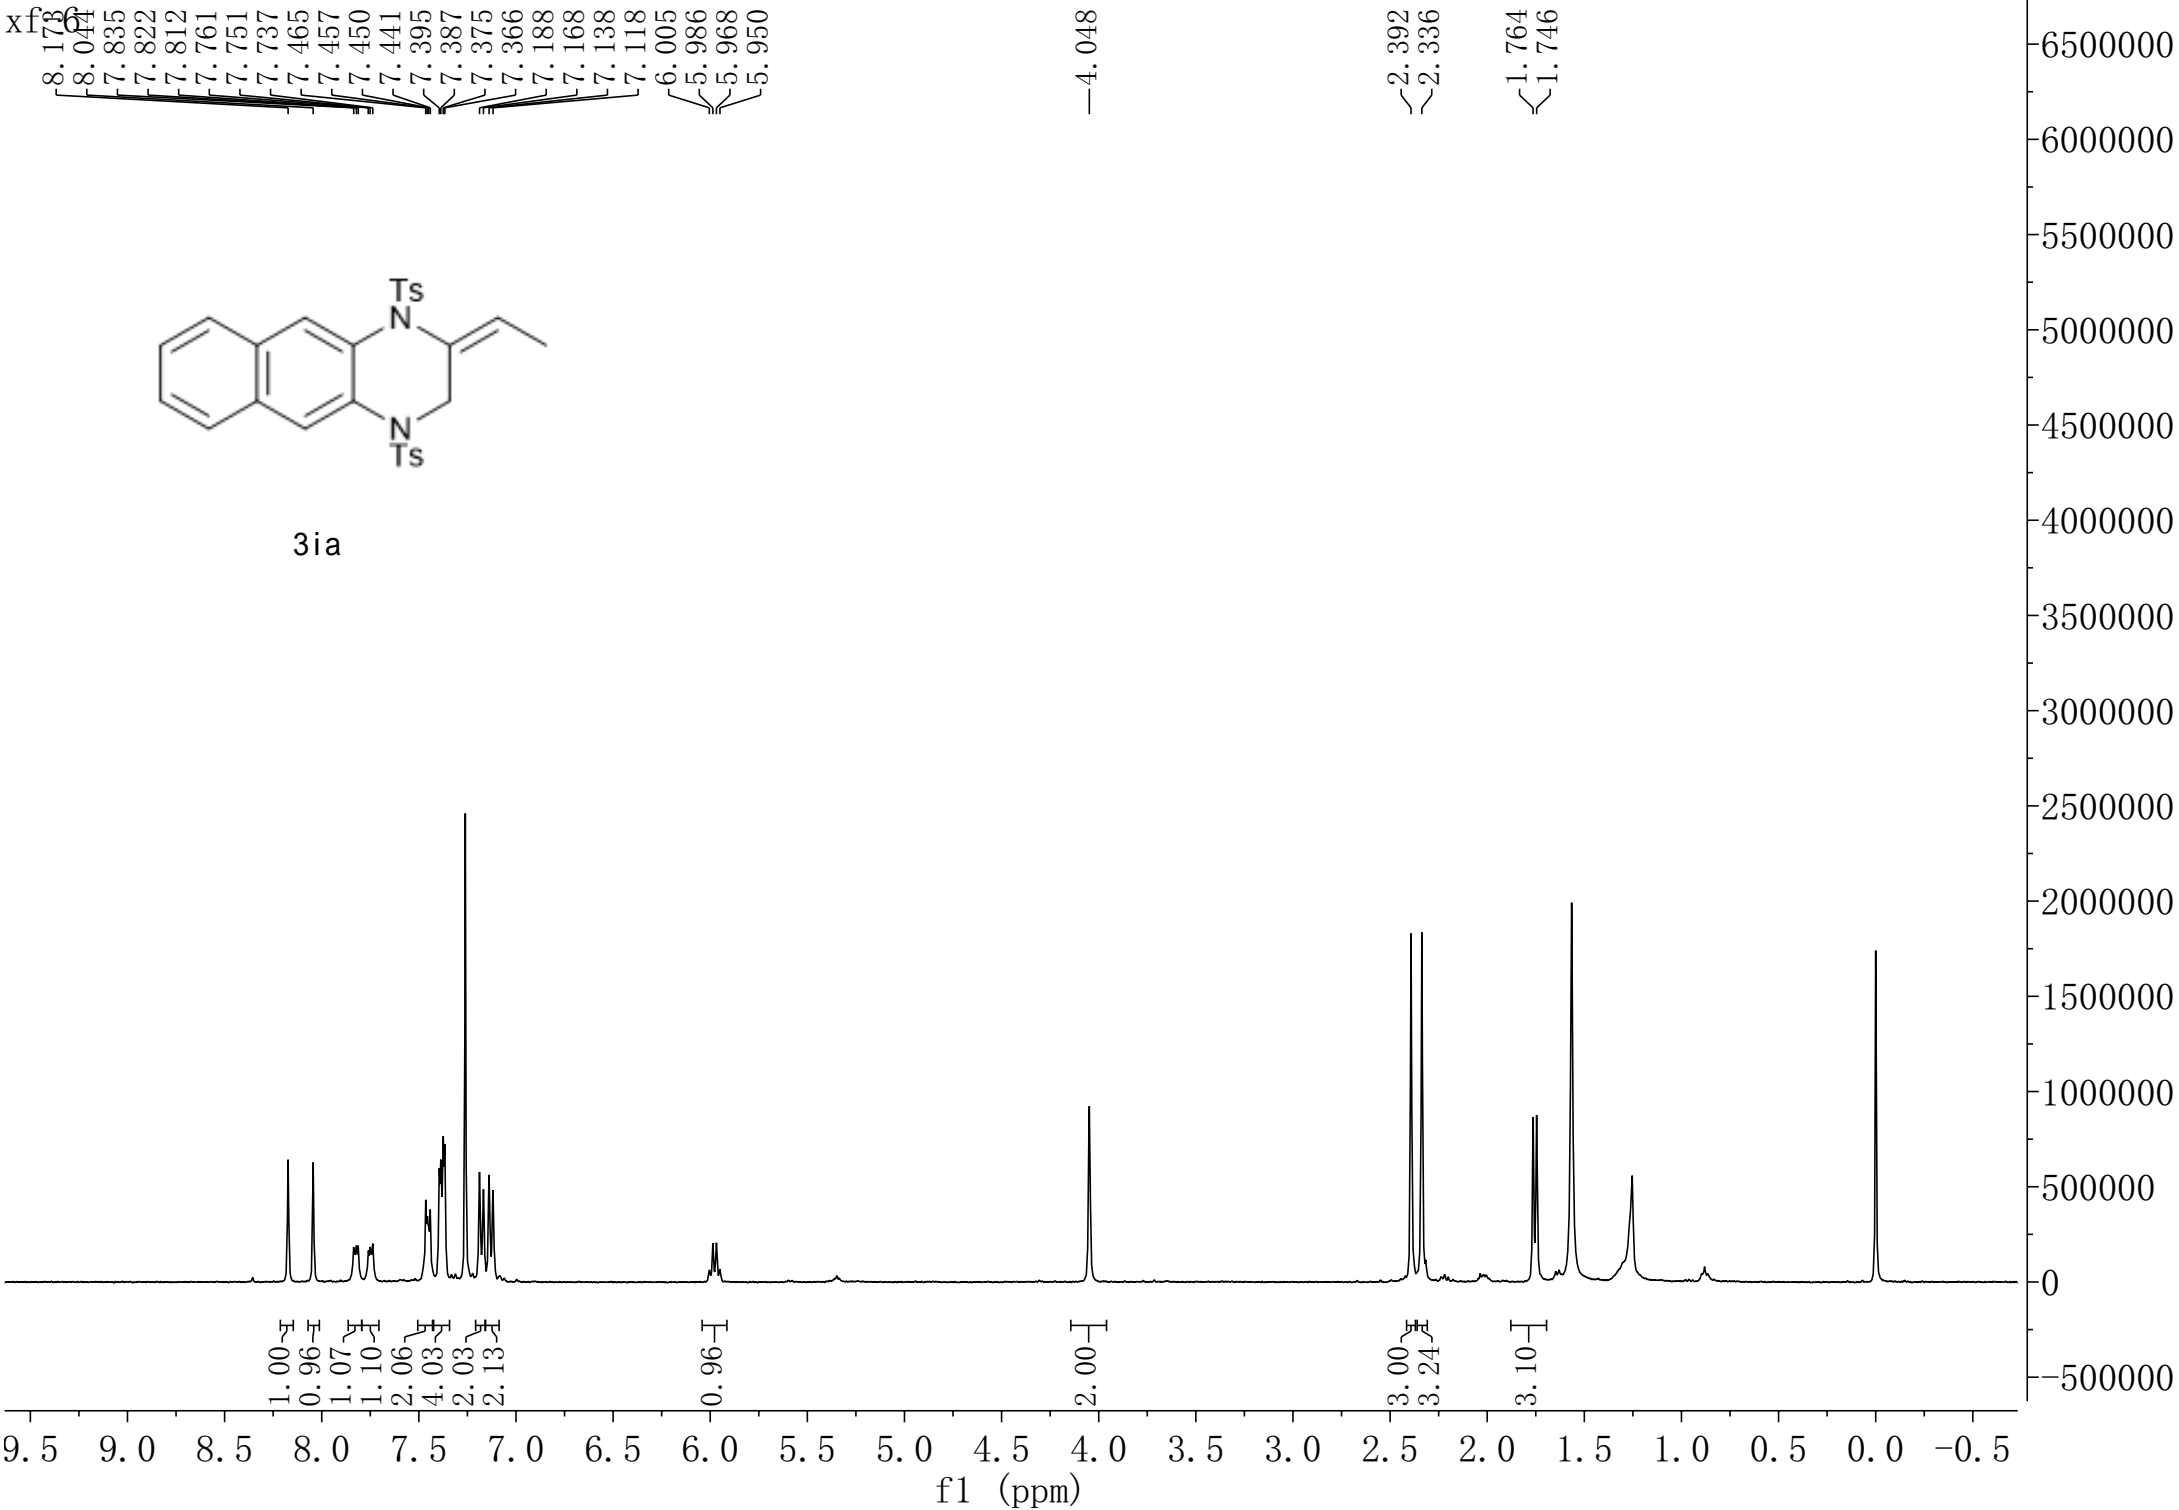

xf-6

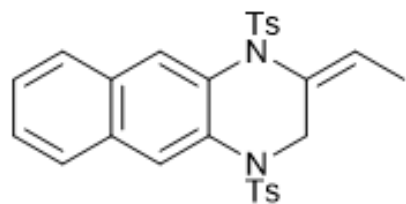

3ia

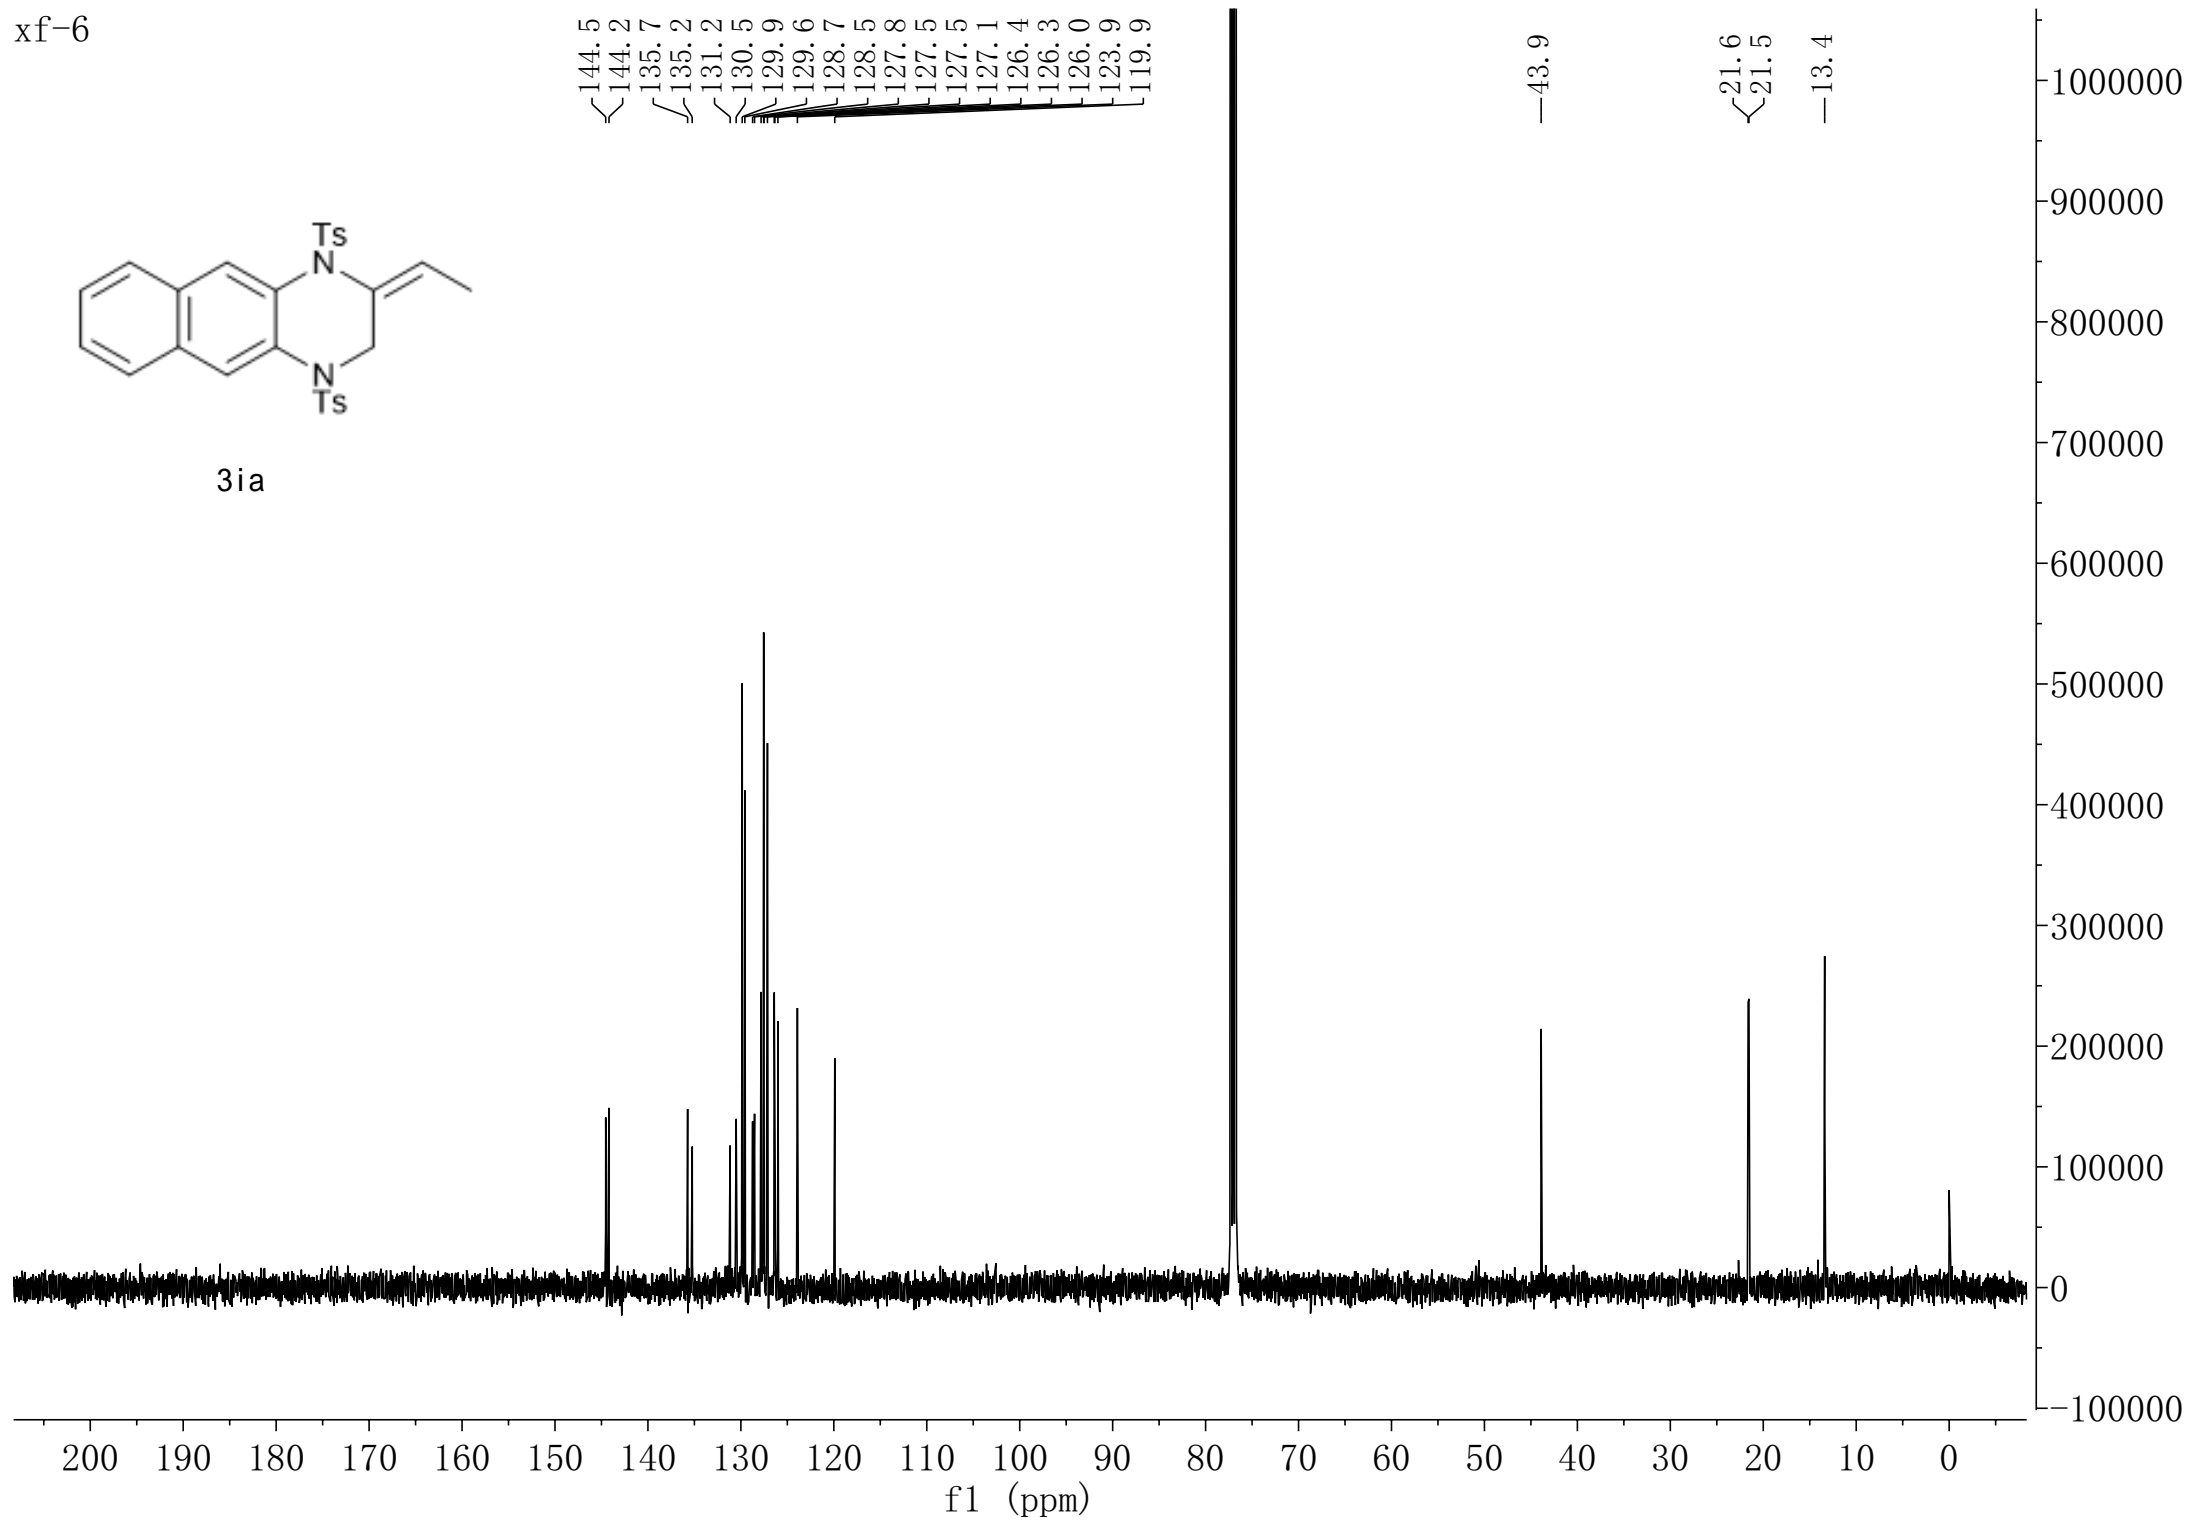



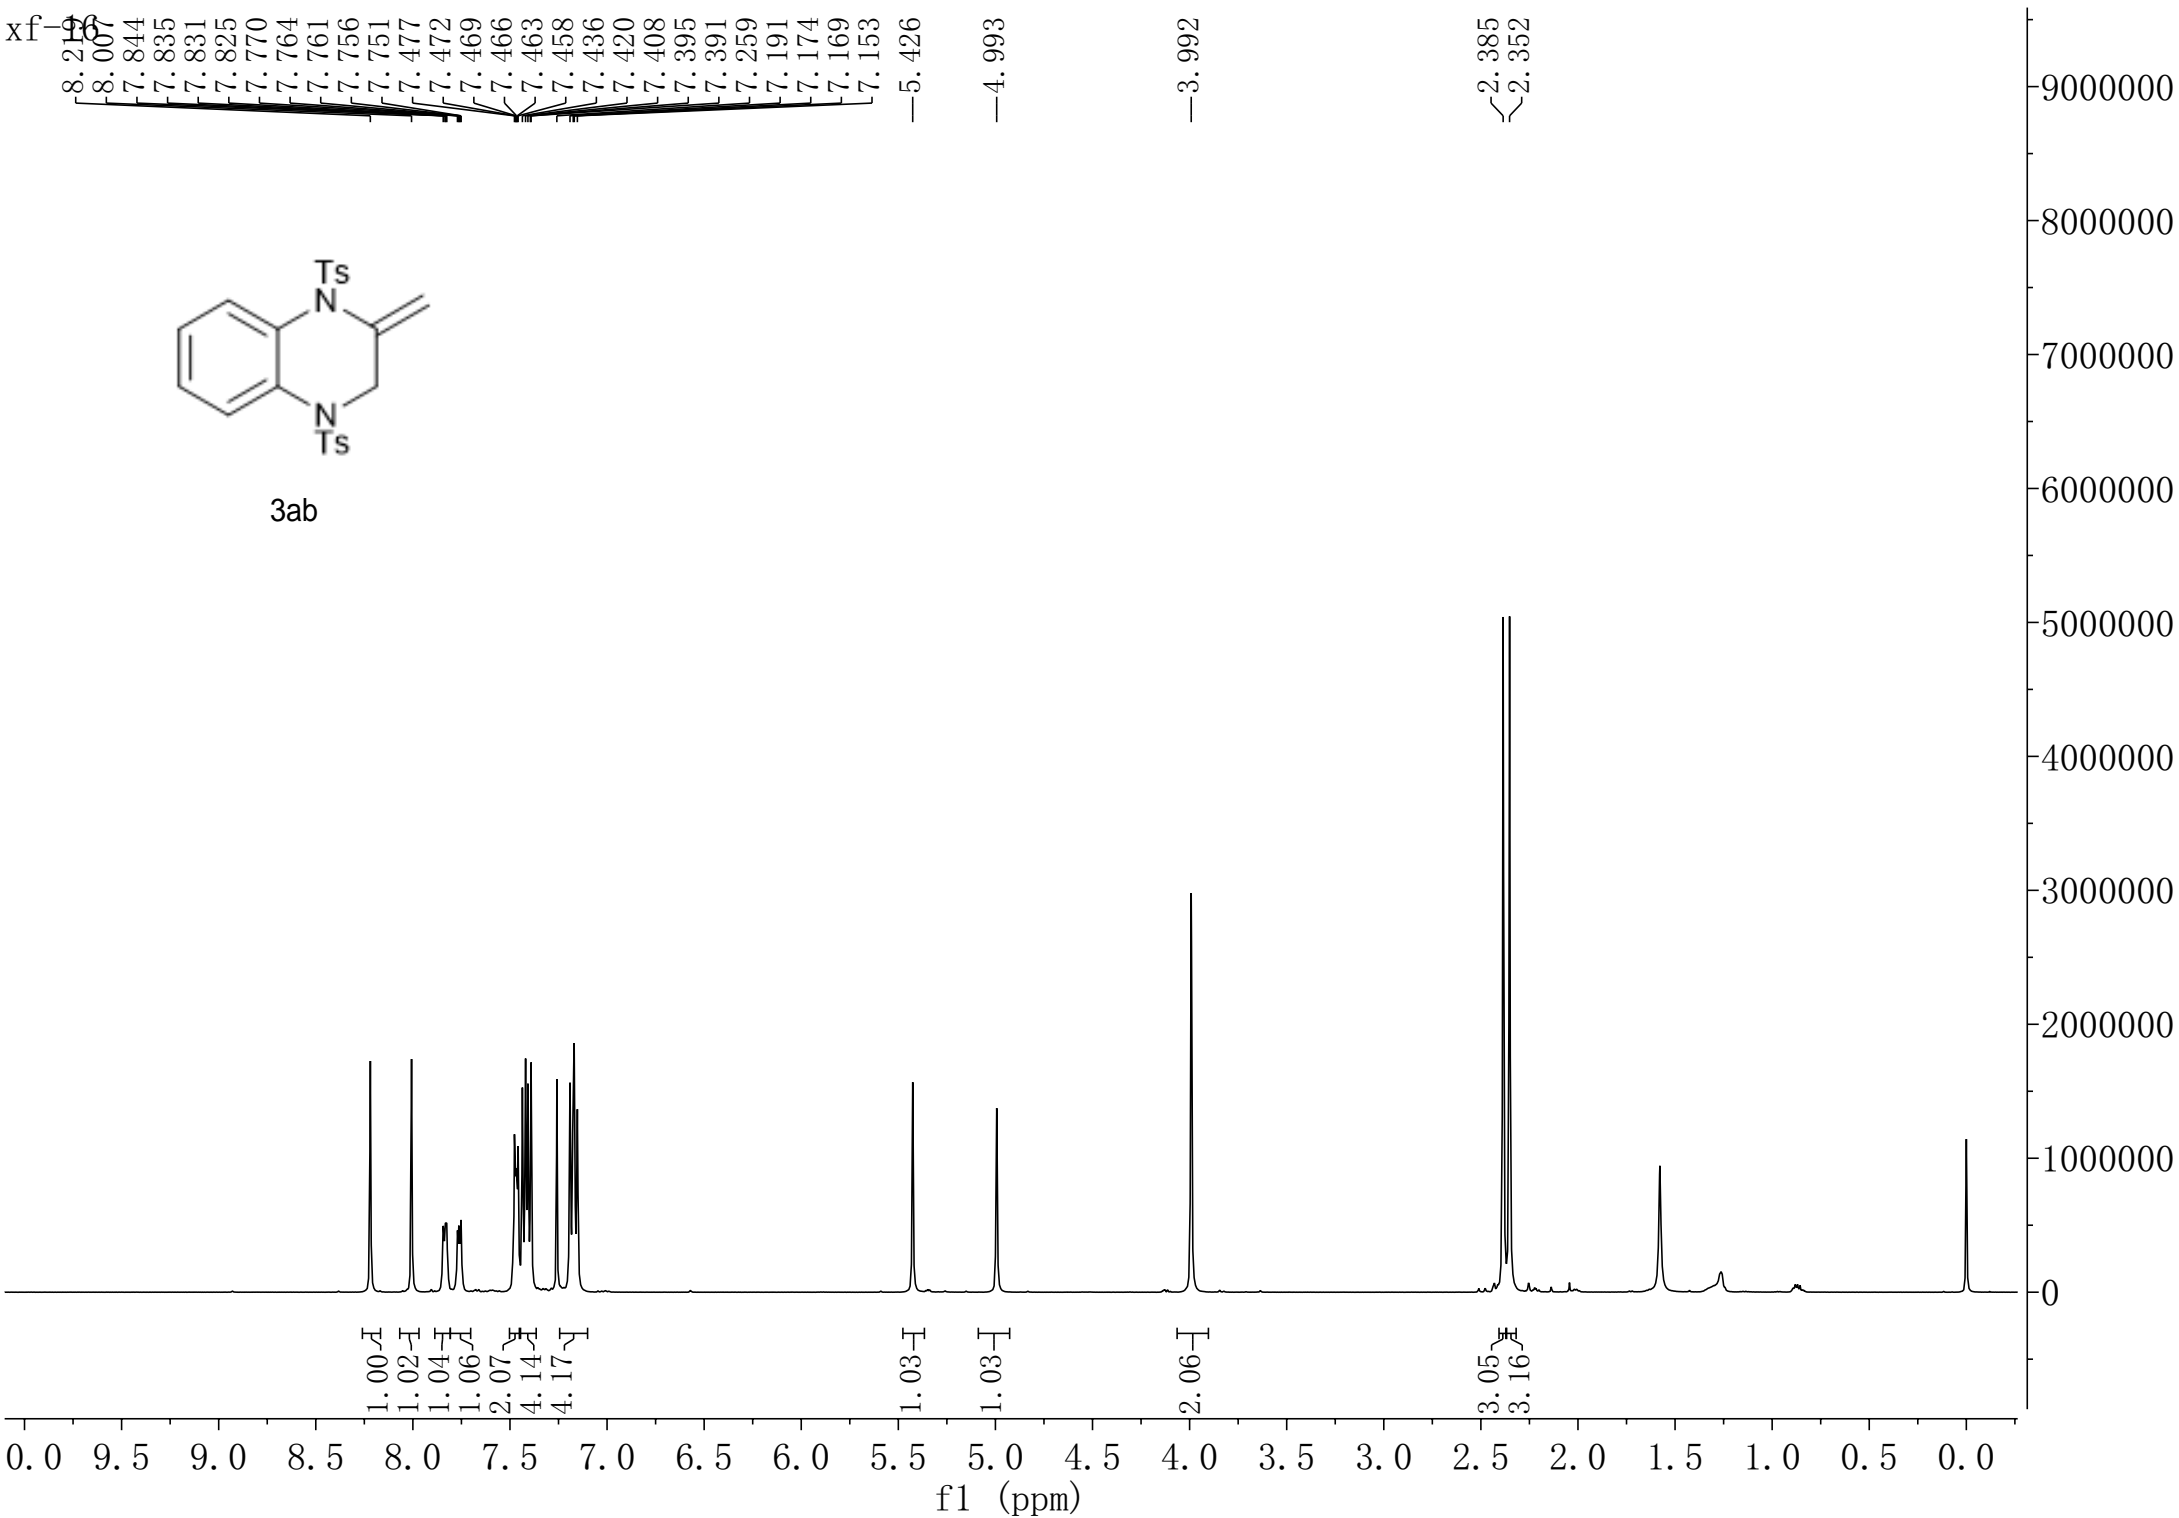

xf-1

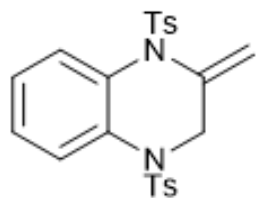

3ab

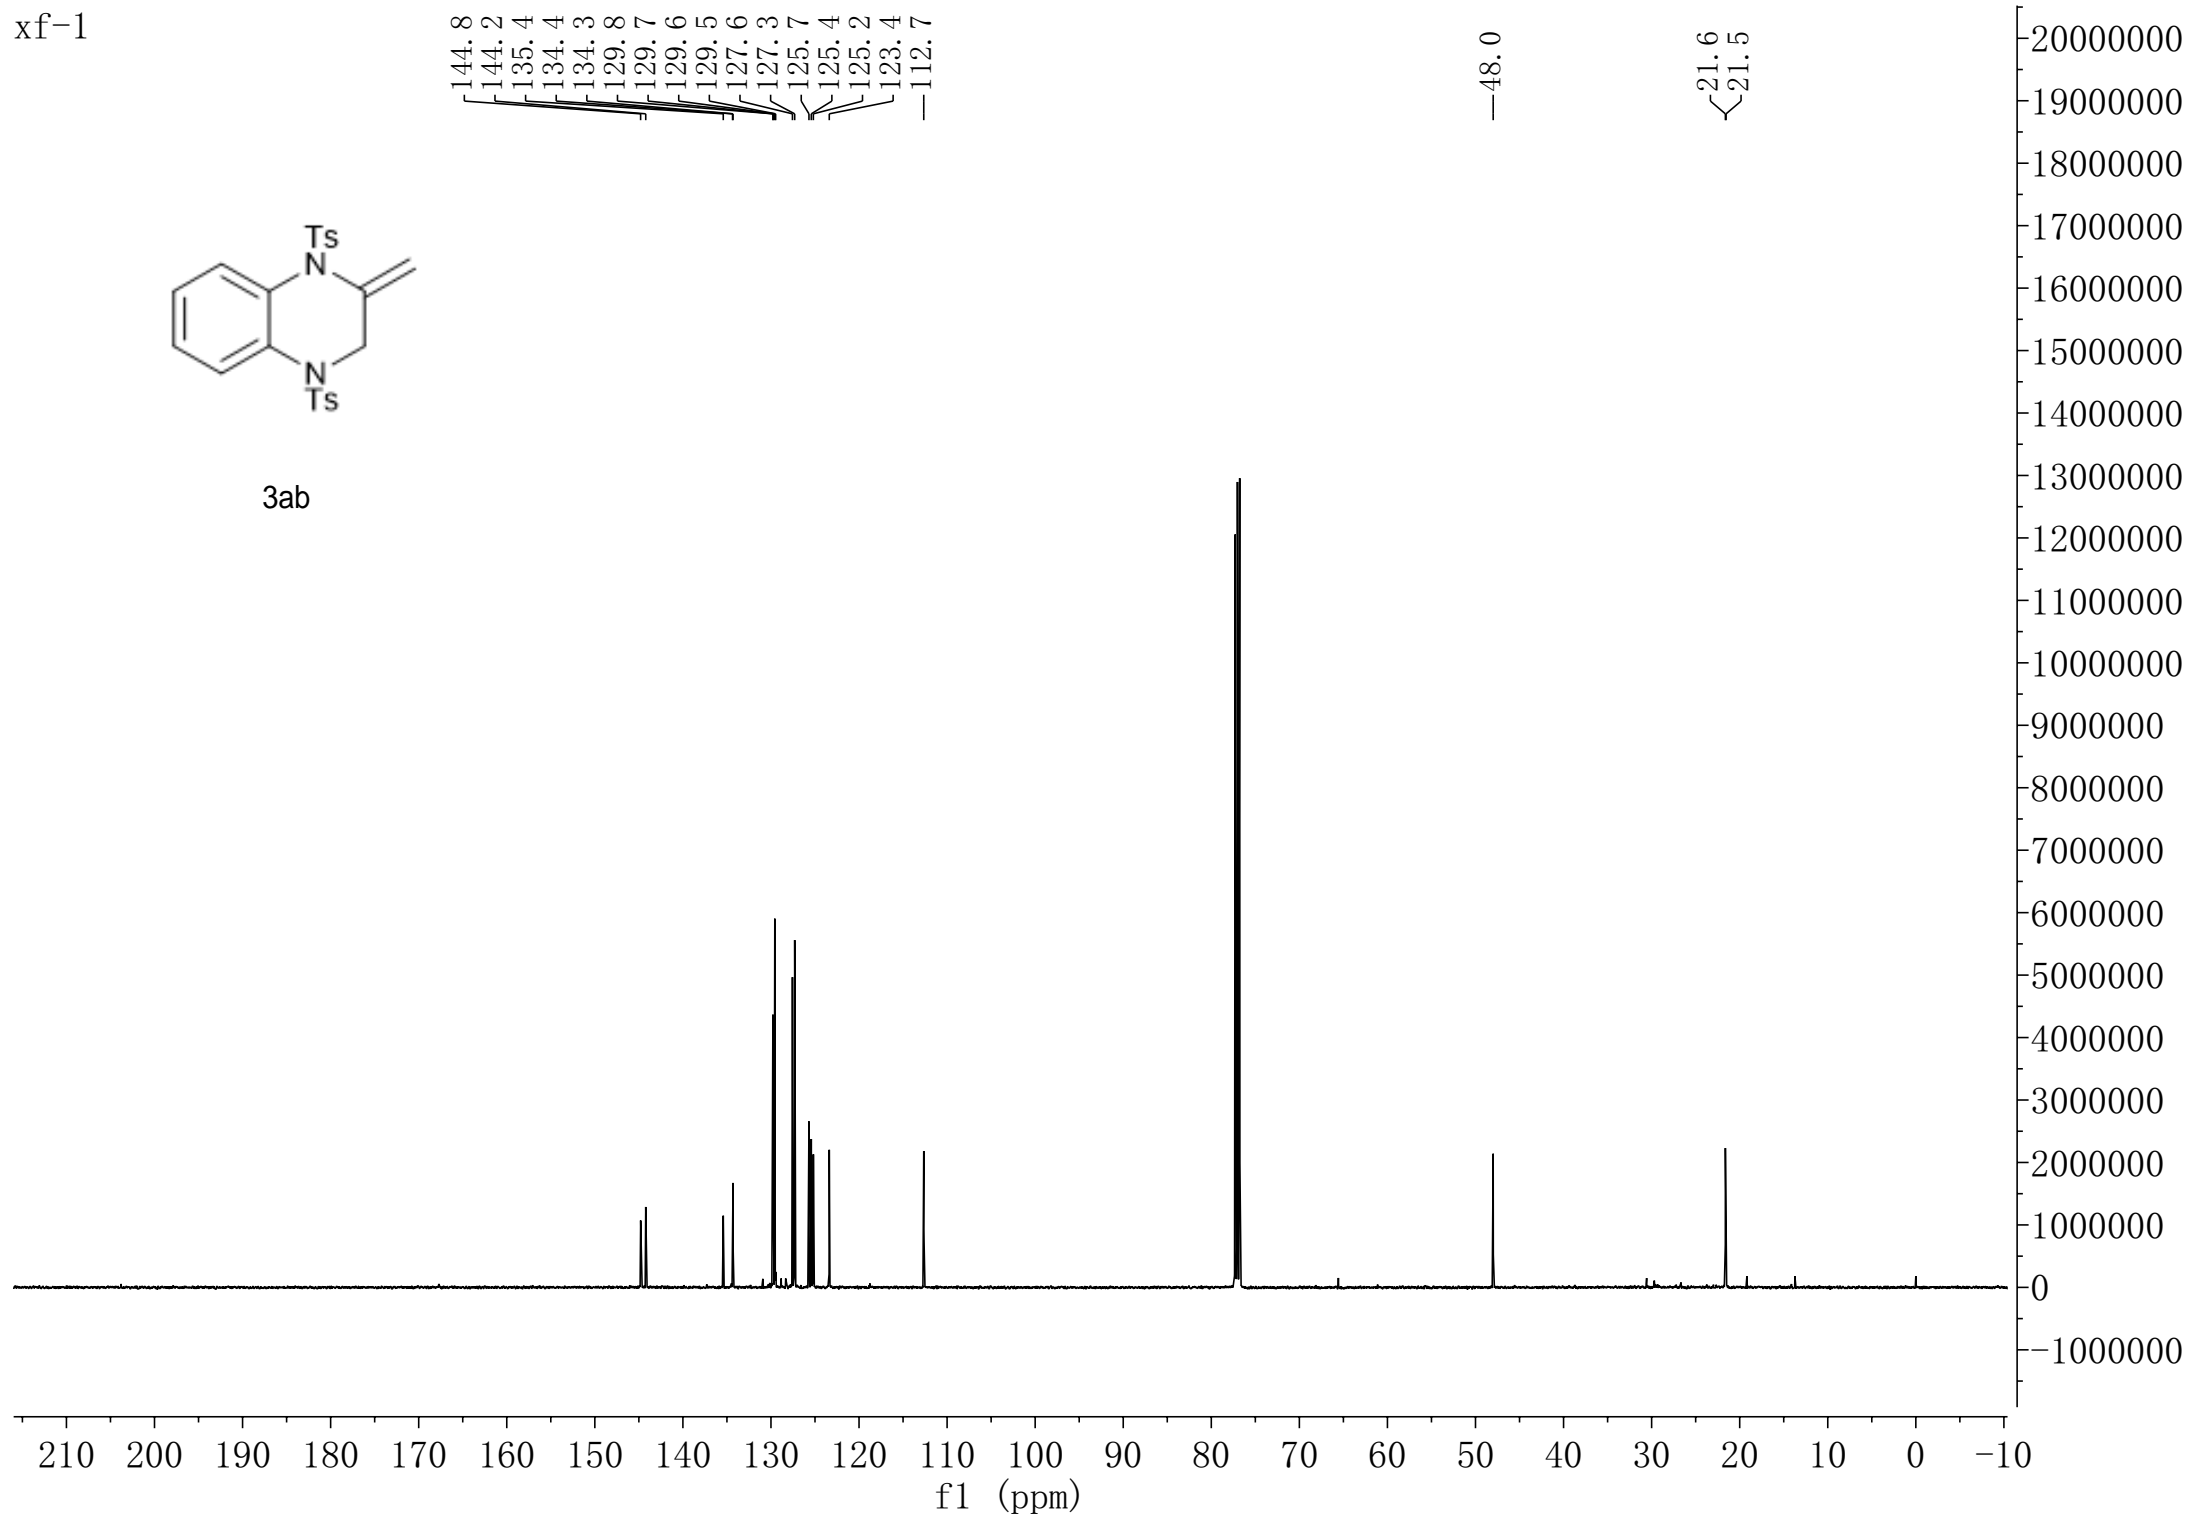

xf-30

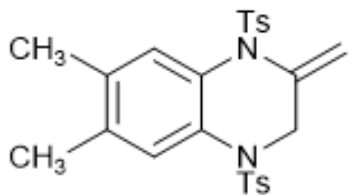

3bb

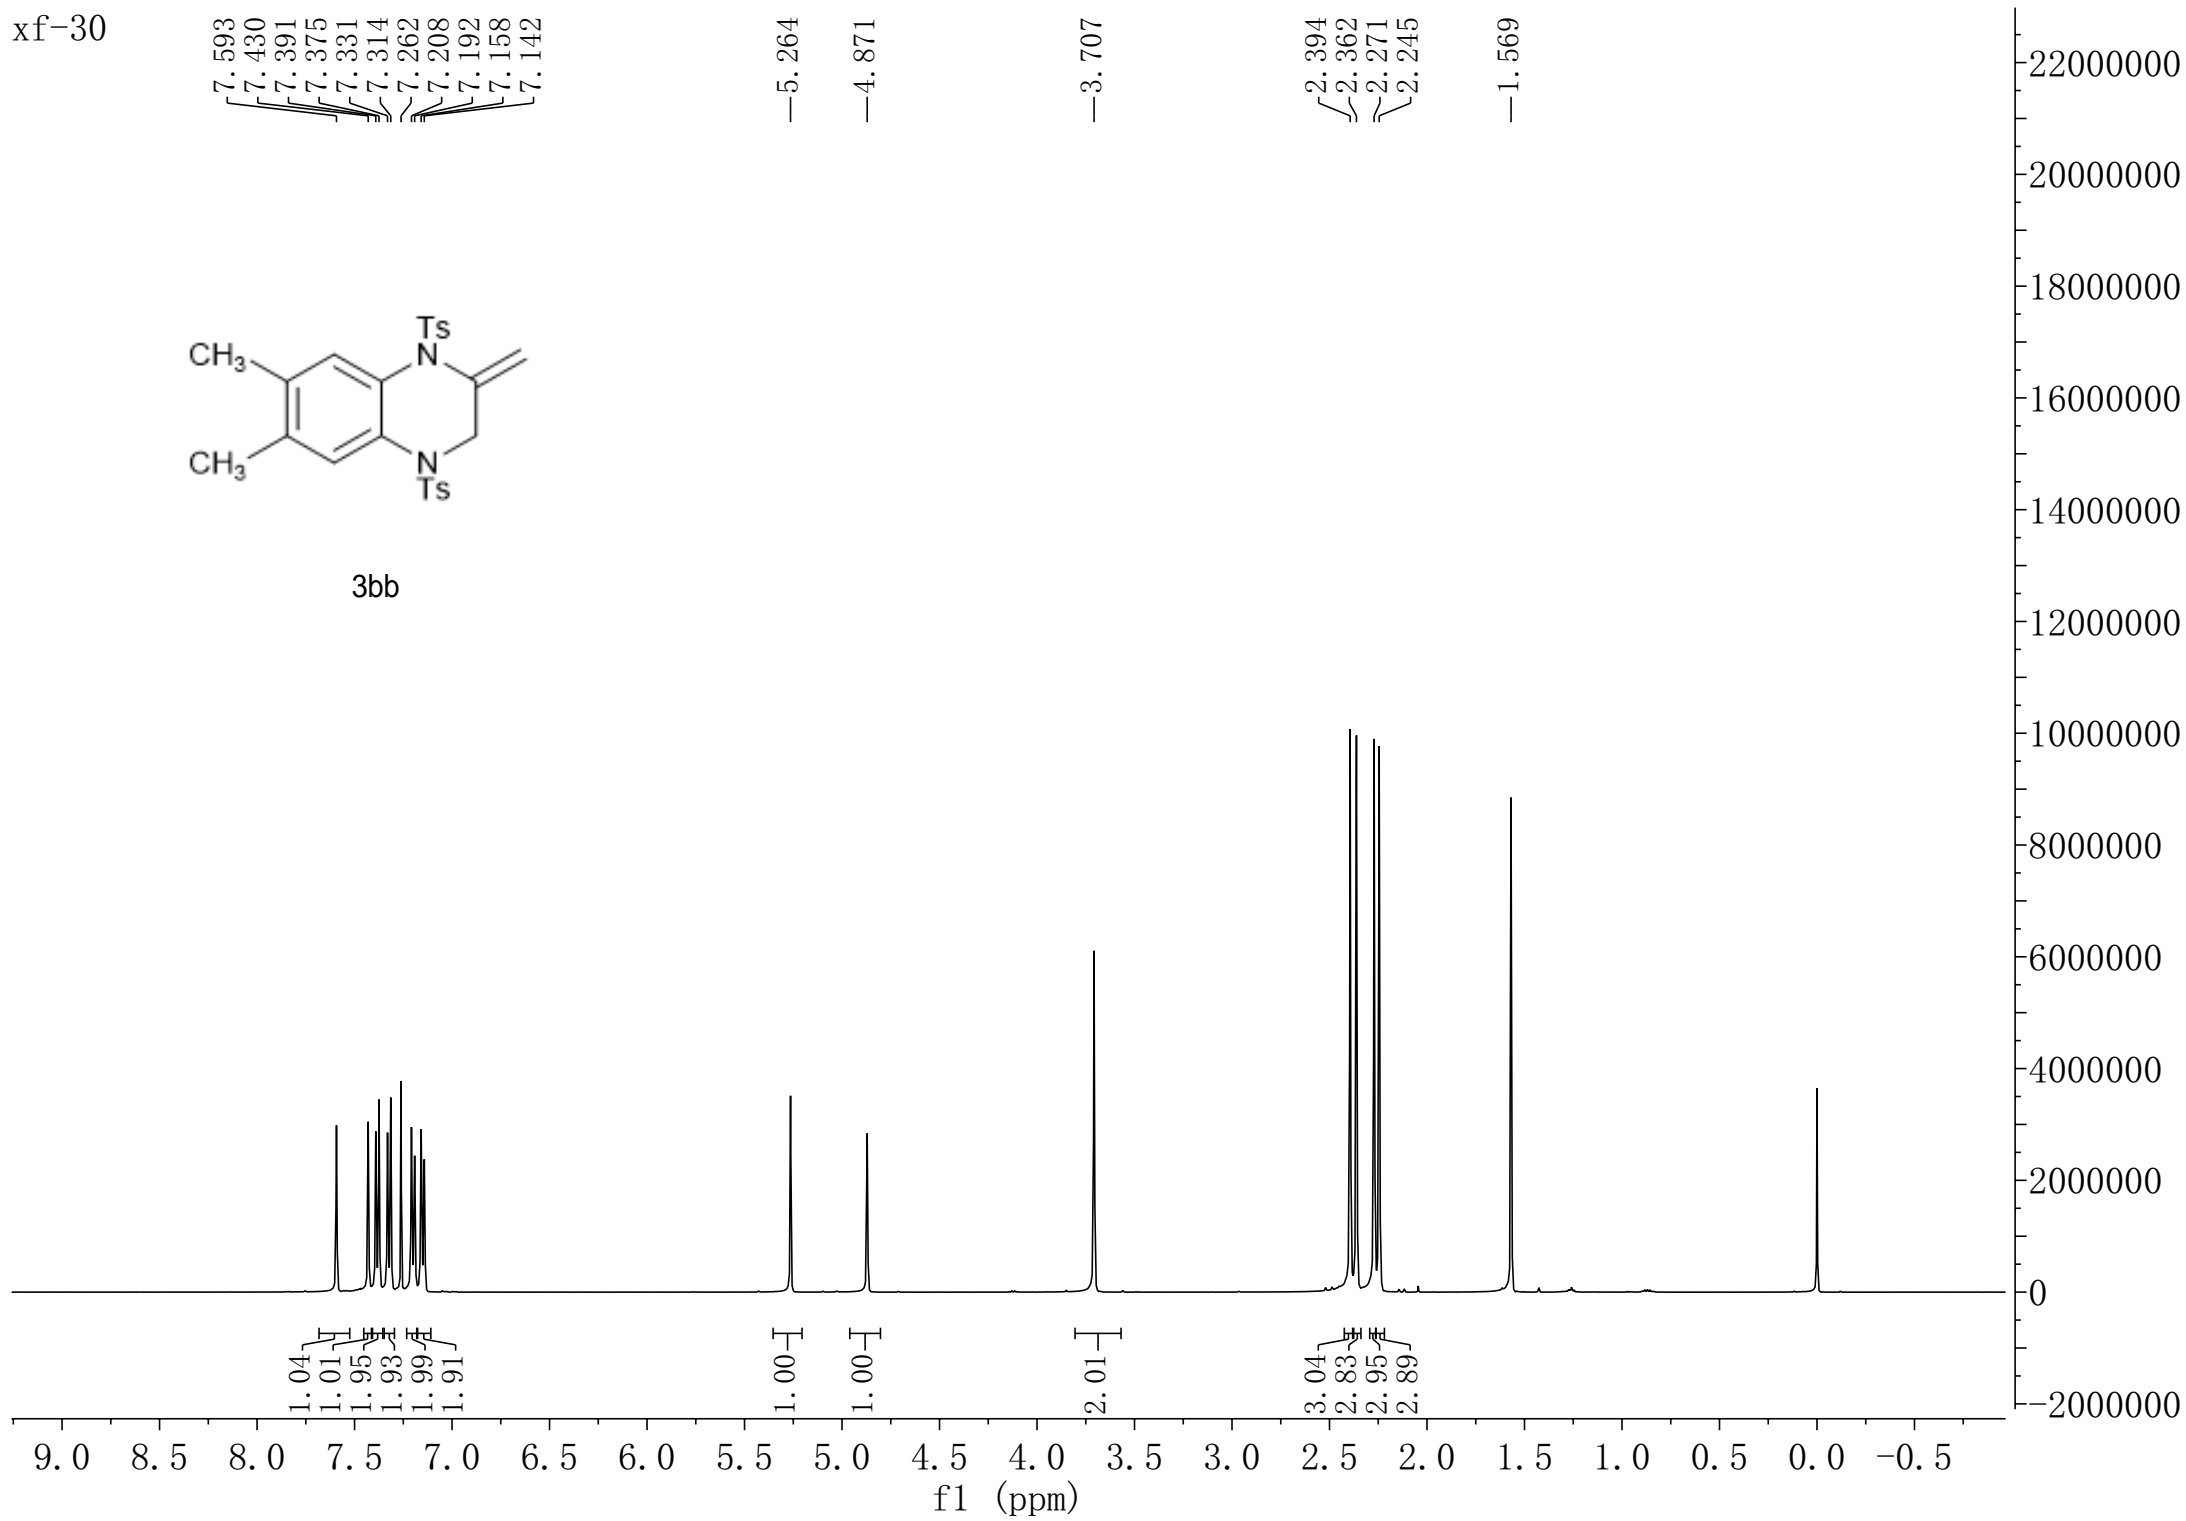

xf-30

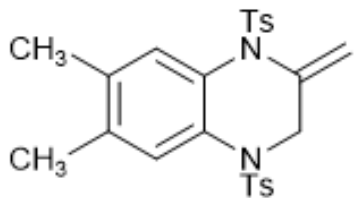

3bb

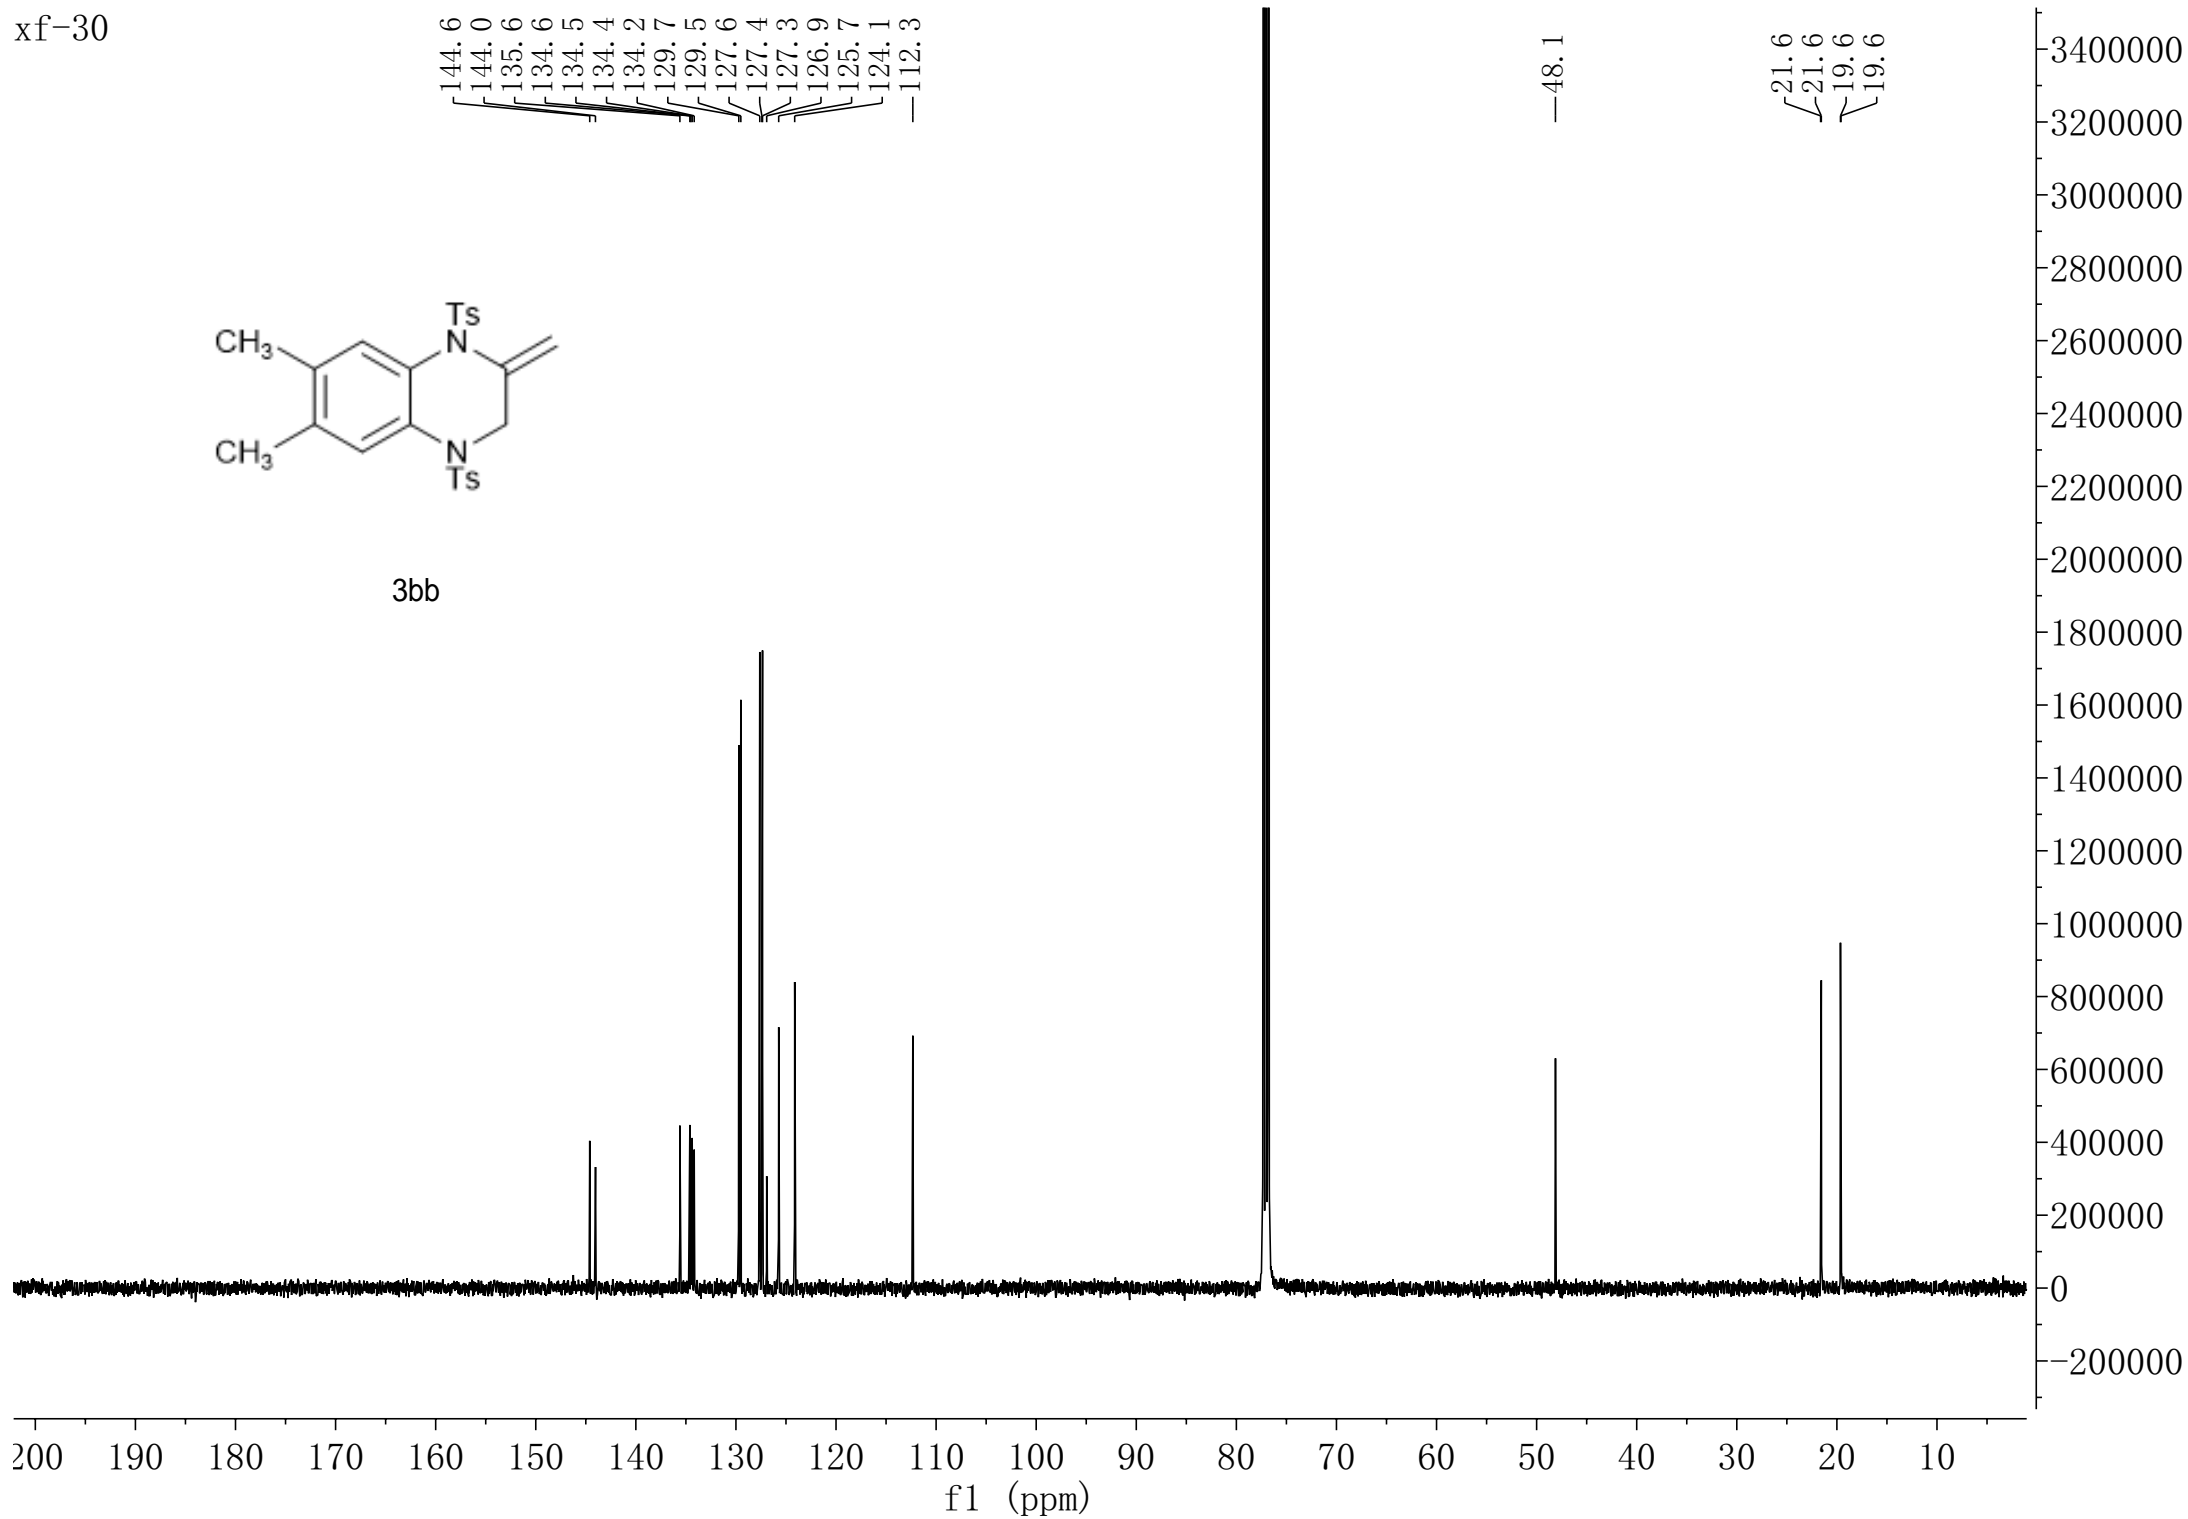

xf-31

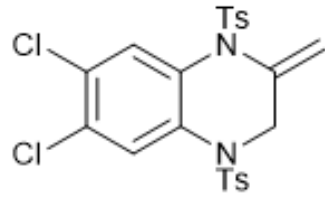

3db

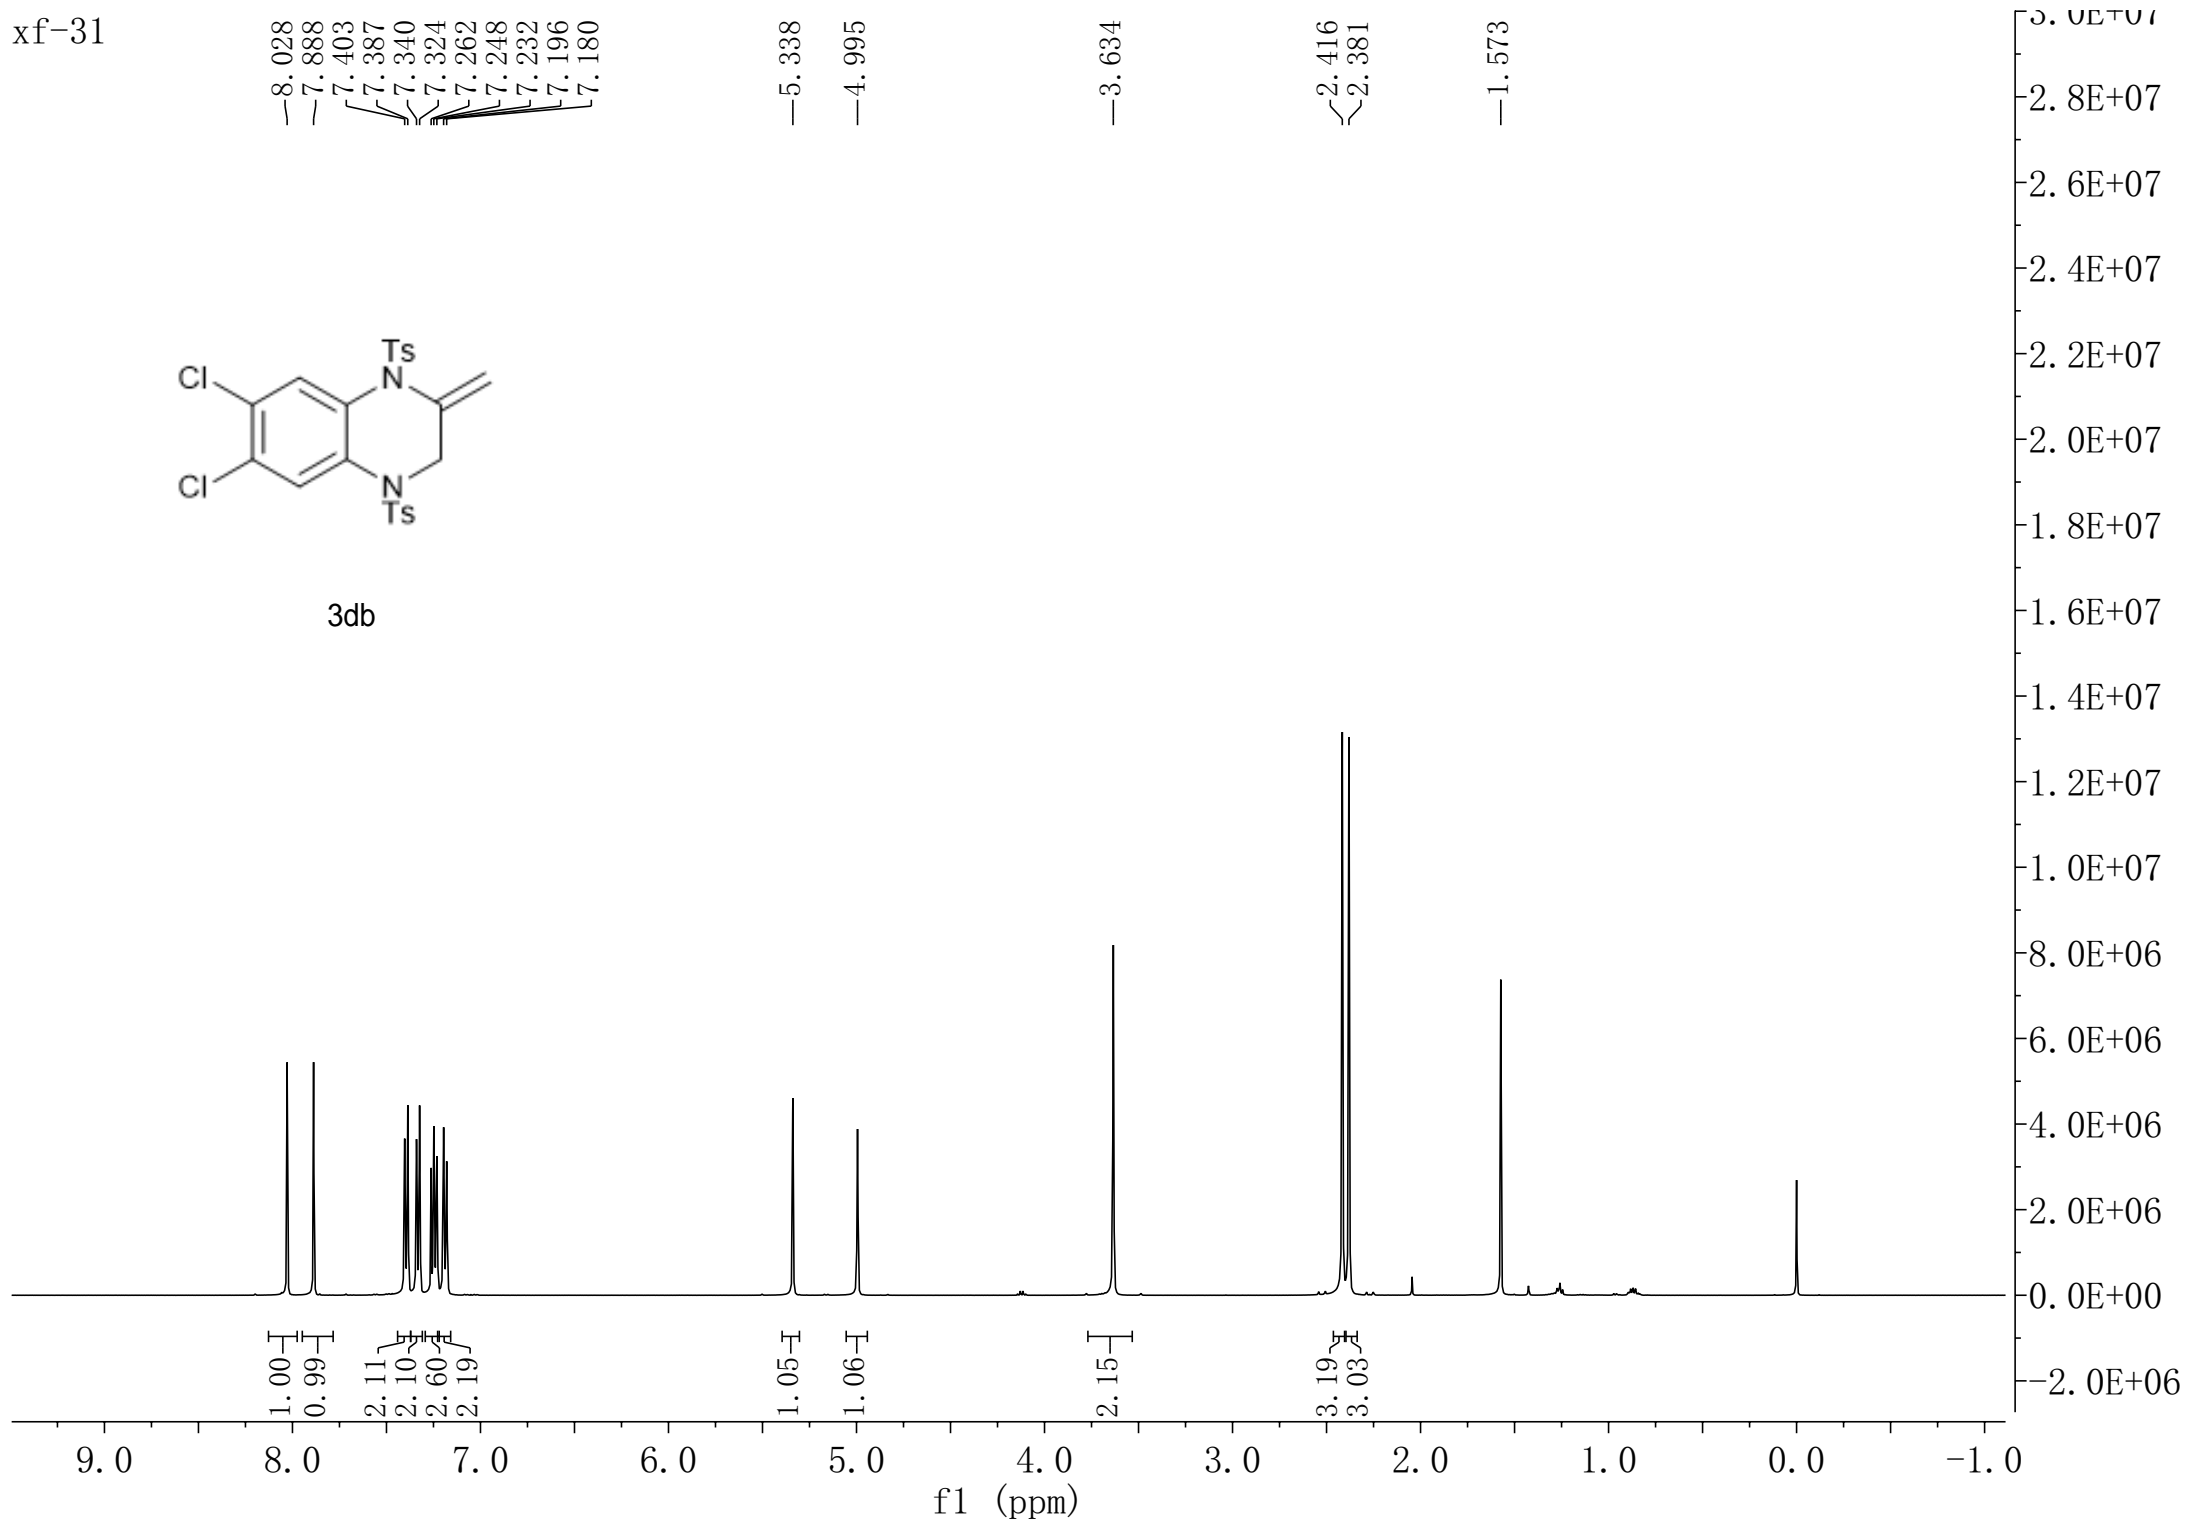

xf-31

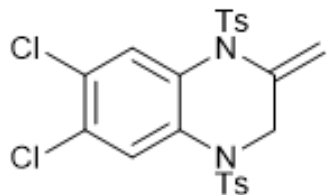

3db

145.4  
144.8  
134.7  
133.7  
132.5  
130.0  
129.8  
129.1  
129.0  
128.5  
128.0  
127.7  
127.4  
125.6  
124.6  
115.0

47.0

21.7  
21.6

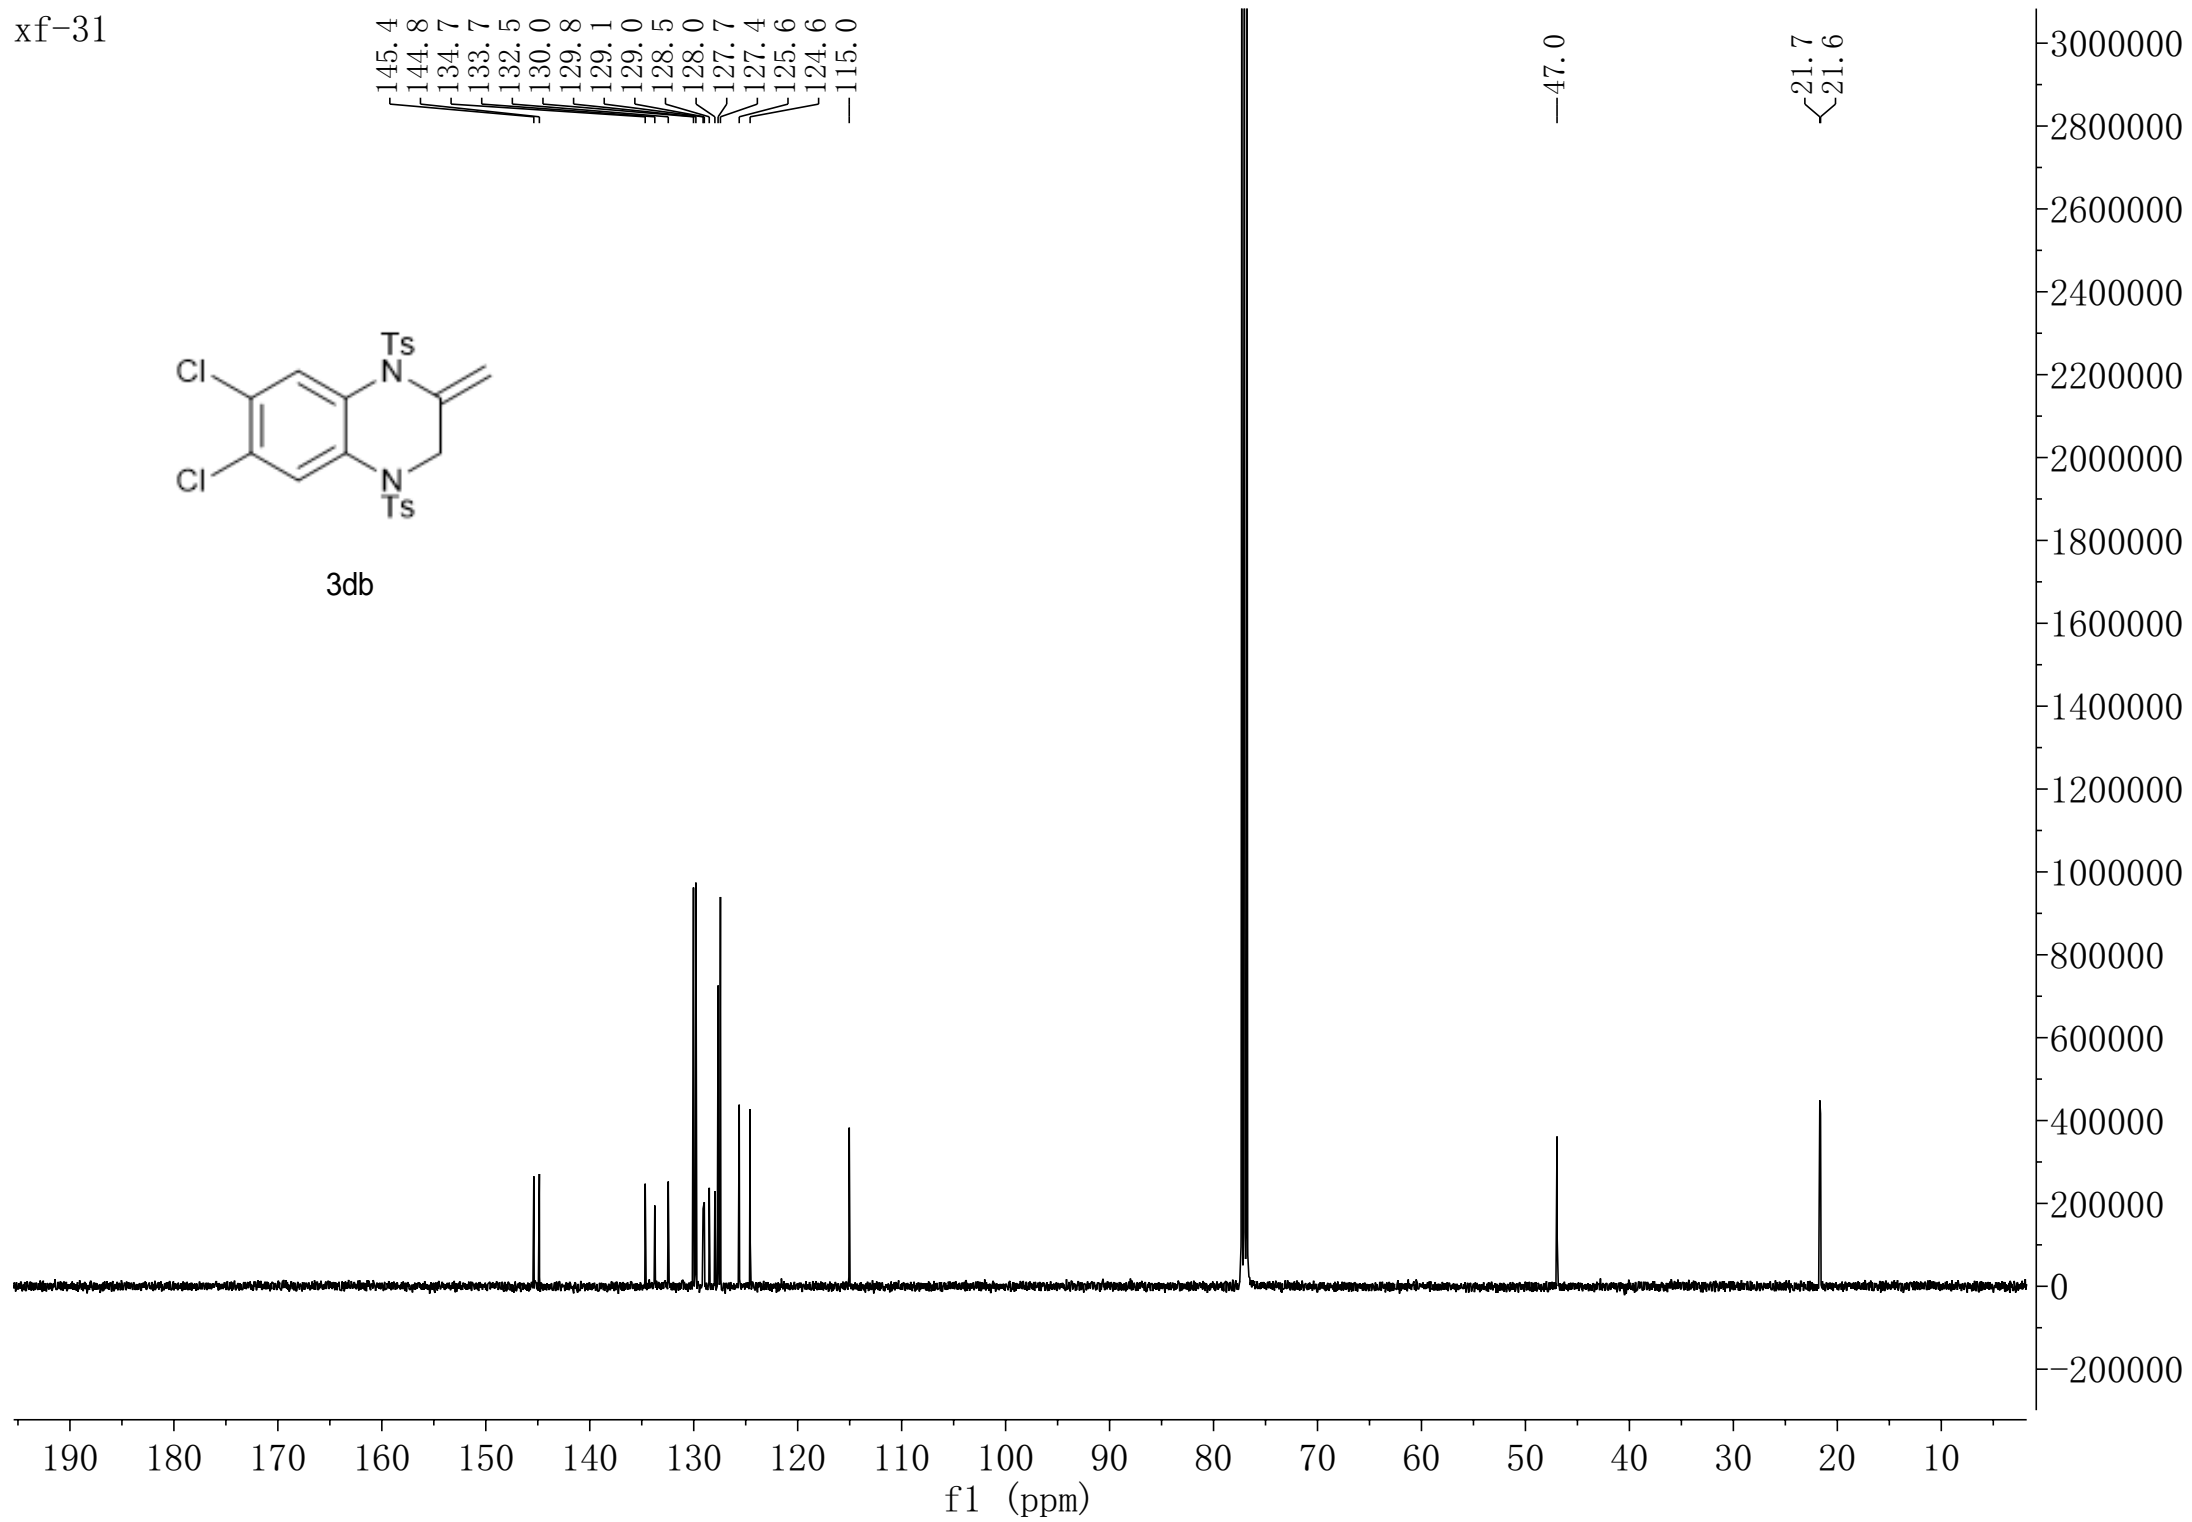

xf-32

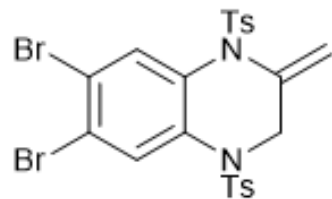

3eb

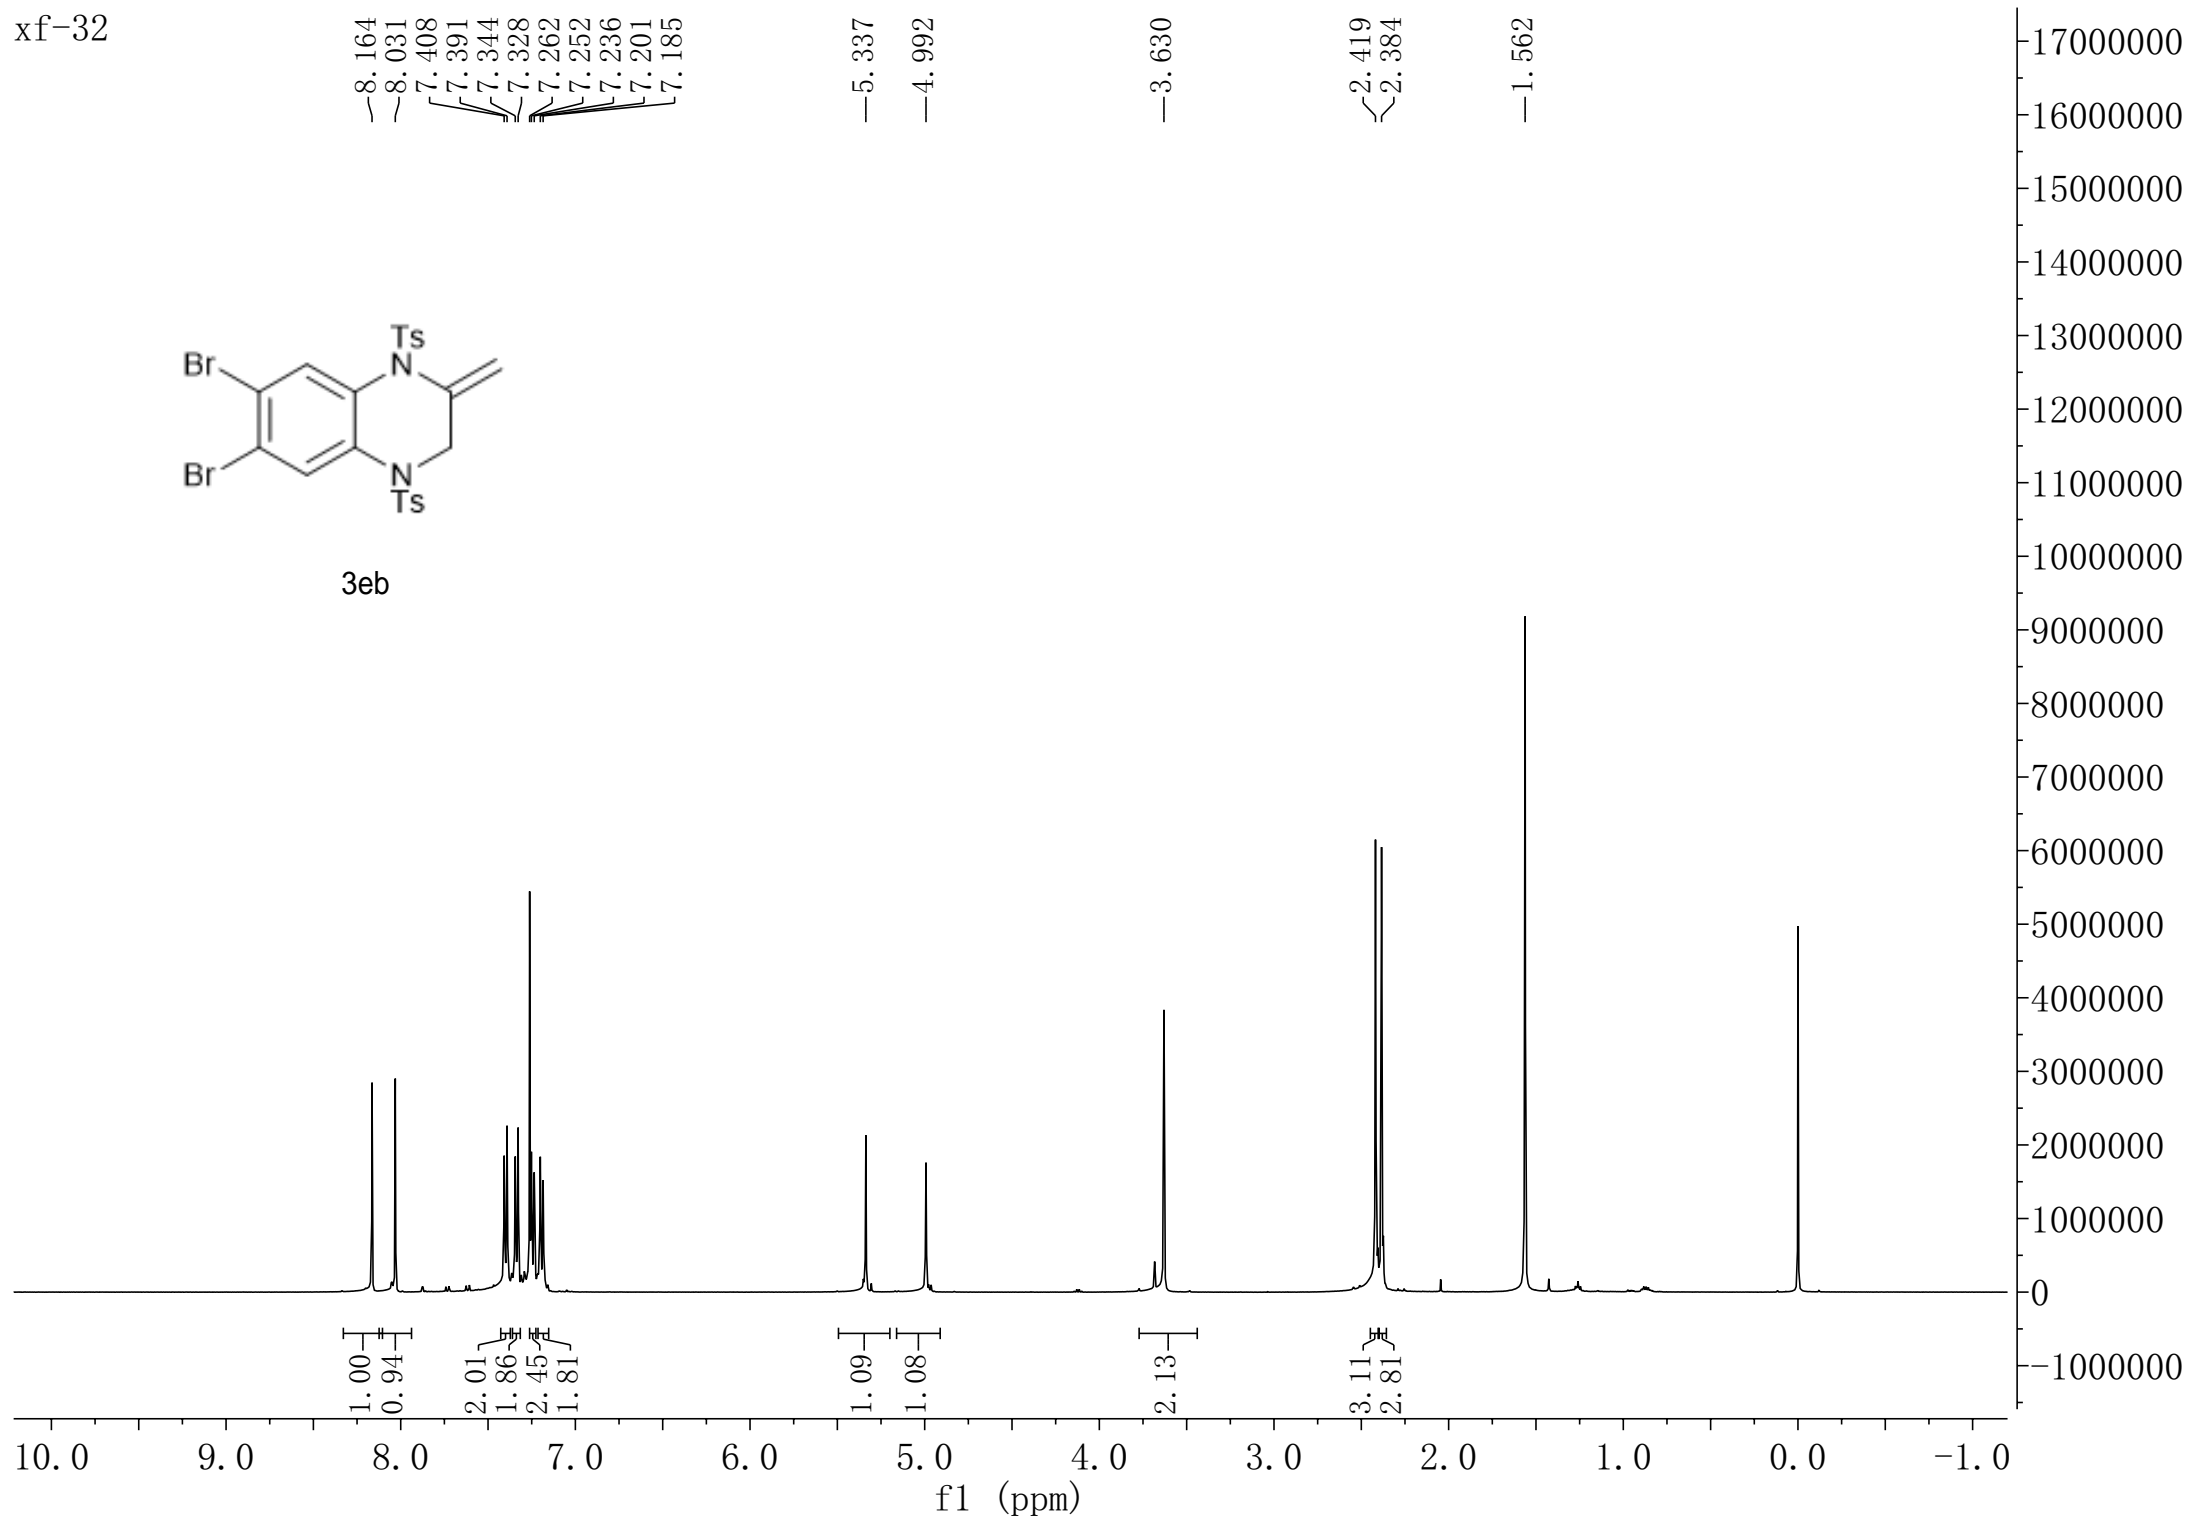

xf-32

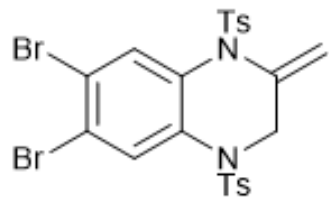

3eb

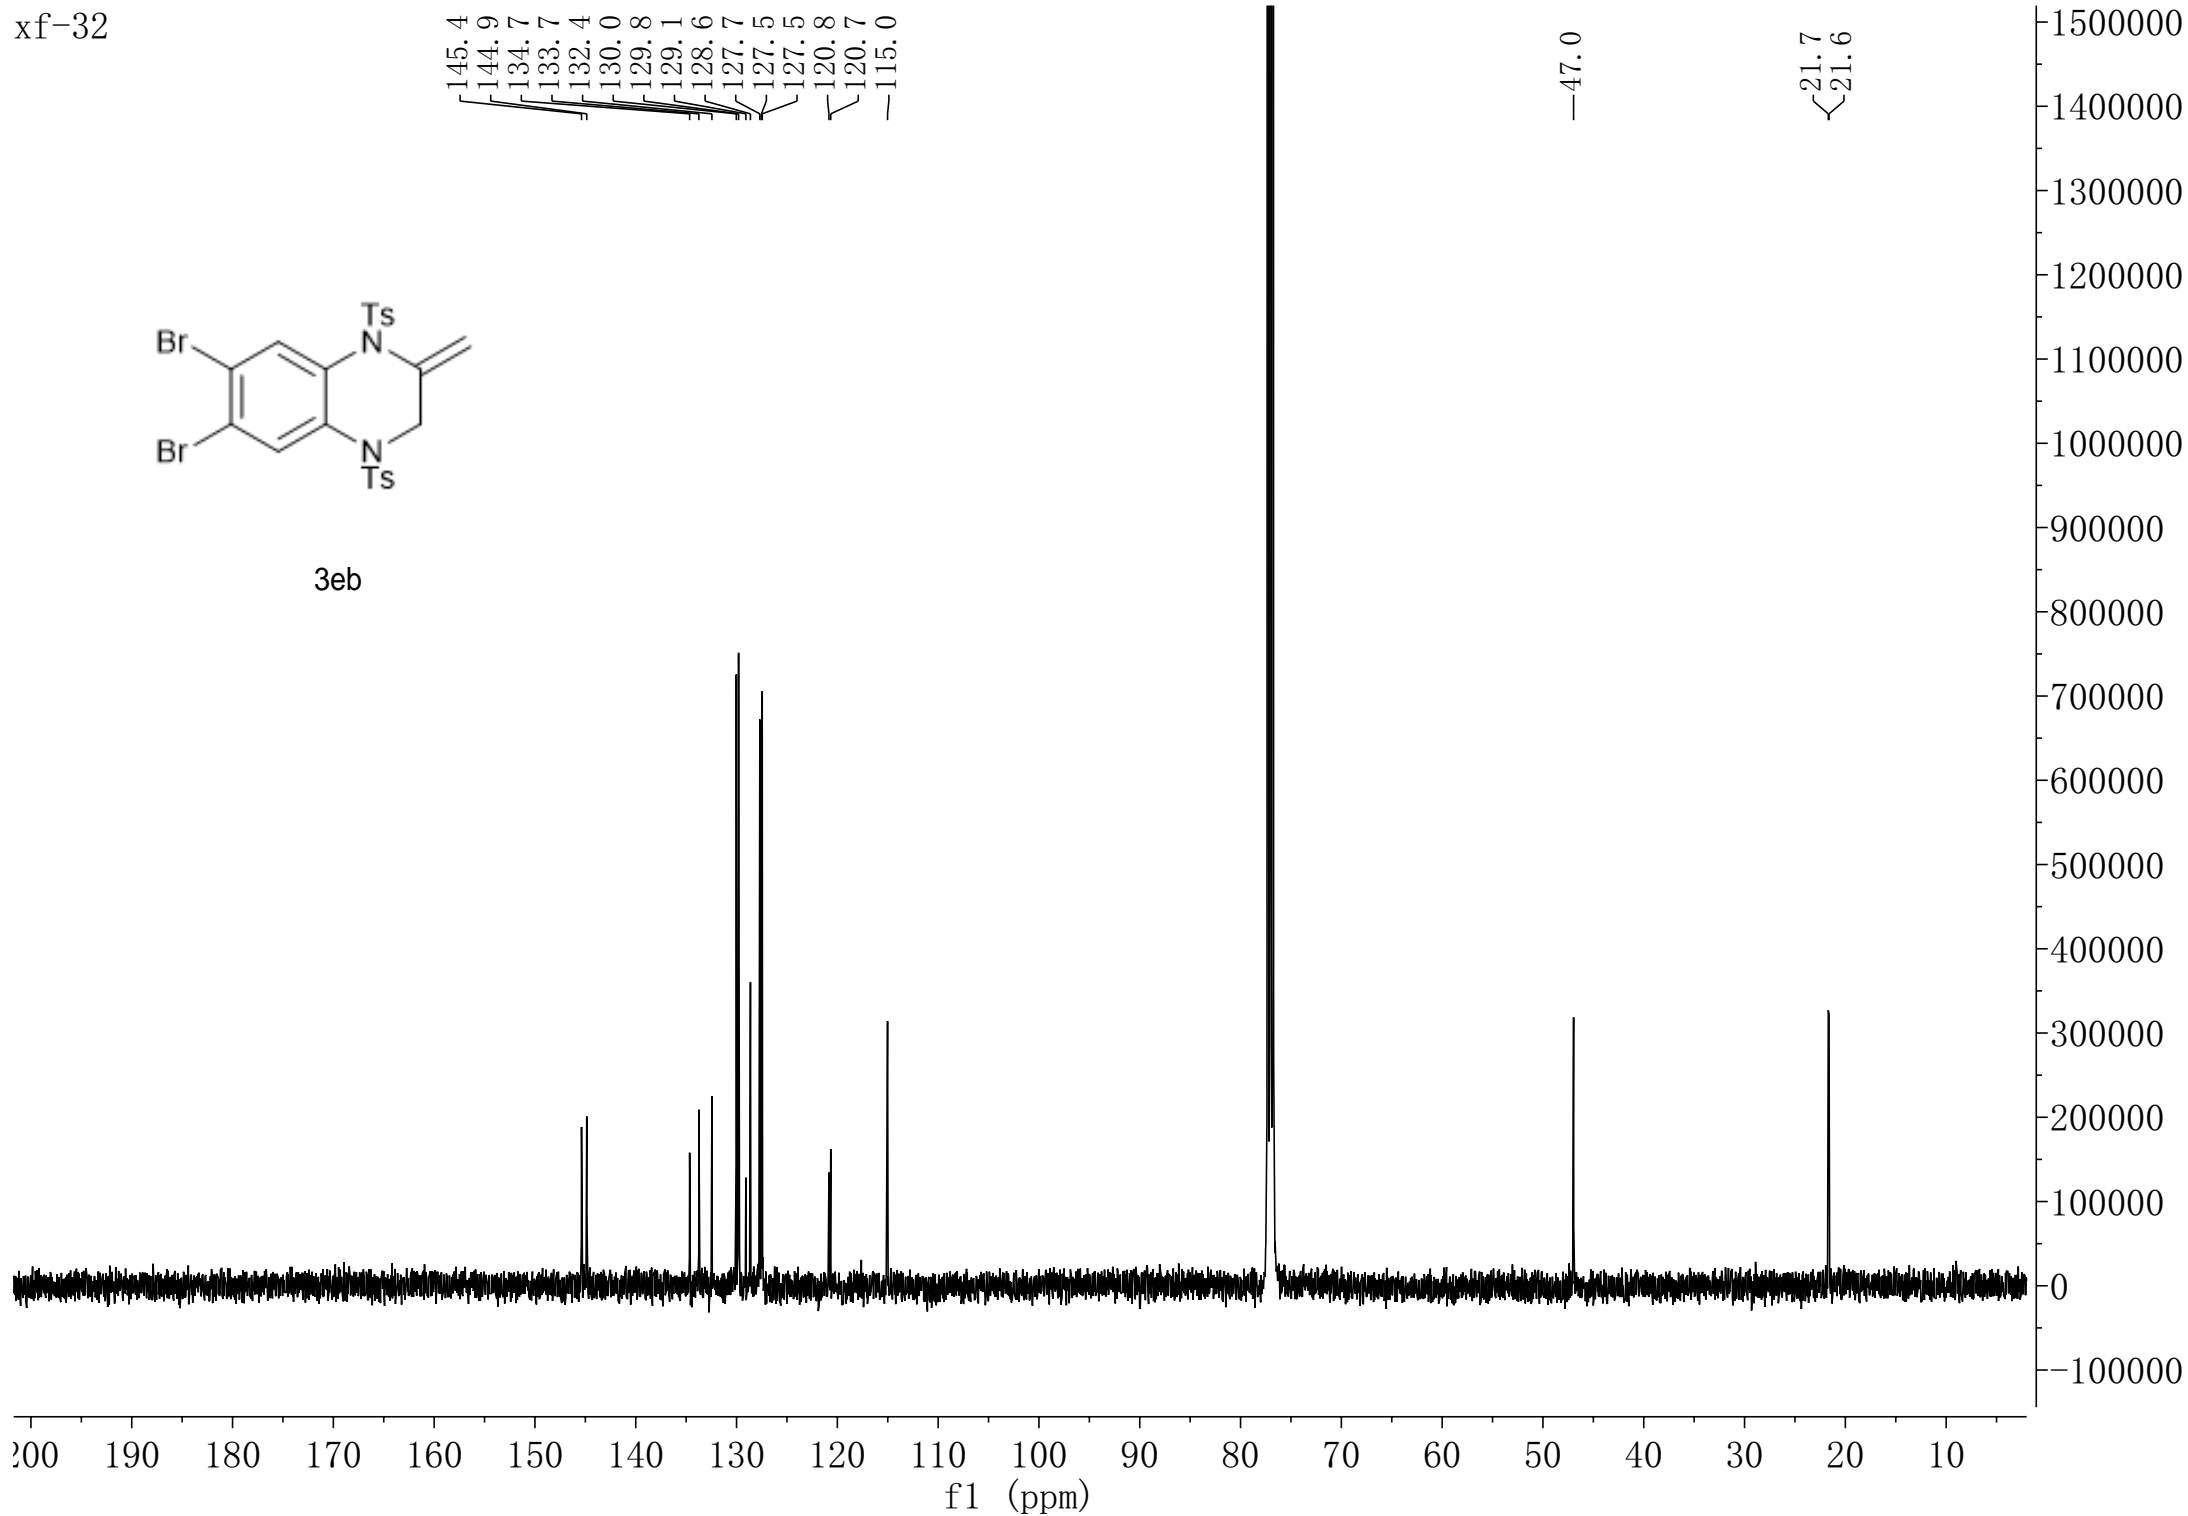



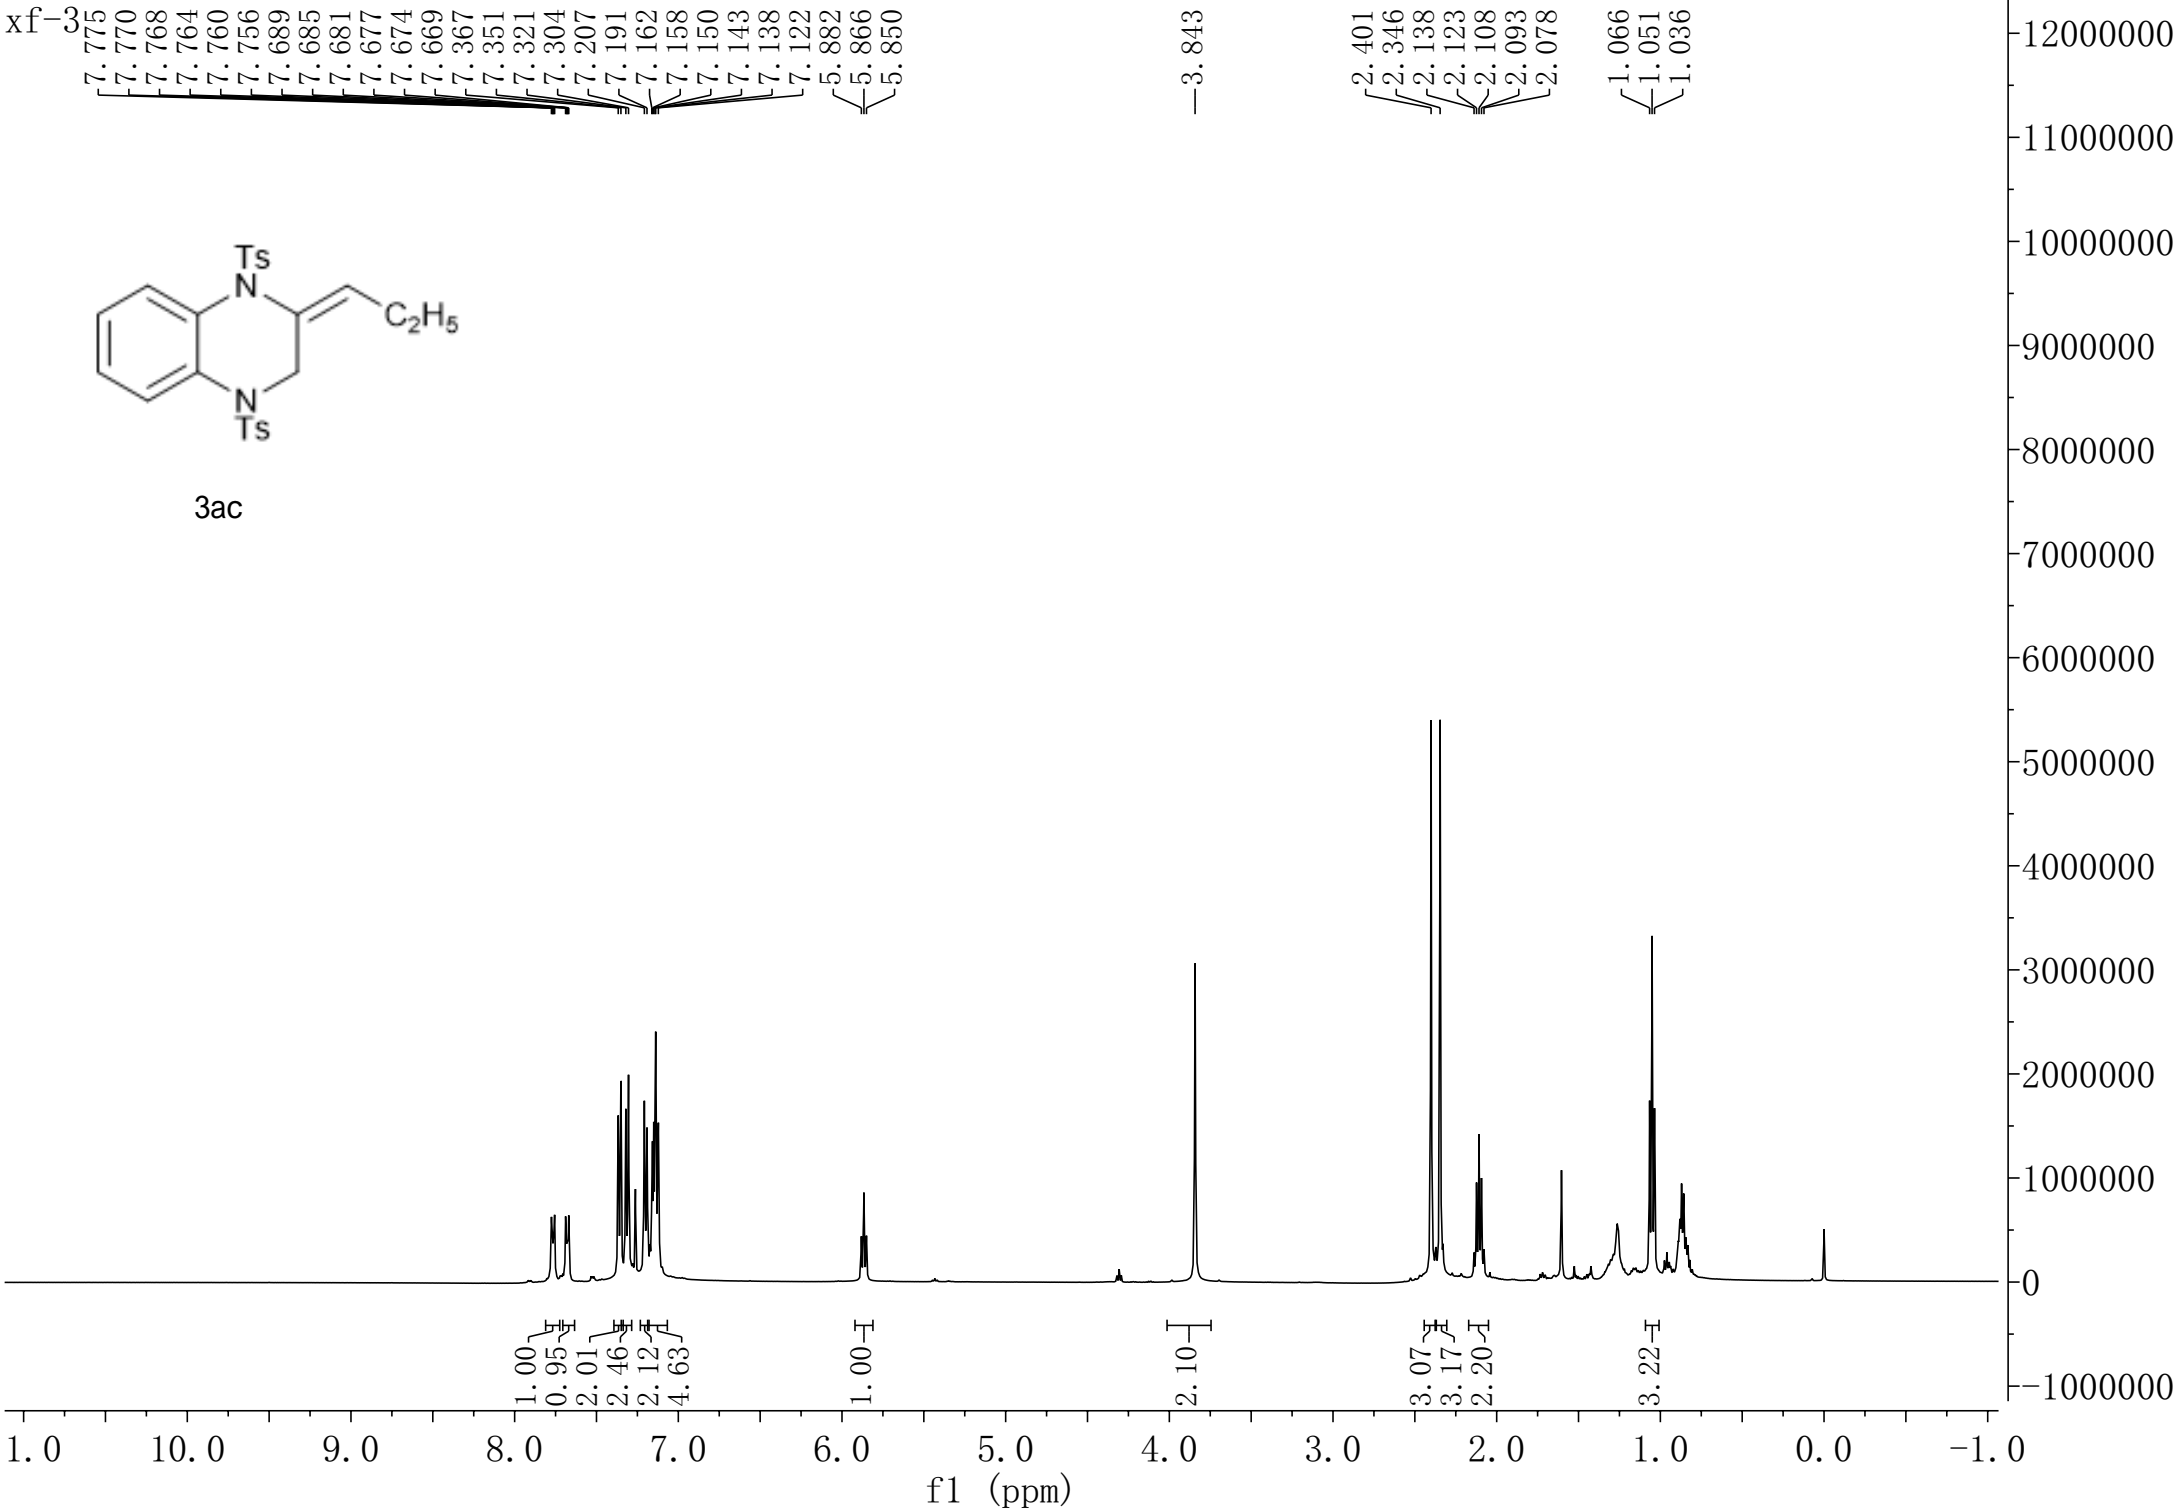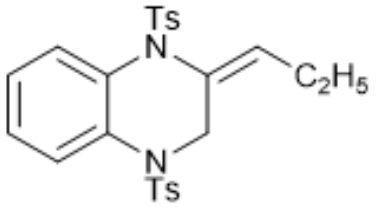

3ac

xf-3

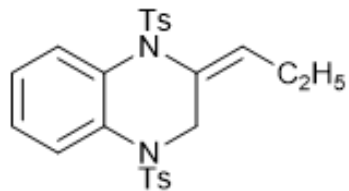

3ac

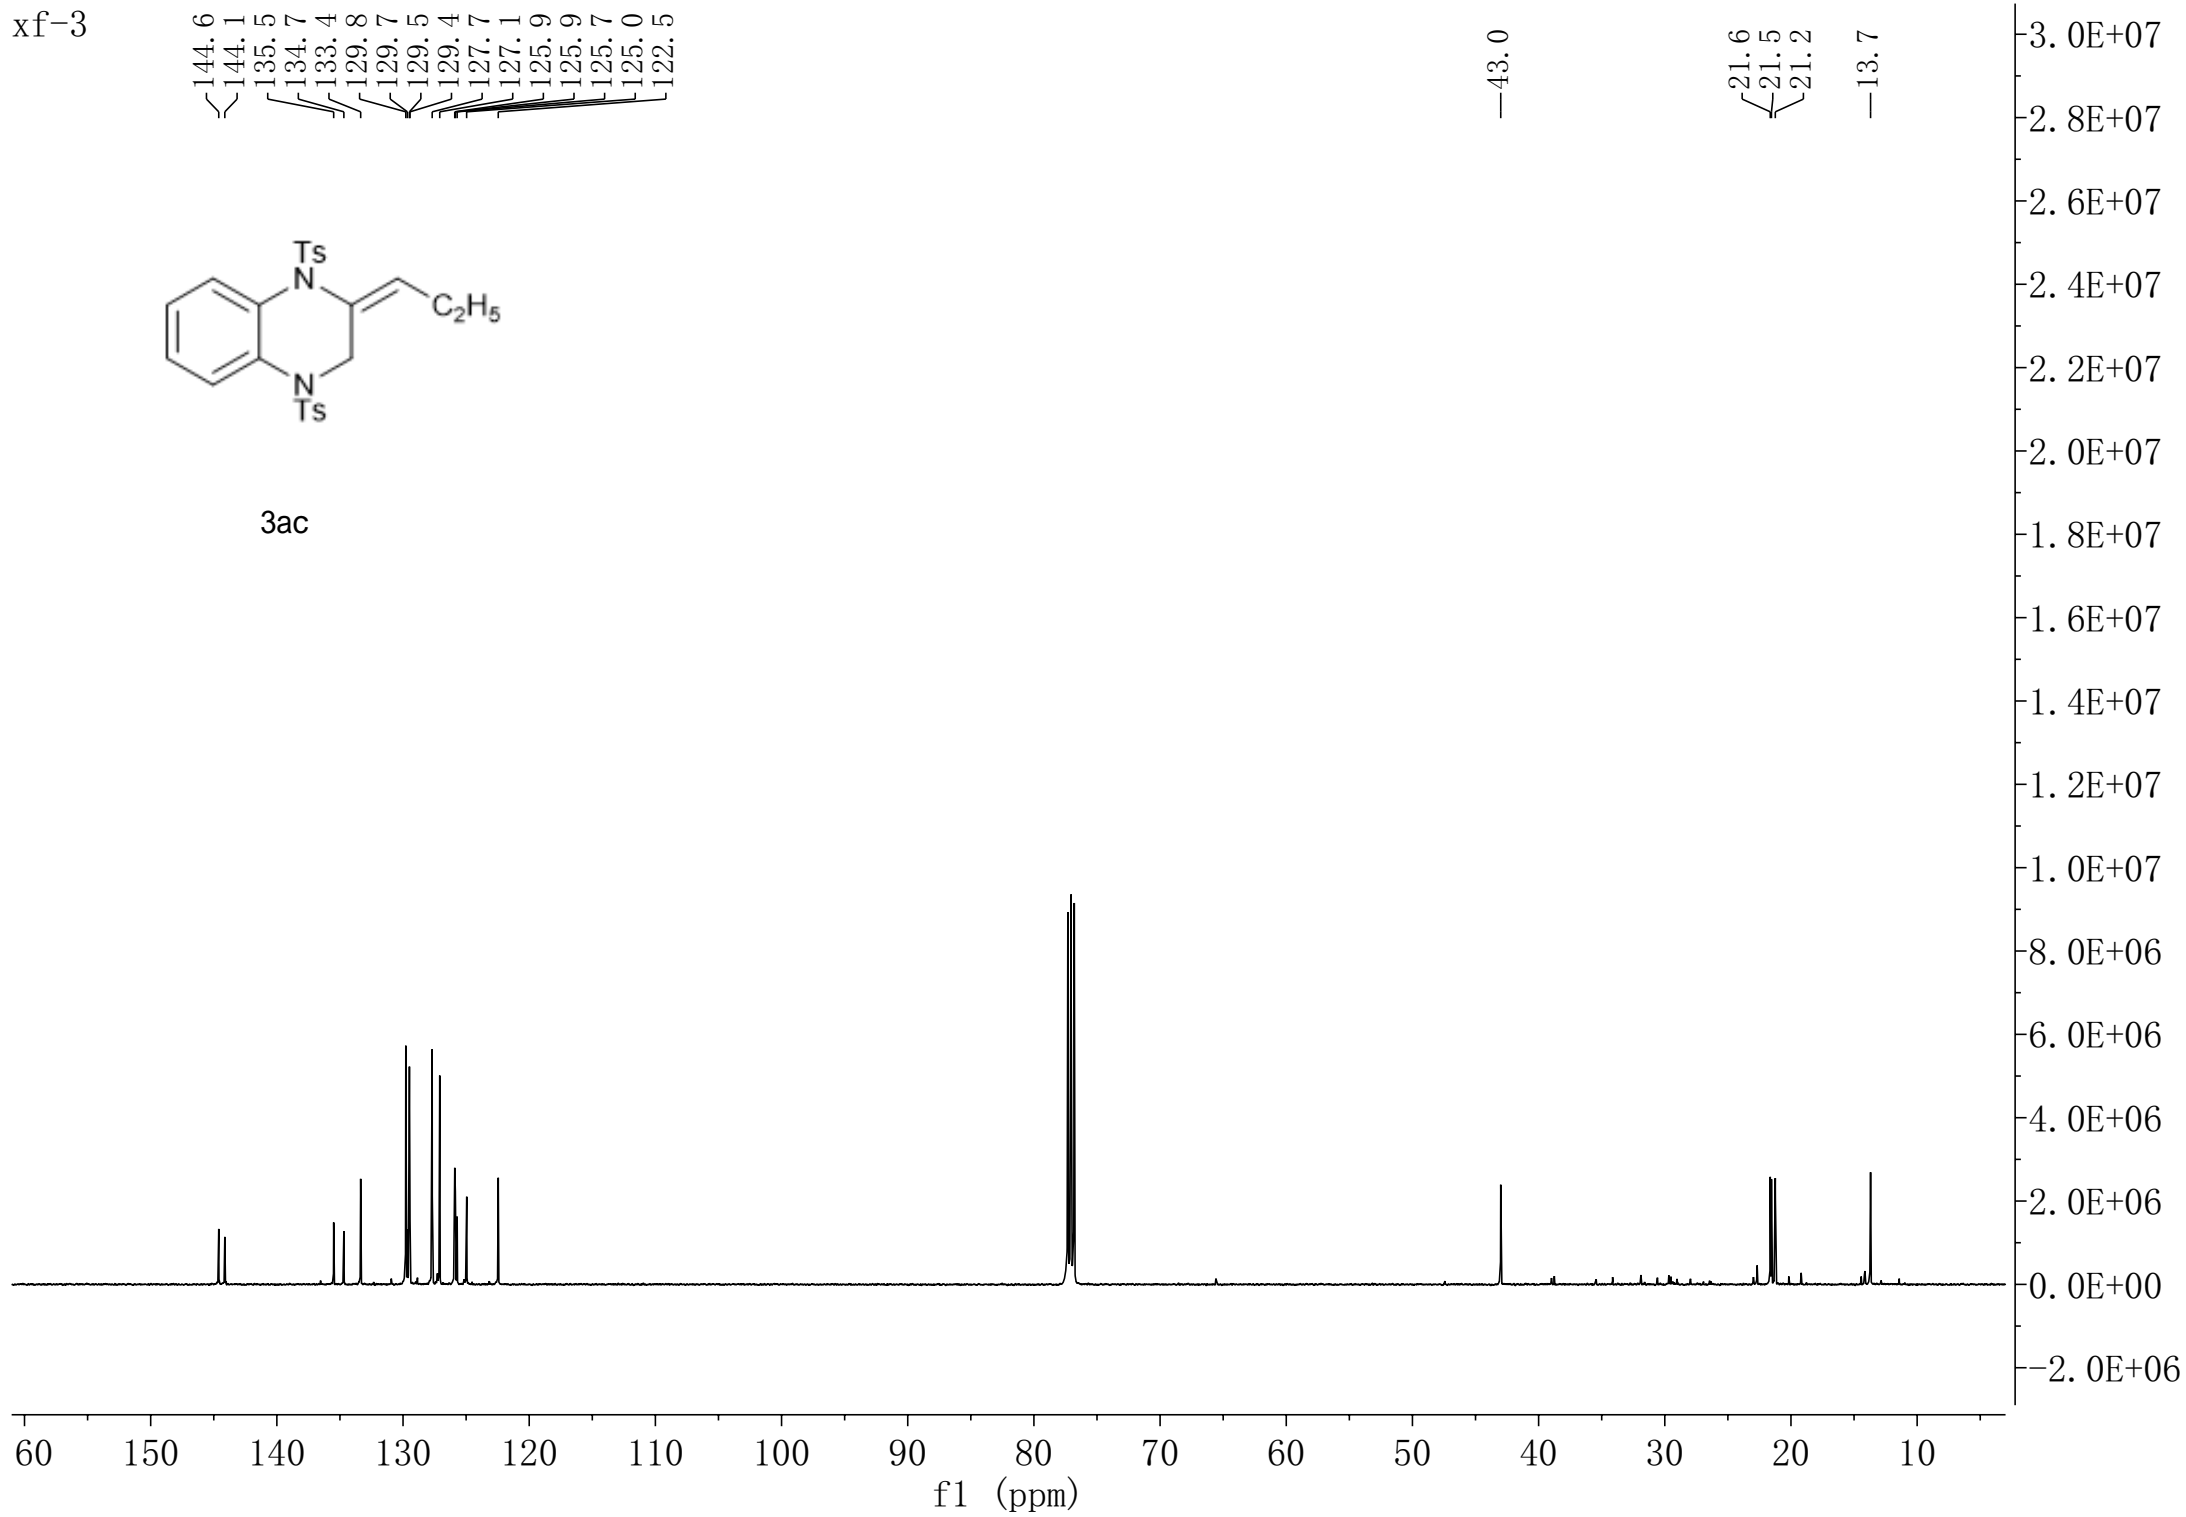

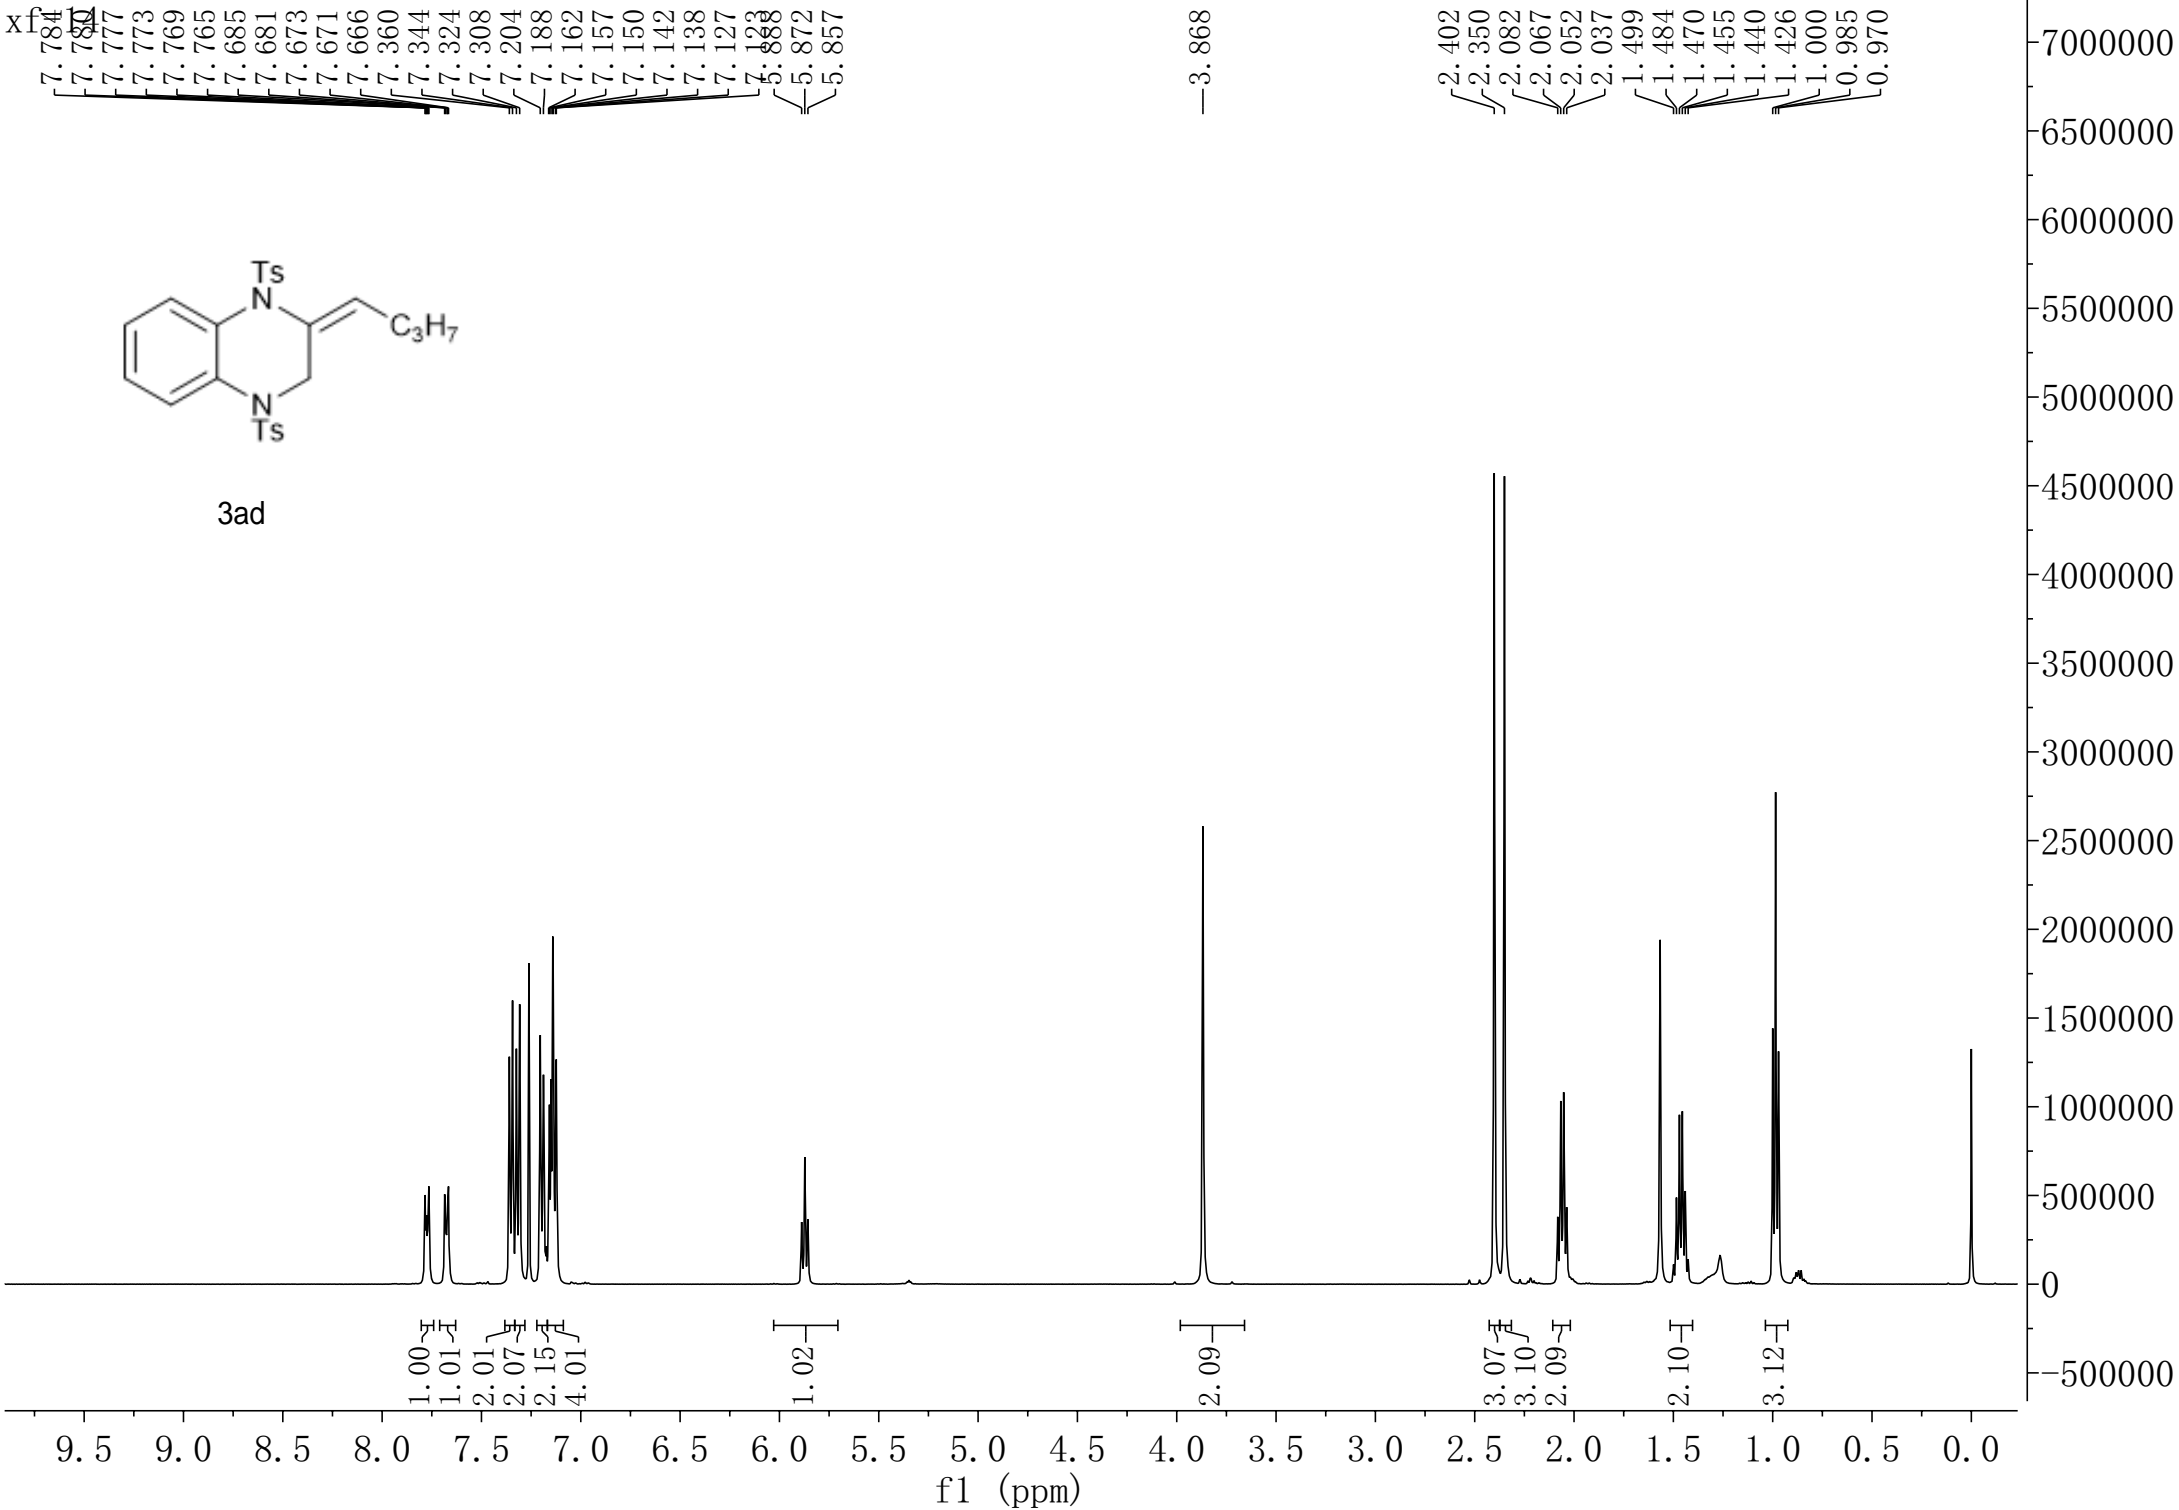

1h. 22. 1. 1r  
XF-14

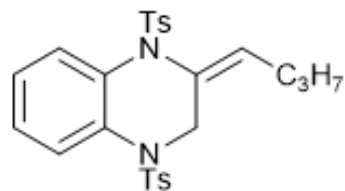

3ad

144.6  
144.1  
135.5  
134.8  
132.0  
129.8  
129.7  
129.5  
127.6  
127.1  
126.2  
125.8  
124.9  
122.4

43.1

29.9

22.5

21.6

21.5

13.8

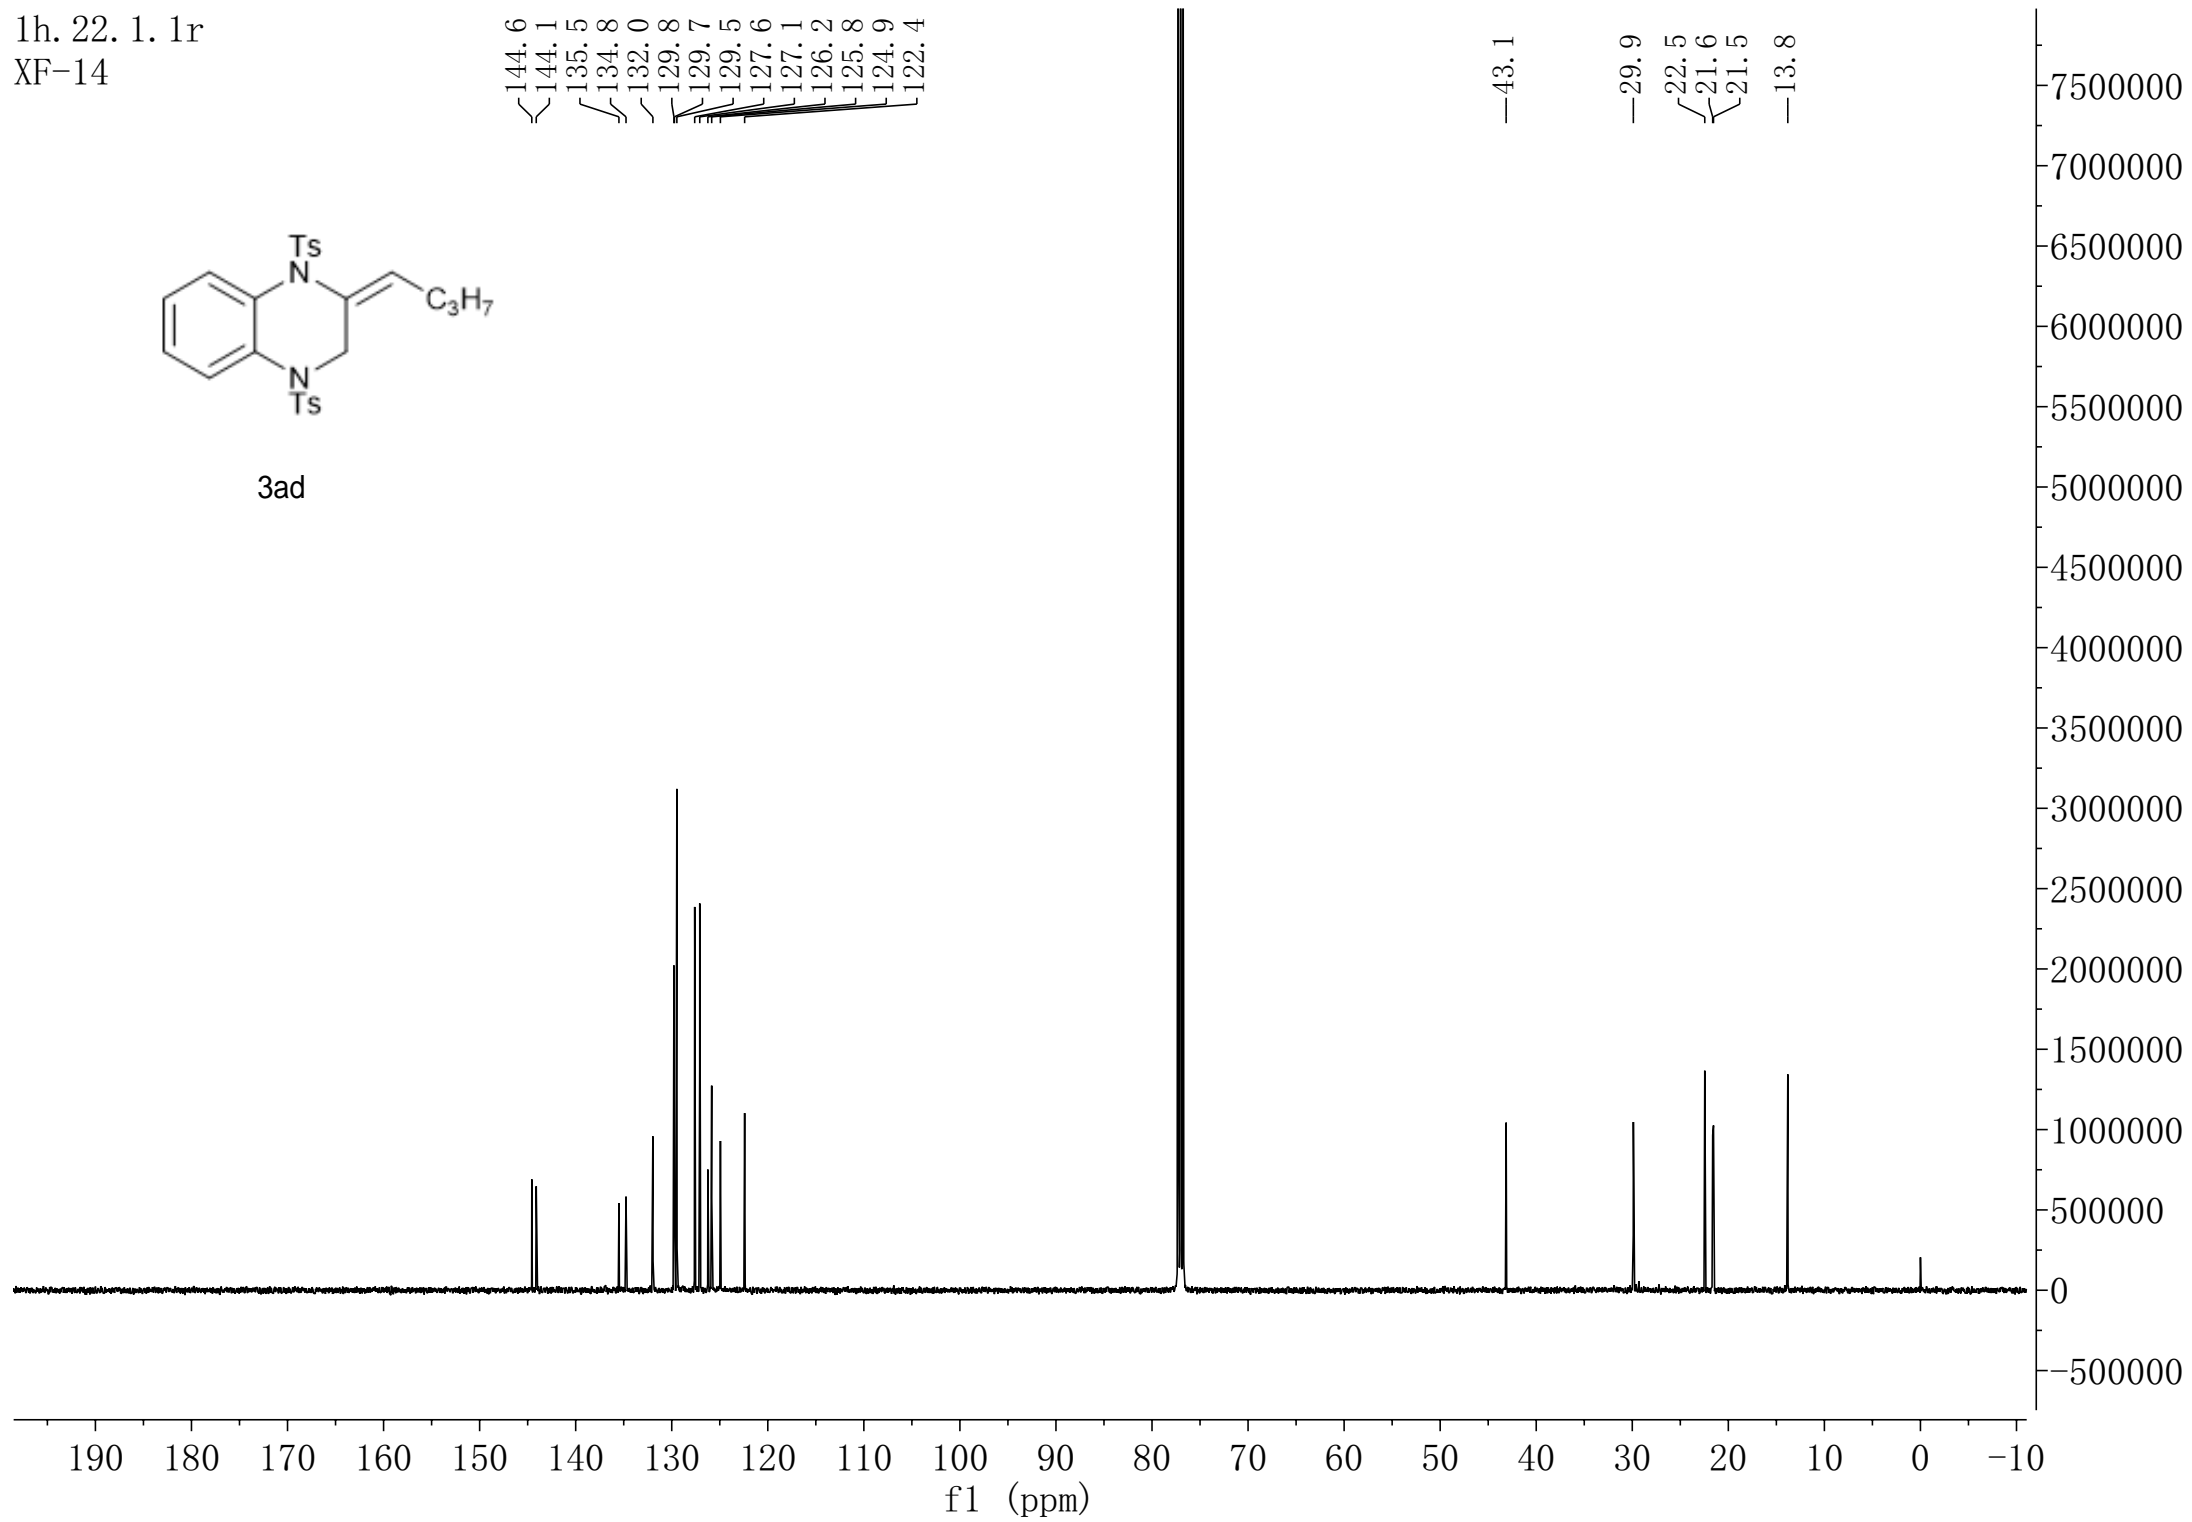

7.765  
 7.778  
 7.775  
 7.771  
 7.767  
 7.763  
 7.688  
 7.684  
 7.680  
 7.676  
 7.674  
 7.669  
 7.360  
 7.343  
 7.322  
 7.306  
 7.203  
 7.187  
 7.161  
 7.157  
 7.150  
 7.142  
 7.137  
 7.126  
 7.121  
 5.883  
 5.868  
 5.852

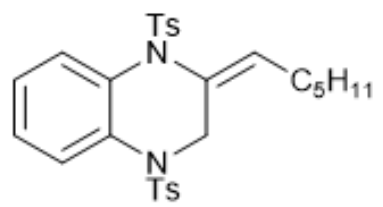

3ae

—3.857

2.402  
 2.349  
 2.090  
 2.075  
 2.060  
 2.045  
 1.436  
 1.422  
 1.407  
 1.365  
 1.357  
 1.349  
 1.342  
 1.334  
 1.326  
 0.951  
 0.938  
 0.924

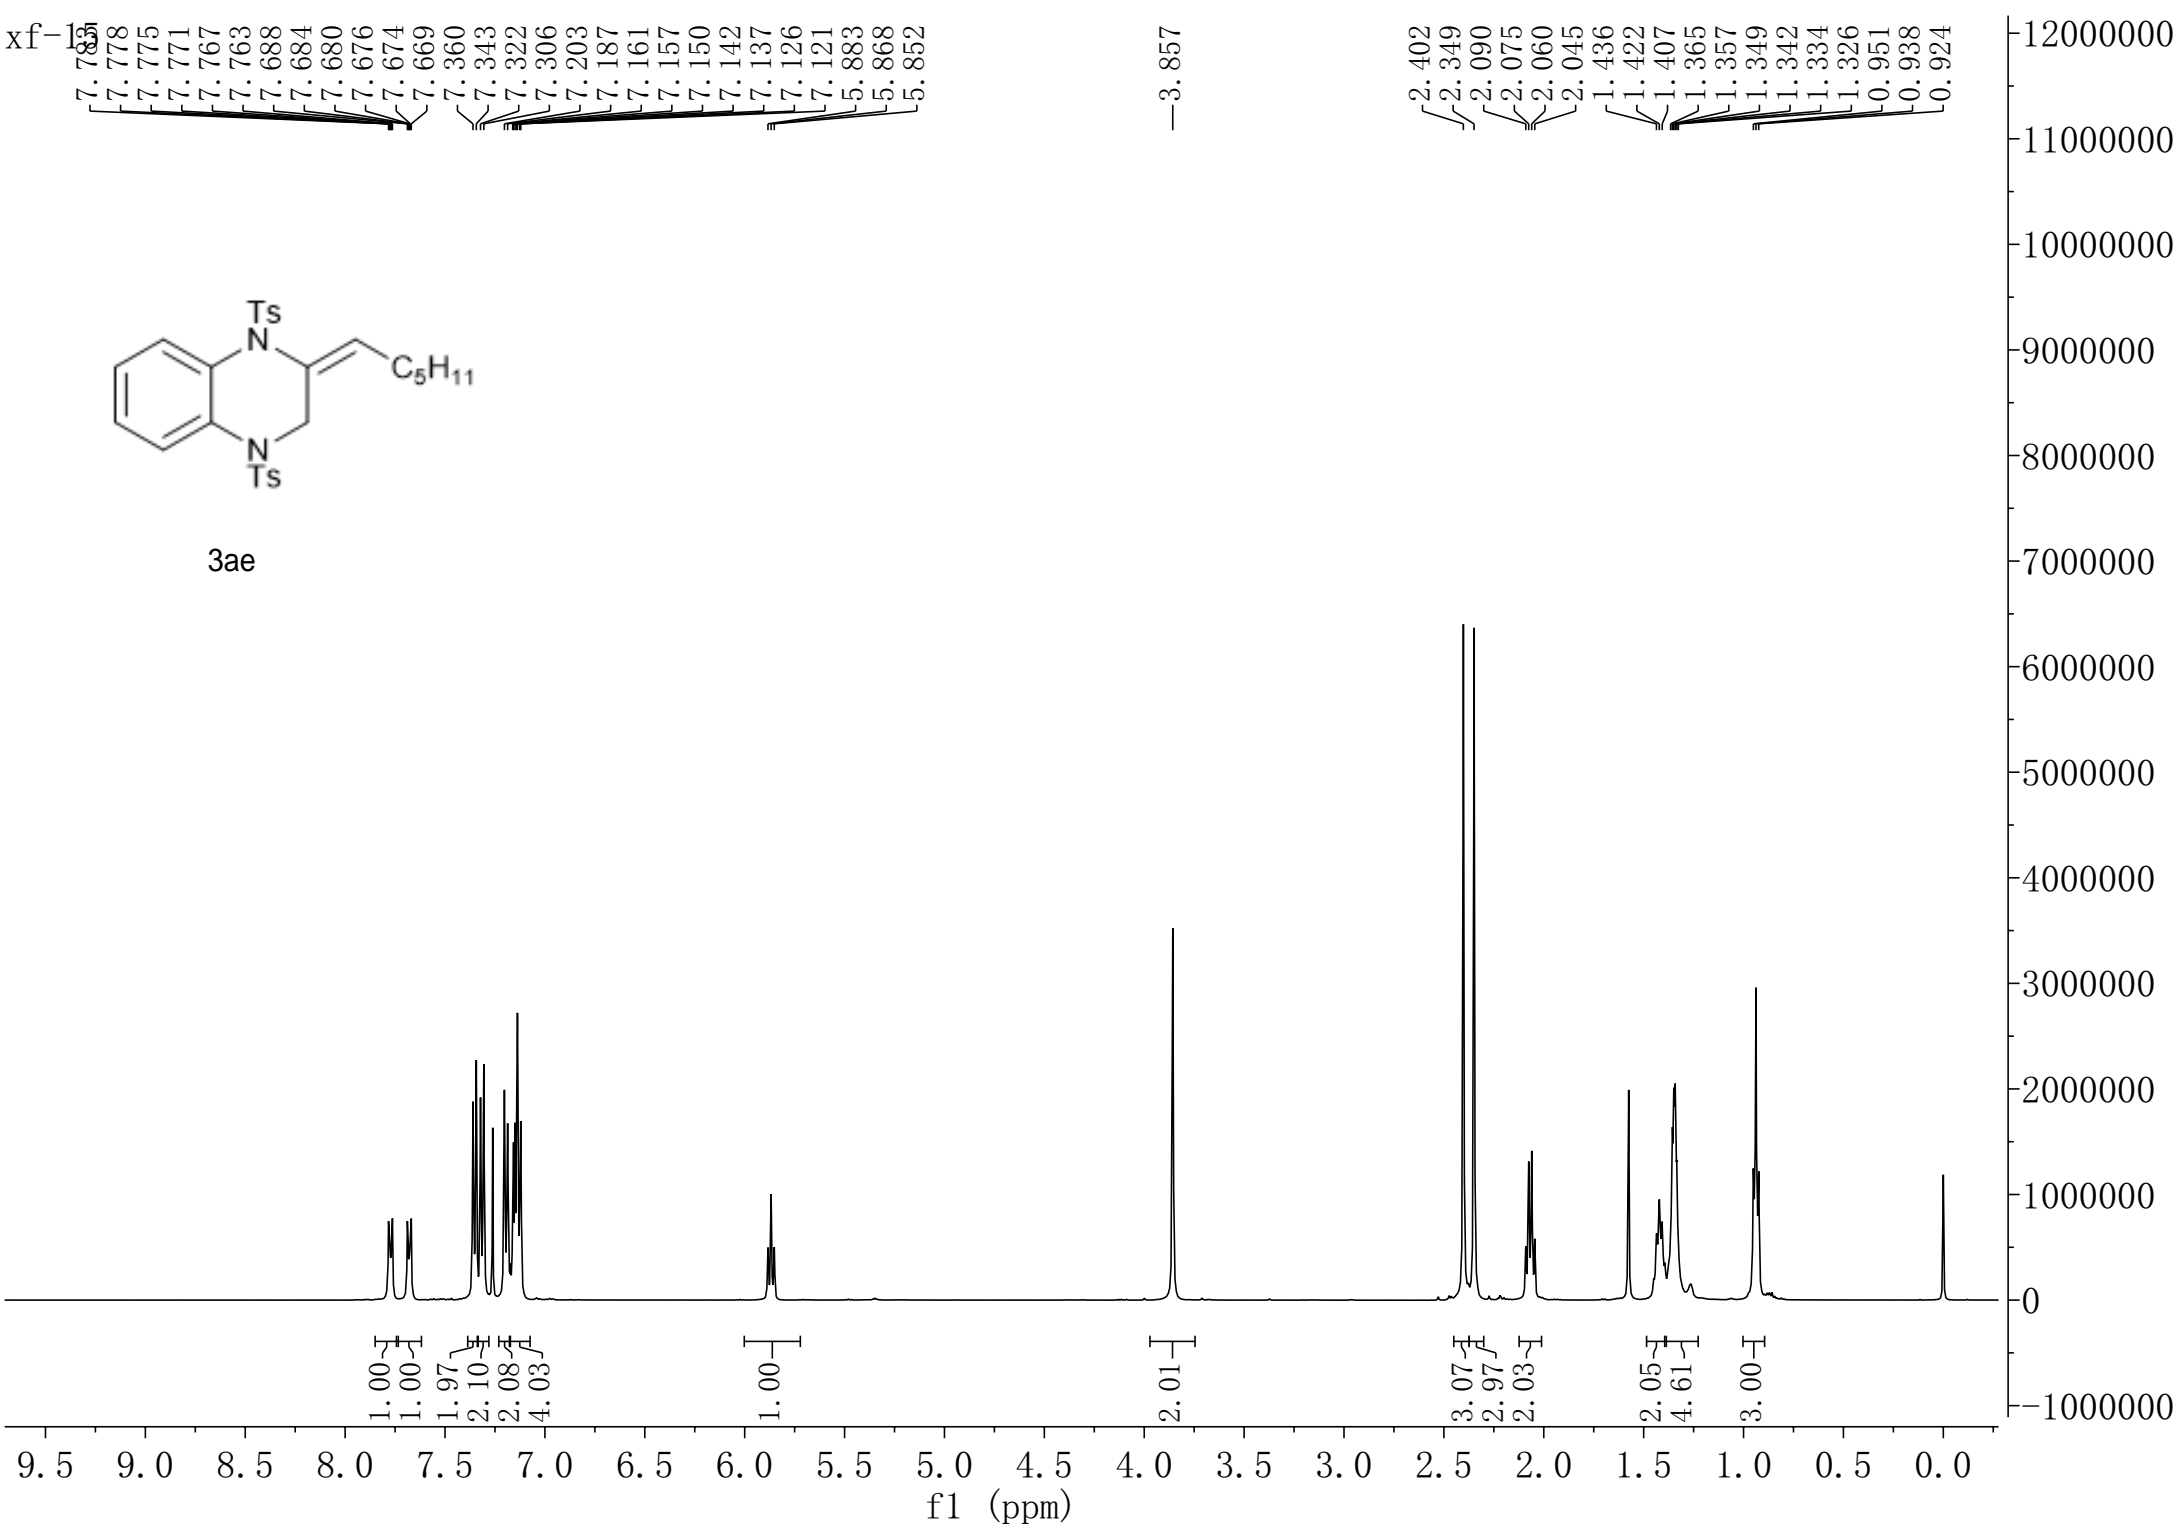

1h. 24. 1. 1r  
XF-15

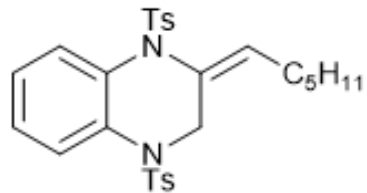

3ae

144.6  
144.1  
135.5  
134.8  
132.2  
129.8  
129.7  
129.5  
127.6  
127.1  
126.0  
125.9  
124.9  
122.4

43.1  
31.4  
28.8  
27.8  
22.5  
21.6  
21.5  
14.1

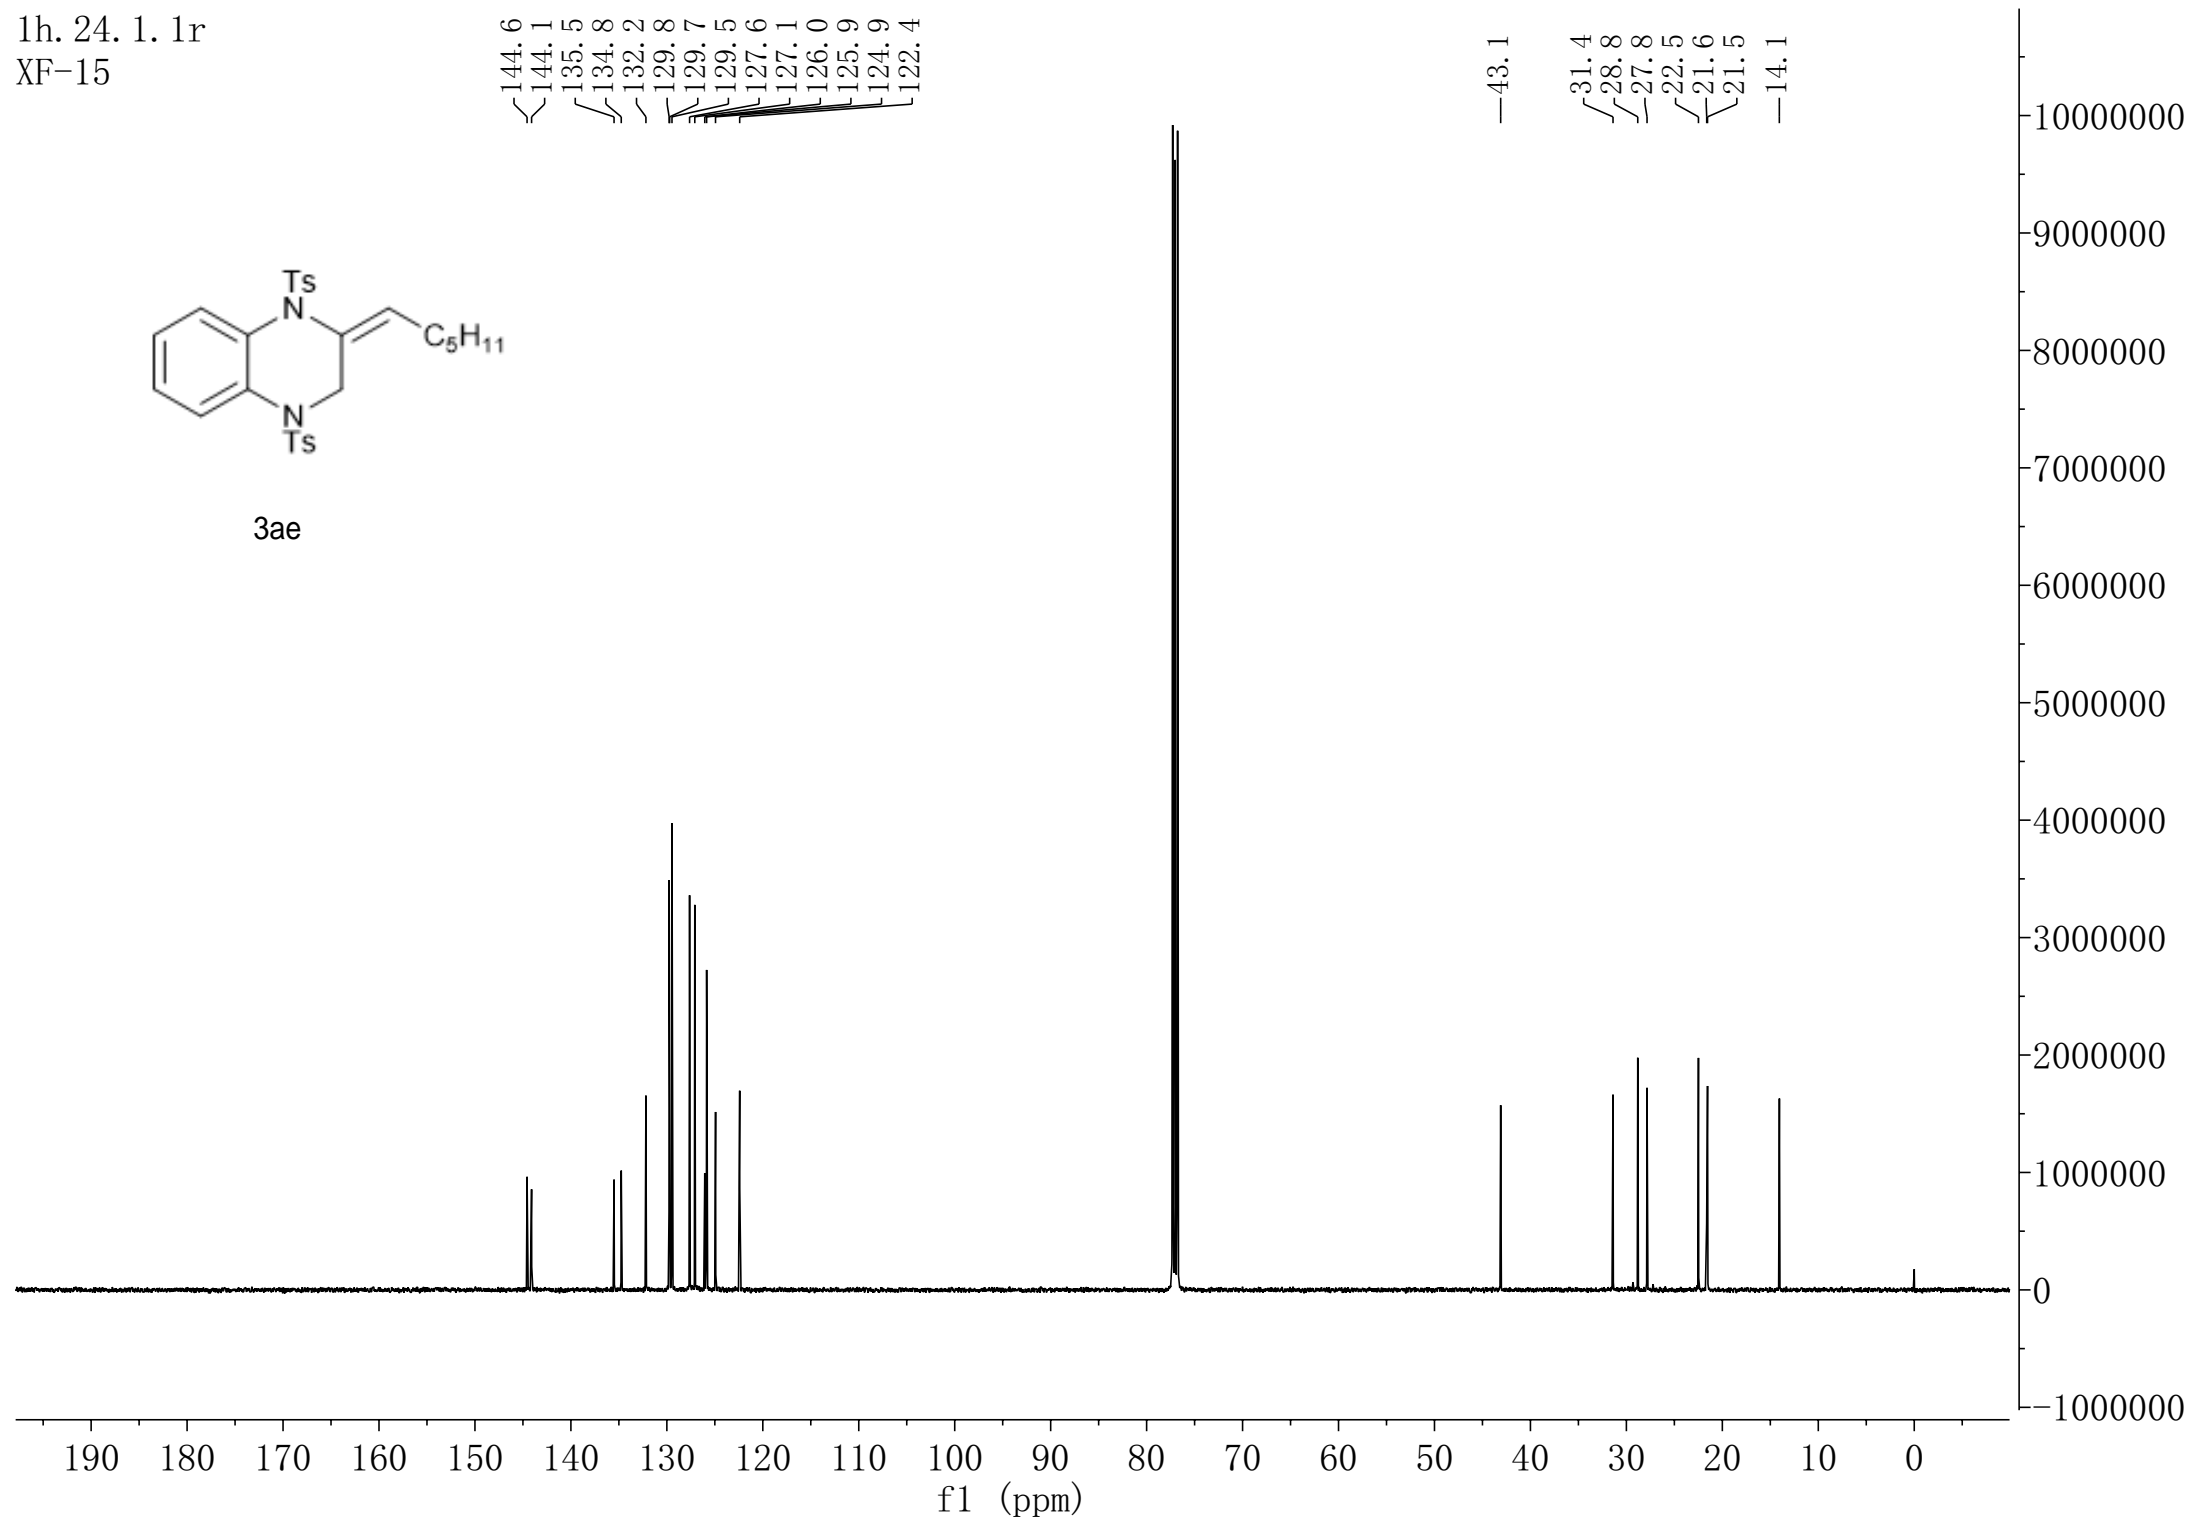

xf-10

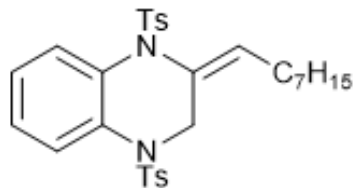

3af

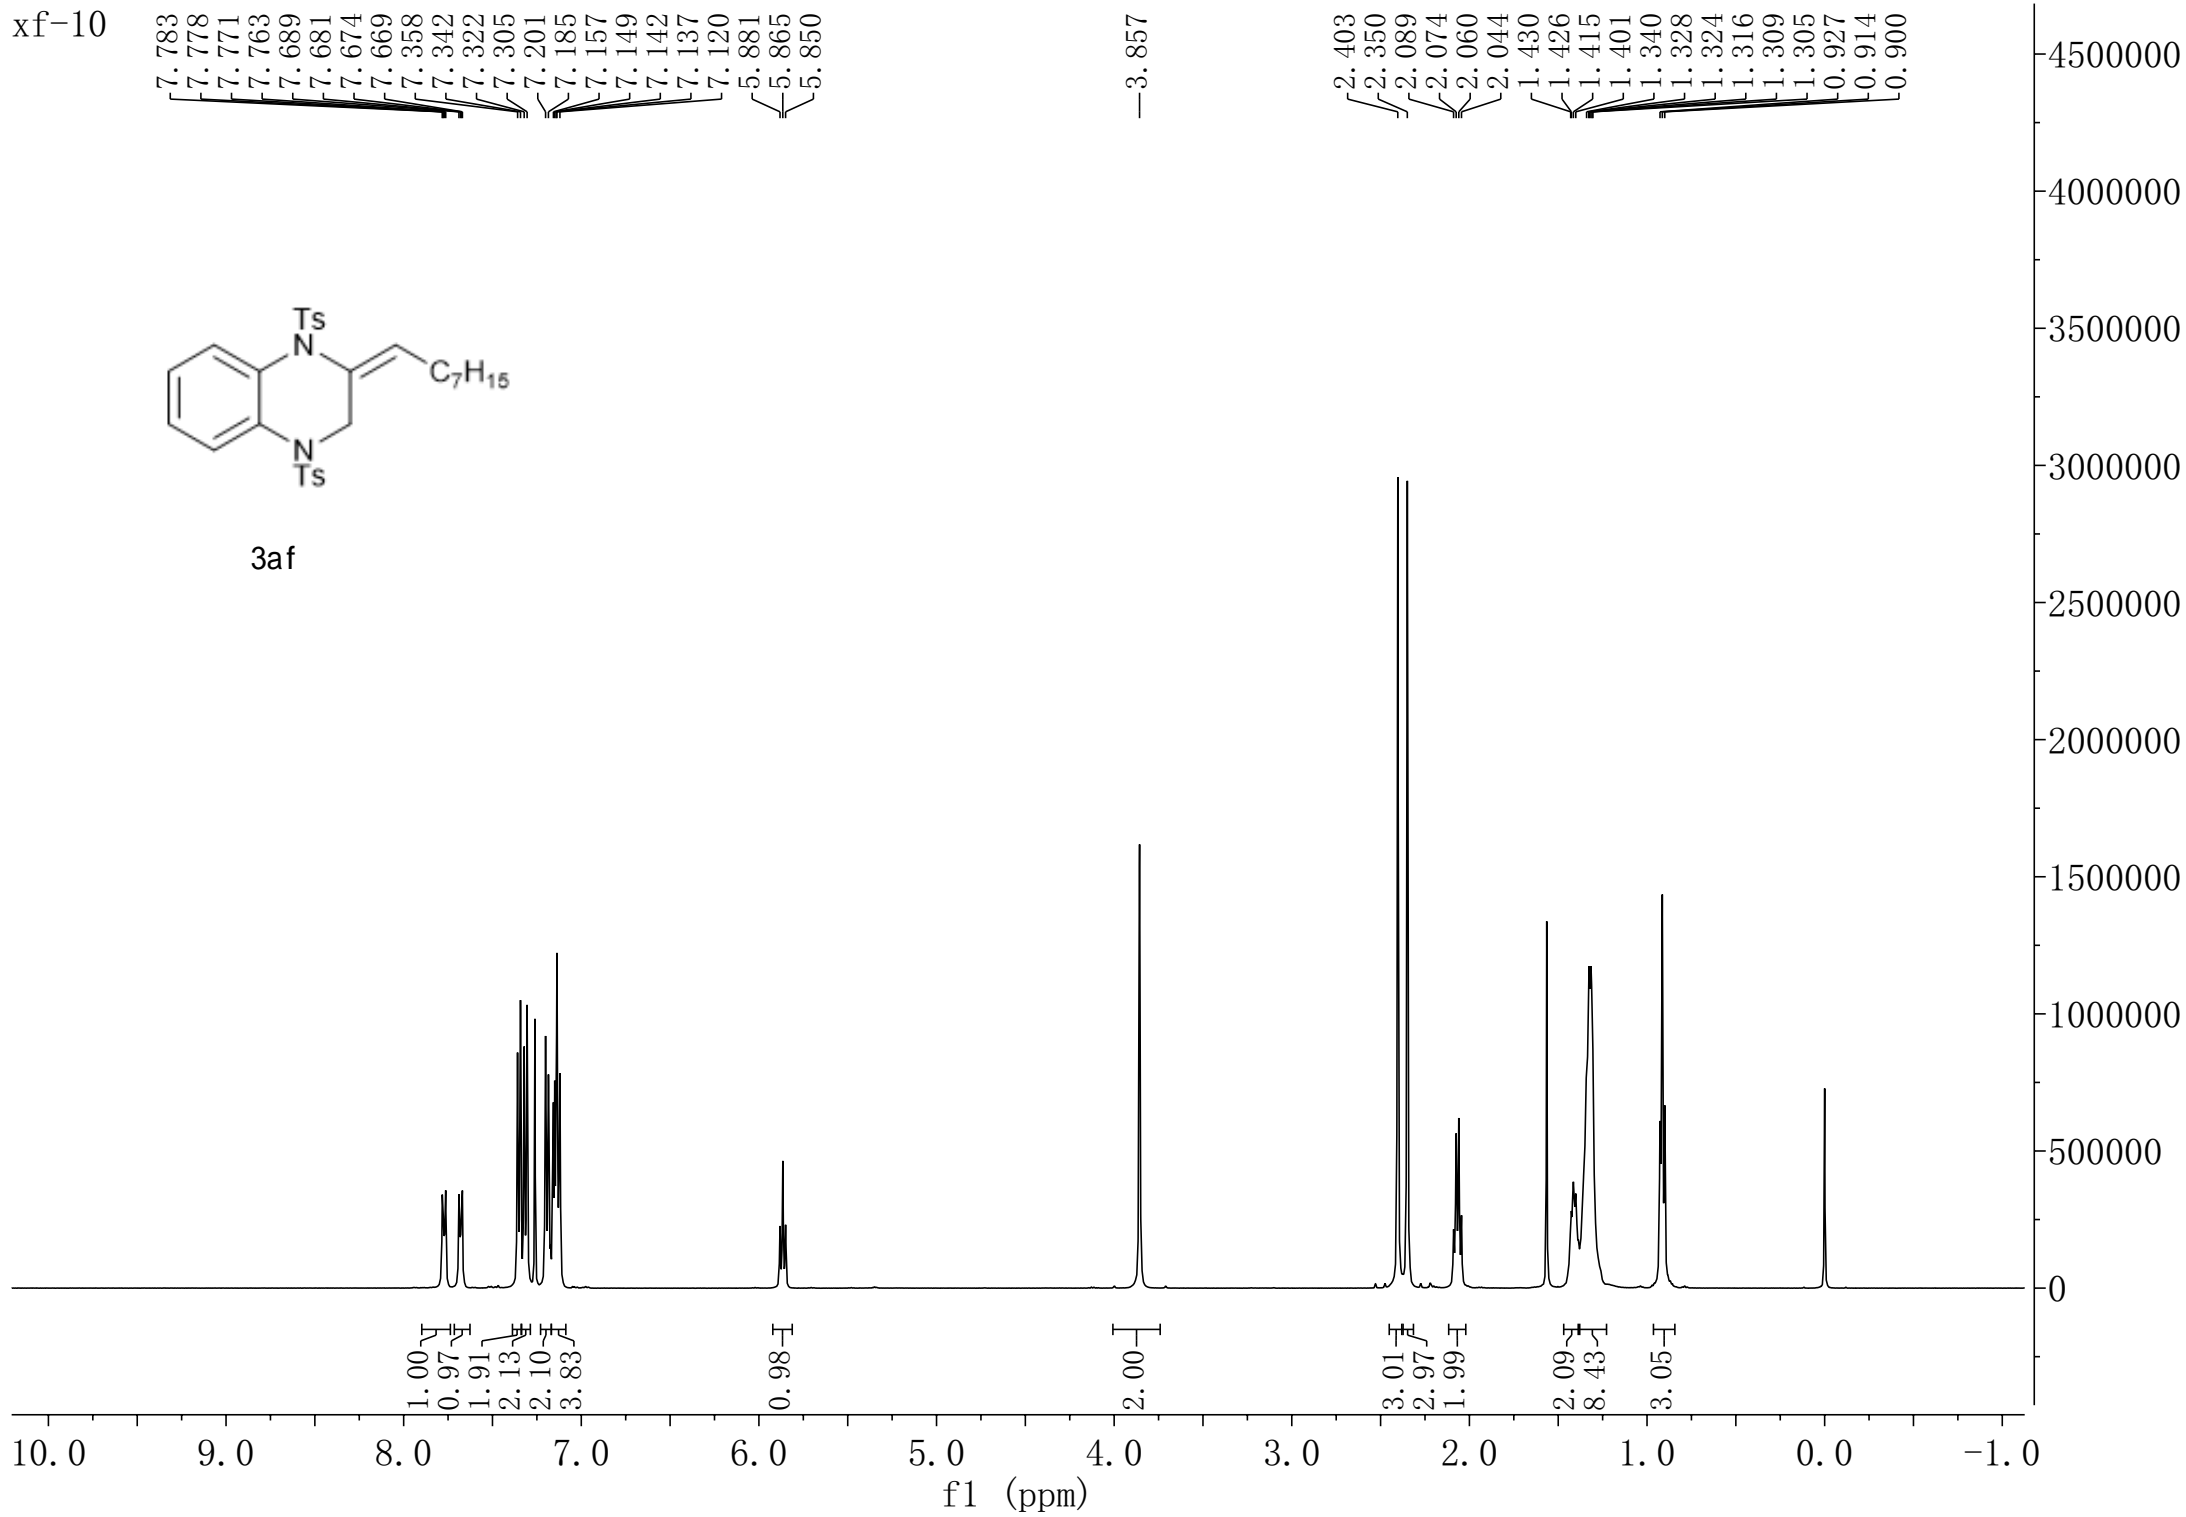

xf-10

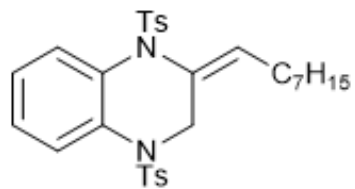

3af

144.6  
144.1  
135.5  
134.8  
132.2  
129.8  
129.7  
129.5  
127.6  
127.1  
126.0  
125.9  
124.9  
122.4

43.1  
31.8  
29.2  
29.2  
29.1  
27.9  
22.7  
21.6  
21.5  
-14.1

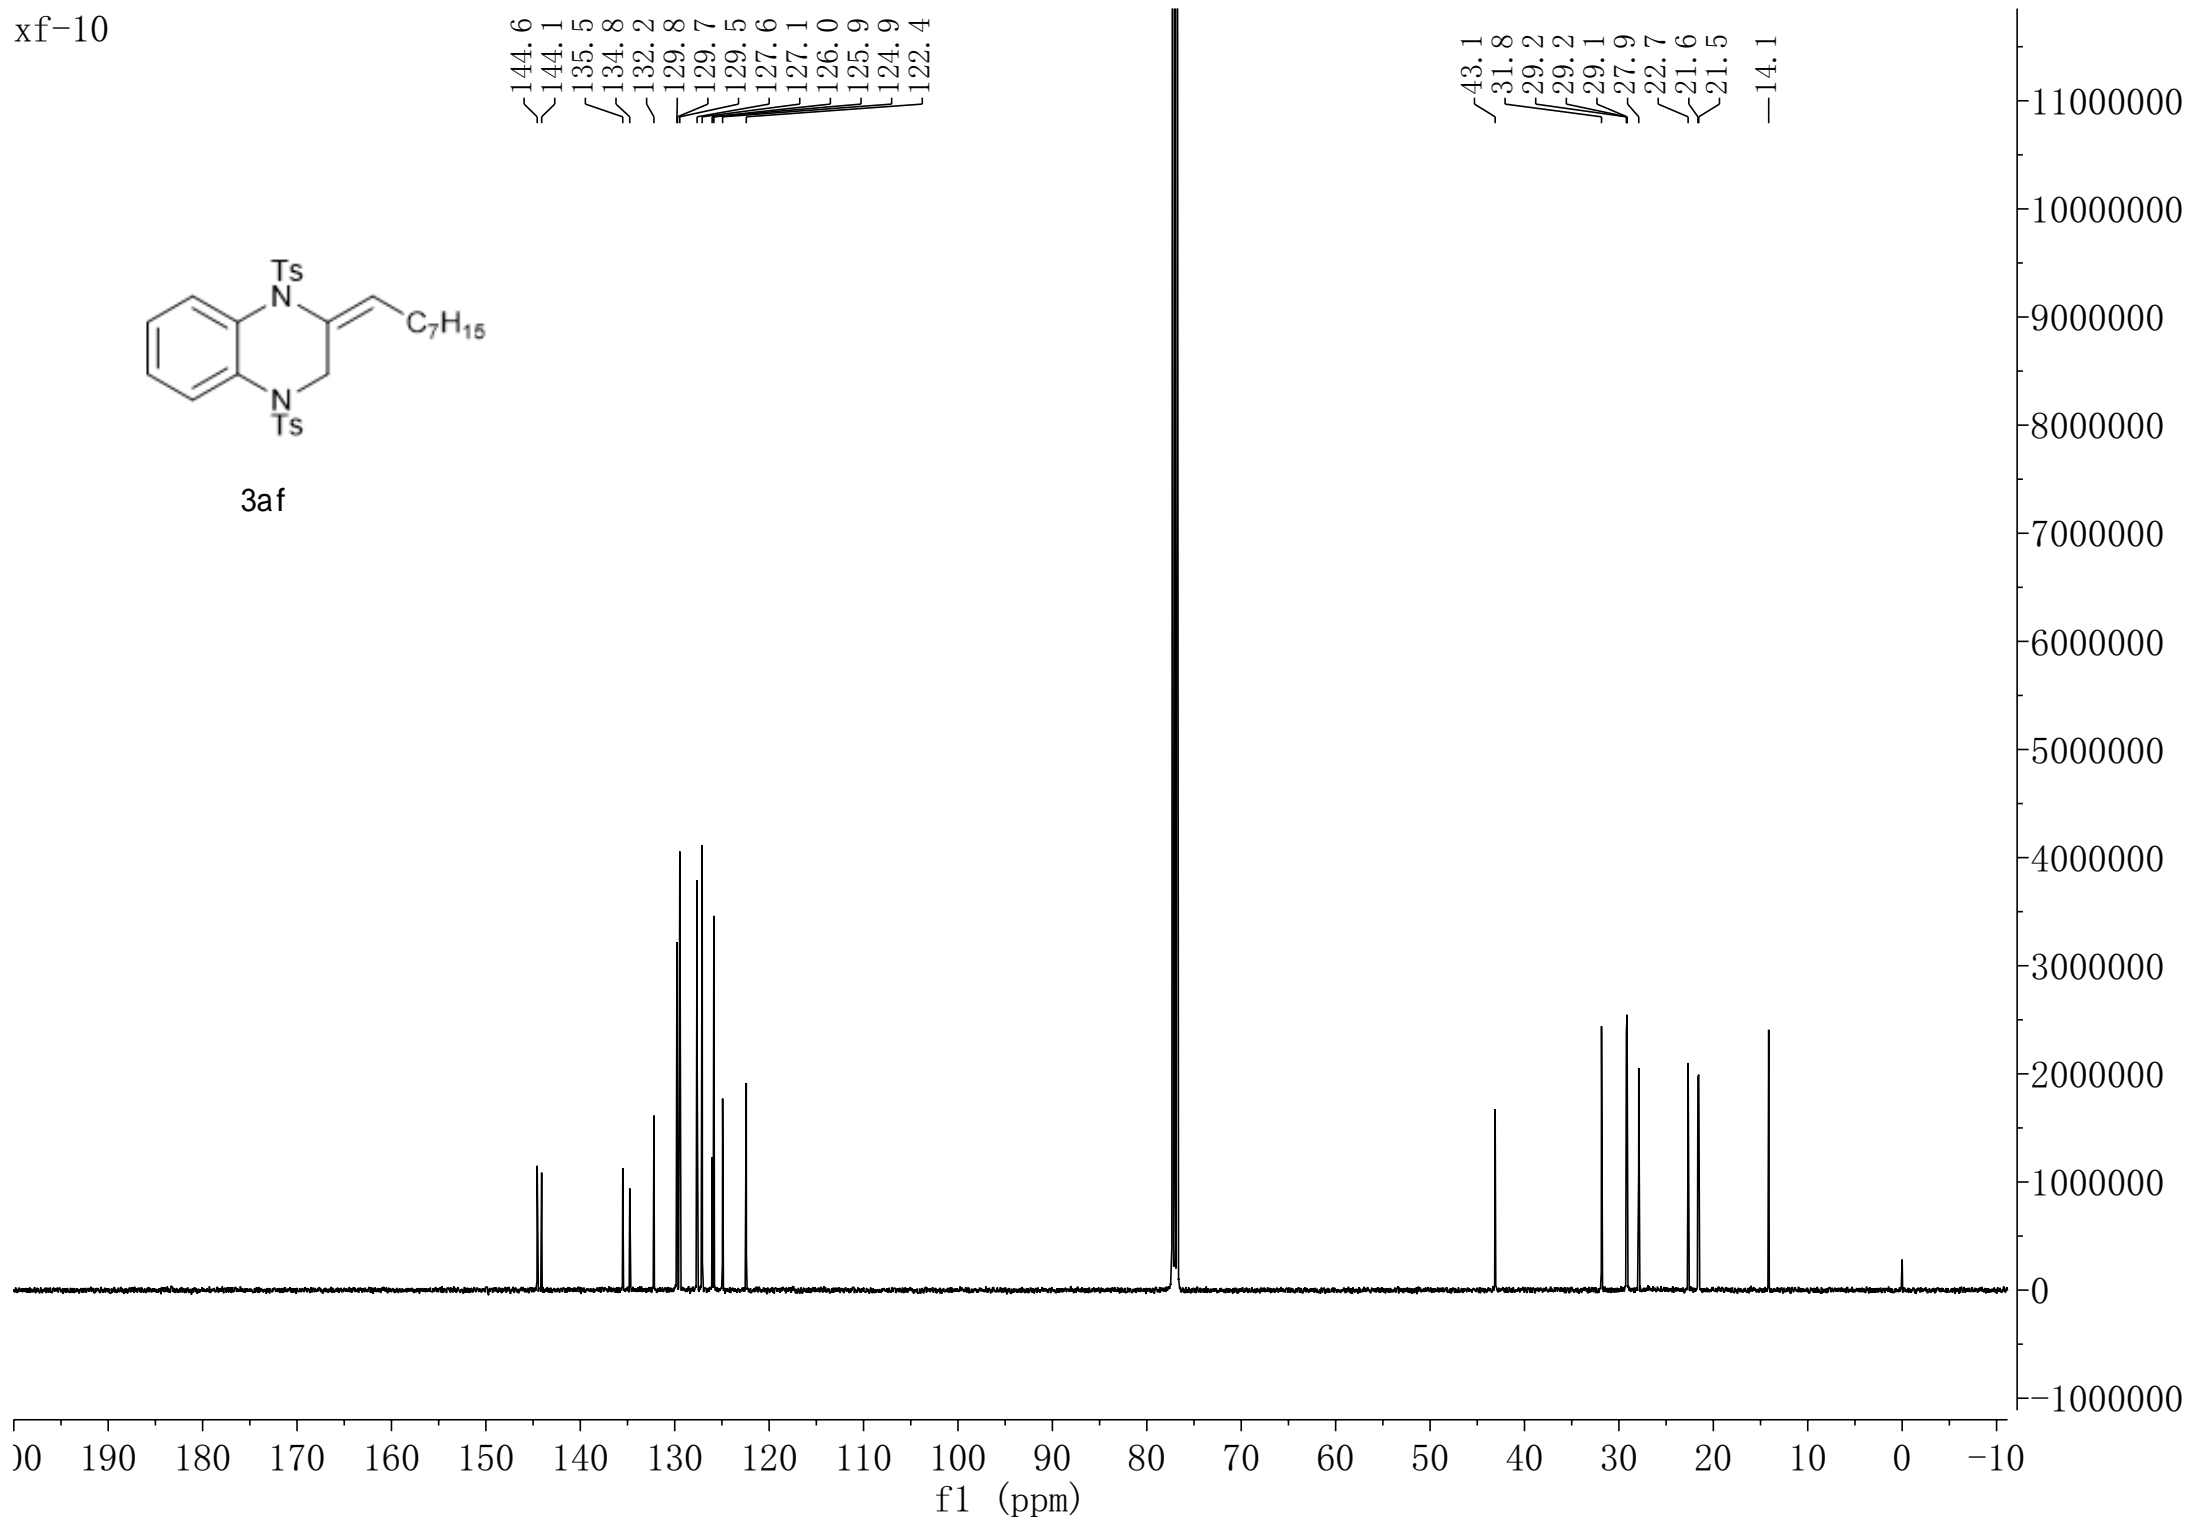



xf-4

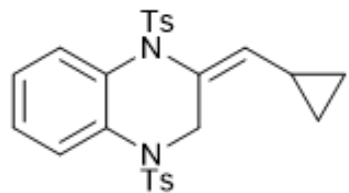

3ag

7.811  
7.805  
7.801  
7.796  
7.791  
7.785  
7.780  
7.775  
7.770  
7.349  
7.333  
7.306  
7.293  
7.289  
7.263  
7.202  
7.186  
7.171  
7.167  
7.160  
7.153  
7.151  
7.149  
7.090  
7.074  
5.184  
5.163

—3.841

2.395  
2.330  
1.539  
1.533  
1.530  
1.527  
1.524  
1.518  
1.509  
0.960  
0.955  
0.944  
0.939  
0.522  
0.518  
0.513  
0.509

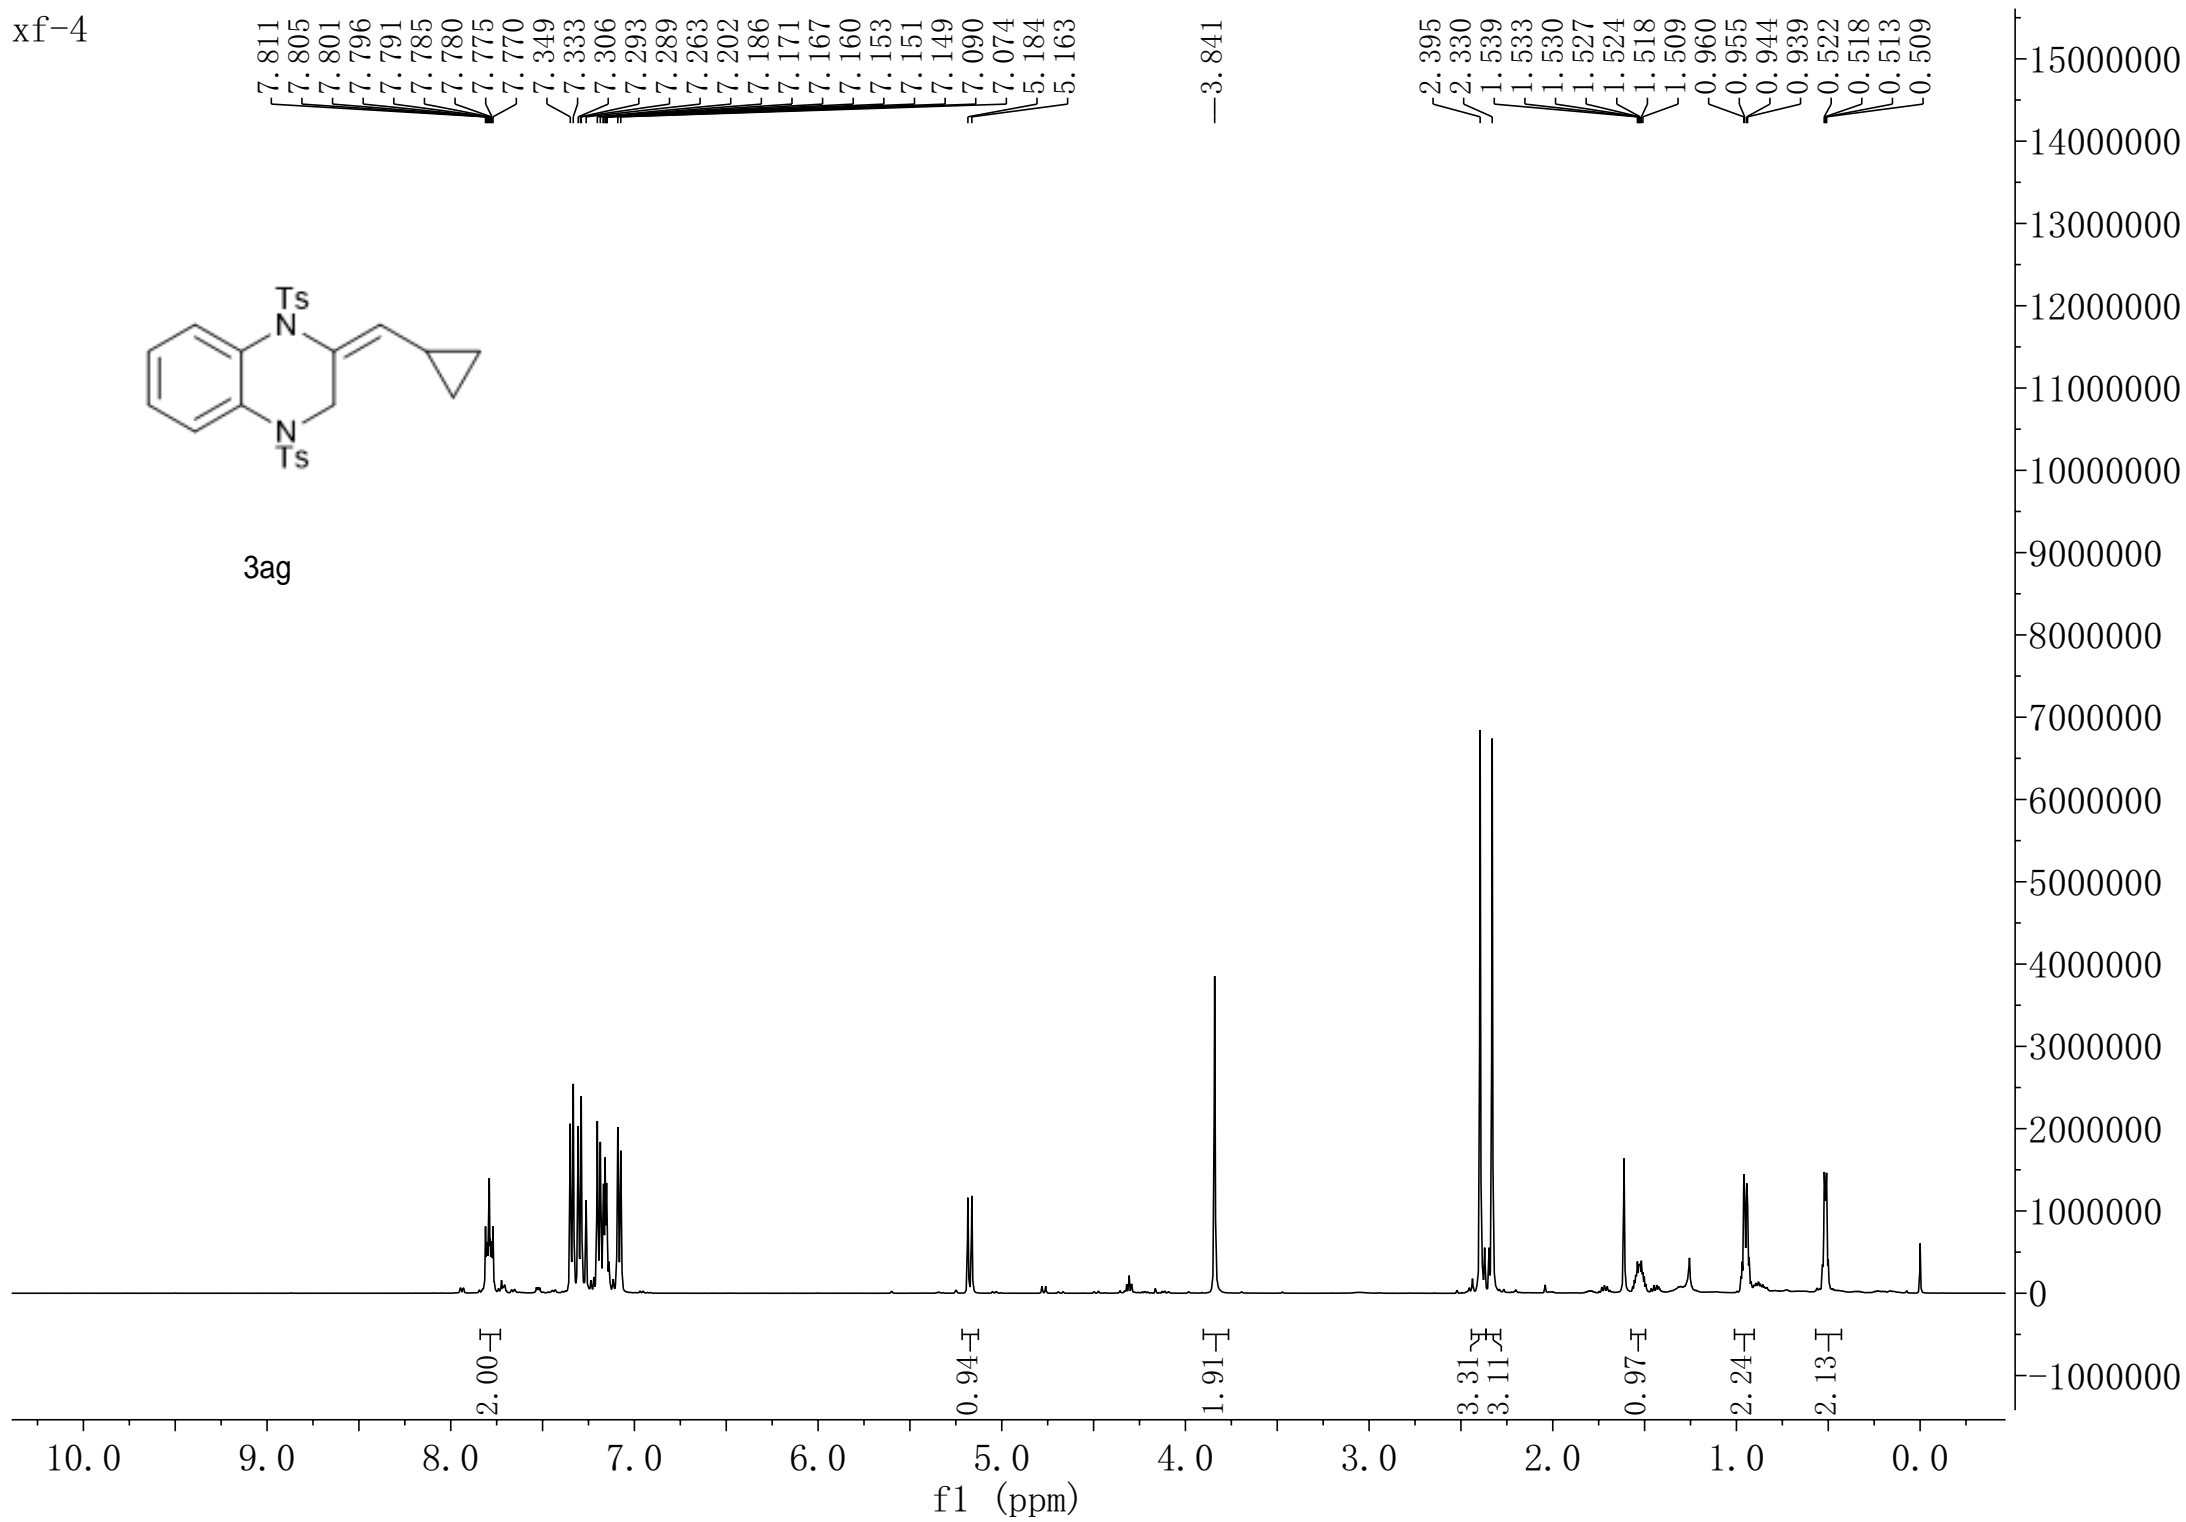

xf-4

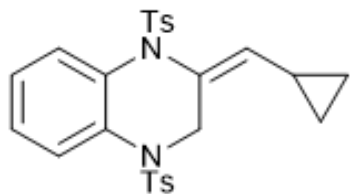

3ag

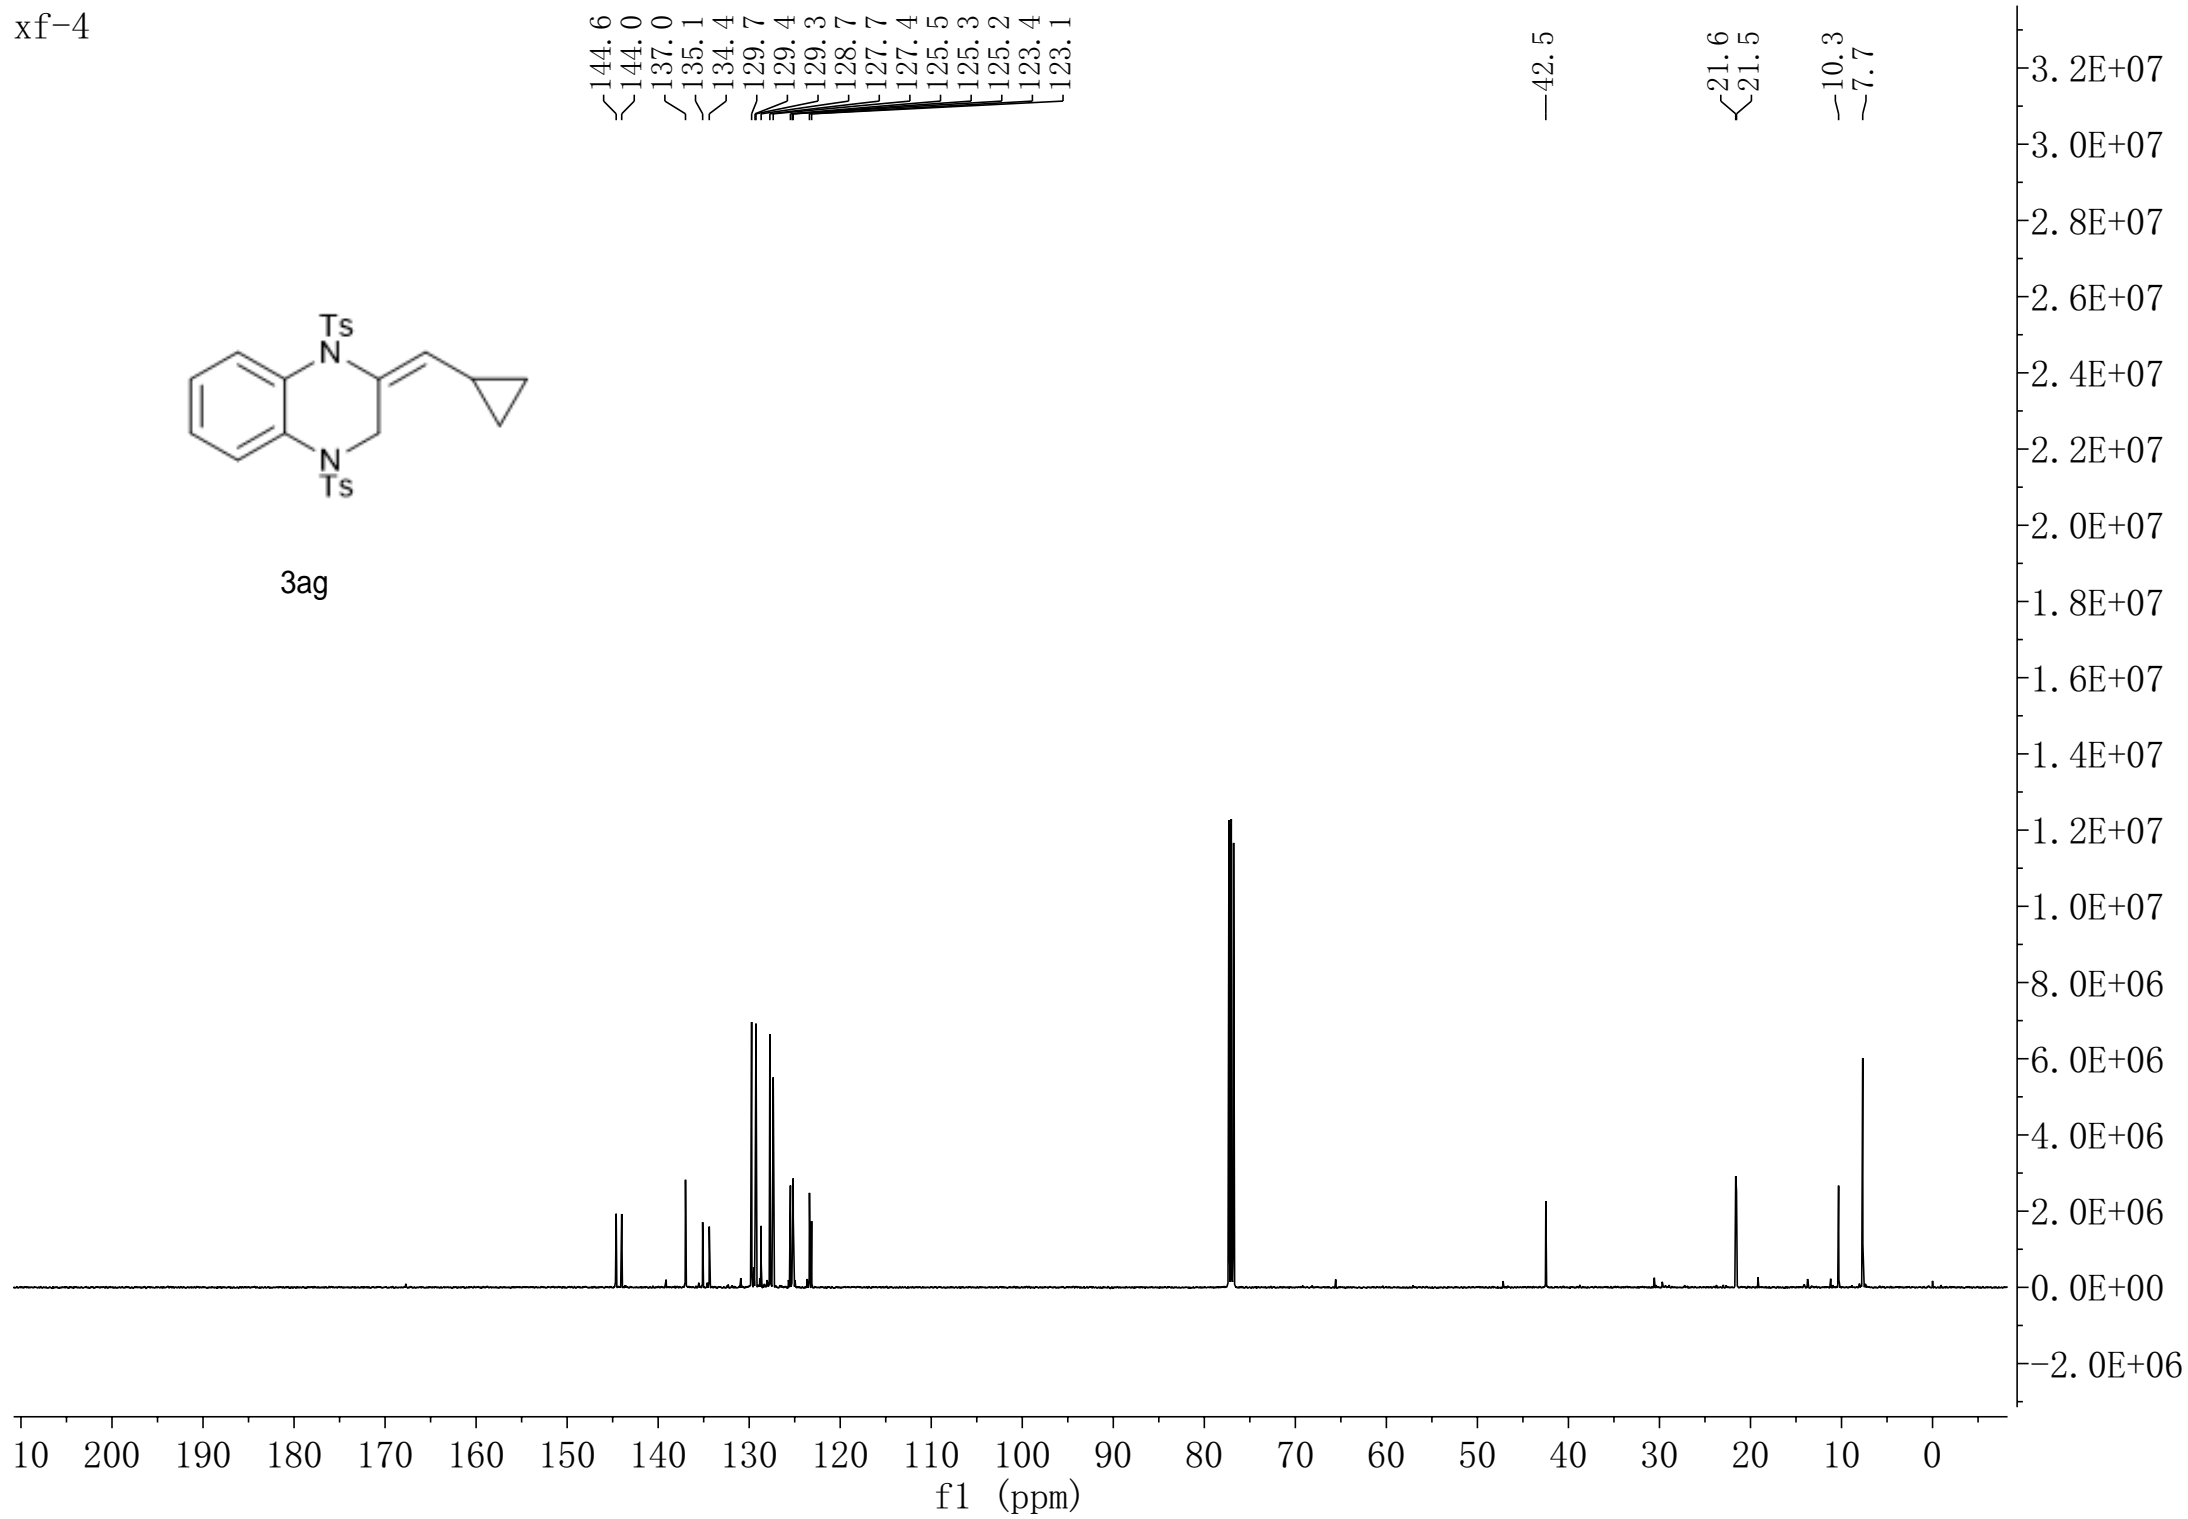

xf-25

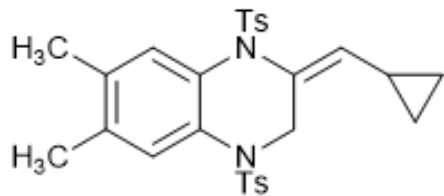

3bg

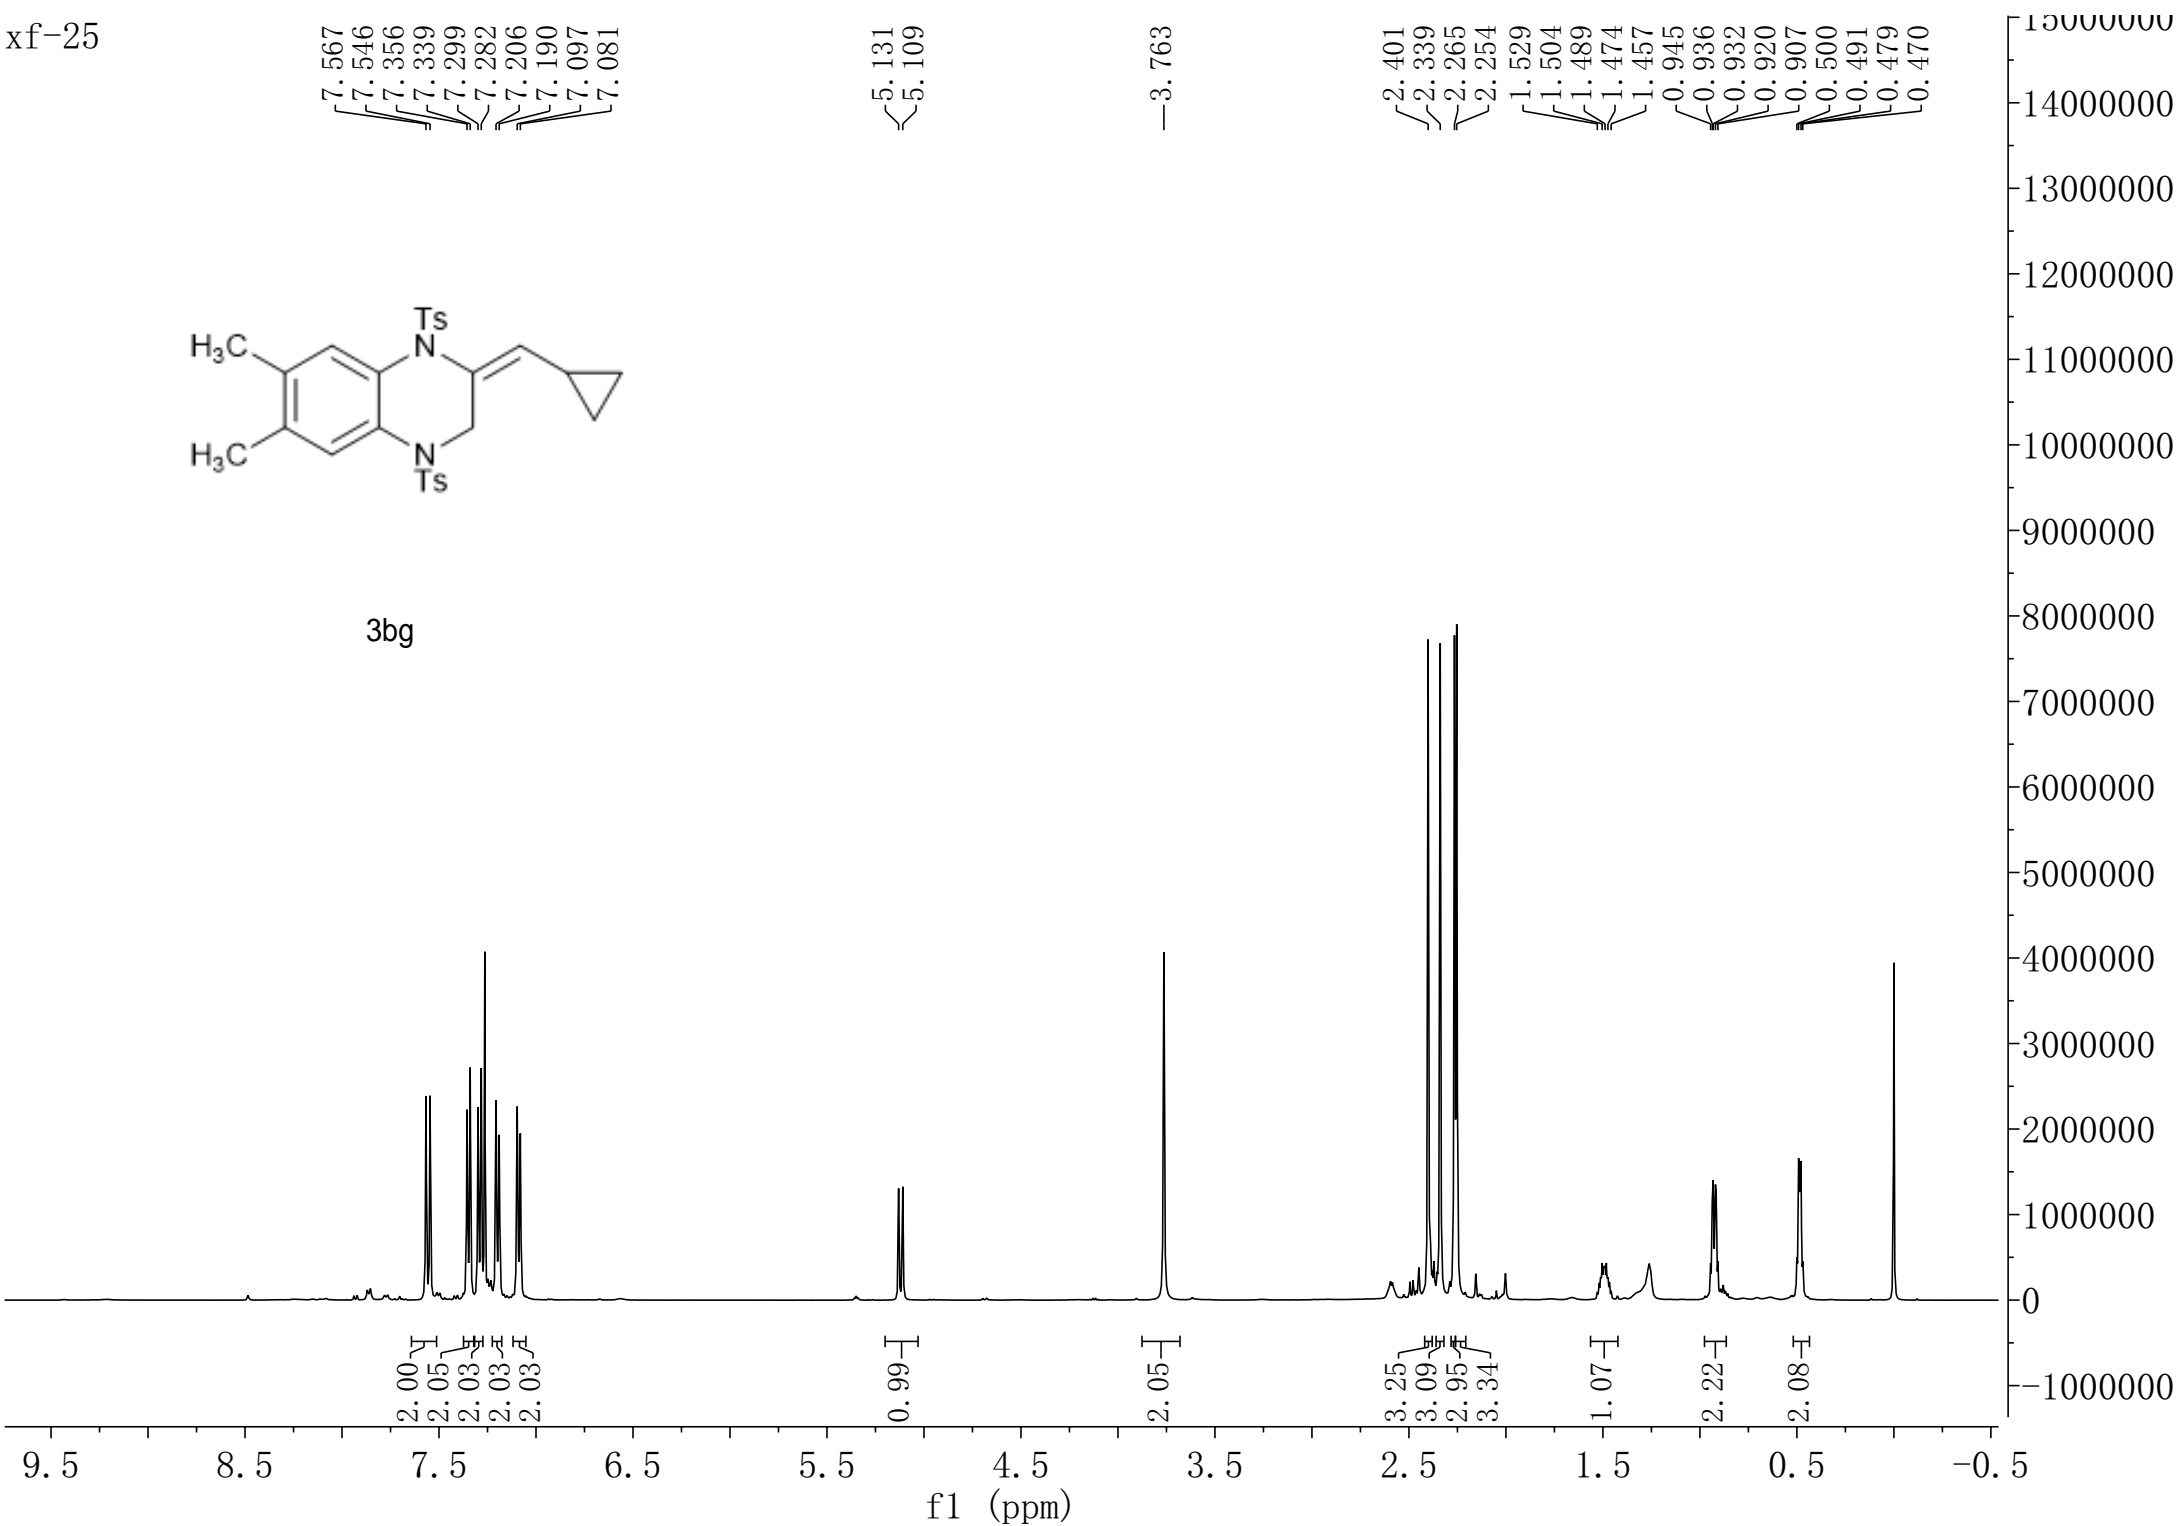

XF-25

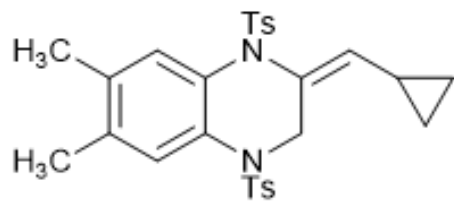

3bg

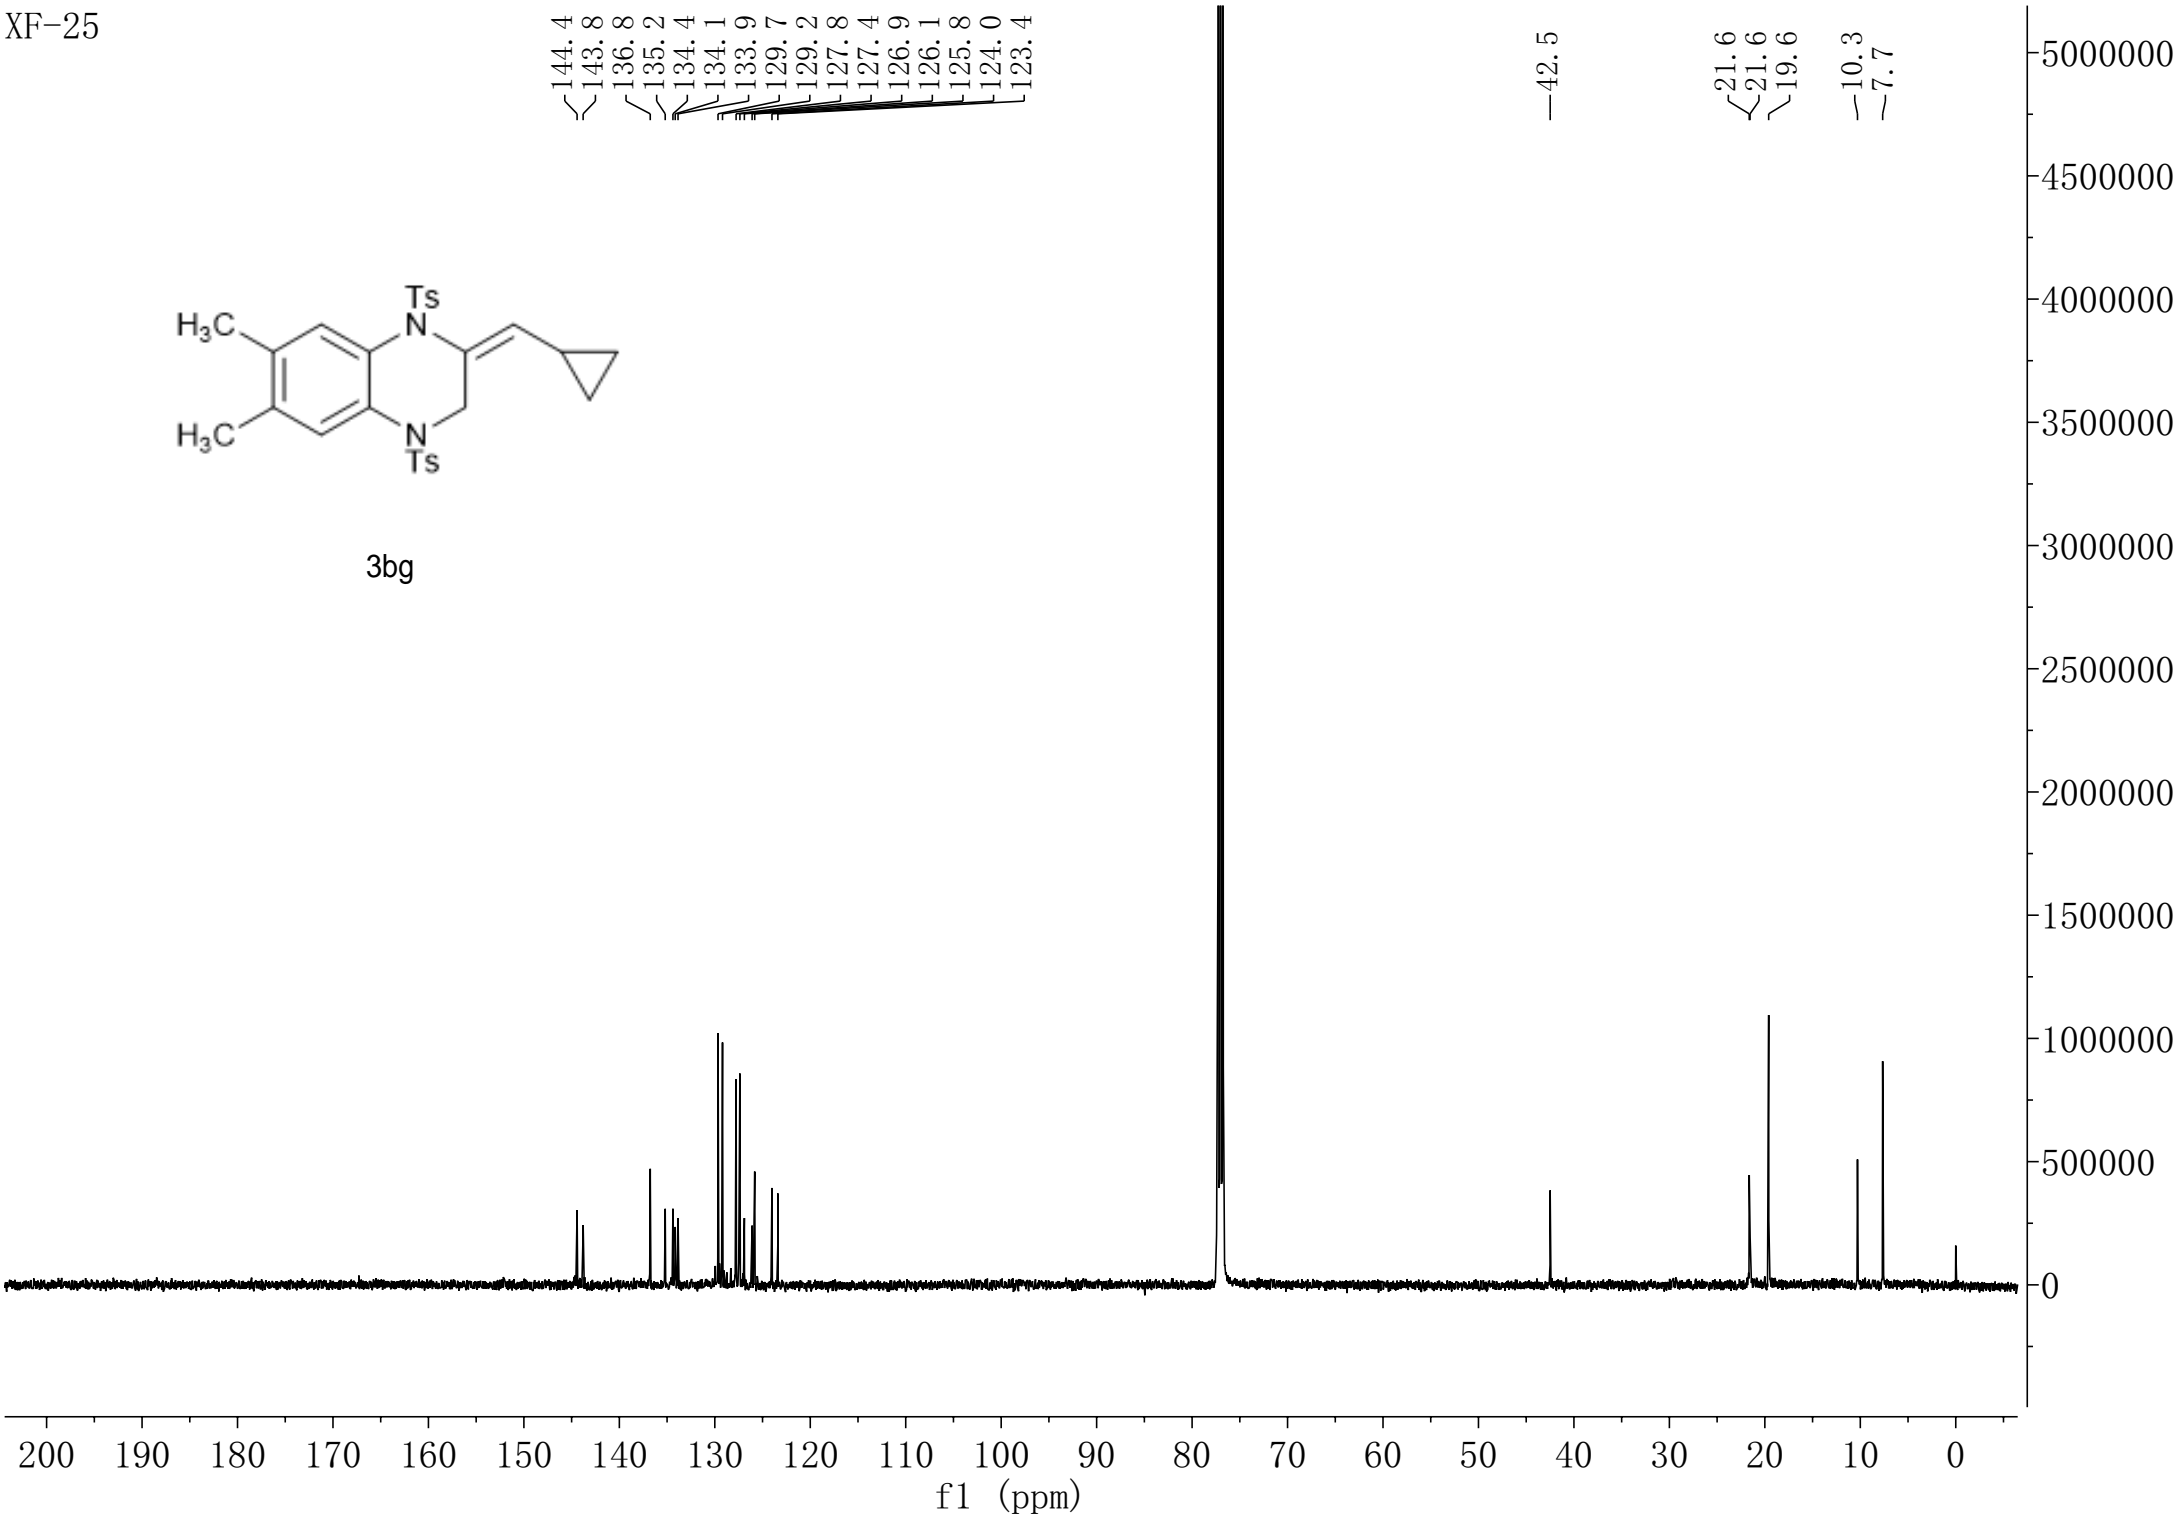

xf-23

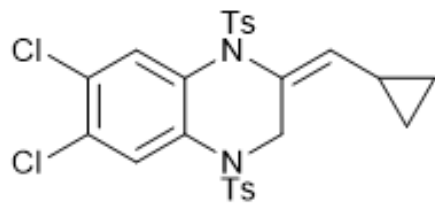

3dg

145.2  
144.6  
138.2  
134.6  
133.9  
130.0  
129.6  
128.9  
128.5  
128.3  
127.9  
127.8  
127.5  
126.0  
124.1  
121.9

41.8

21.7  
21.6

10.5  
7.8

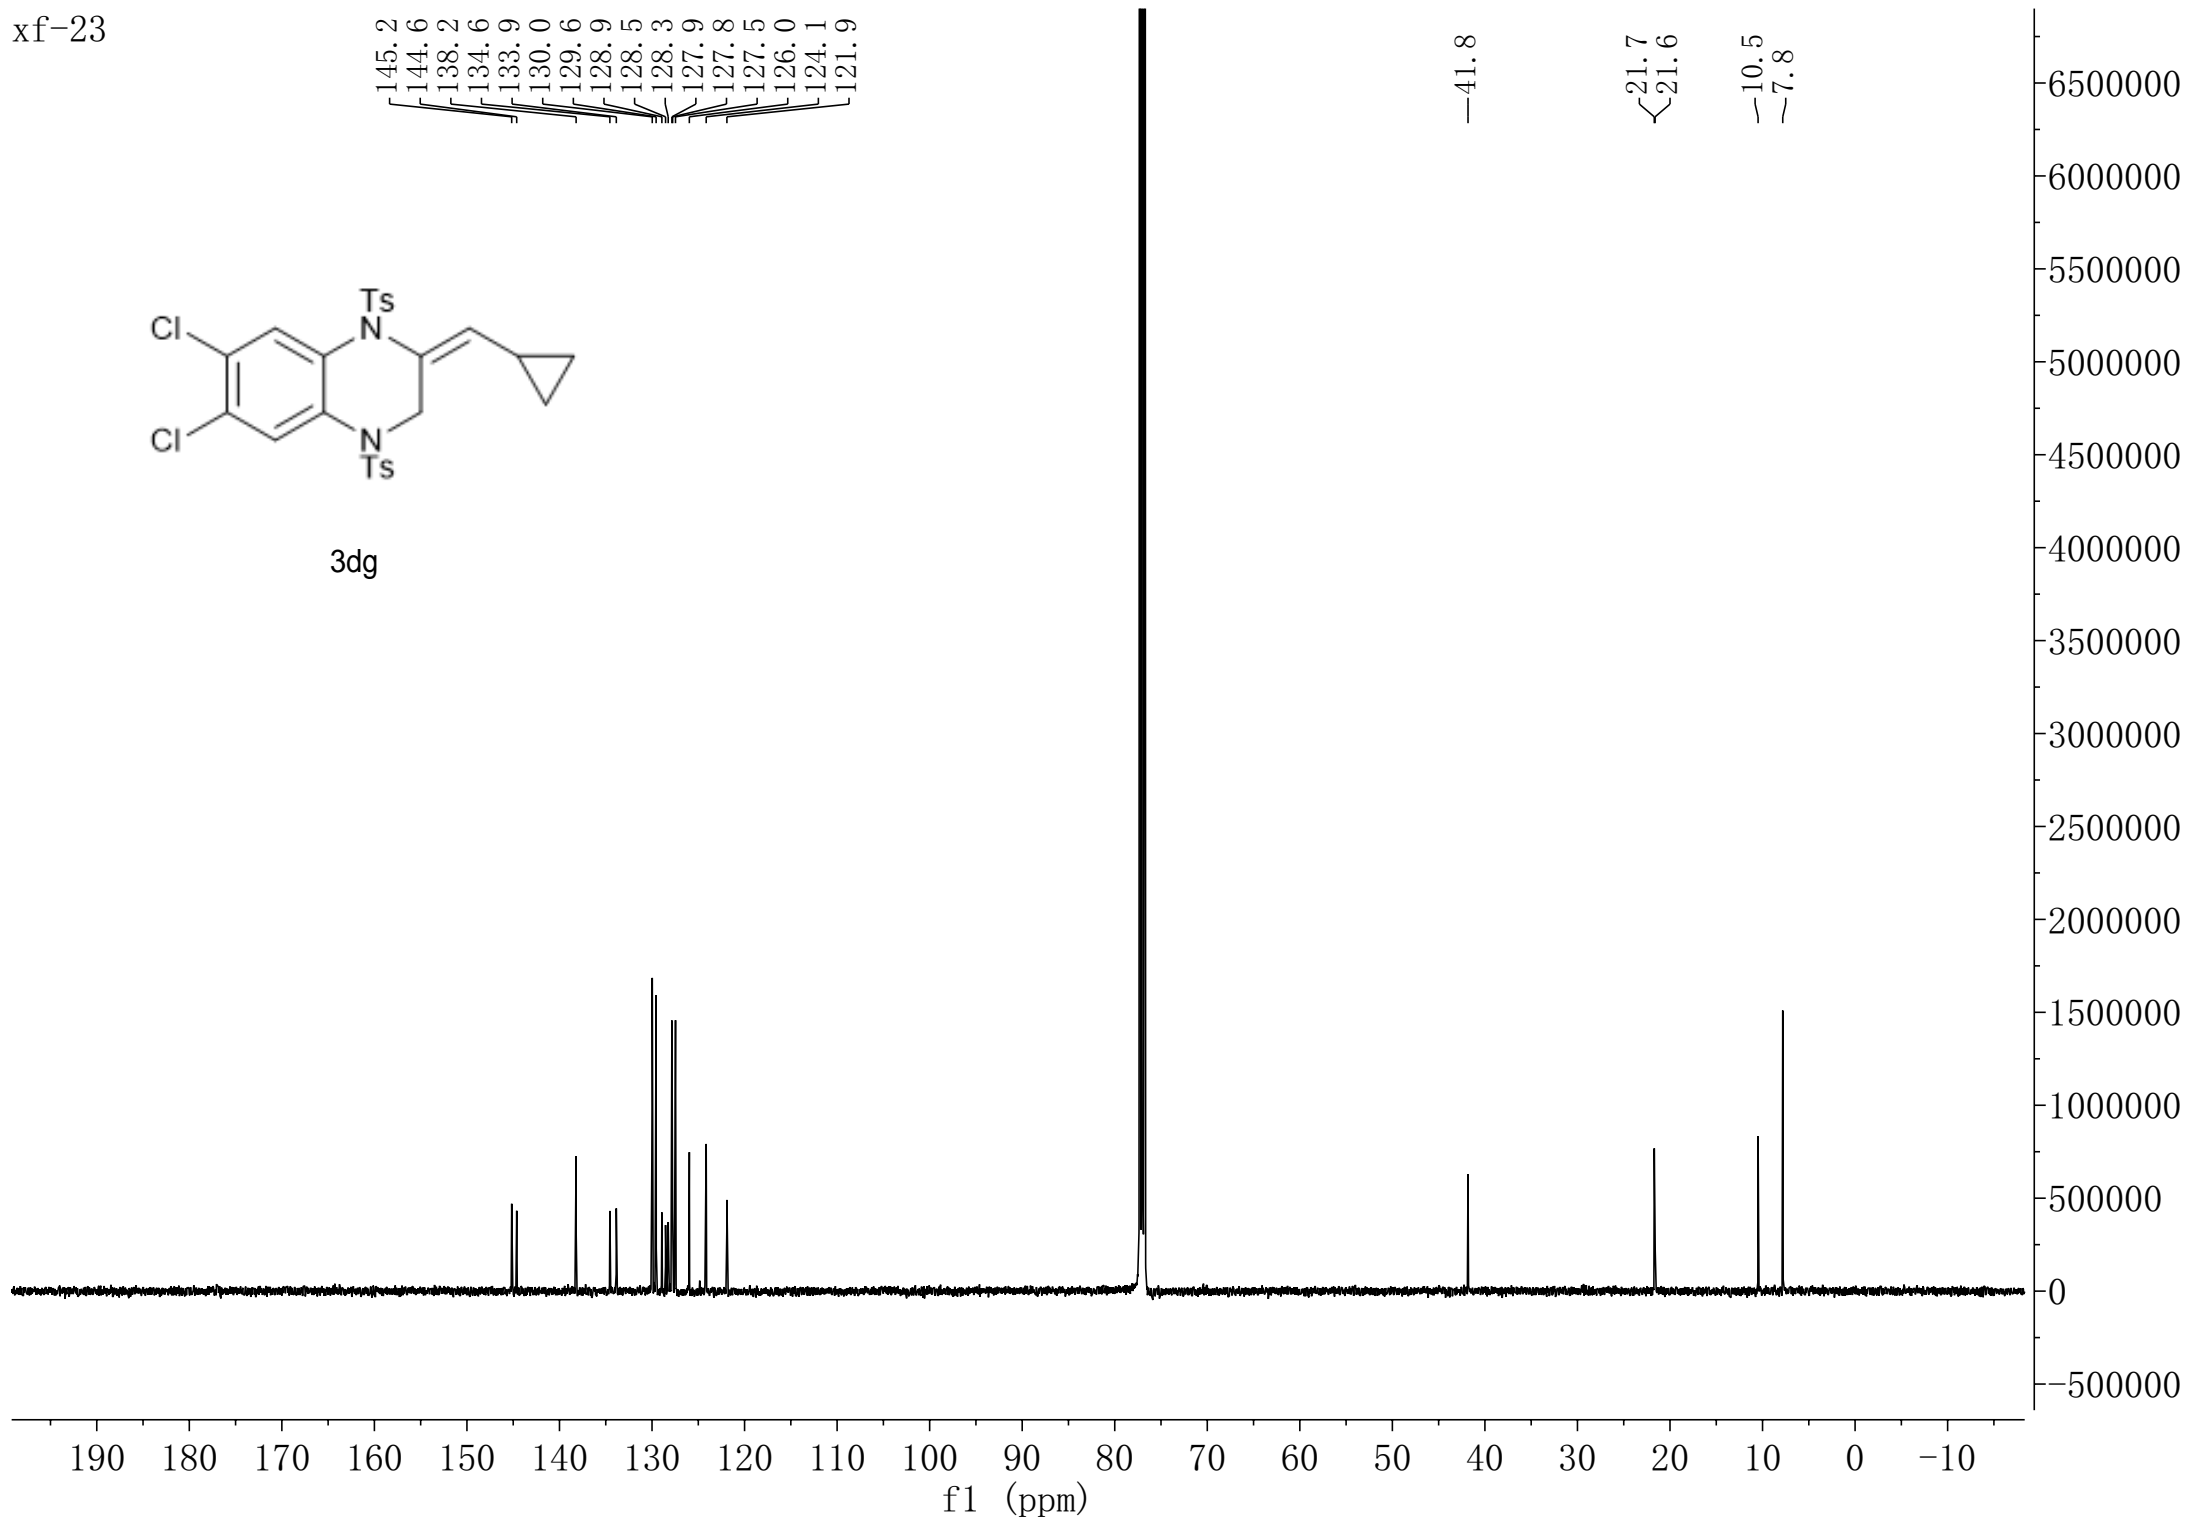

xf-23

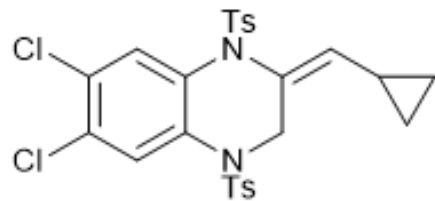

3dg

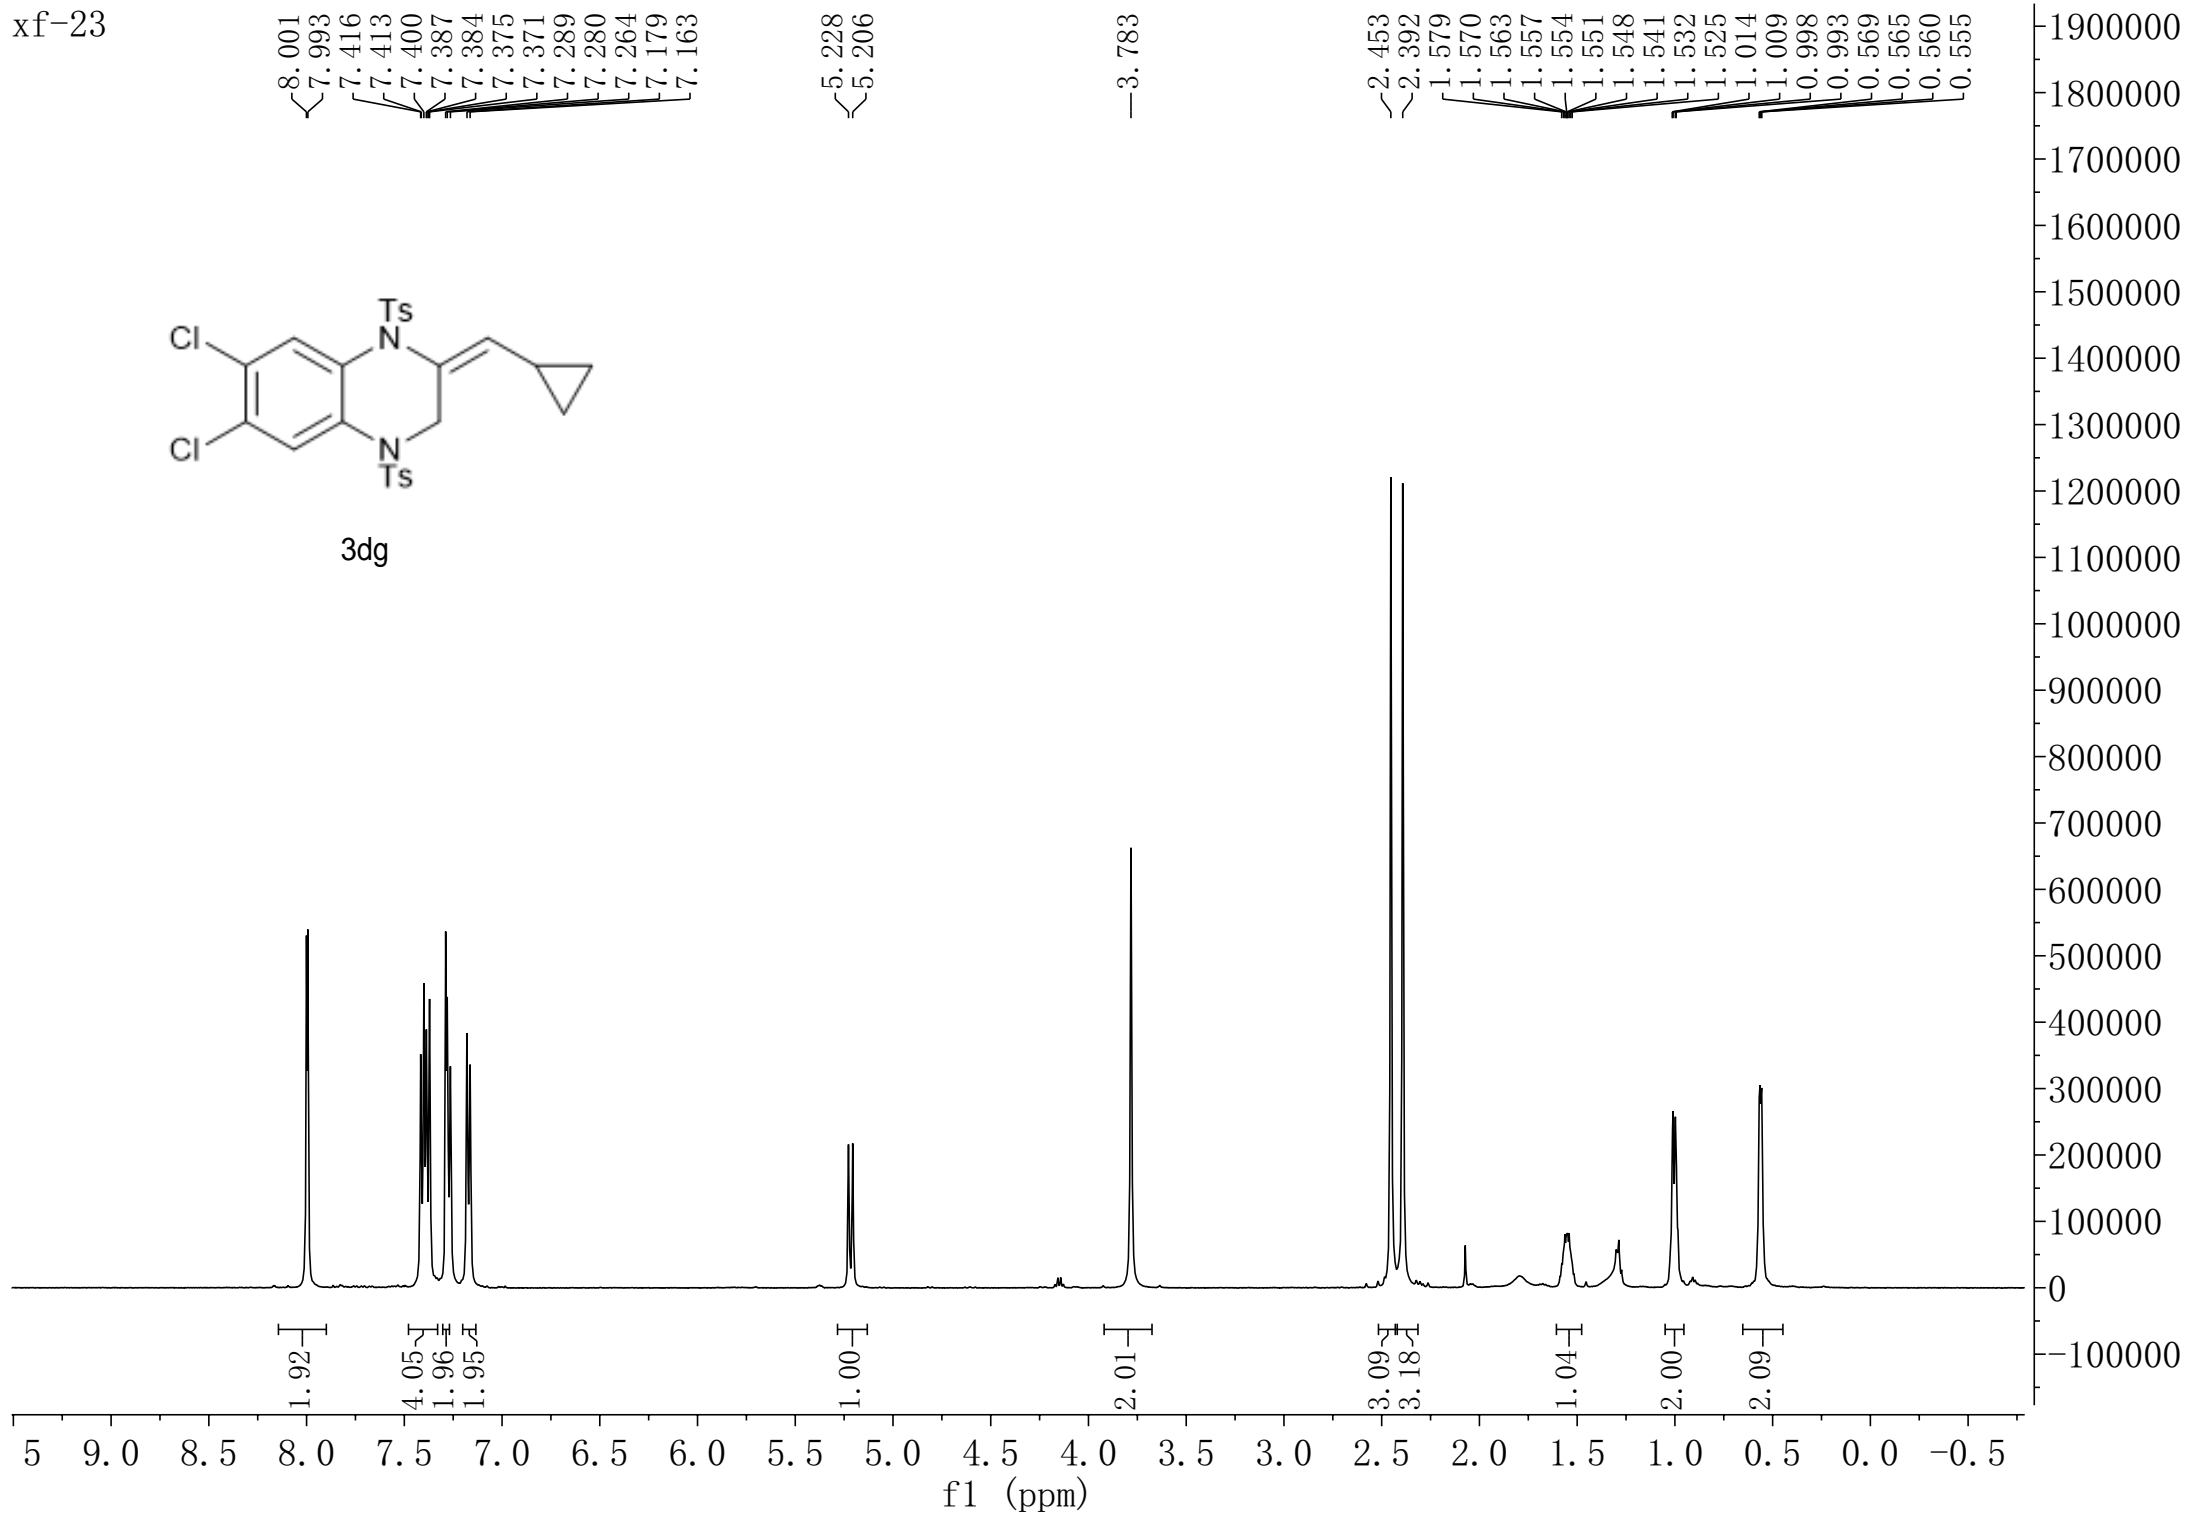

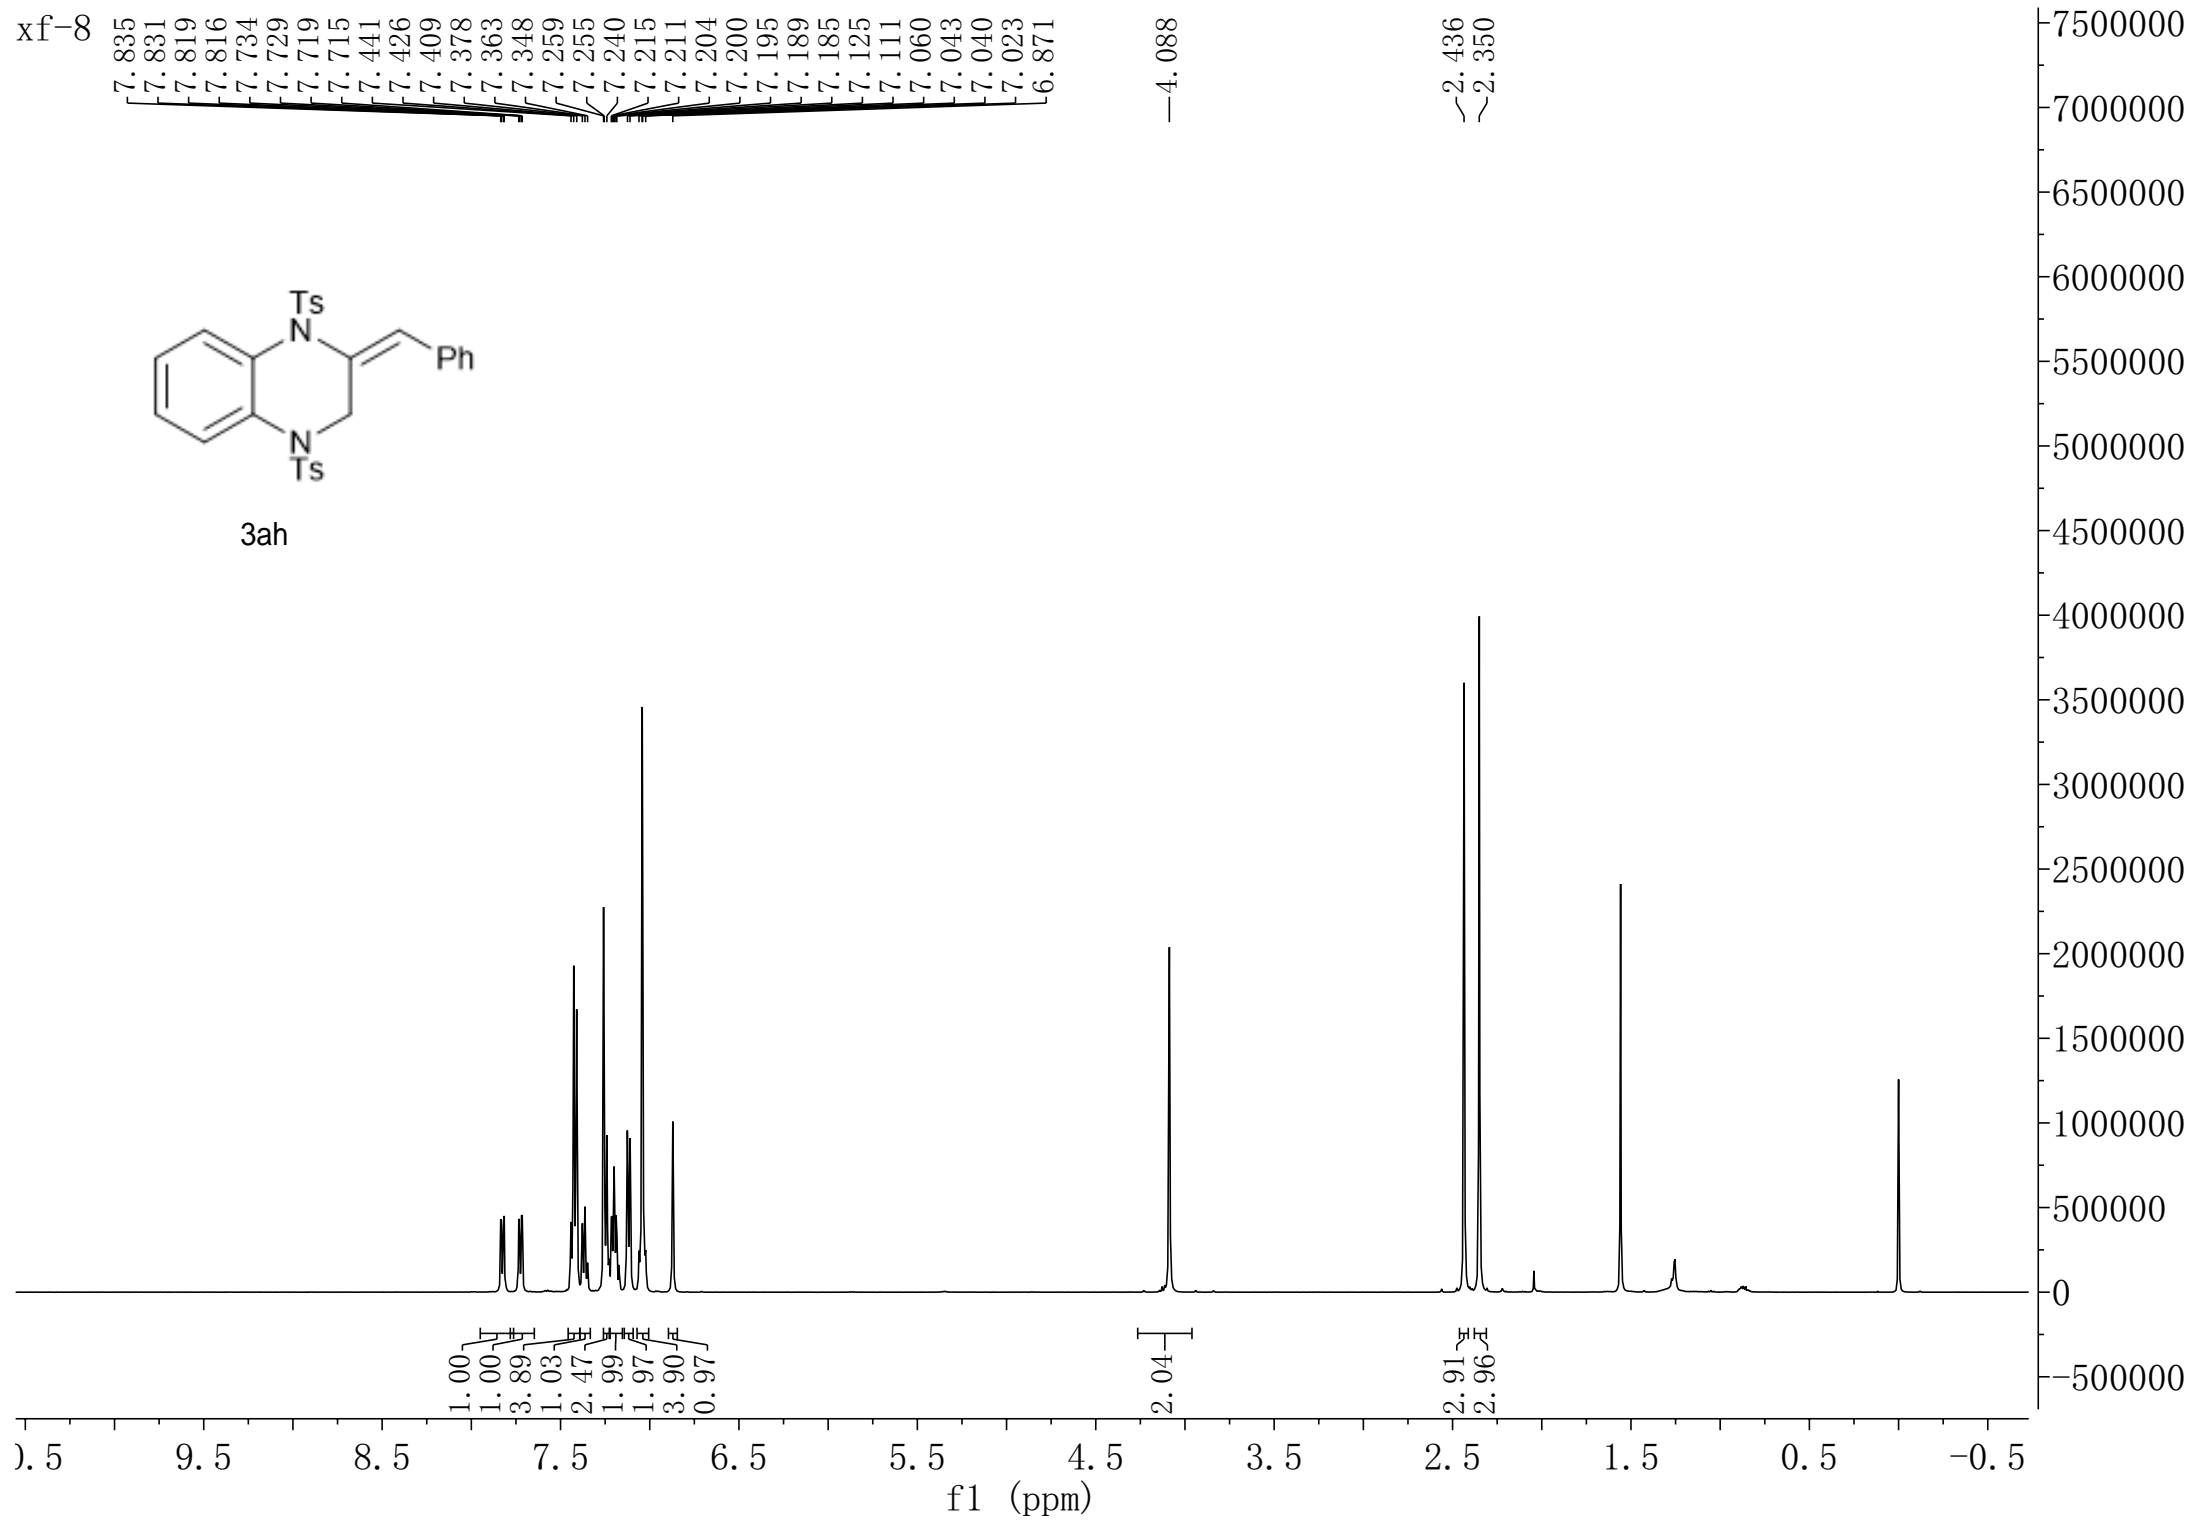

xf-8

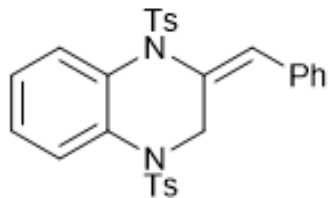

3ah

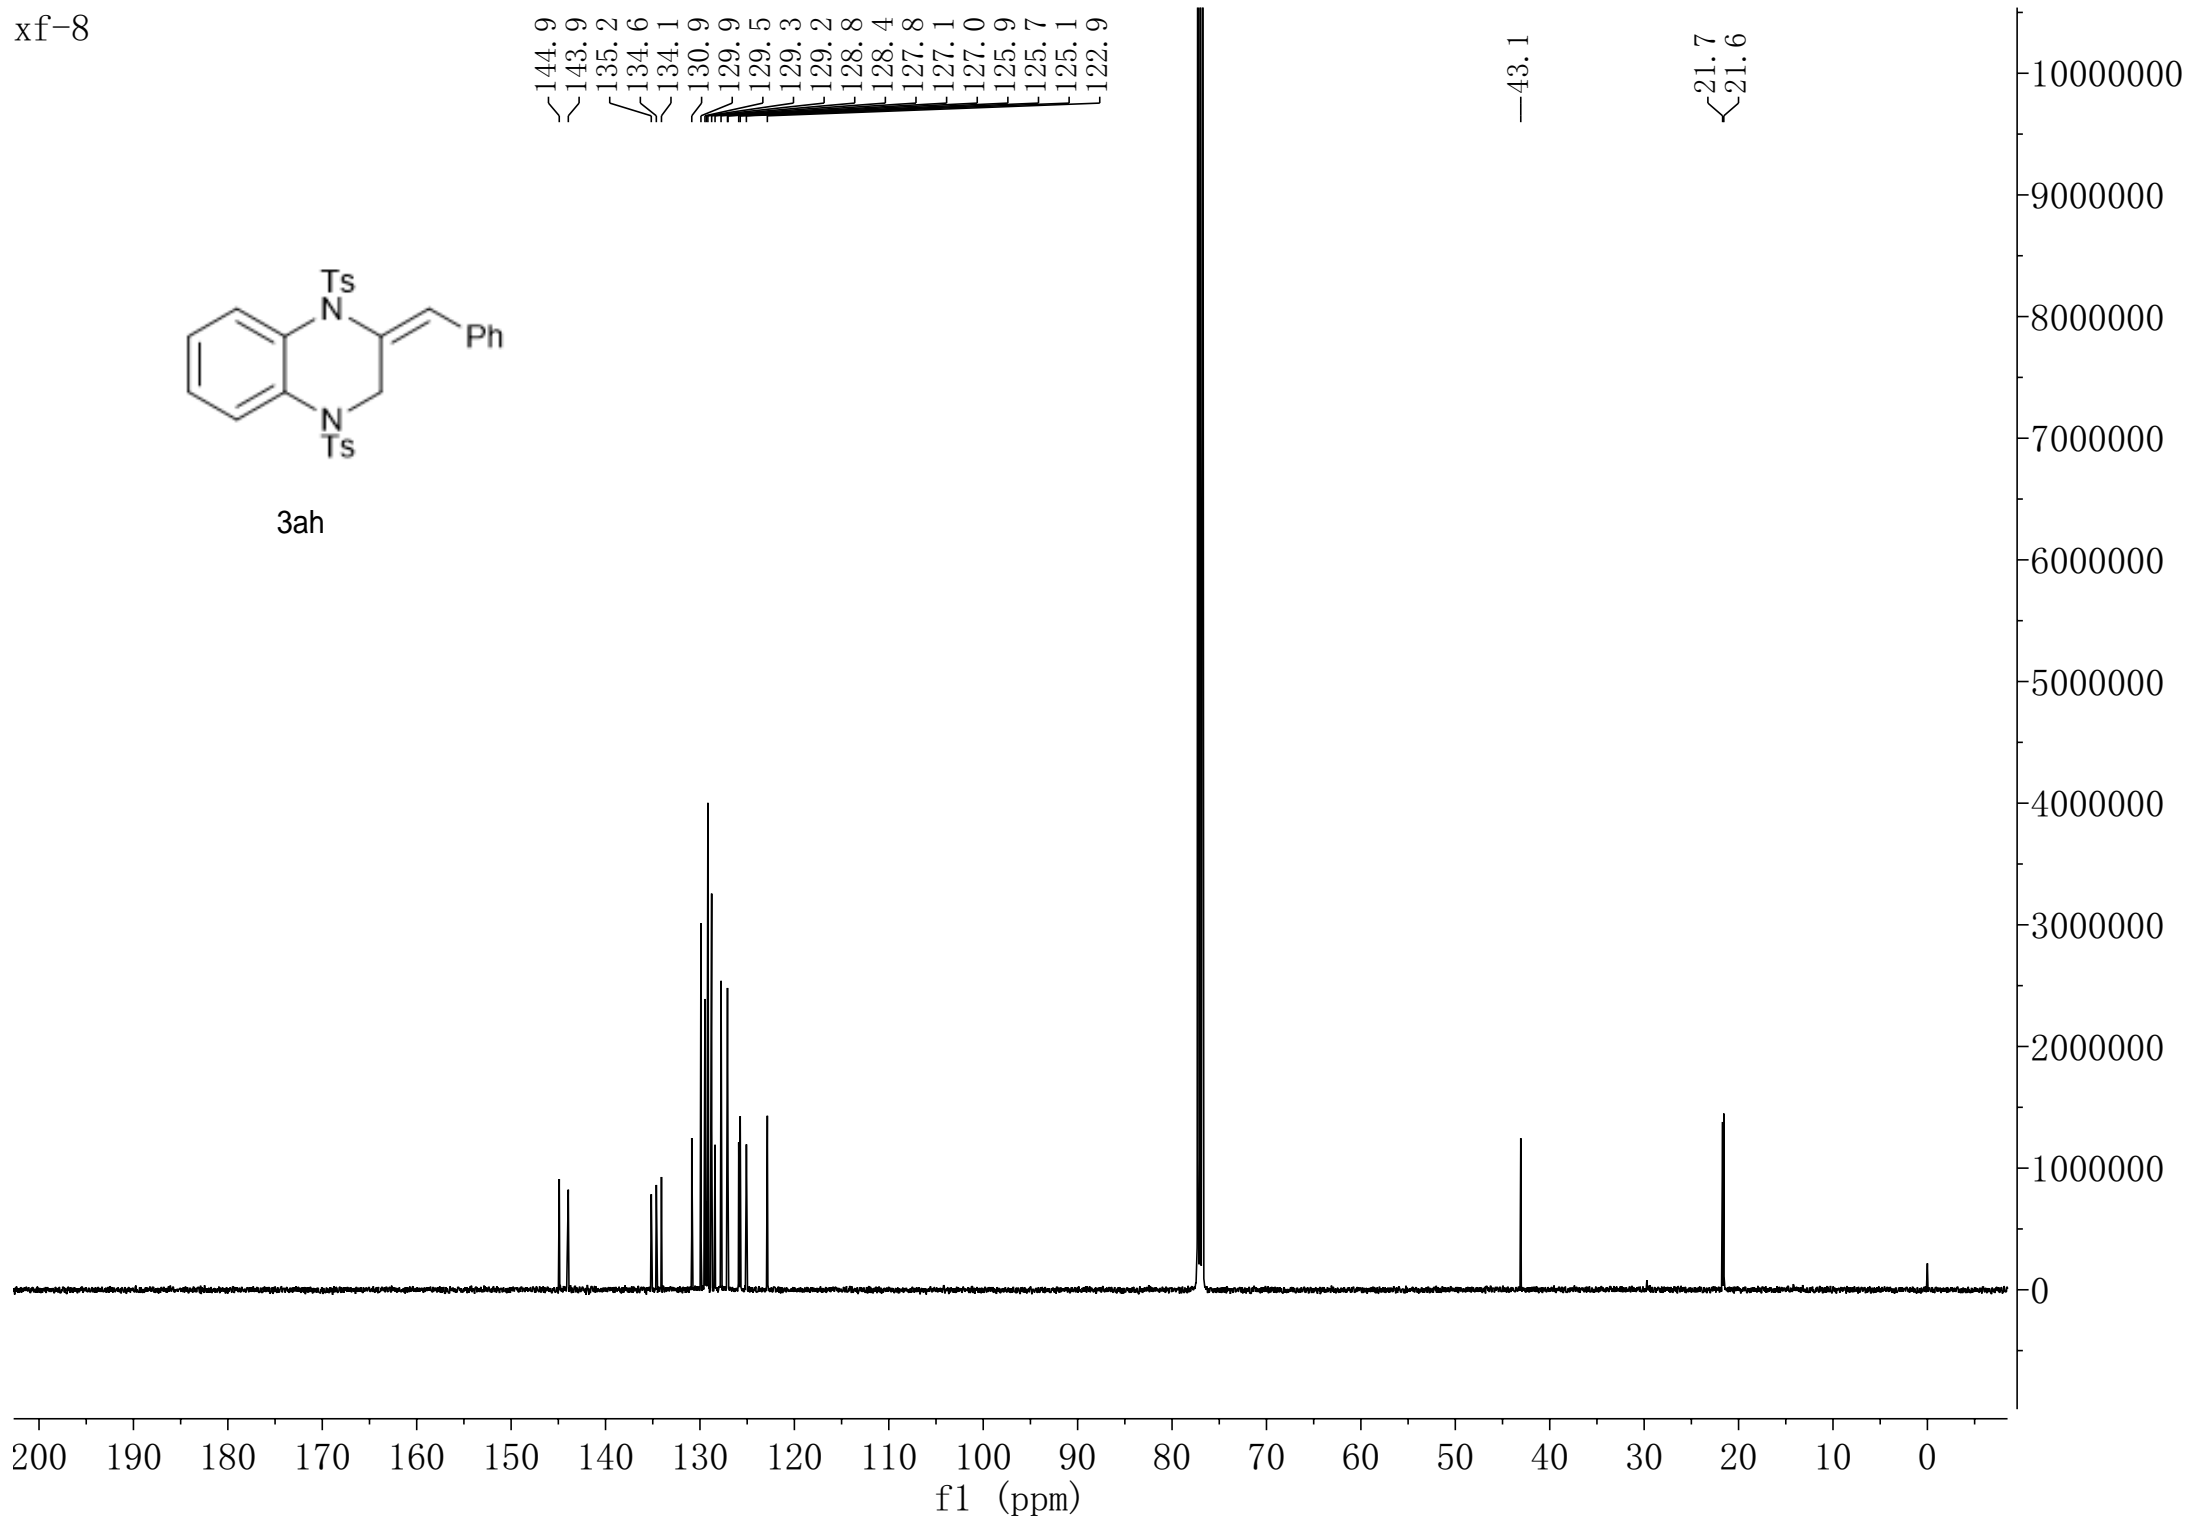



xf-26

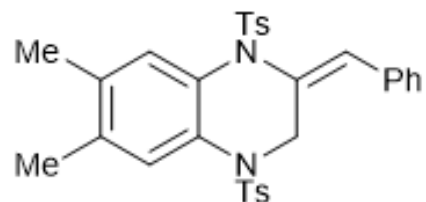

3b

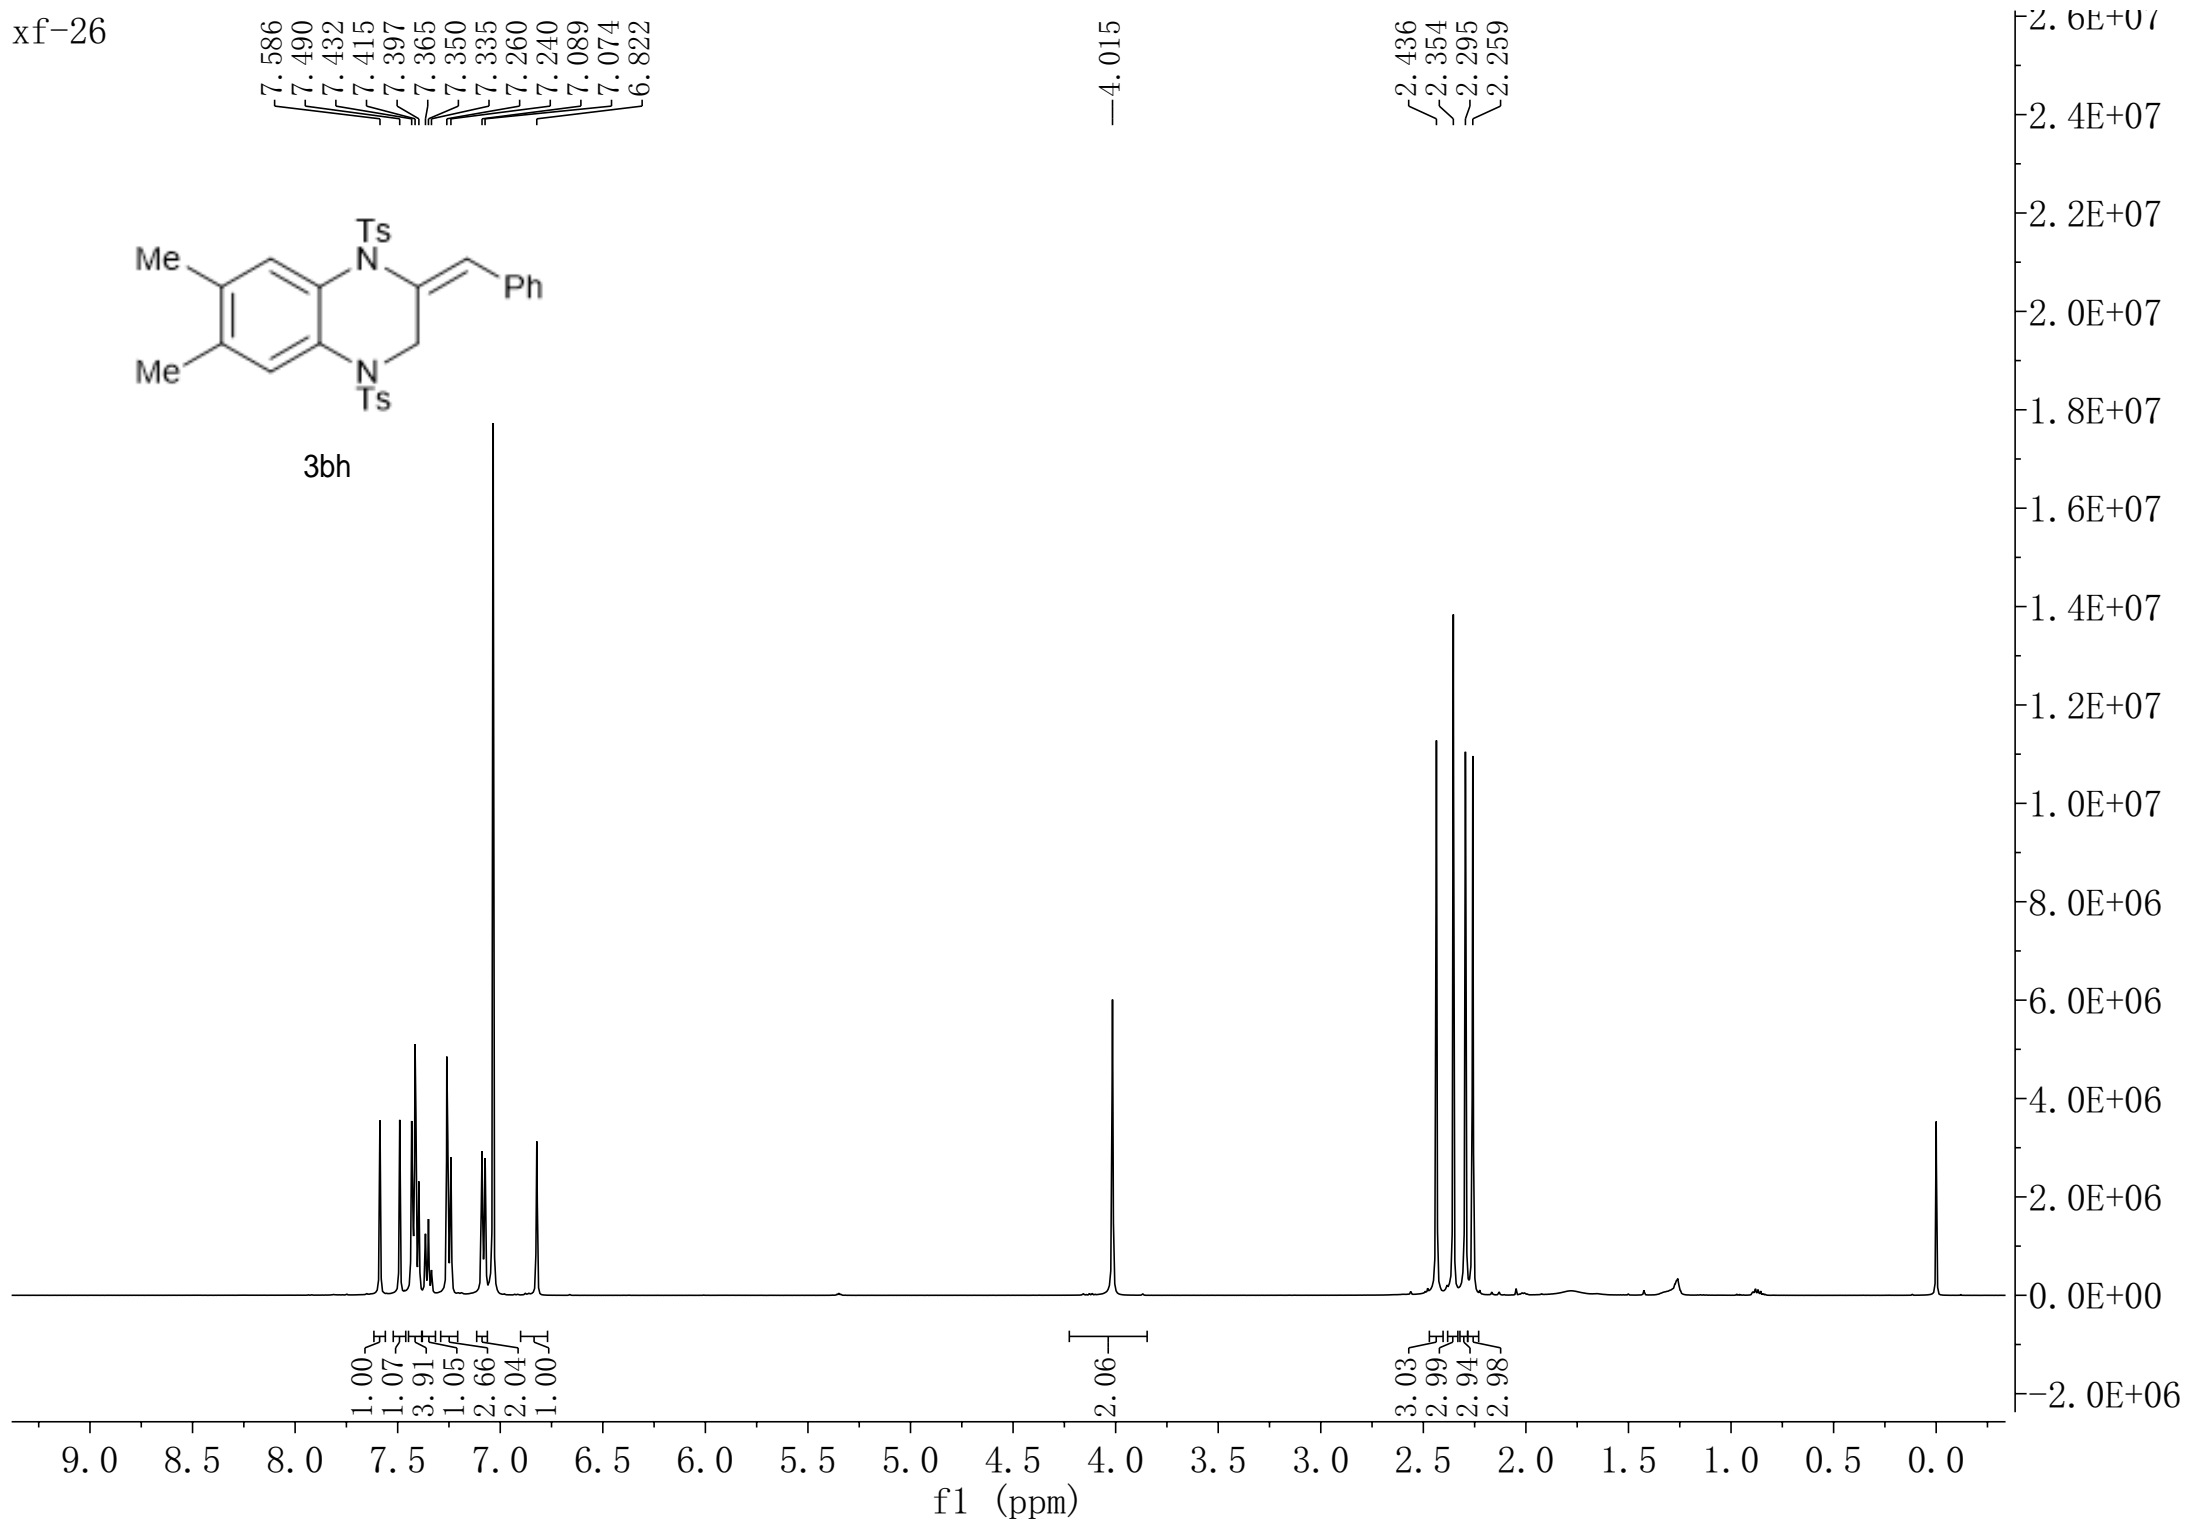

xf-26

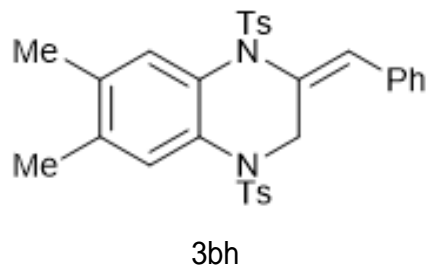

144.8  
143.7  
135.2  
134.7  
134.6  
134.2  
133.8  
130.6  
129.9  
129.4  
129.2  
128.7  
128.3  
127.8  
127.4  
127.1  
126.9  
126.6  
126.3  
123.6

43.0

21.7  
21.6  
19.7  
19.6

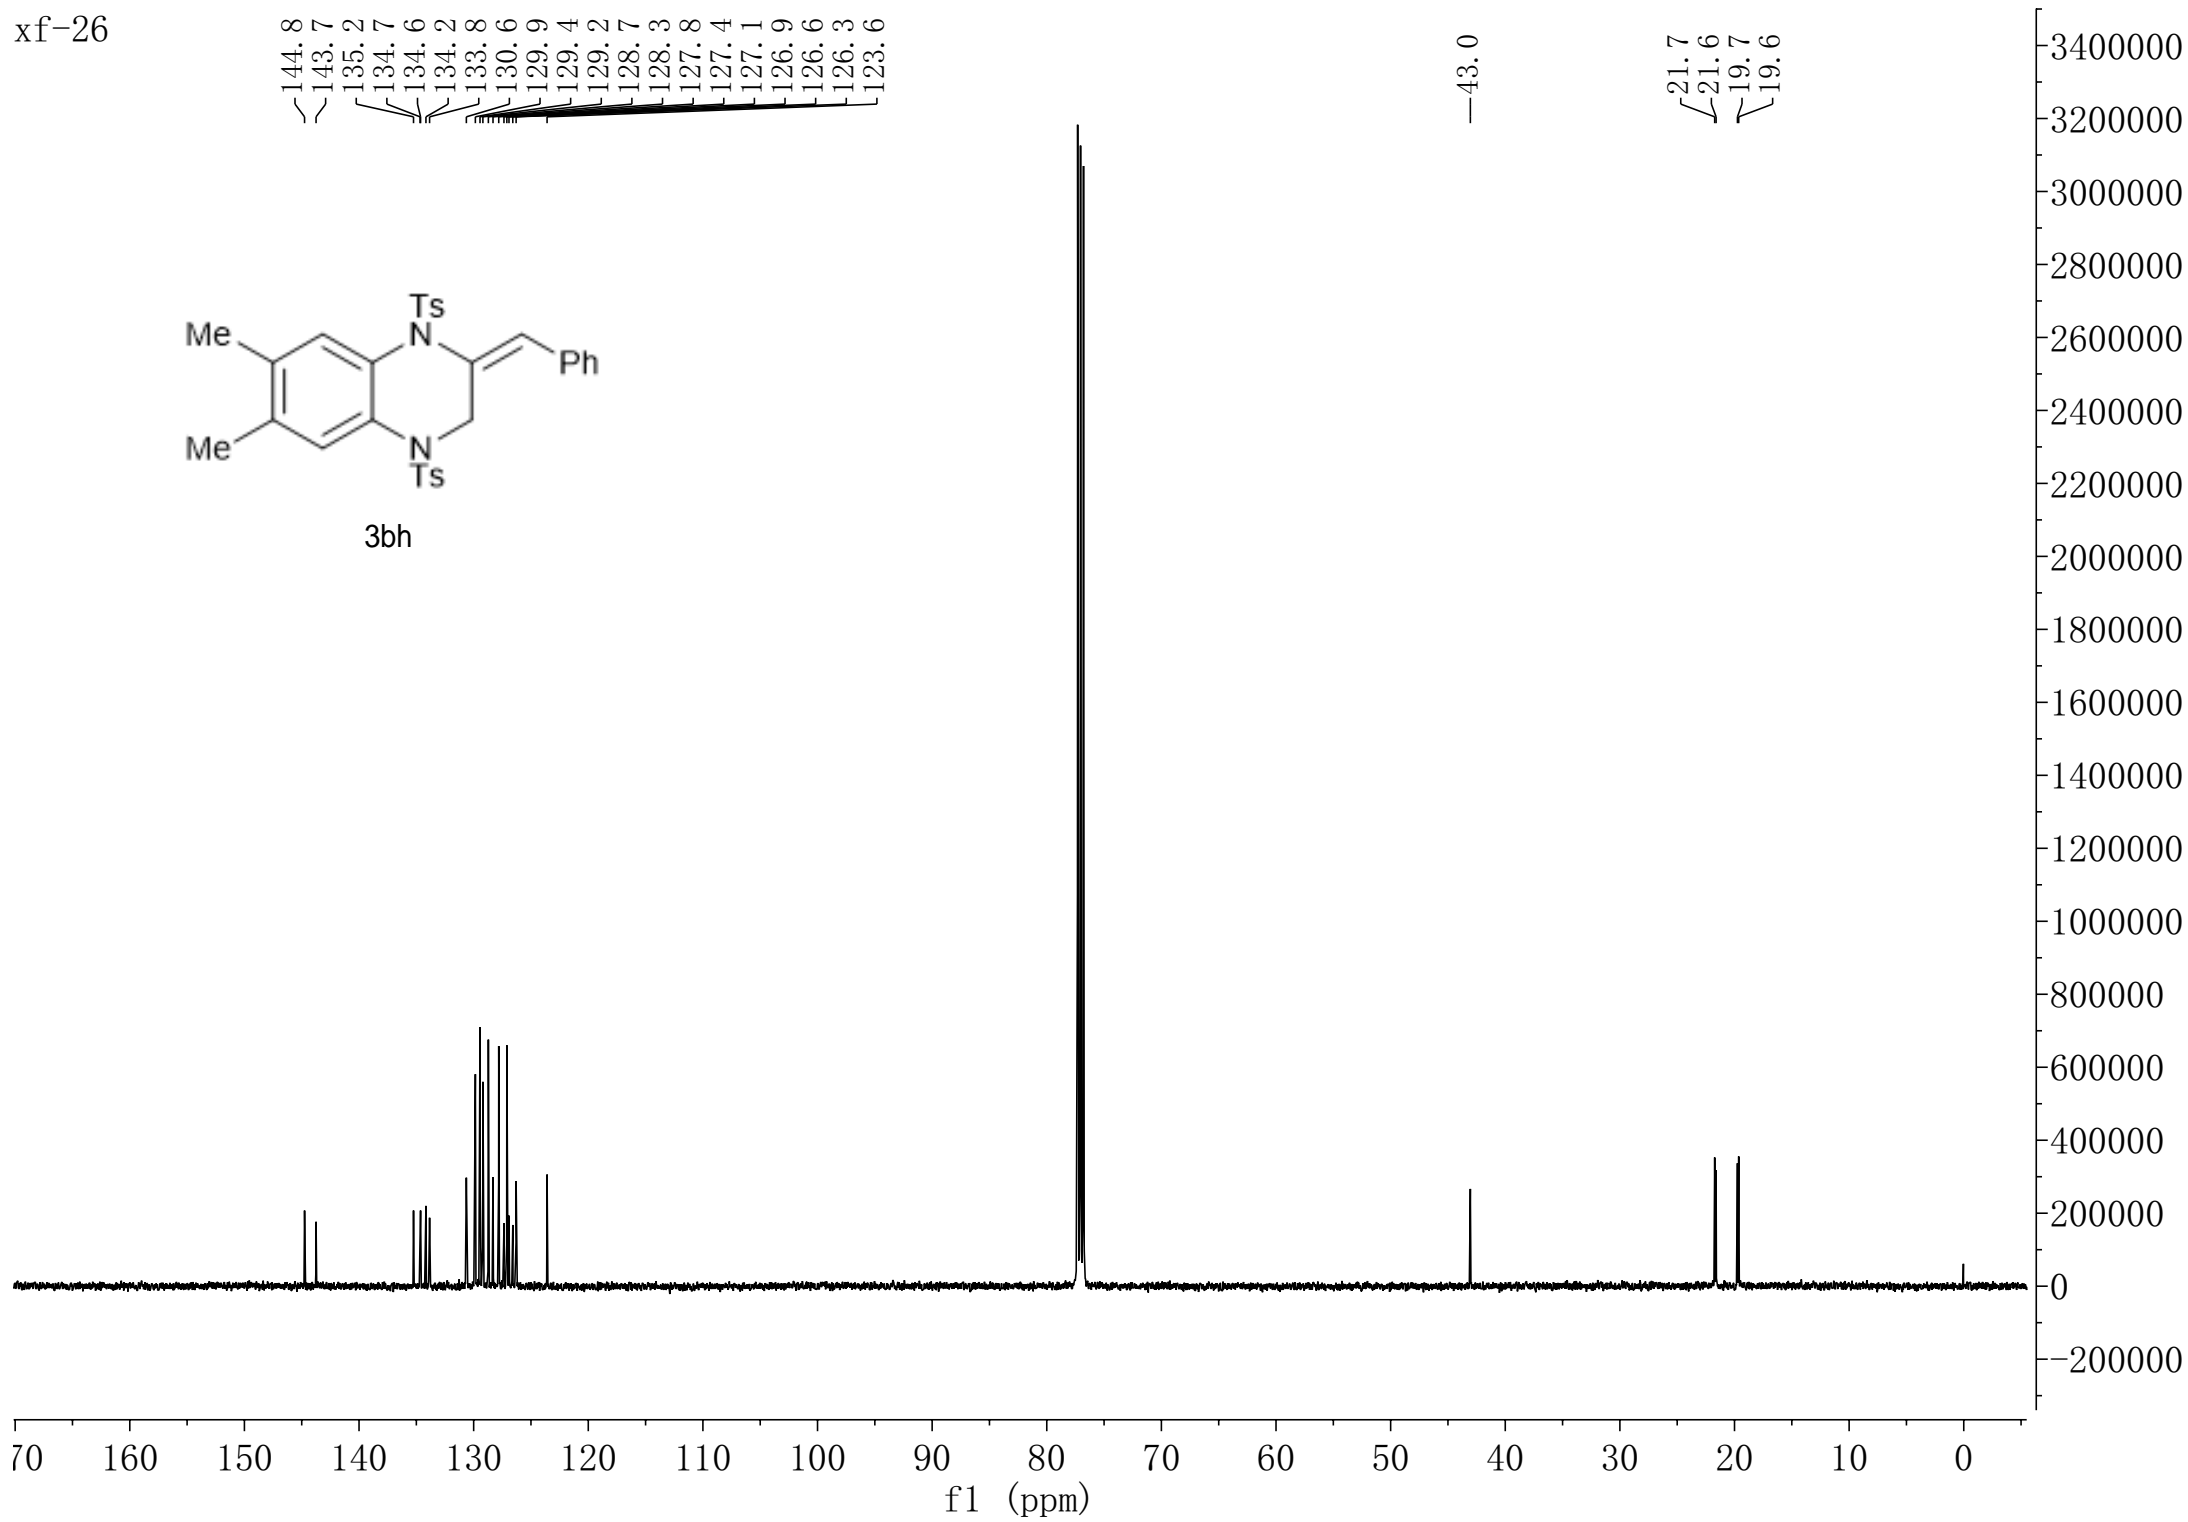

xf-28

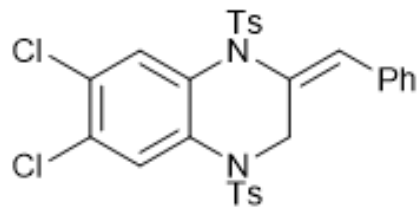

3dh

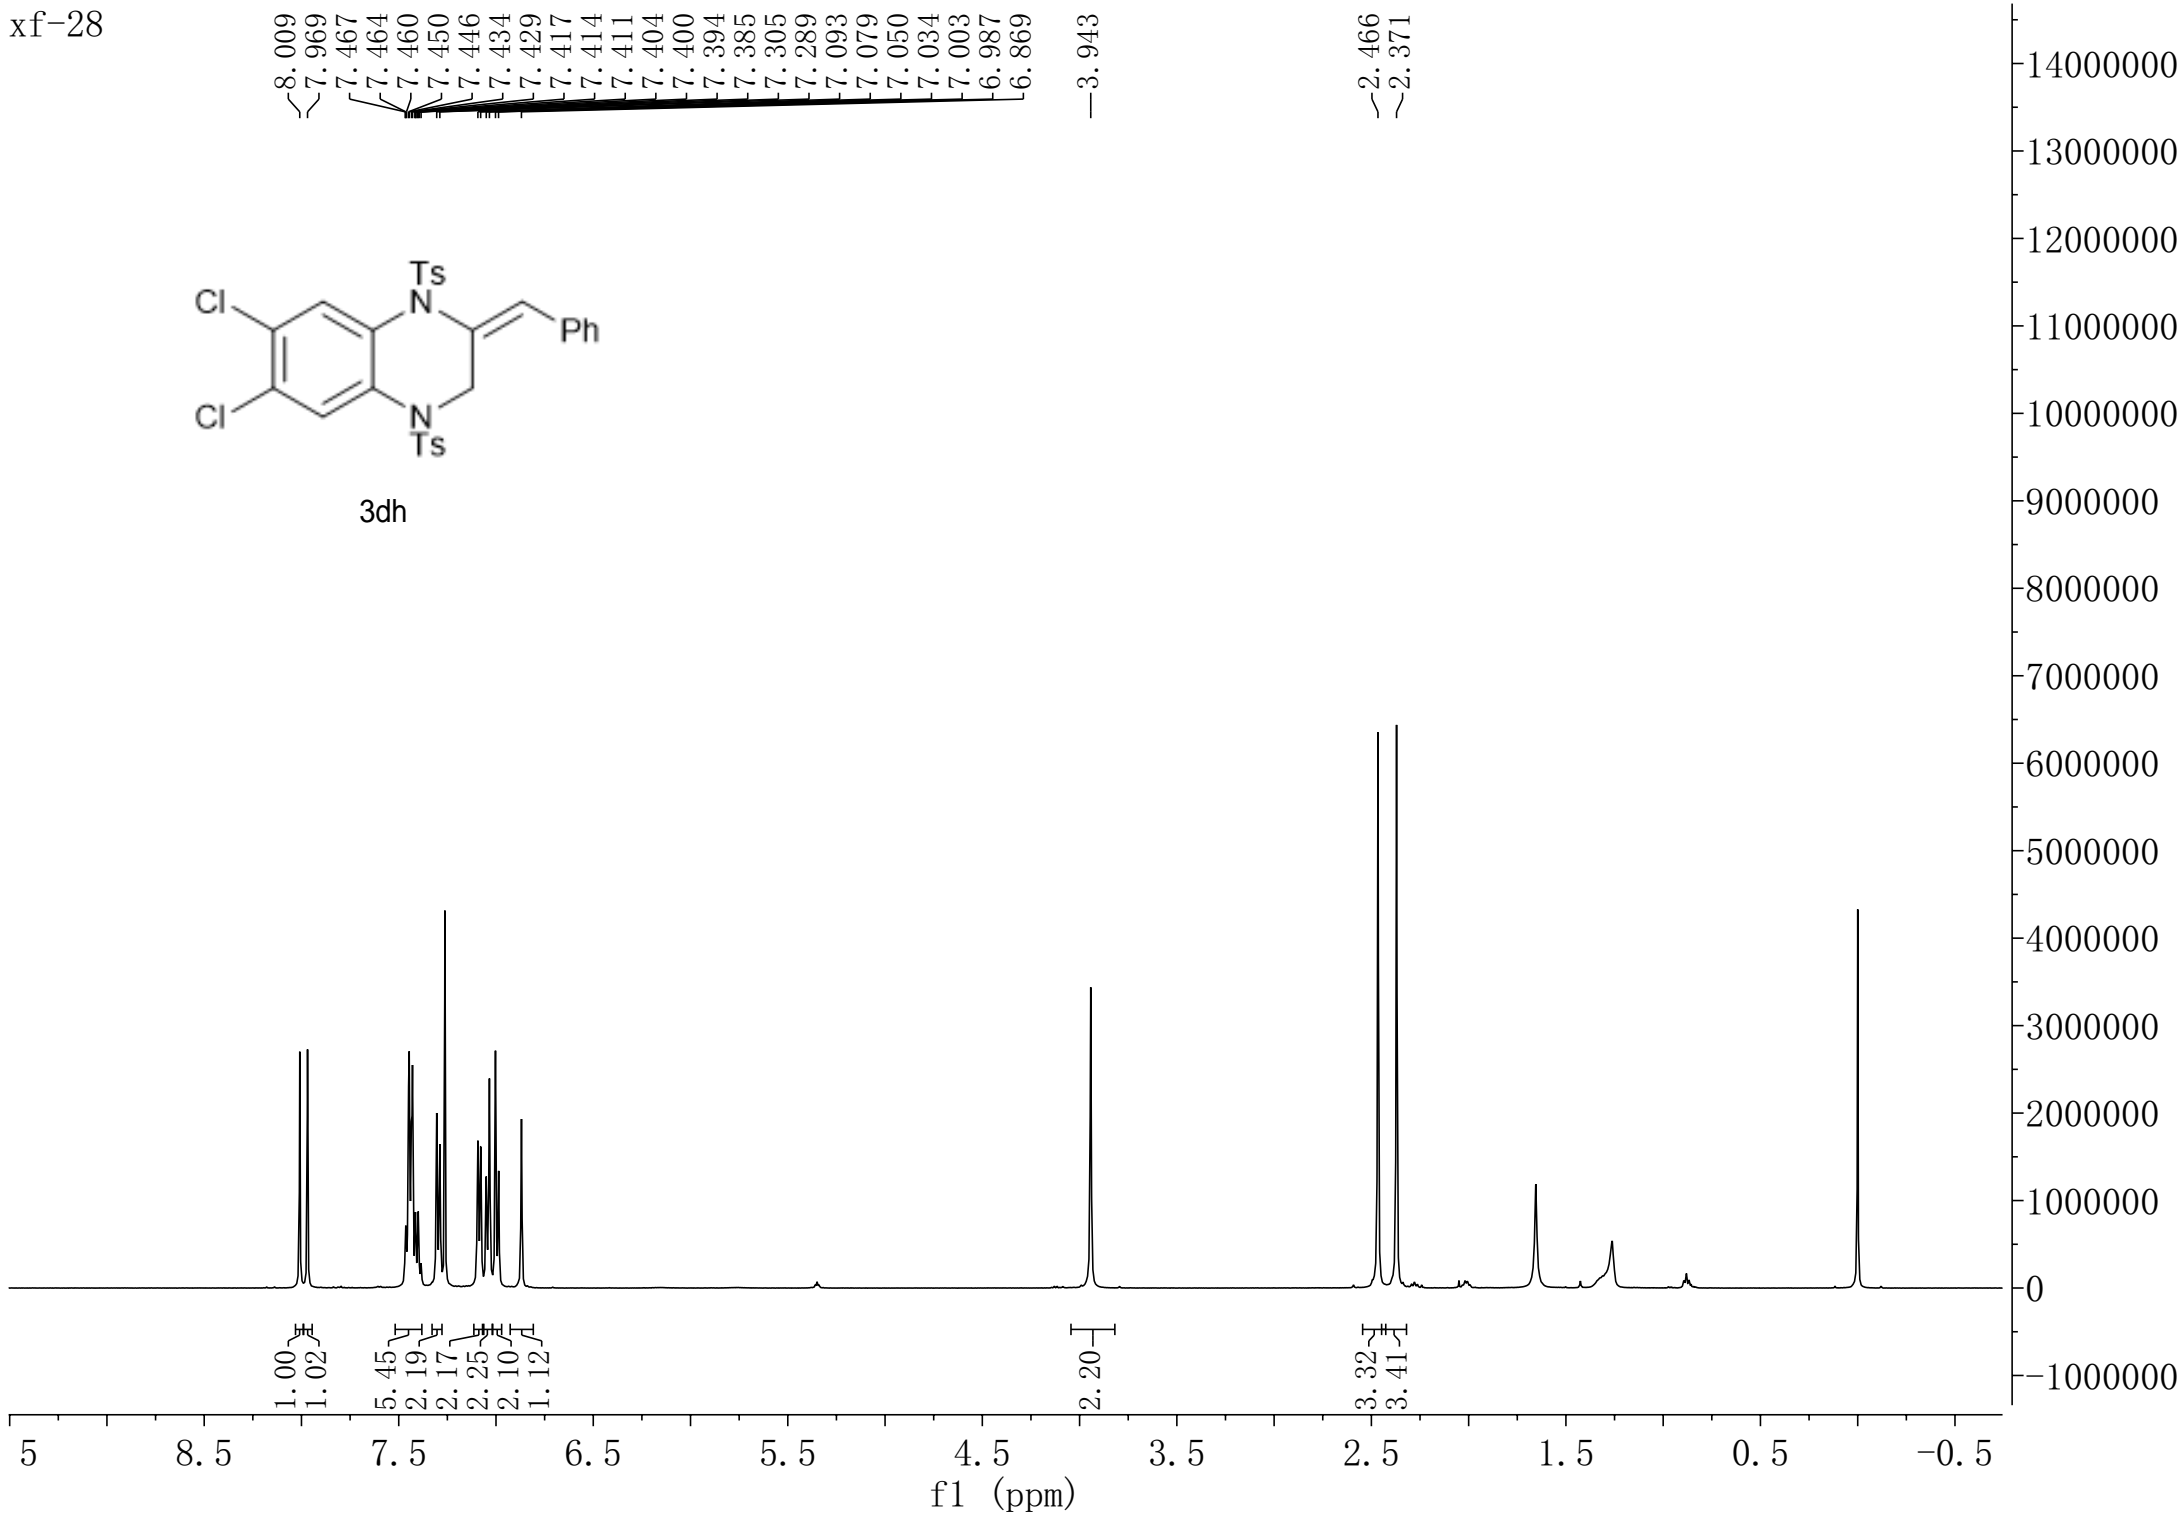

xf-28

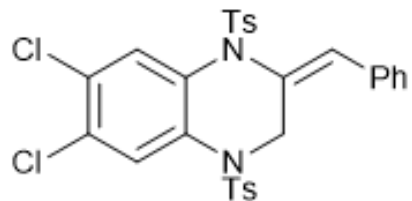

3dh

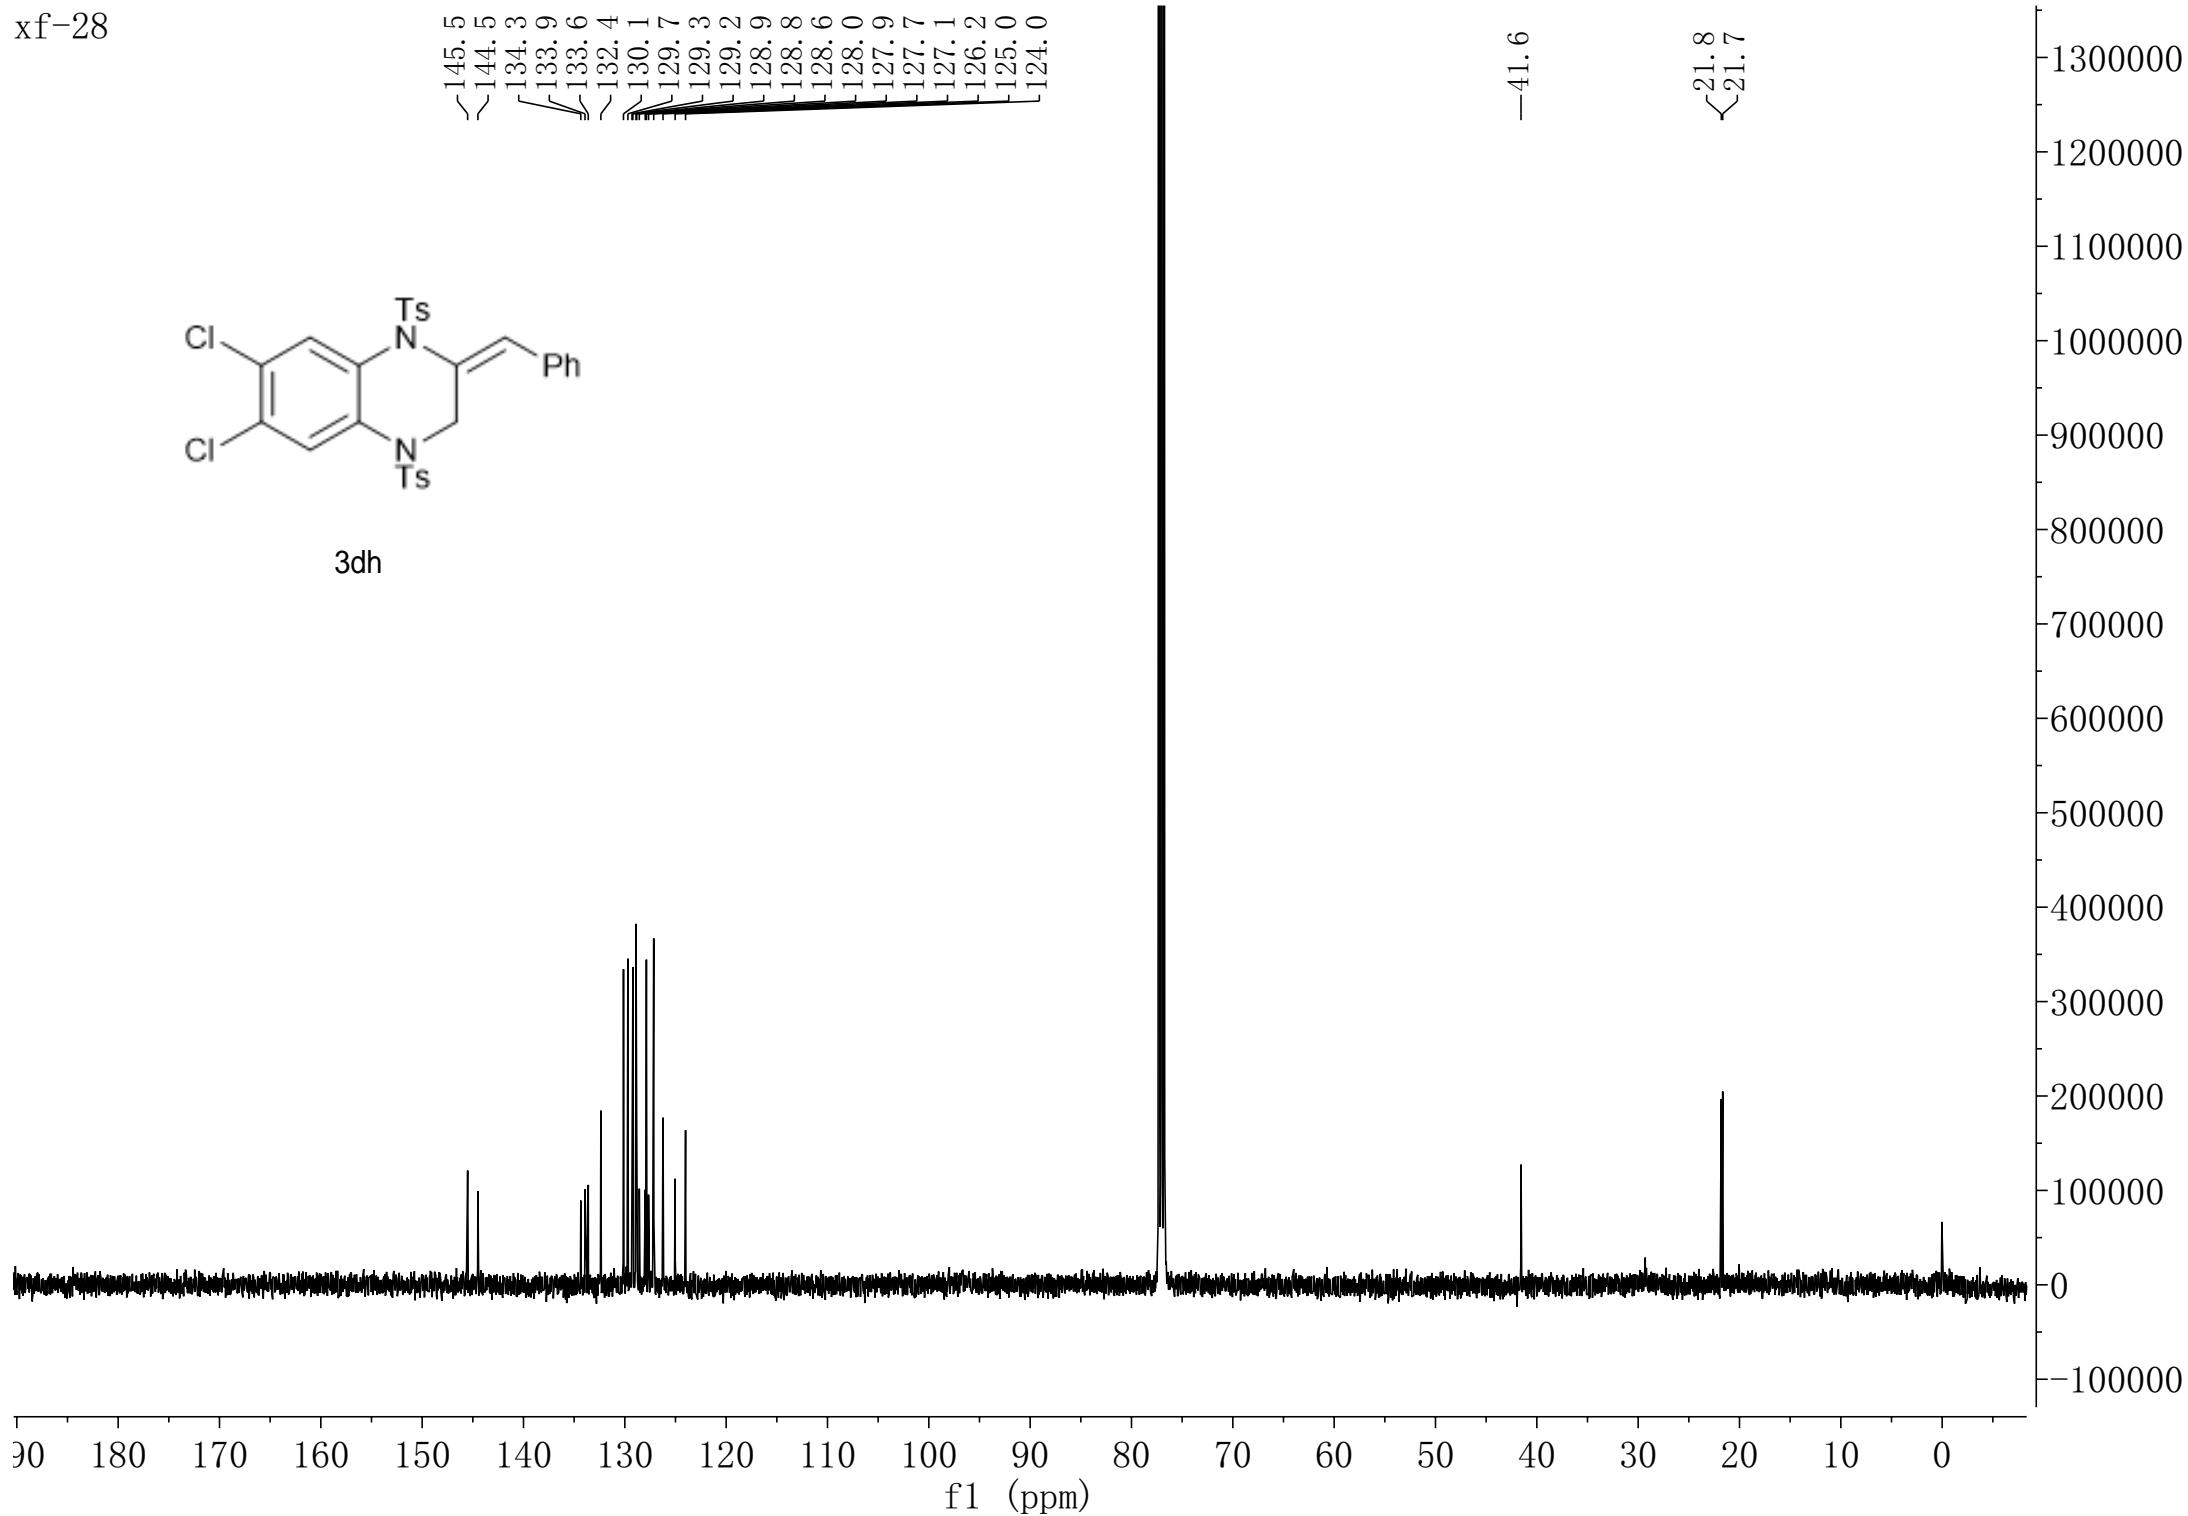

xf-29

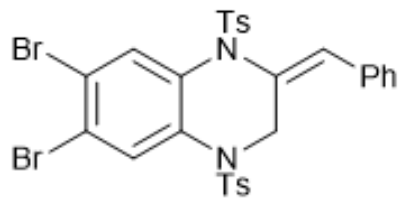

3eh

8.142  
8.112  
7.448  
7.433  
7.412  
7.398  
7.384  
7.307  
7.290  
7.089  
7.074  
7.053  
7.037  
7.009  
6.992  
6.867

3.938

2.467  
2.371

1.00  
1.03  
5.88  
2.29  
2.24  
2.82  
2.44  
1.12

2.23

3.61  
3.64

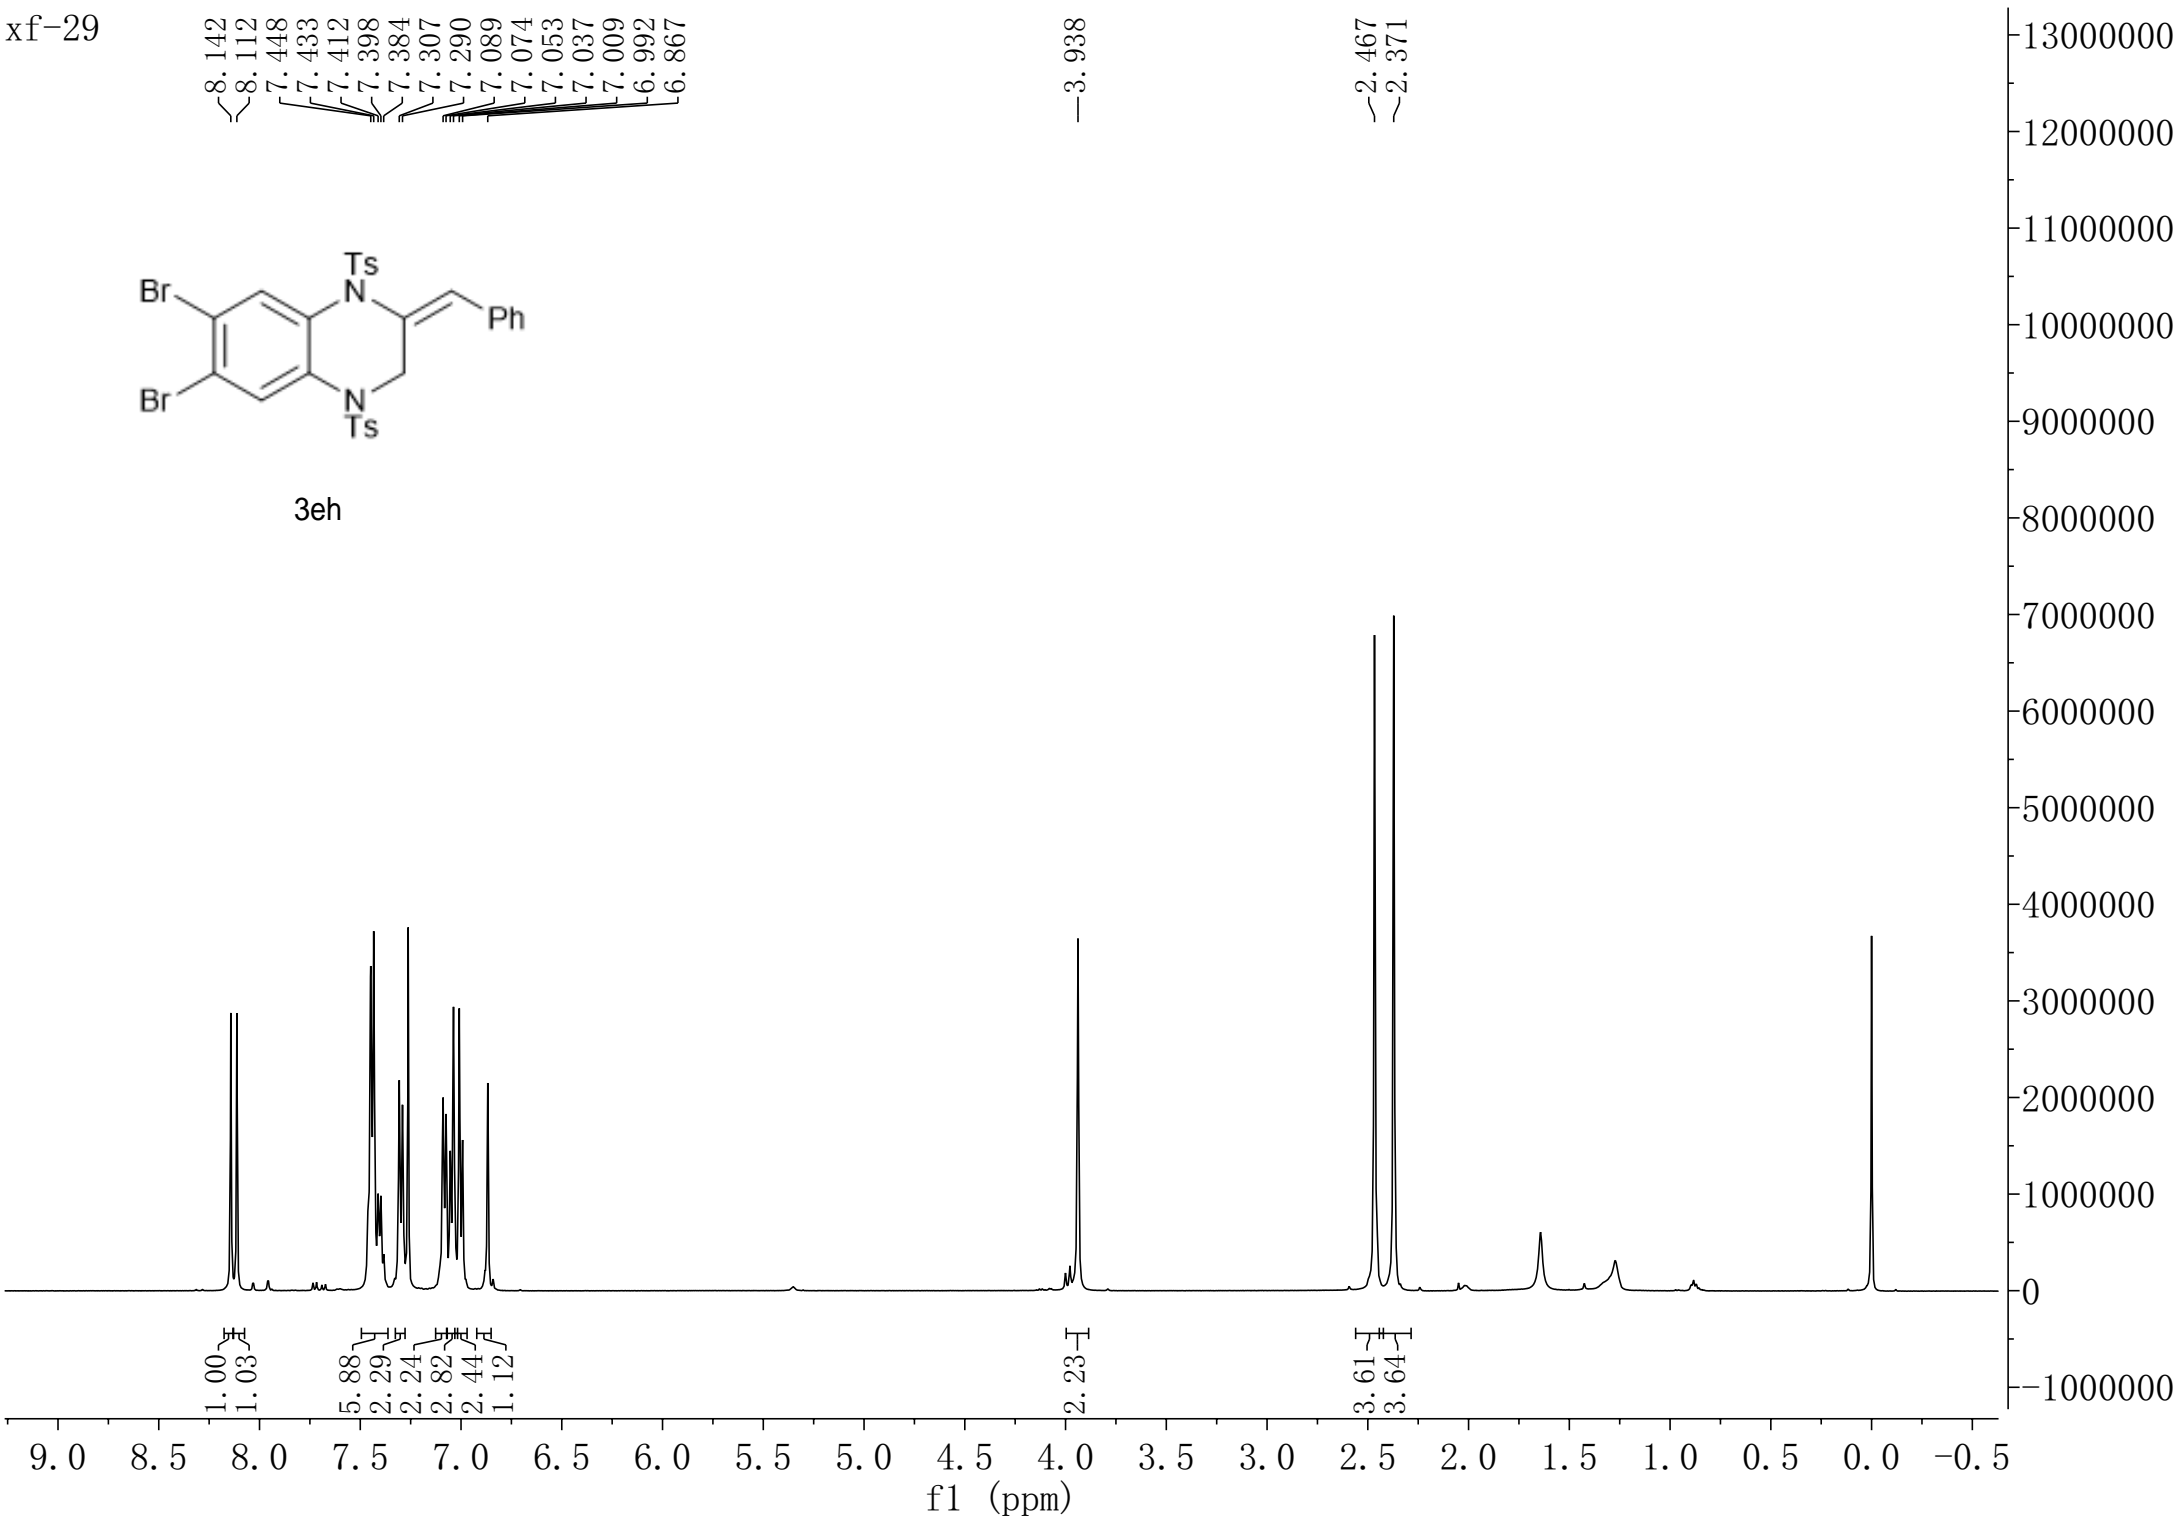

xf-29

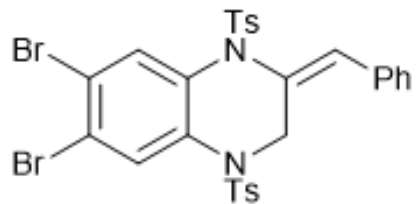

3eh

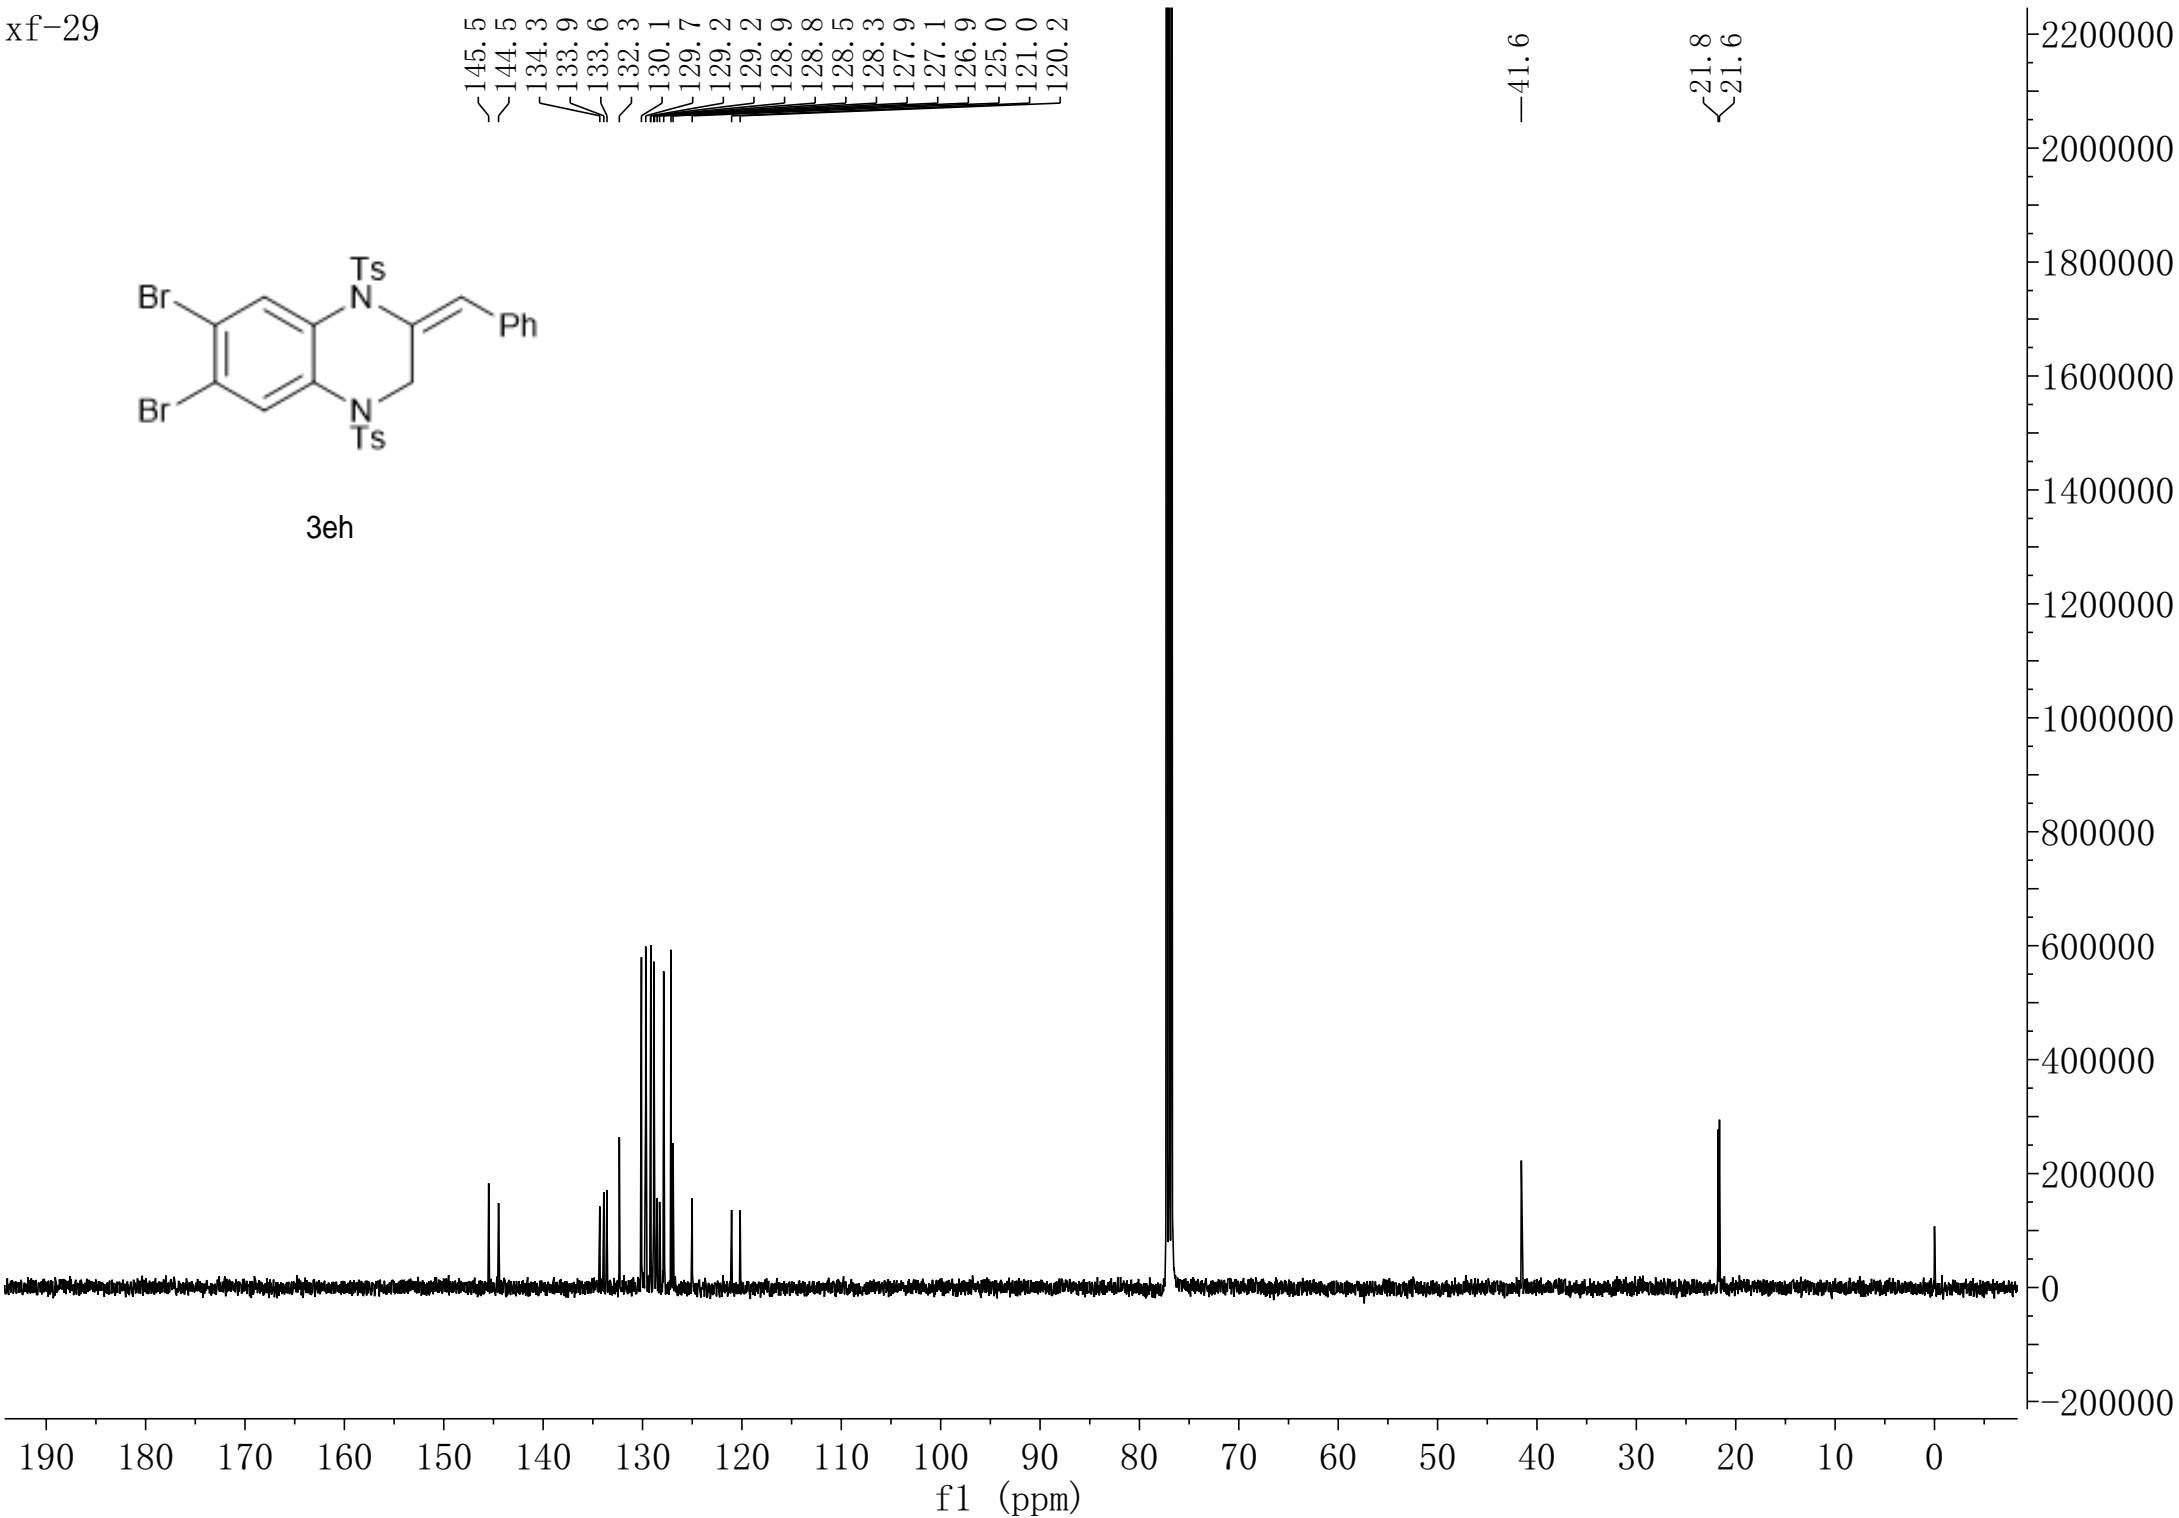

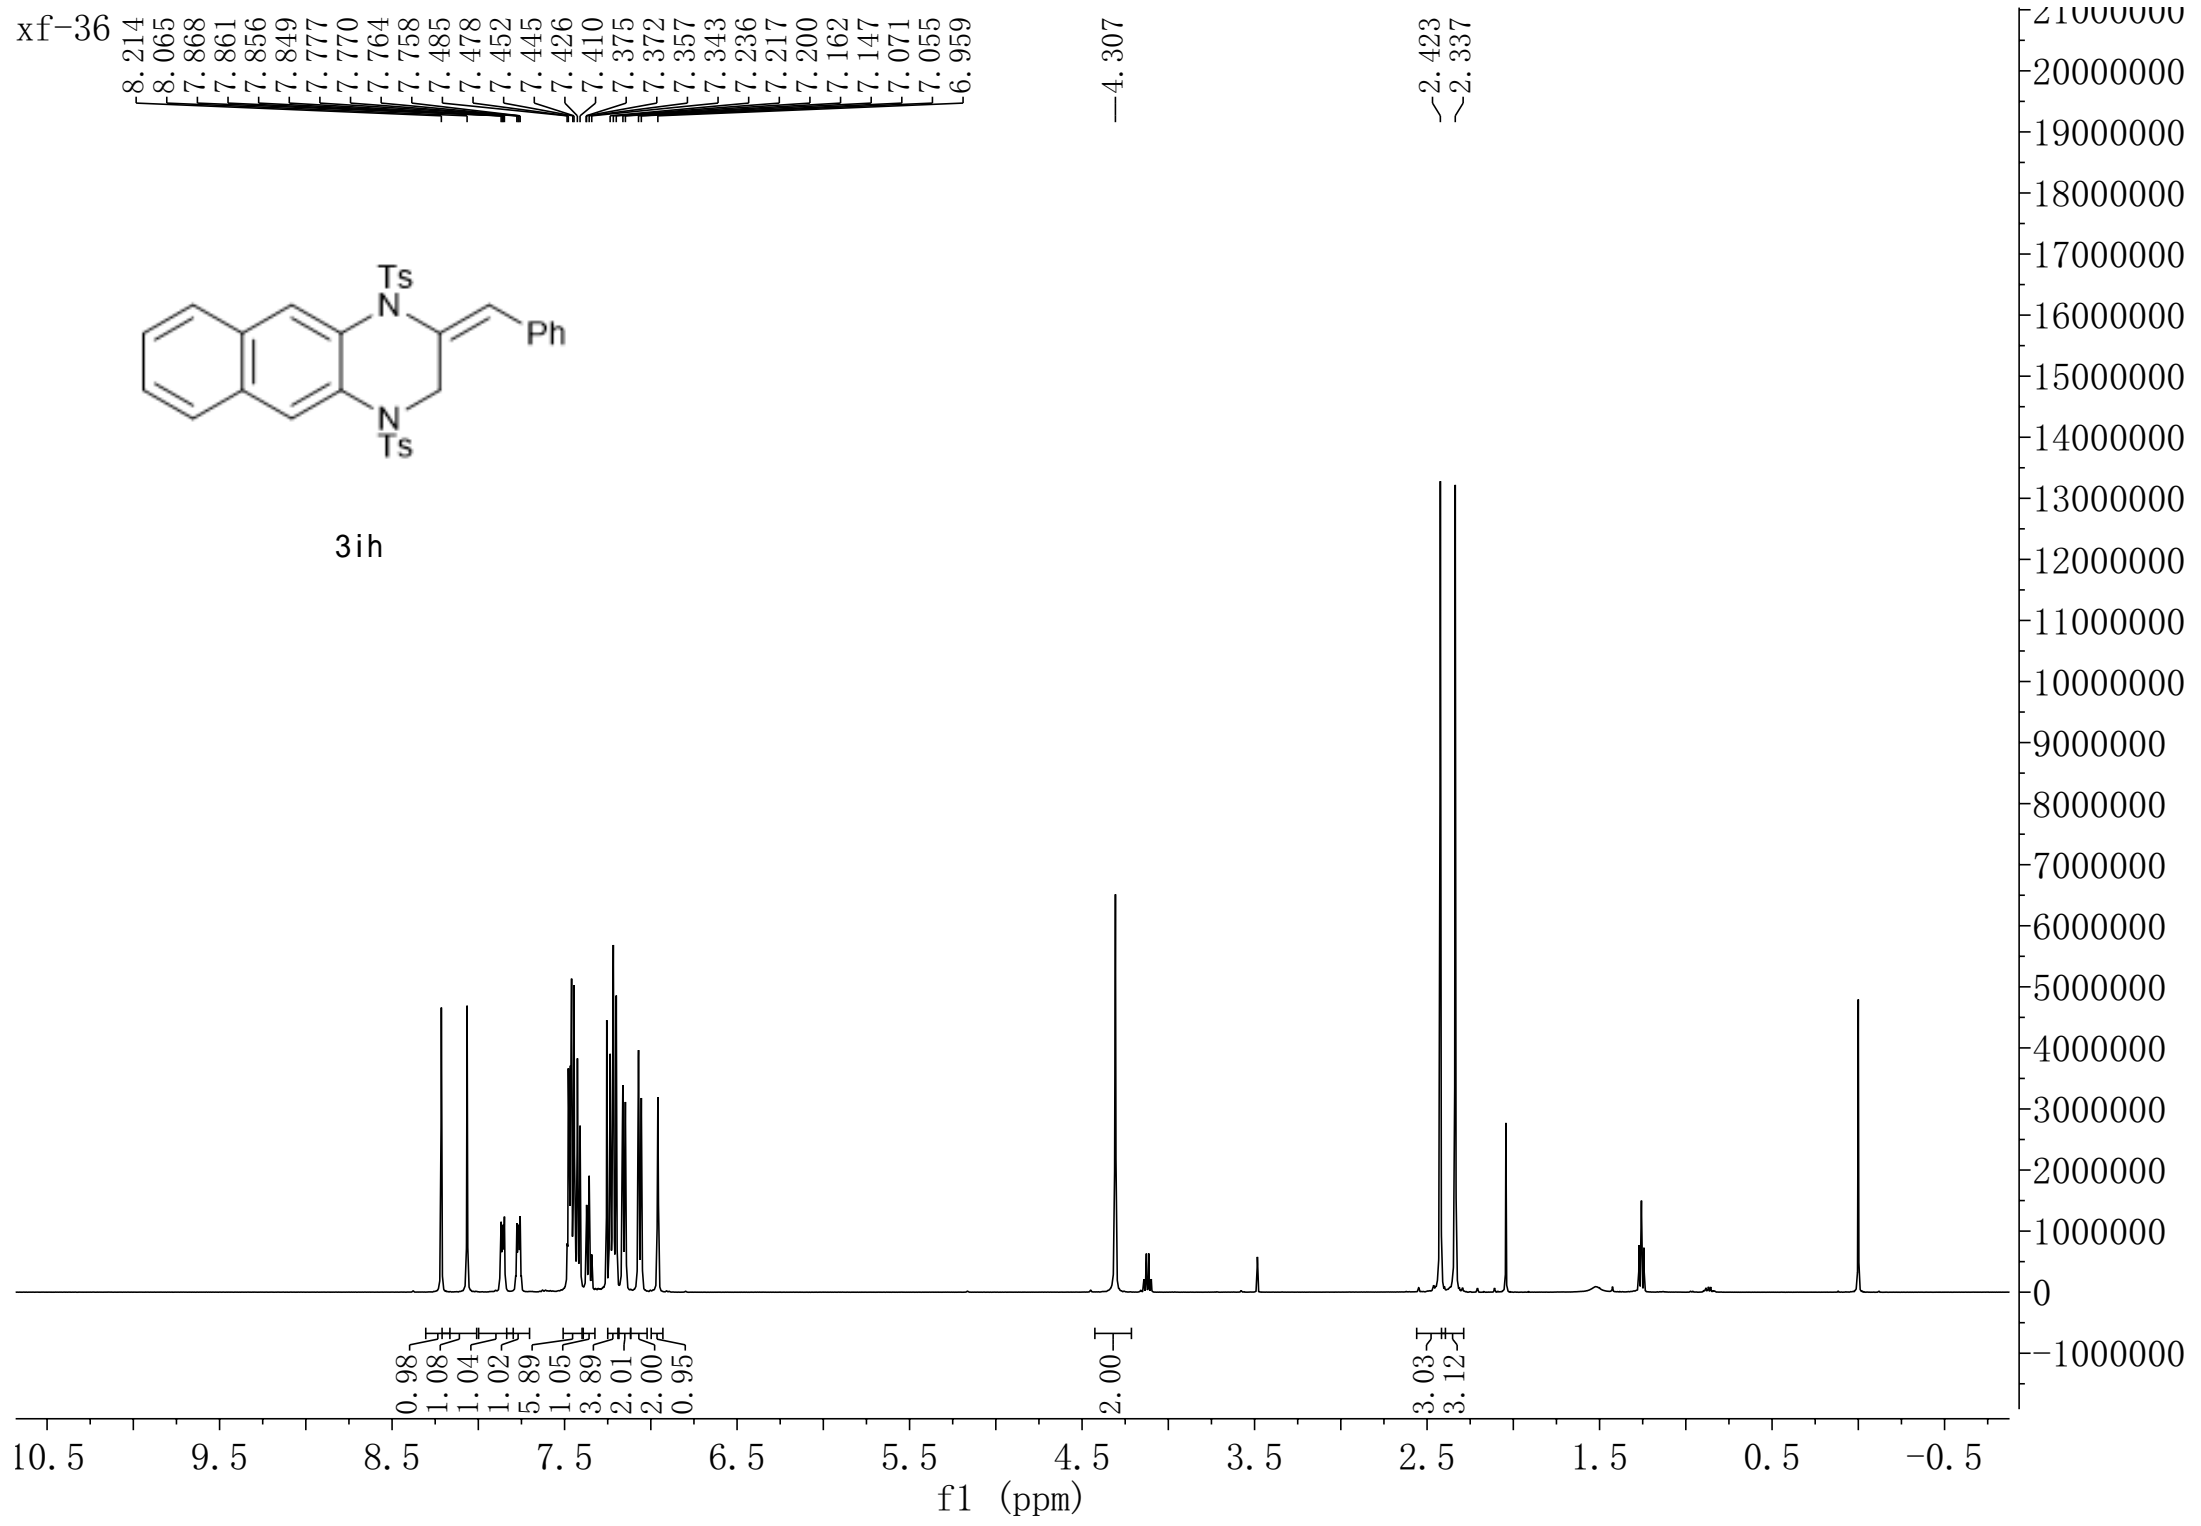

XF-36

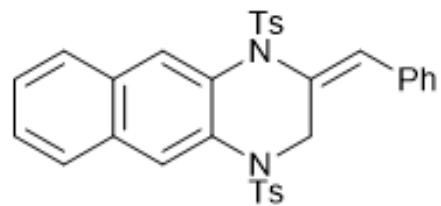

3ih

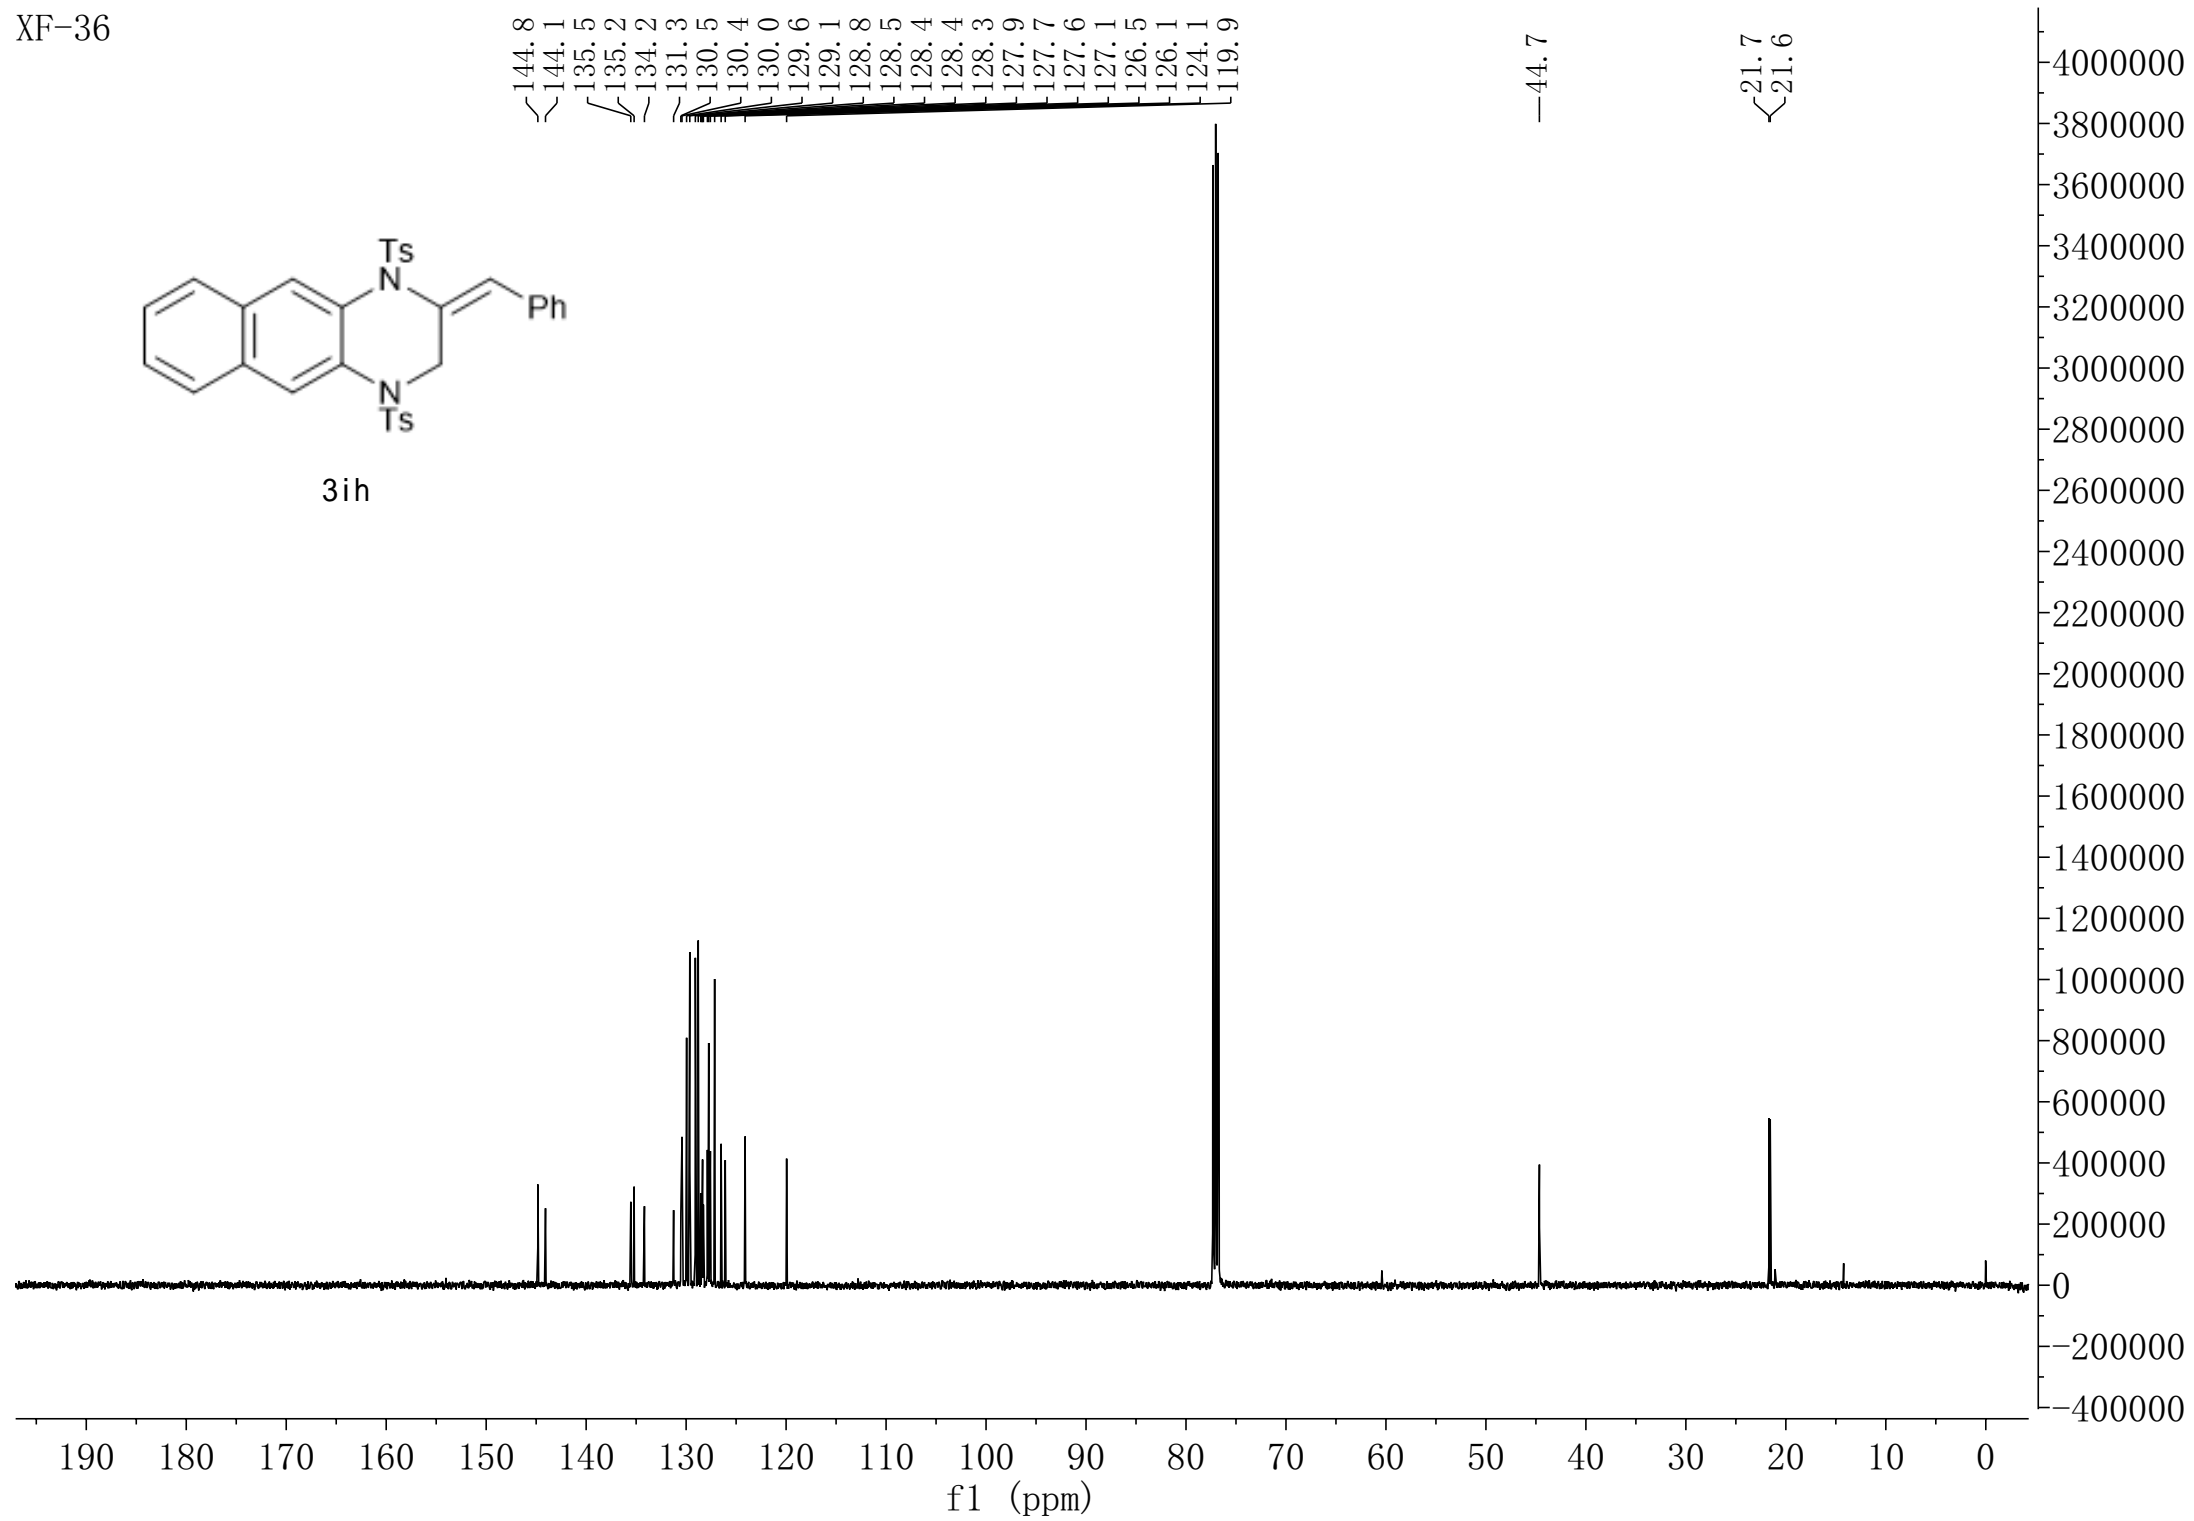



xf-41

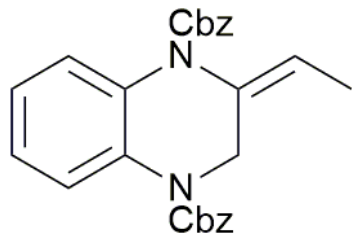

3ja

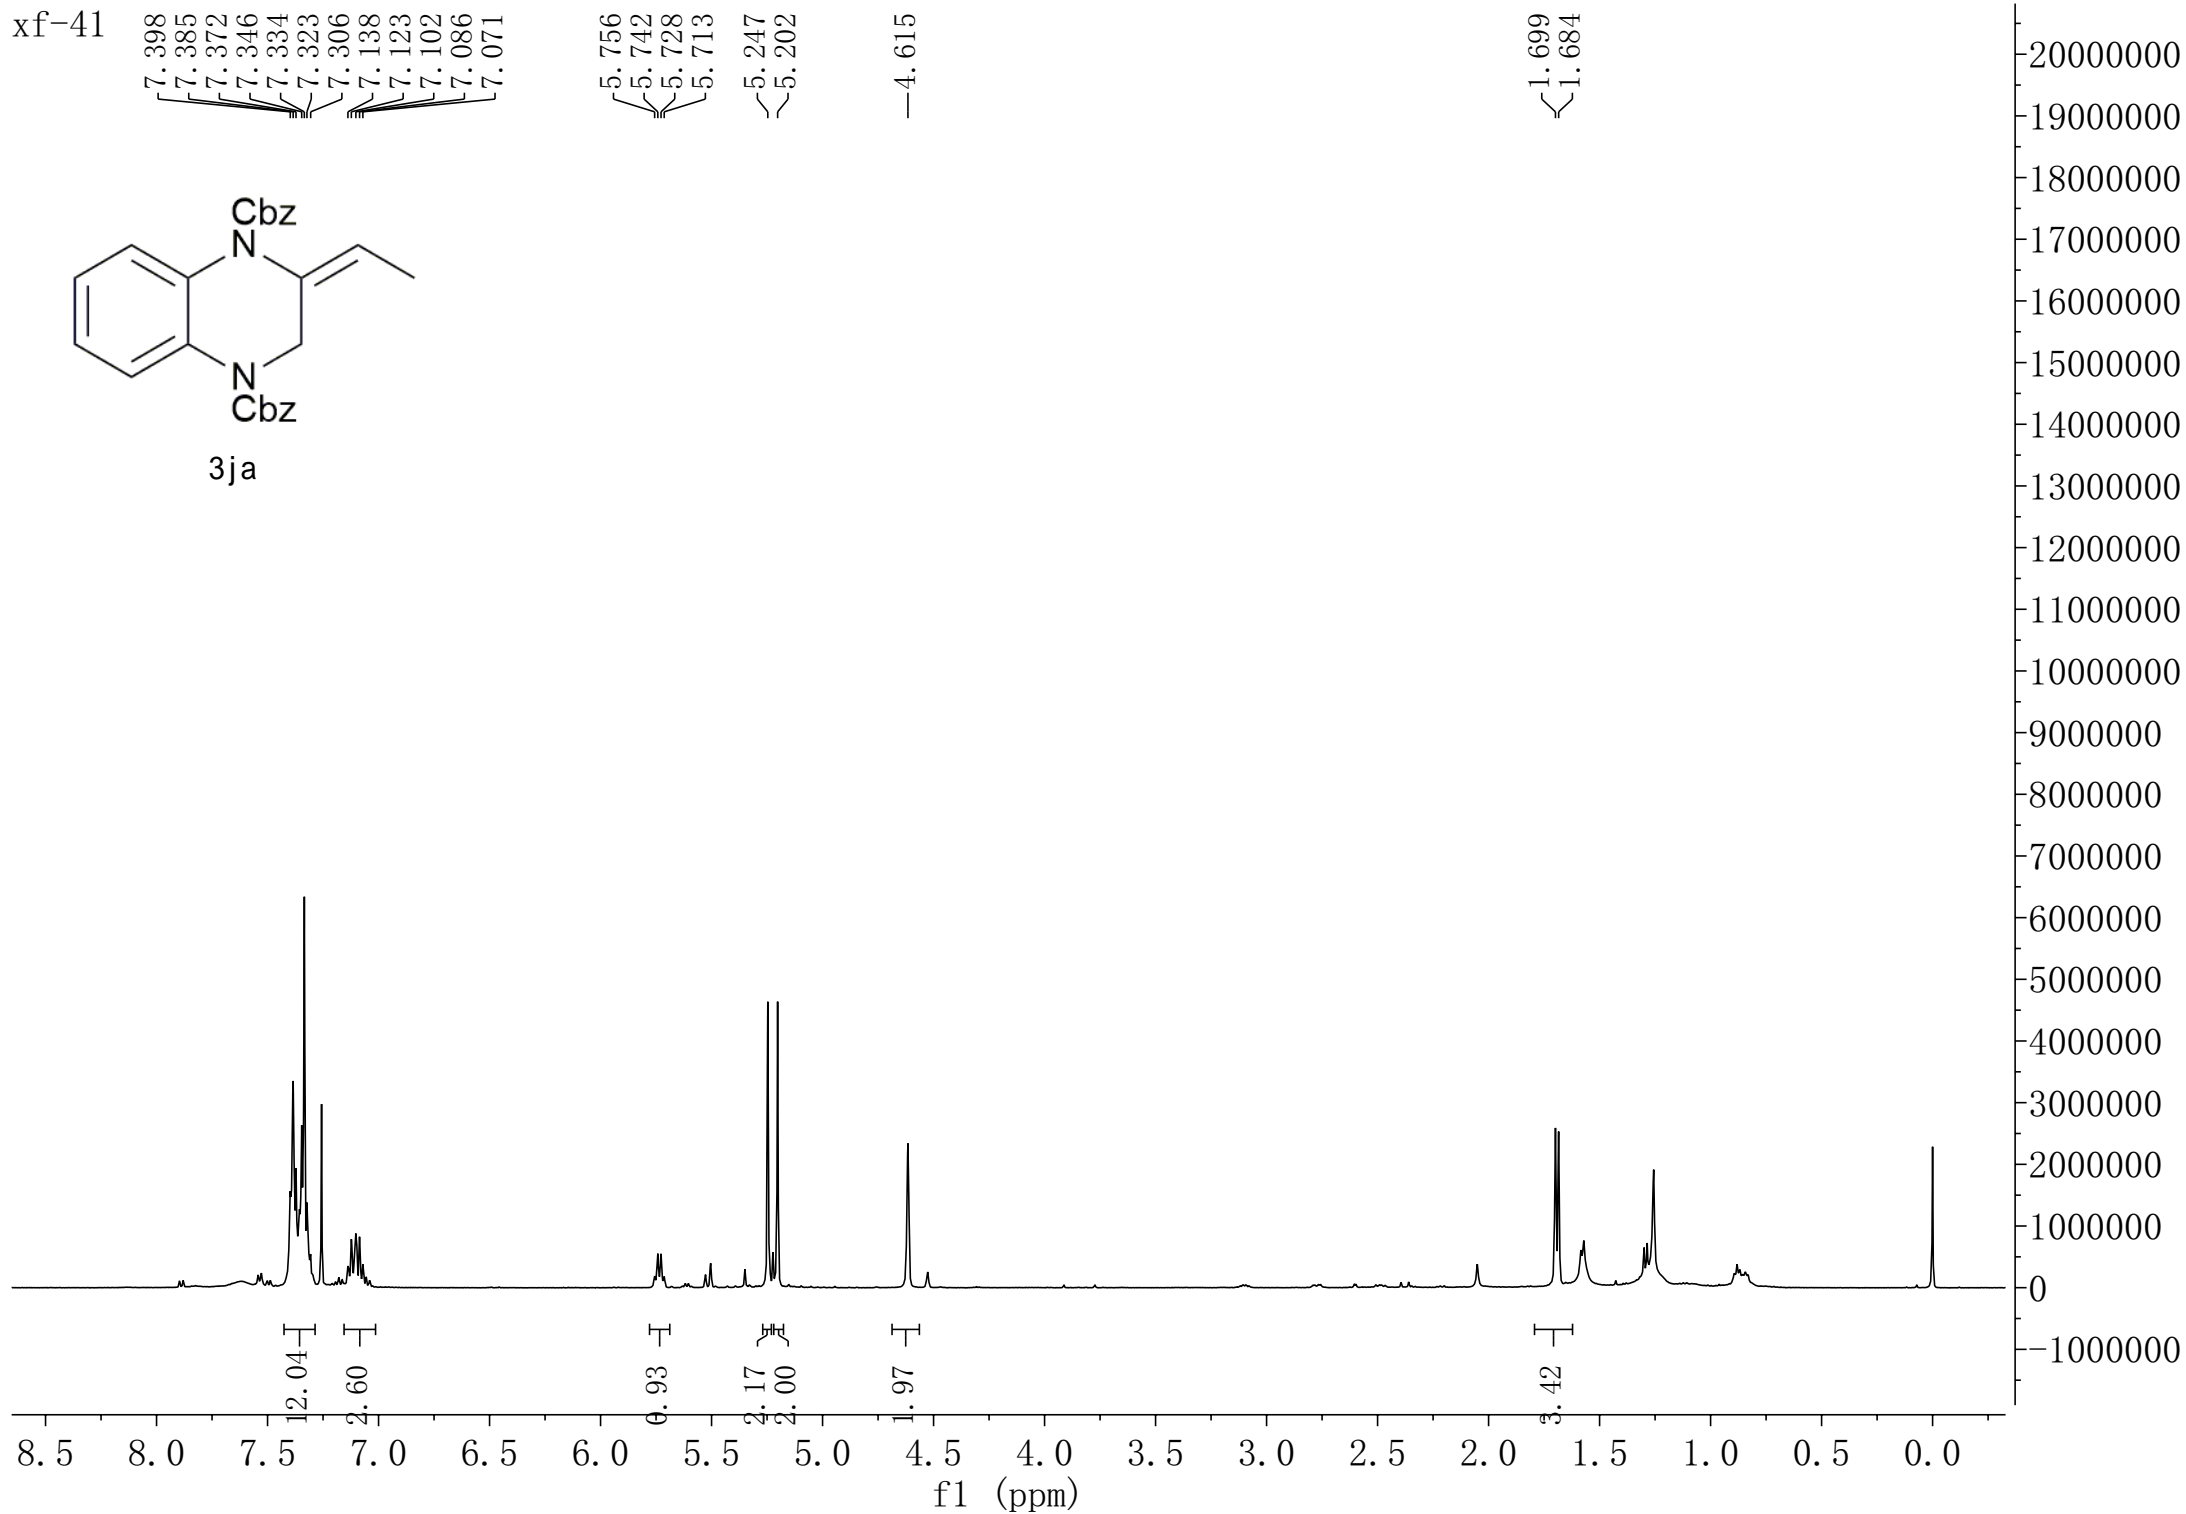

xf-41

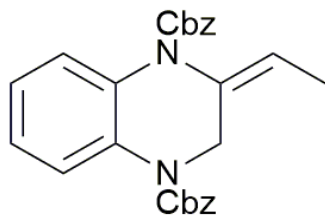

3ja

154.0  
153.5  
136.1  
135.9  
132.9  
128.6  
128.5  
128.3  
128.2  
128.1  
128.0  
127.8  
125.4  
124.7  
124.5

68.0  
67.8

48.1

12.9

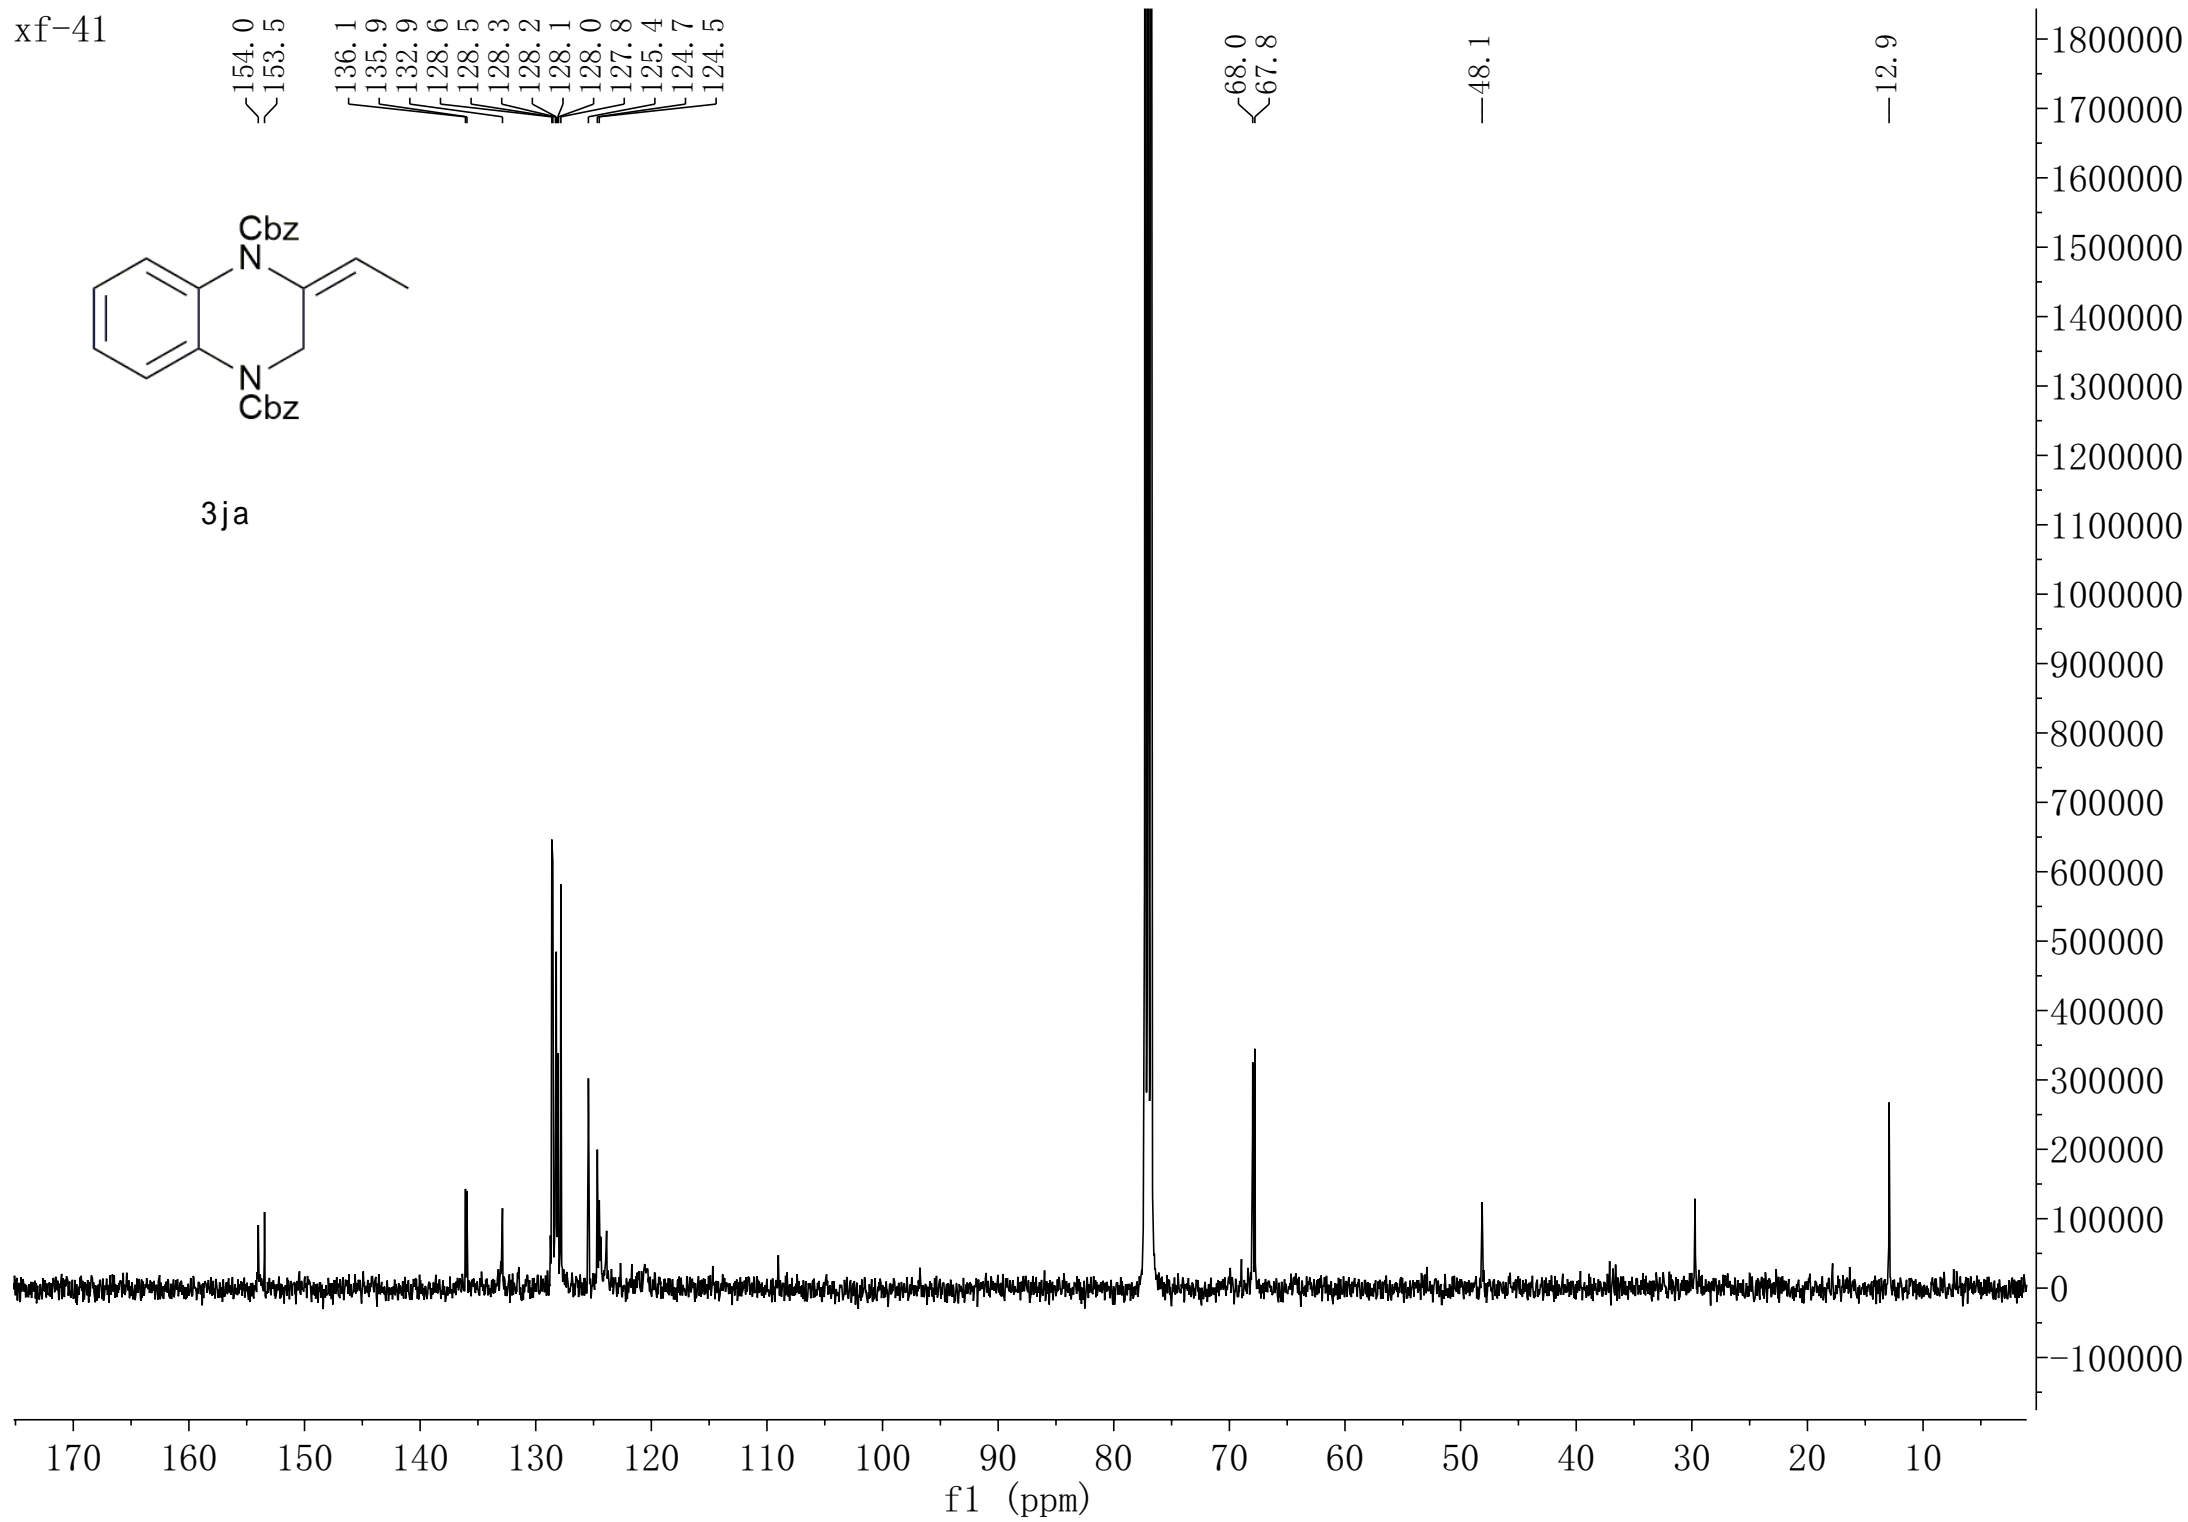

7.476  
7.460  
7.363  
7.356  
7.351  
7.338  
7.325  
7.308  
7.260  
7.208  
7.196  
7.138  
7.131  
6.773

5.256  
5.237  
4.873

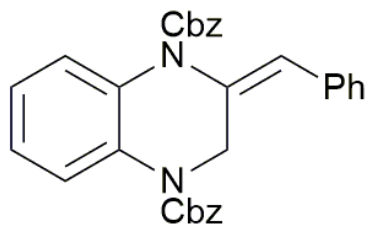

3jh

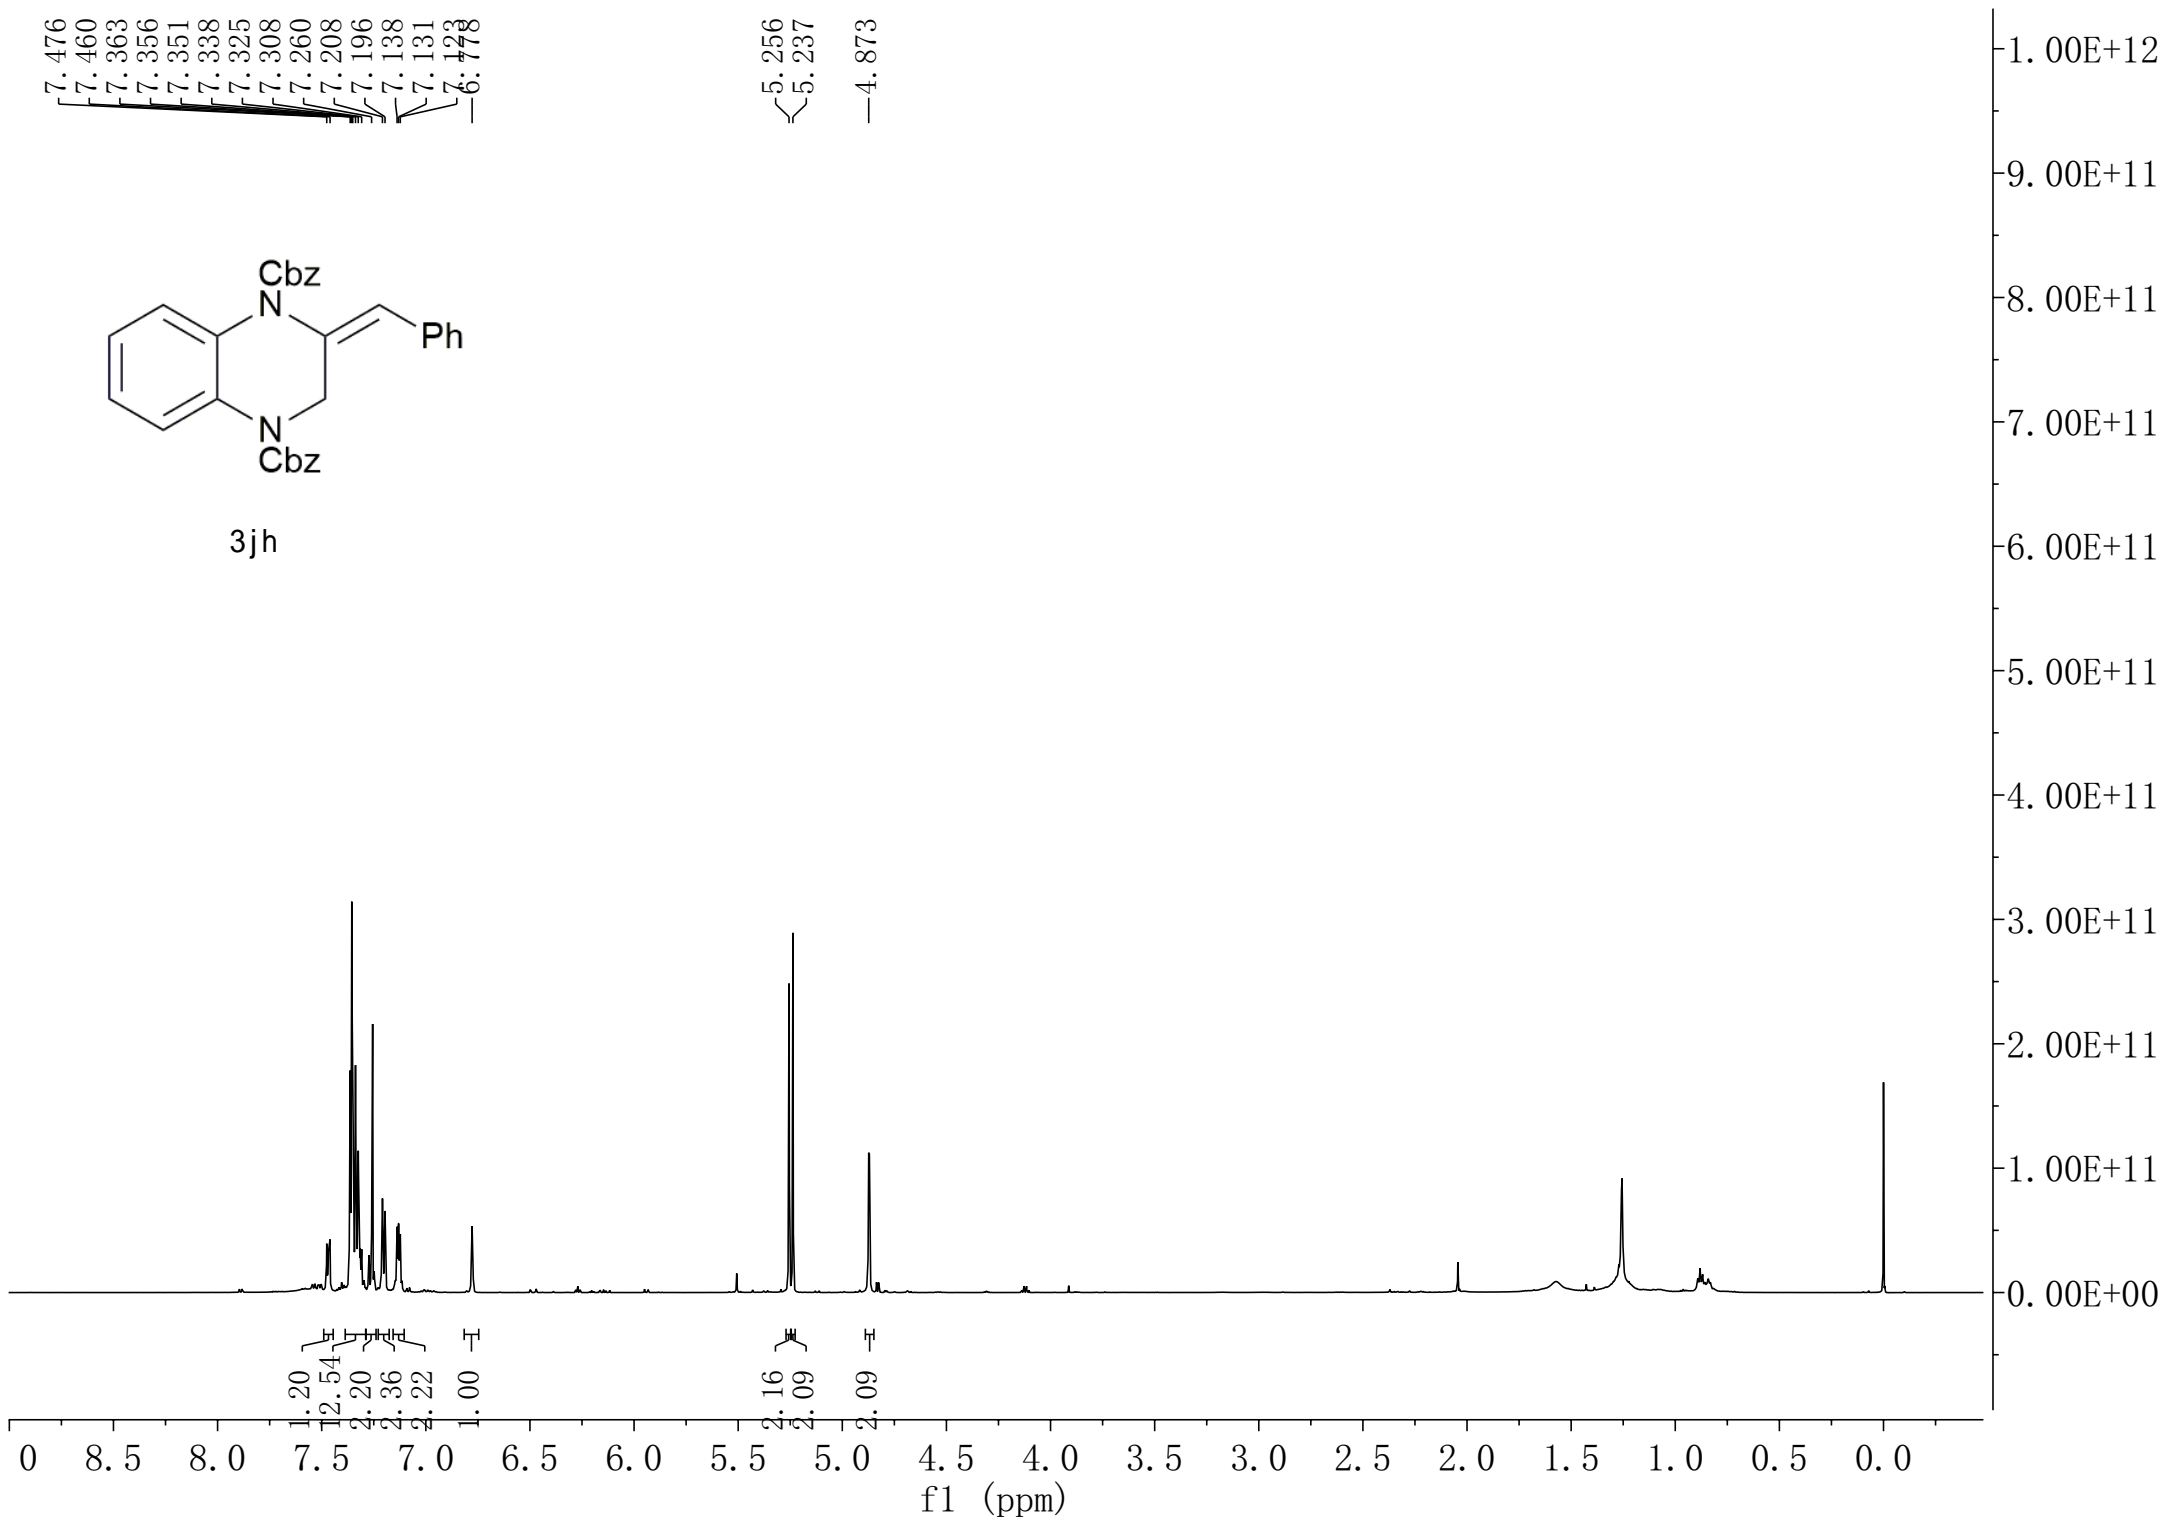

153.4  
135.9  
134.9  
132.7  
128.7  
128.6  
128.6  
128.5  
128.3  
128.2  
128.1  
127.9  
127.6  
125.6  
124.7

68.0

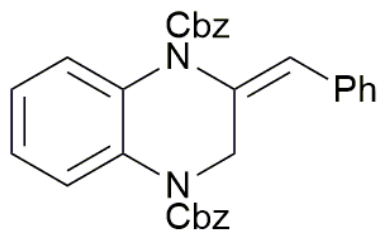

3jh

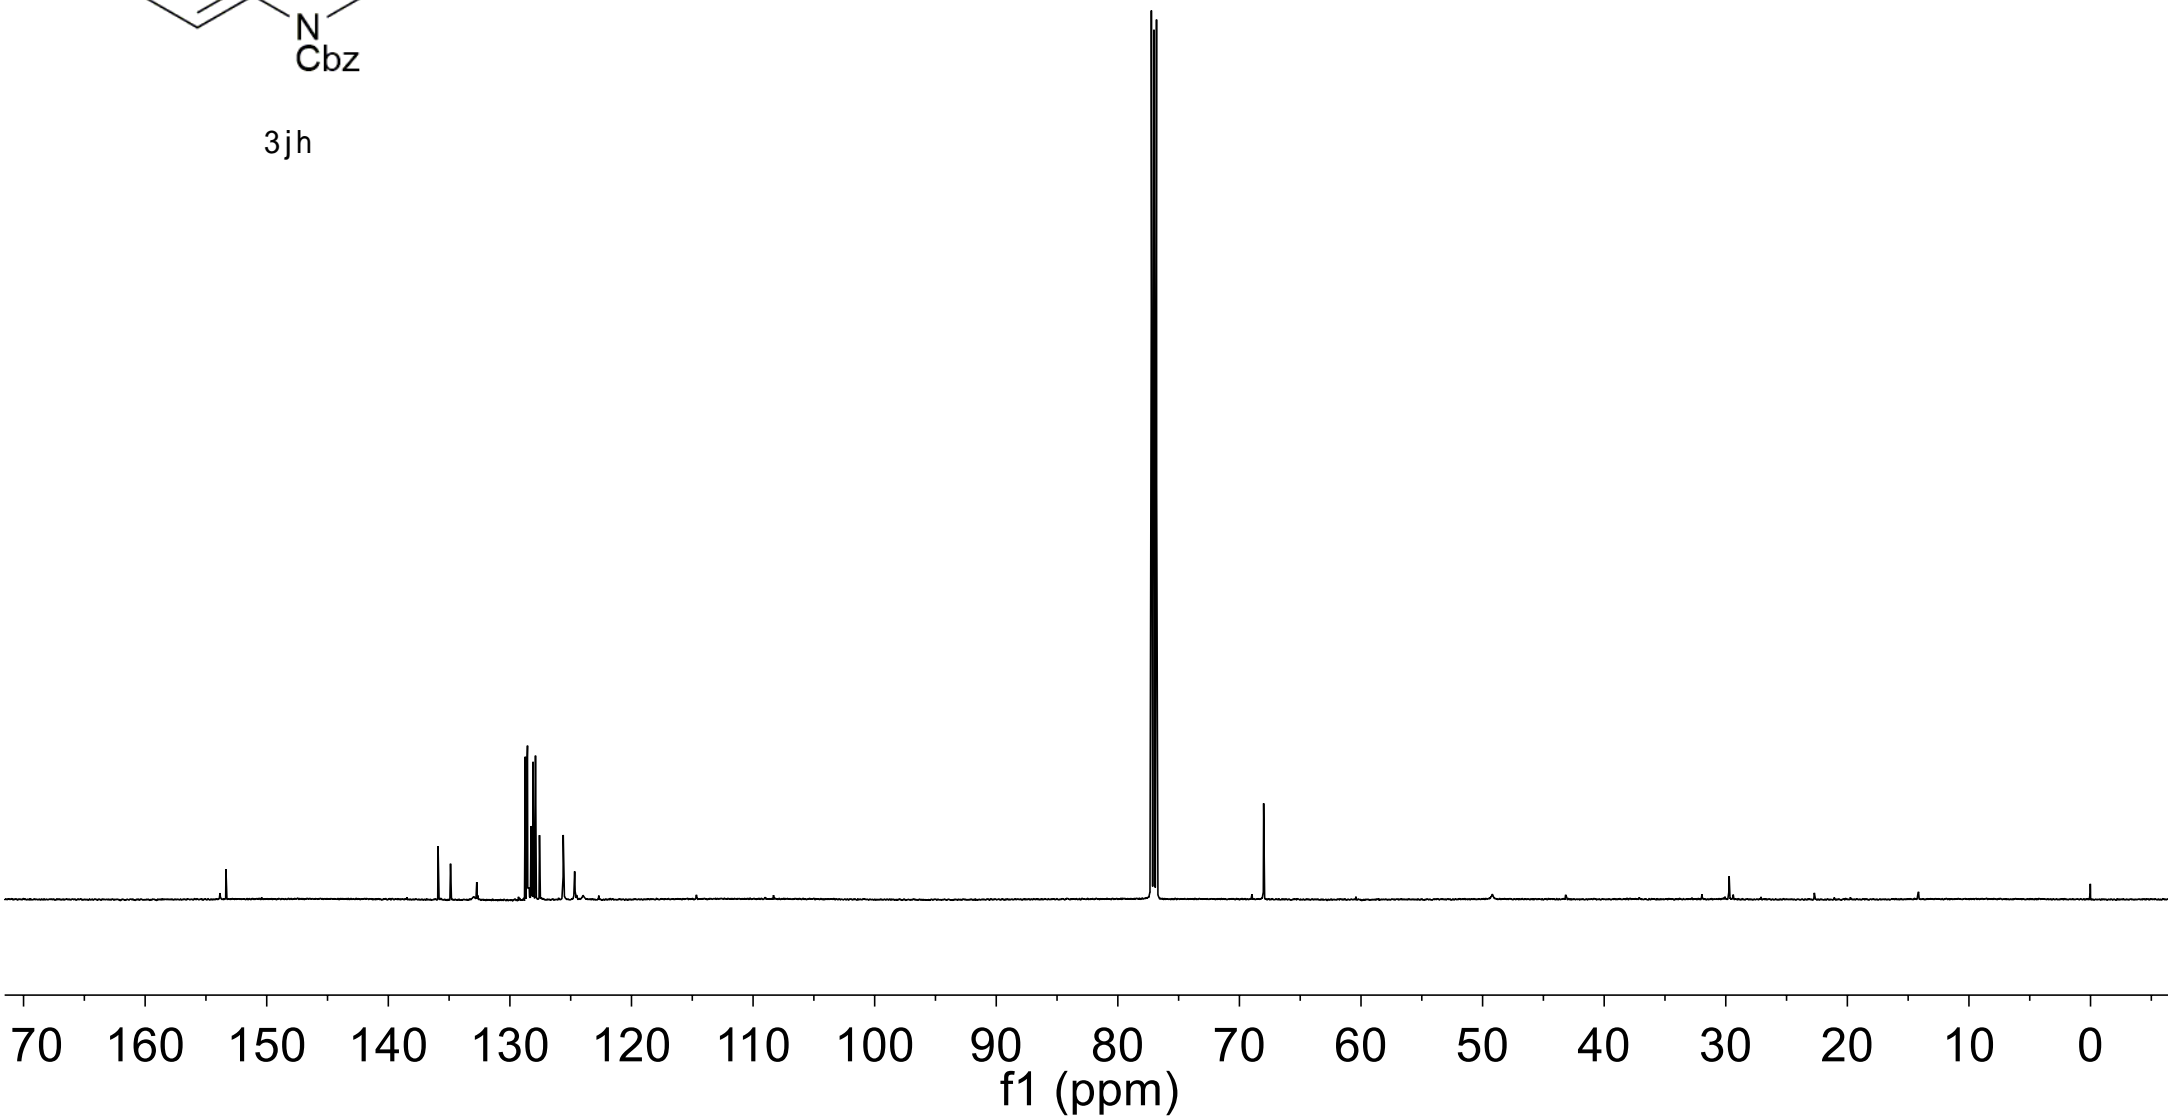

xf-B1

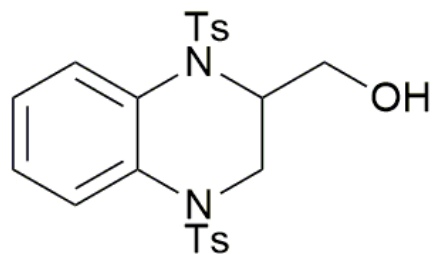

4

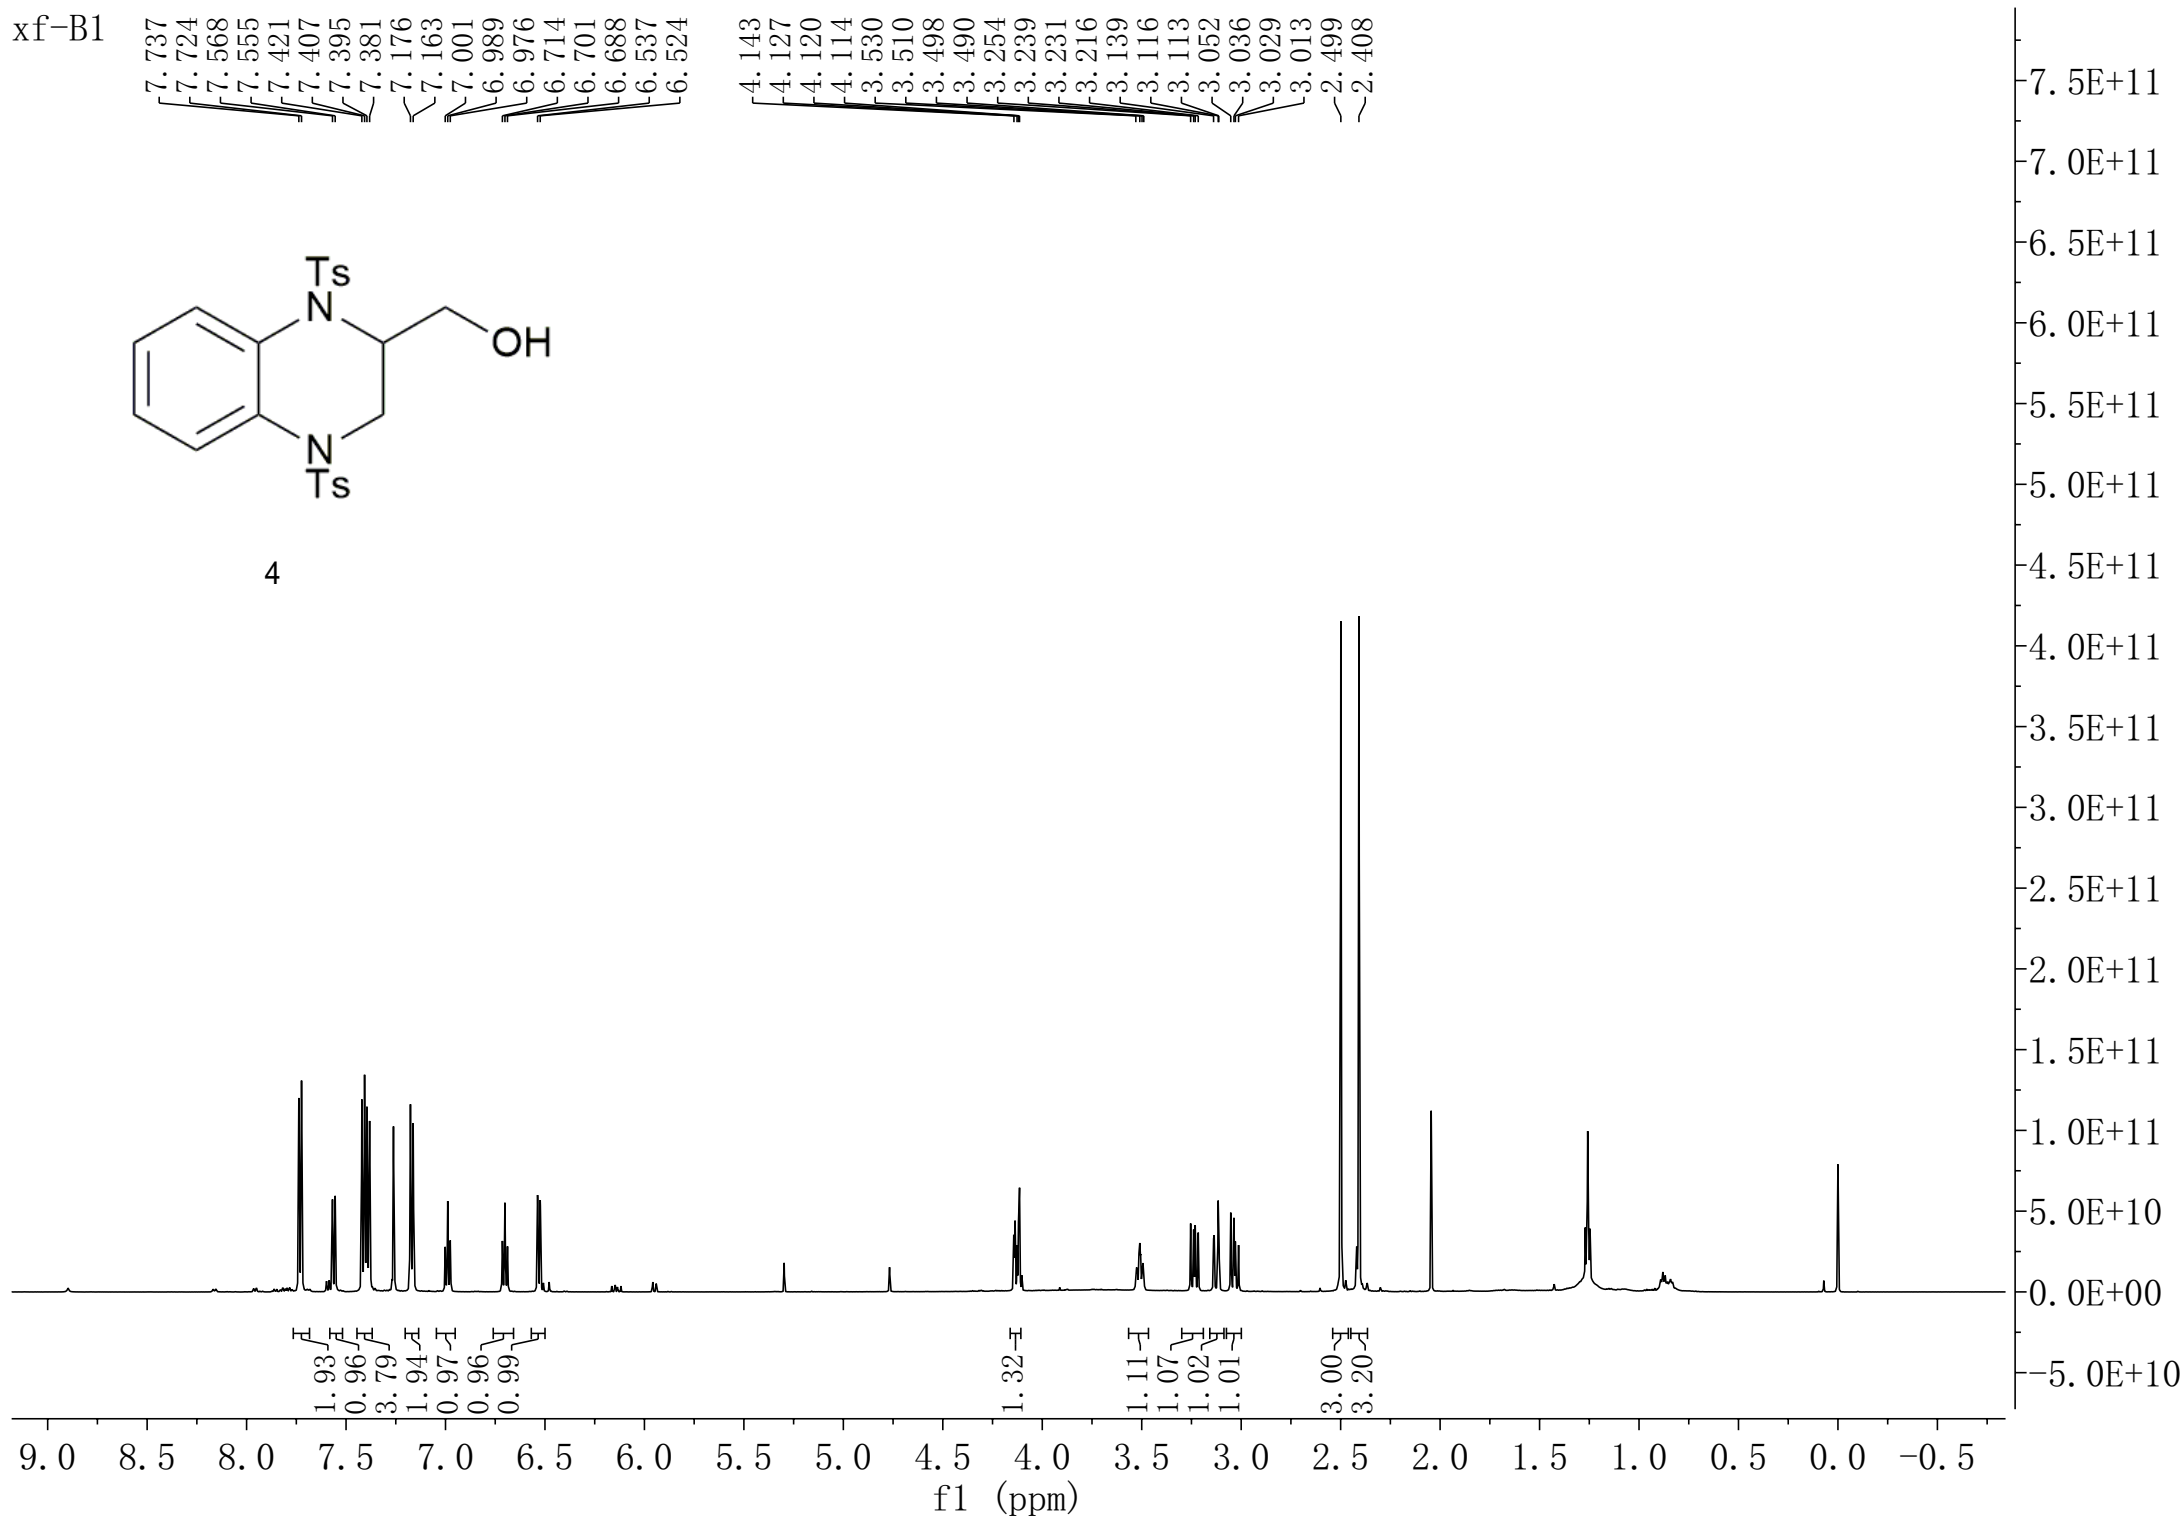

xf-B1

145.5  
144.0  
136.4  
136.2  
135.9  
130.2  
129.8  
127.9  
127.1  
126.6  
124.7  
121.7  
117.9  
115.2

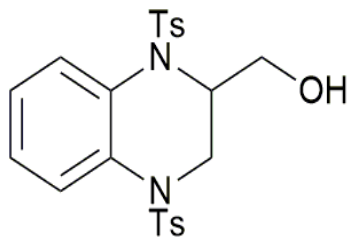

4

58.9

48.3

43.2

21.8  
21.6

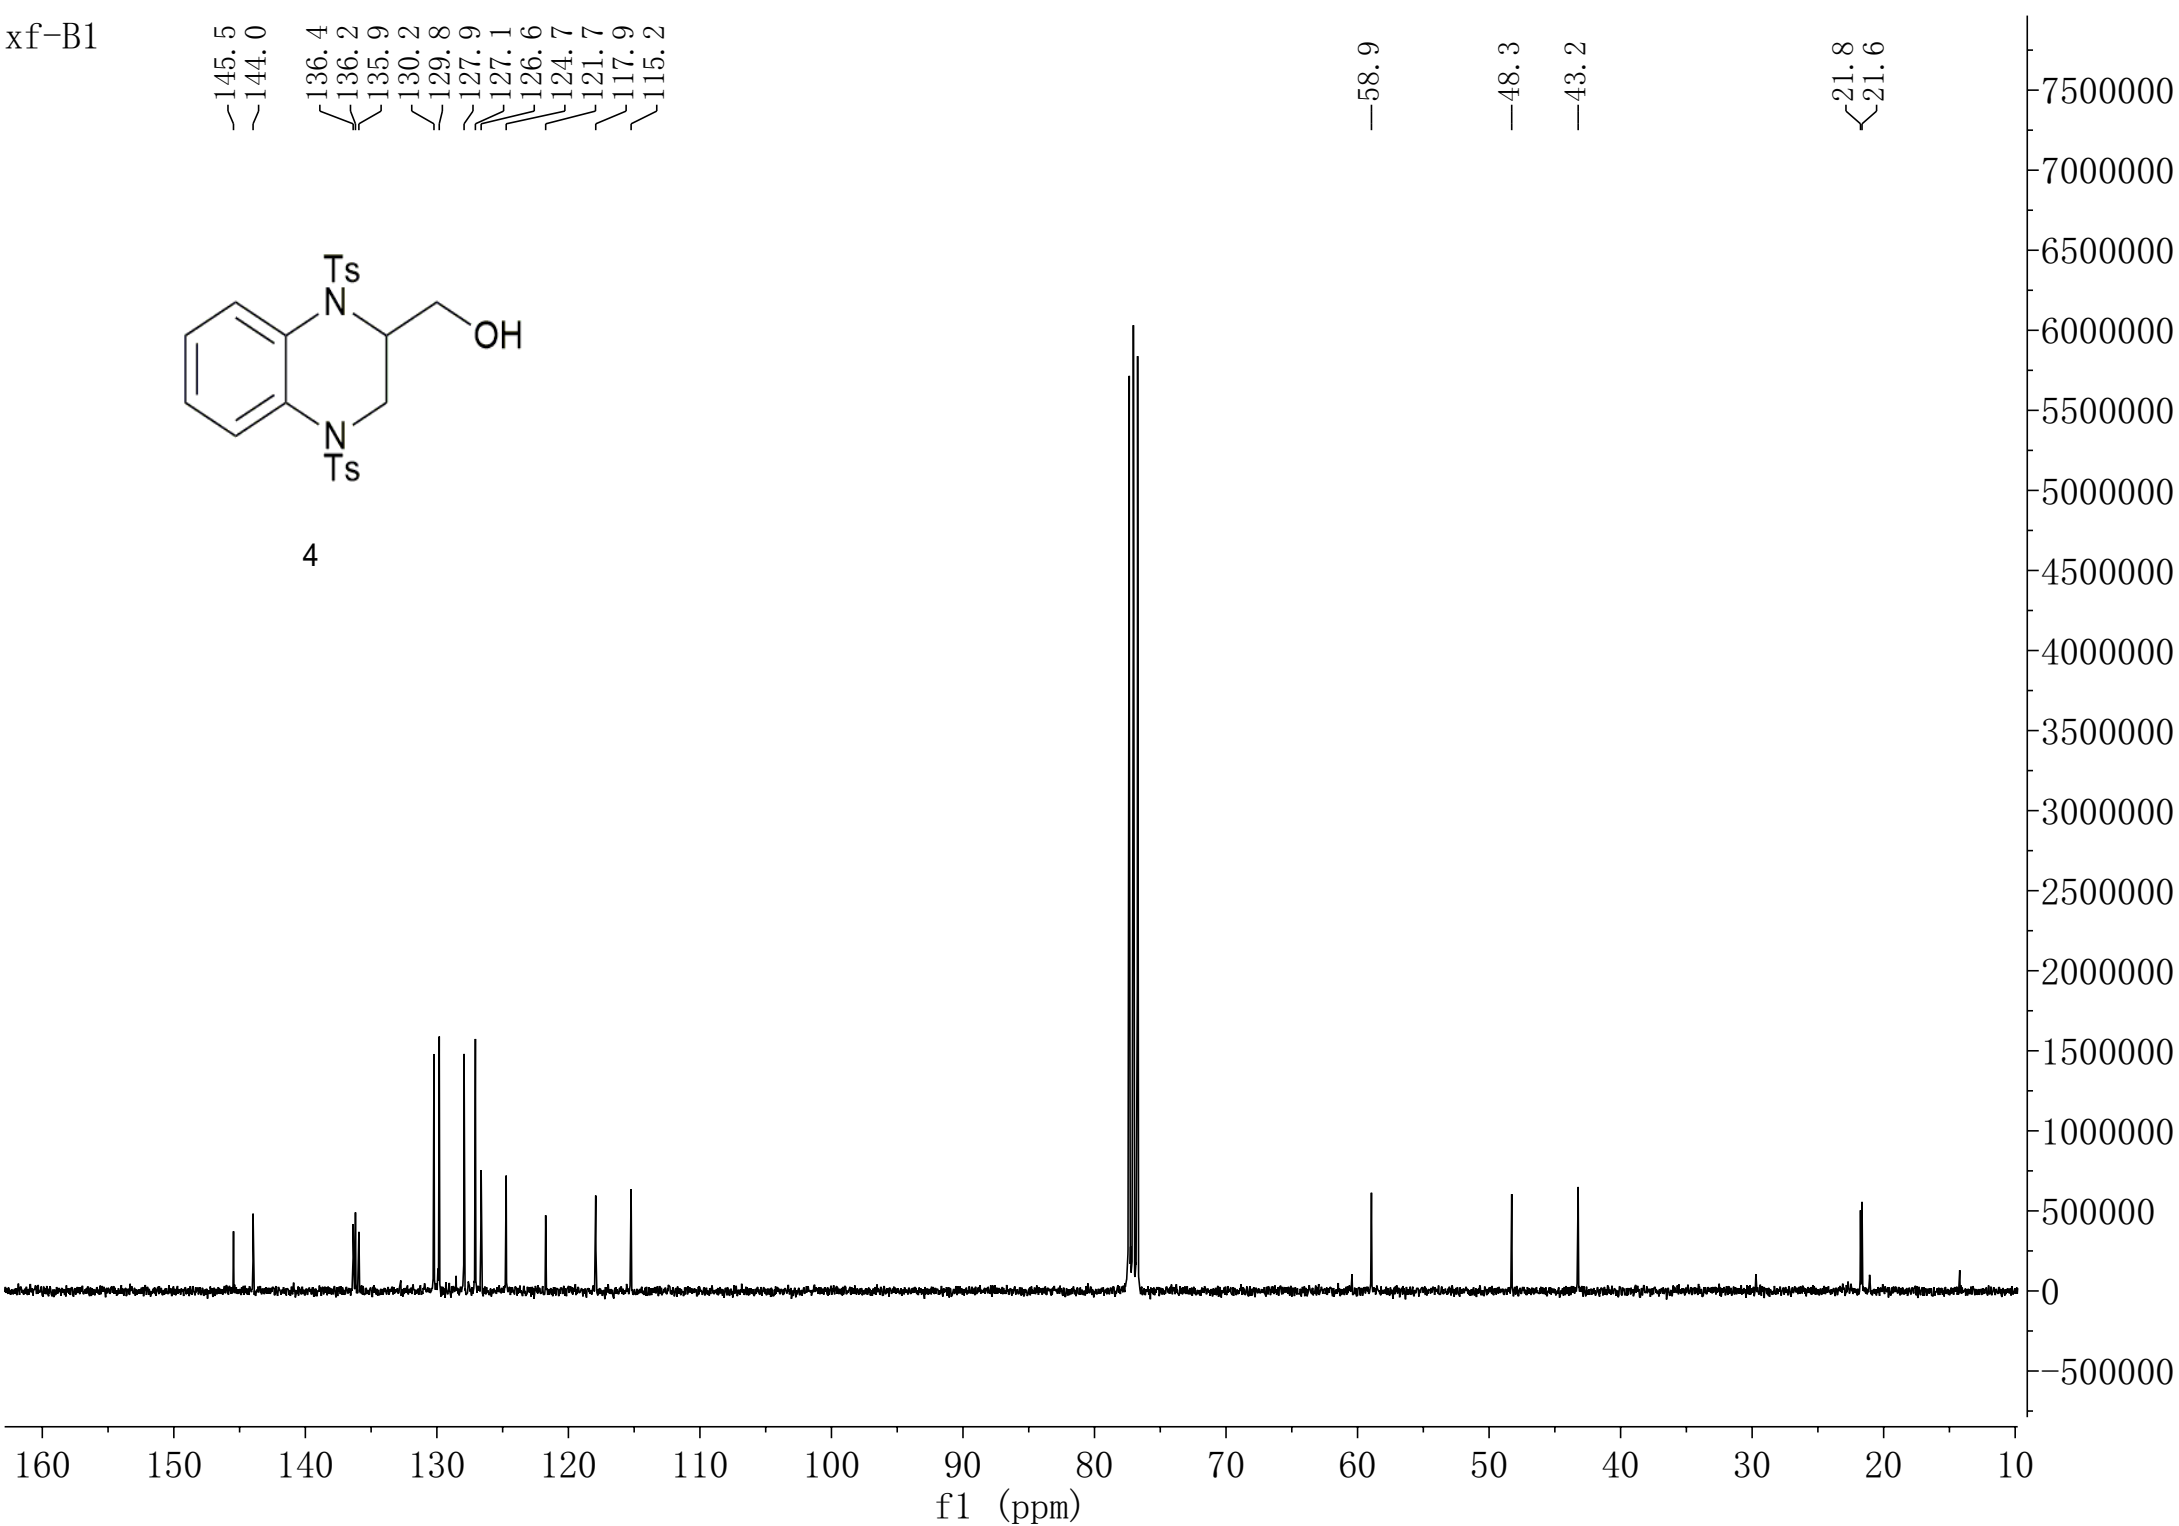

Supplement: d2ob01590k1.pdf [file d2ob01590k1.pdf]
